# Supplementary material for: D–A–D–T-type four-component radical dual-difunctionalization and acylative azidation of two different alkenes
Source: Royal Society of Chemistry journal article supplement (doi:10.1039/d3cc01463k), 2023-01-01
Supplement: d3cc01463k1.pdf [file d3cc01463k1.pdf]

Electronic supplementary information

## **D-A-D-T type four-component radical-dual-difunctionalization and acylative azidation of two different alkenes and TMSN<sub>3</sub>**

Ren-Xiang Liu, Xin Chen and Luo Yang\*

College of Chemistry, Xiangtan University, Hunan, PR China

E-mail: yangluo@xtu.edu.cn

### **Table of contents**

|                                                                                                                    |             |
|--------------------------------------------------------------------------------------------------------------------|-------------|
| <b>I. General information.....</b>                                                                                 | <b>S2</b>   |
| <b>II. General experimental procedures .....</b>                                                                   | <b>S2</b>   |
| <b>III. Optimization of the reaction conditions .....</b>                                                          | <b>S2</b>   |
| <b>IV. The relative reaction rate of two different alkenes .....</b>                                               | <b>S3</b>   |
| <b>V. Radical inhibition experiments .....</b>                                                                     | <b>S4</b>   |
| <b>VI. Scaled-up reaction and post-transformation of product .....</b>                                             | <b>S5</b>   |
| <b>VII. Determination of d.r. value by HPLC for the diastereoisomers of 4a .....</b>                               | <b>S5</b>   |
| <b>VIII. Spectra data of products 4a-4o, 5b-5s, 6b-6j, 7, 8, 9, 10 .....</b>                                       | <b>S6</b>   |
| <b>IX References.....</b>                                                                                          | <b>S29</b>  |
| <b>X. Copies of <sup>1</sup>H and <sup>13</sup>C NMR spectra of products 4a-4o, 5b-5s, 6b-6j, 7, 8, 9, 10.....</b> | <b>S30</b>  |
| <b>XI. Copies of HPLC spectra of products.....</b>                                                                 | <b>S129</b> |

## I. General information

Unless otherwise noted, all commercially available compounds were used as provided without further purification. Solvents (methyl tertiary butyl ether, ethyl acetate, dichloroethane, acetonitrile, chlorobenzene, fluorobenzene) were used as purchased. Thin-layer chromatography (TLC) was performed using E. Merck silica gel 60 F254 precoated plates (0.25 mm) or Sorbent Silica Gel 60 F254 plates. The developed chromatography was analyzed by UV lamp (254 nm). High-resolution mass spectra (HRMS) were obtained from a JEOL JMS-700 instrument (ESI). Melting points are uncorrected. Infrared spectrum (IR) was tested on a nicolet 6700 infrared spectrometer according to “case film technique” and the sample is loaded on the surface of a KBr plate by evaporation of sample solution. Nuclear magnetic resonance (NMR) spectra were recorded on a Bruker Avance 400 spectrometer at ambient temperature. Chemical shifts for  $^1\text{H}$  NMR spectra are reported in parts per million (ppm) from tetramethylsilane (TMS:  $\delta=0$  ppm); while chemical shifts for  $^{13}\text{C}$  NMR spectra are reported in parts per million (ppm) from tetramethylsilane (chloroform:  $\delta$  77.16 ppm). Data are reported as following: chemical shift, multiplicity (s = singlet, d = doublet, dd = doublet of doublets, t = triplet, q = quartet, m = multiplet, br = broad signal), coupling constant (Hz), and integration.

The ratios of d.r. of products were roughly determined by HPLC analysis of crude reaction mixtures (with a UV detector by assuming the response of the two diastereoisomer was identical), since the diastereoisomer ratios might change during the purification procedure such as silica gel column chromatograph.

## II. General experimental procedures

An oven-dried reaction vessel was successively charged with  $\text{Fe}(\text{OTf})_2$  (3.0 mol%) in MTBE (1 mL, self-prepared solution), methyl acrylate (**3a**, 0.2 mmol, 1.0 equiv), styrene (**1a**, 0.4 mmol, 2.0 equiv), 4-methylbenzaldehyde (**2a**, 1.0 mmol, 5.0 equiv), *tert*-butyl hydroperoxide (TBHP, 70% in water, 0.6 mmol, 3.0 equiv) and trimethylsilyl azide ( $\text{TMSN}_3$ , 0.8 mmol, 4.0 equiv). The vessel was sealed under air atmosphere and heated at 35 °C (oil bath temperature) for 24 h. Then the solvent was removed in vacuum. The residue was purified by column chromatography on silica gel with a mixture of ethyl acetate/petroleum ether (30:1,  $R_f = 0.4$ ) as eluent to give the product **4a**.

## III. Optimization of the reaction conditions<sup>a</sup>

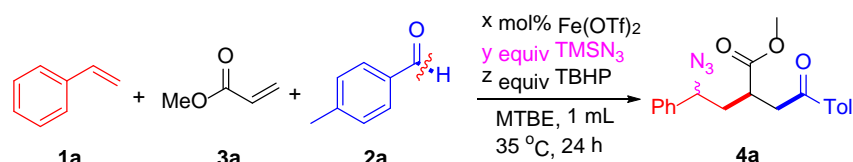

| Entry | Cat. (mol%) | [O](equiv) | Ratio<br>3a:1a:2a:TMSN <sub>3</sub> | Sol.<br>(1mL) | Yield of 4a<br>[%] <sup>b</sup> |
|-------|-------------|------------|-------------------------------------|---------------|---------------------------------|
|-------|-------------|------------|-------------------------------------|---------------|---------------------------------|

|                 |                           |                |           |                    |    |
|-----------------|---------------------------|----------------|-----------|--------------------|----|
| 1               | Fe(OTf) <sub>3</sub> (5)  | TBHP(2.5)      | 1:2:5:4   | MTBE               | 52 |
| 2               | Fe(OTf) <sub>2</sub> (5)  | TBHP(2.5)      | 1:2:5:4   | MTBE               | 56 |
| 3               | Fe(acac) <sub>3</sub> (5) | TBHP(2.5)      | 1:2:5:4   | MTBE               | 15 |
| 4               | Cu(OTf) <sub>2</sub> (5)  | TBHP(2.5)      | 1:2:5:4   | MTBE               | 33 |
| 5               | Fe(OTf) <sub>2</sub> (2)  | TBHP(2.5)      | 1:2:5:4   | MTBE               | 61 |
| 6               | Fe(OTf) <sub>2</sub>      | TBHP(2.5)      | 1:2:5:4   | MTBE               | 64 |
| 7               | Fe(OTf) <sub>2</sub> (3)  | TBHP(2.5)      | 1:2:5:4   | MTBE               | 68 |
| 8               | Fe(OTf) <sub>2</sub> (3)  | TBHP(3)        | 1:2:5:4   | MTBE               | 70 |
| 9               | Fe(OTf) <sub>2</sub> (3)  | TBHP(3.5)      | 1:2:5:4   | MTBE               | 70 |
| 10              | Fe(OTf) <sub>2</sub> (3)  | TBHP(3)        | 1:2:5:4   | Et <sub>2</sub> O  | 48 |
| 11              | Fe(OTf) <sub>2</sub> (3)  | TBHP(3)        | 1:2:5:4   | THF                | 30 |
| 12              | Fe(OTf) <sub>2</sub> (3)  | TBHP(3)        | 1:2:5:4   | CH <sub>3</sub> CN | 42 |
| 13 <sup>c</sup> | Fe(OTf) <sub>2</sub> (3)  | TBHP(3) in oil | 1:2:5:4   | MTBE               | 67 |
| 14              | Fe(OTf) <sub>2</sub> (3)  | DTBP(3)        | 1:2:5:4   | MTBE               | 0  |
| 15              | Fe(OTf) <sub>2</sub> (3)  | TBHP(3)        | 1:2:5:3   | MTBE               | 62 |
| 16              | Fe(OTf) <sub>2</sub> (3)  | TBHP(3)        | 1:2:4:4   | MTBE               | 60 |
| 17              | Fe(OTf) <sub>2</sub> (3)  | TBHP(3)        | 2:1:5:4   | MTBE               | 33 |
| 18              | Fe(OTf) <sub>2</sub> (3)  | TBHP(3)        | 1:1.5:5:4 | MTBE               | 52 |
| 19 <sup>d</sup> | Fe(OTf) <sub>2</sub> (3)  | TBHP(3)        | 1:2:5:4   | MTBE               | 61 |
| 20 <sup>e</sup> | Fe(OTf) <sub>2</sub> (3)  | TBHP(3)        | 1:2:5:4   | MTBE               | 66 |

<sup>a</sup> Conditions: **1a** (0.4 mmol, 2.0 equiv), **2a** (1.0 mmol, 5.0 equiv), **3a** (0.2 mmol, 1.0 equiv), TBHP (70% in H<sub>2</sub>O, 0.6 mmol, 3.0 equiv), TMSN<sub>3</sub> (0.8 mmol, 4.0 equiv), Cat. (x mol %) in solvent (1 mL, prepared solution) stirred at 35 °C for 24 h. <sup>b</sup> isolated yield, <sup>c</sup> TBHP (5.5 mol/L in decane), <sup>d</sup> at 30°C, <sup>e</sup> at 40 °C.

#### IV. The relative reaction rate of two different alkenes

To explore the relative reaction rate of acyl radical with the two different alkenes (methyl acrylate **3a** vs styrene **1a**), An *equal amount* of two different alkenes was added and shorten the reaction time to 2.5 hour. The detailed operations are as follows: an oven-dried reaction vessel was charged with Fe(OTf)<sub>2</sub> (3.0 mol%) in MTBE (1 mL, self-prepared solution), methyl acrylate (**3a**, 0.2 mmol, 1.0 equiv), styrene (**1a**, 0.2 mmol, 1.0 equiv), 4-methylbenzaldehyde (**2a**, 1.0 mmol, 5.0 equiv), *tert*-butyl hydroperoxide (TBHP, 70% in water, 0.6 mmol, 3.0 equiv) and trimethylsilyl azide (TMSN<sub>3</sub>, 0.8 mmol, 4.0 equiv). The vessel was sealed and heated at 35 °C (oil bath temperature) for 2.5 hour. Then, the reaction mixture was carefully isolated by column chromatography and preparative TLC, three products (**8**, **9** and **4a**) were obtained and characterized. Their yields were determined by the <sup>1</sup>H NMR of reaction mixture using CH<sub>3</sub>NO<sub>2</sub> (9.3 mg) as the internal standard.

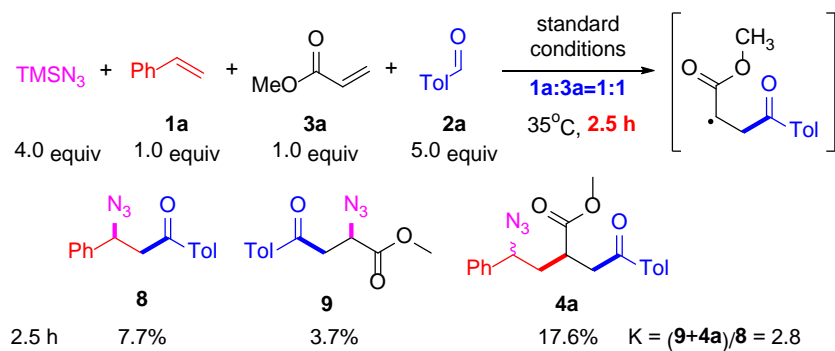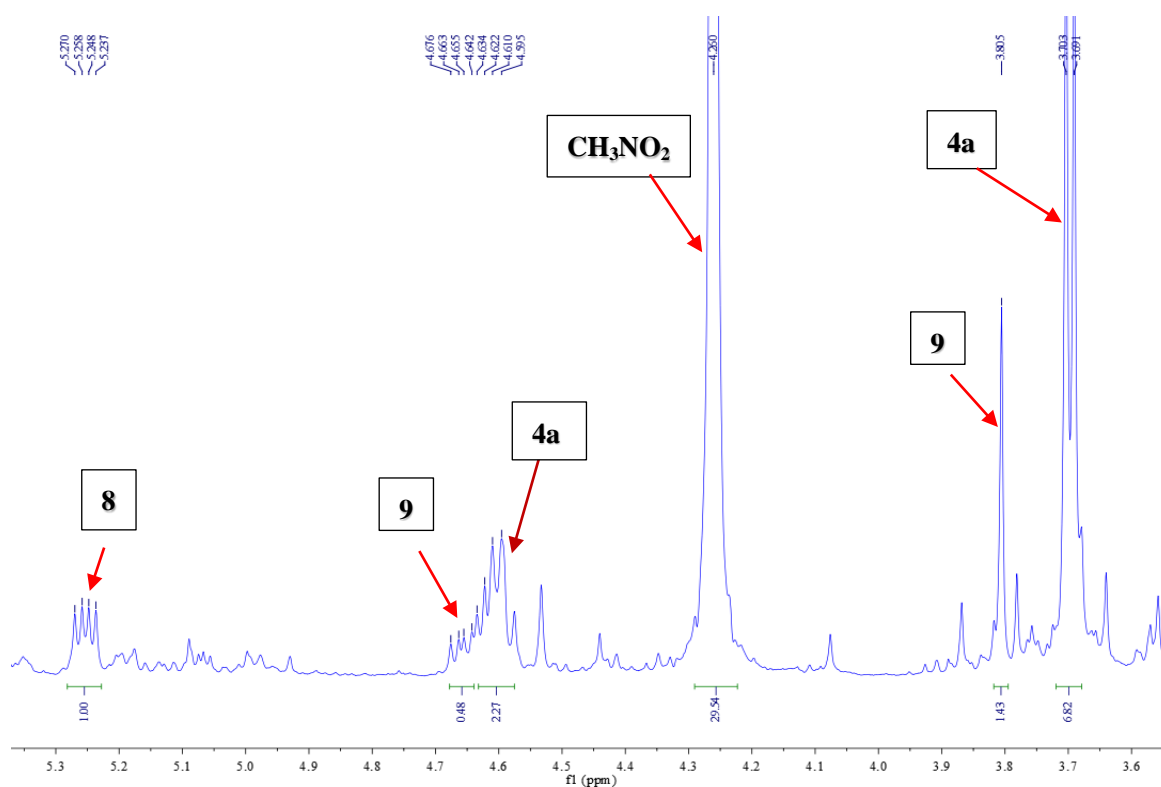

## V. Radical inhibition experiments

To further understand this reaction, radical inhibition experiment was carried out in the presence of TEMPO. We found that: in the presence of TEMPO (2,2,6,6-tetramethyl piperidine-1-oxyl, 4.0 equiv), this reaction was completely inhibited and the 2,2,6,6-tetramethylpiperidin-1-yl 4-methylbenzoate **7** was isolated (ethyl ether/petroleum ether = 1:50,  $R_f = 0.6$ ) and characterized.

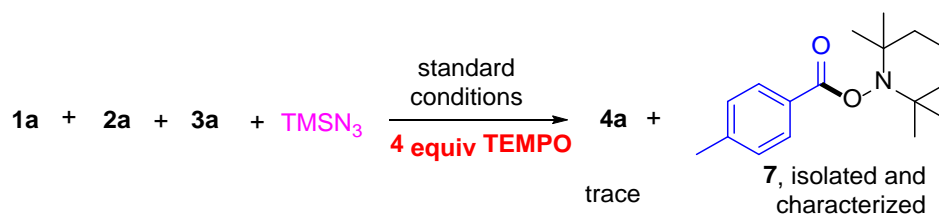

## VI. Scaled-up reaction and post-transformation of product

An oven-dried reaction vessel was successively charged with  $\text{Fe}(\text{OTf})_2$  (3.0 mol%) in MTBE (25 mL, self-prepared solution), methyl acrylate (**3a**, 5.0 mmol, 1.0 equiv), styrene (**1a**, 10.0 mmol, 2.0 equiv), 4-methylbenzaldehyde (**2a**, 25.0 mmol, 5.0 equiv), *tert*-butyl hydroperoxide (TBHP, 70% in water, 15.0 mmol, 3.0 equiv) and trimethylsilyl azide ( $\text{TMSN}_3$ , 20.0 mmol, 4.0 equiv). The vessel was sealed and heated at 35 °C (oil bath temperature) for 24 h. Then 20 mL aqueous 5%  $\text{NaHCO}_3$  was added, which was next extracted with  $\text{CH}_2\text{Cl}_2$ , dried with  $\text{Na}_2\text{SO}_4$  and the solvent was removed in vacuum. The residue was purified by column chromatography on silica gel with a mixture of ethyl acetate/petroleum ether (30:1,  $R_f = 0.4$ ) as eluent to give the product **4a** (1.035g, 59%).

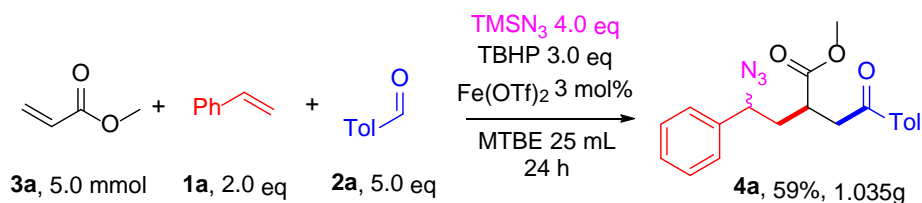

To an oven-dried glass tube, **4a** (0.2 mmol, 1.0 equiv) was dissolved in THF (1.0 mL), then phenylacetylene (0.6 mmol, 3.0 equiv) and  $\text{CuI}$  (0.02 mmol, 0.1 equiv) were added. The reaction was performed at 60 °C for 12 h, and the resulting solution was concentrated under vacuum. The residue was purified by column chromatography on silica gel with a mixture of ethyl acetate/petroleum ether (15:1,  $R_f = 0.3$ ) to afford the white solid product **10** (70.1 mg, 78%).

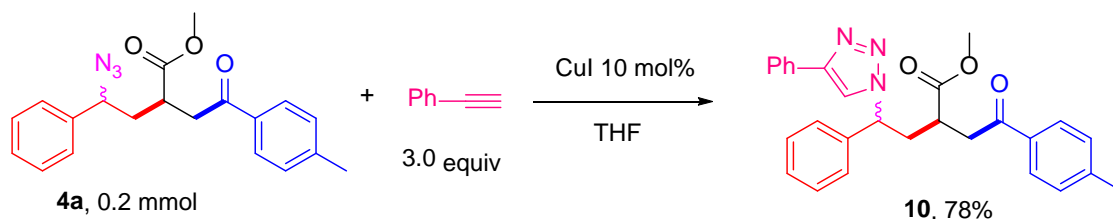

## VII. Determination of d.r. value by HPLC for the diastereoisomers of 4a

The d.r. values of products were roughly determined by HPLC analysis of crude reaction mixtures (with a UV detector by assuming the responses of the two diastereoisomers were identical), since the diastereoisomer ratio might change during the purification procedure such as silica gel column chromatography.

With the model reaction and product **4a** as an example, the crude reaction mixture was analyzed using HPLC on a C-18 column, eluted by CH<sub>3</sub>CN:H<sub>2</sub>O=60:40, the two diastereoisomers could be separated as two peak (retention time 27-28 min), with almost the same peak area. At the same time, the acylative azidation product of the single alkene - methyl acrylate (**3a**) was also detected by the HPLC.

The d.r. values of other products were determined similarly, which were indicated in Tables 2-4 and the HPLC spectrum copied in pages S129-S156.

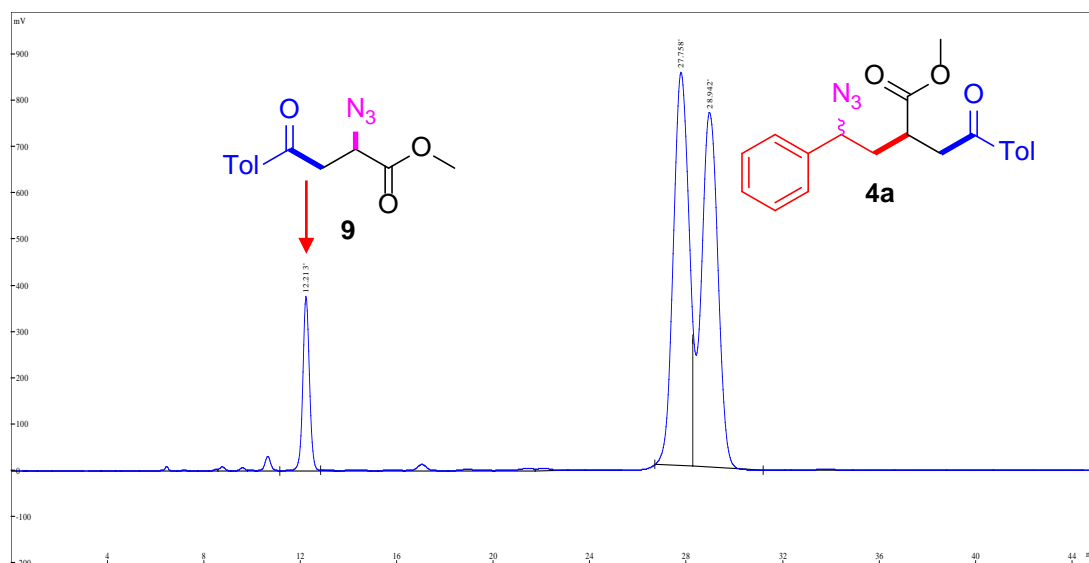

| 序号         | 保留时间           | 浓度              | 峰面积       |
|------------|----------------|-----------------|-----------|
|            | retention time | peak percentage | peak area |
| 1          | 12.213         | 8.885           | 7279889   |
| 2          | 27.758         | 45.99           | 37692931  |
| 3          | 28.942         | 45.12           | 36964602  |
| 总计 (total) |                | 100             | 81937422  |

### VIII. Spectra data of products 4a-4o, 5b-5s, 6b-6j, 7, 8, 9, 10.

(4a) methyl-4-azido-2-(2-oxo-2-(p-tolyl)ethyl)-4-phenylbutanoate

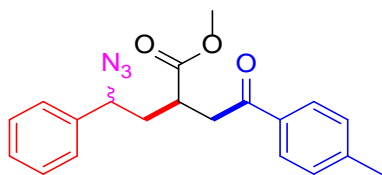

The title compound was prepared according to the general procedure described above by the reaction between styrene (**1a**), 4-methylbenzaldehyde (**2a**), methyl acrylate (**3a**), with TBHP and  $\text{TMSN}_3$ , and purified by flash column chromatography (ethyl ether/petroleum ether = 1:30,  $R_f$  = 0.4) as colorless oil (49.1 mg, 70%).

$^1\text{H}$  NMR (400 MHz,  $\text{CDCl}_3$ )  $\delta$  7.86 – 7.83 (m, 2H), 7.41 – 7.33 (m, 5H), 7.28 – 7.26 (m, 2H), 4.63 – 4.57 (m, 1H), 3.73 – 3.72 (m, 3H), 3.47 – 3.40 (m, 1H), 3.32 – 3.29 (m, 0.4 $\times$ 1H), 3.20 – 3.04 (m, 1.6 $\times$ 1H), 2.42 (s, 3H), 2.34 – 2.26 (m, 0.6 $\times$ 1H), 2.21 – 2.14 (m, 0.4 $\times$ 1H), 2.03 – 1.95 (m, 1H).  $^{13}\text{C}$  NMR (100 MHz,  $\text{CDCl}_3$ )  $\delta$  197.16, 197.12, 175.30, 144.32, 139.37, 138.84, 134.05, 129.42, 128.73, 128.59, 128.25, 128.23, 127.19, 126.92, 64.67, 63.40, 52.15, 40.72, 40.37, 38.67, 38.07, 38.02, 37.92, 21.751. IR ( $\text{cm}^{-1}$ ): 3059, 3027, 2950, 2921, 1734, 1684, 1635, 1608, 1570, 1449, 1334, 815, 754, 701, 551. HRMS: calcd. for  $\text{C}_{20}\text{H}_{21}\text{N}_3\text{O}_3\text{Na}^+$   $[\text{M} + \text{Na}]^+$ : 374.1475; Found: 374.1481.

**(4b) methyl-4-azido-4-(4-fluorophenyl)-2-(2-oxo-2-(p-tolyl)ethyl)butanoate**

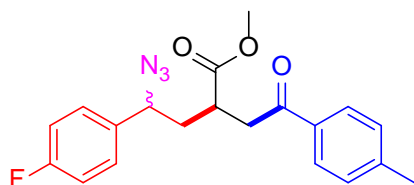

The title compound was prepared according to the general procedure described above by the reaction between 1-fluoro-4-vinylbenzene (**1b**), 4-methylbenzaldehyde (**2a**), methyl acrylate (**3a**), with TBHP and  $\text{TMSN}_3$ , and purified by flash column chromatography (ethyl ether/petroleum ether = 1:30,  $R_f$  = 0.4) as colorless oil (49.5 mg, 67%).

$^1\text{H}$  NMR (400 MHz,  $\text{CDCl}_3$ )  $\delta$  7.85 – 7.81 (m, 2H), 7.34 – 7.28 (m, 2H), 7.27 – 7.23 (m, 2H), 7.10 – 7.04 (m, 2H), 4.62 – 4.56 (m, 1H), 3.71 – 3.70 (m, 3H), 3.45 – 3.39 (m, 1H), 3.30 – 3.23 (m, 0.4 $\times$ 1H), 3.19 – 3.09 (m, 1H), 3.04 – 2.97 (m, 0.6 $\times$ 1H), 2.40 (s, 3H), 2.30 – 2.22 (m, 0.6 $\times$ 1H), 2.16 – 2.10 (m, 0.4 $\times$ 1H), 1.98 – 1.92 (m, 1H).  $^{13}\text{C}$  NMR (100 MHz,  $\text{CDCl}_3$ )  $\delta$  197.00, 196.97, 175.14, 175.10, 162.71 (d,  $J$  = 246.0 Hz), 162.18 (d,  $J$  = 246.0 Hz), 135.21 (d,  $J$  = 3.2 Hz), 134.62 (d,  $J$  = 3.2 Hz), 133.96, 133.92, 129.38, 128.98, 128.89, 128.66, 128.58, 128.18, 128.16, 115.93 (d,  $J$  = 11.5 Hz), 115.87 (d,  $J$  = 11.5 Hz), 63.91, 63.60, 52.11, 40.66, 40.32, 38.66, 37.99, 37.86, 37.76, 21.67.  $^{19}\text{F}$  NMR (376 MHz,  $\text{CDCl}_3$ )  $\delta$  (-113.06, -113.31). IR ( $\text{cm}^{-1}$ ): 3341, 3034, 2952, 2474, 2101, 1898, 1734, 1682, 1509, 1439, 1099, 1006, 838, 736, 537, 462. HRMS: calcd. for  $\text{C}_{20}\text{H}_{20}\text{FN}_3\text{O}_3\text{Na}^+$   $[\text{M} + \text{Na}]^+$ : 392.1381; Found: 392.1391.

**(4c) methyl-4-azido-4-(4-chlorophenyl)-2-(2-oxo-2-(p-tolyl)ethyl)butanoate**

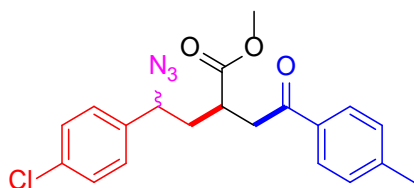

The title compound was prepared according to the general procedure described above by the reaction between 1-chloro-4-vinylbenzene (**1c**), 4-methylbenzaldehyde (**2a**), methyl acrylate (**3a**), with TBHP and TMSN<sub>3</sub>, and purified by flash column chromatography (ethyl ether/petroleum ether = 1:30, R<sub>f</sub> = 0.4) as colorless oil (47.7 mg, 62%).

<sup>1</sup>H NMR (400 MHz, CDCl<sub>3</sub>) δ 7.84 – 7.81 (m, 2H), 7.38 – 7.34 (m, 2H), 7.29 – 7.24 (m, 4H), 4.61 – 4.55 (m, 1H), 3.72 – 3.71 (m, 3H), 3.44 – 3.38 (m, 1H), 3.31 – 3.24 (m, 0.3×1H), 3.19 – 3.08 (m, 1H), 3.03 – 2.96 (m, 0.7×1H), 2.41 (s, 3H), 2.29 – 2.21 (m, 0.7×1H), 2.16 – 2.09 (m, 0.3×1H), 1.96 – 1.88 (m, 1H). <sup>13</sup>C NMR (100 MHz, CDCl<sub>3</sub>) δ 197.04, 197.00, 175.21, 175.16, 144.44, 144.42, 137.98, 137.34, 134.53, 134.35, 133.94, 133.92, 129.45, 129.27, 129.21, 128.60, 128.28, 128.24, 128.22, 63.99, 63.69, 52.24, 40.73, 40.39, 38.67, 37.96, 37.87, 37.74, 21.78. IR (cm<sup>-1</sup>): 3031, 2951, 2922, 2099, 1735, 1682, 1606, 1573, 1492, 1427, 1408, 1092, 1014, 810, 737, 528. HRMS: calcd. for C<sub>20</sub>H<sub>20</sub>ClN<sub>3</sub>O<sub>3</sub>Na<sup>+</sup> [M+ Na]<sup>+</sup>: 408.1085; Found: 408.1095.

**(4d) methyl-4-azido-4-(4-(chloromethyl)phenyl)-2-(2-oxo-2-(p-tolyl)ethyl)butanoate**

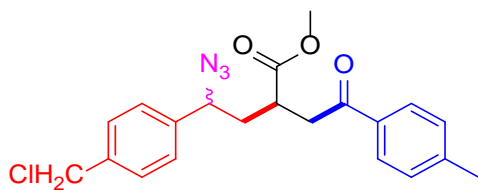

The title compound was prepared according to the general procedure described above by the reaction between 1-(chloromethyl)-4-vinylbenzene (**1d**), 4-methylbenzaldehyde (**2a**), methyl acrylate (**3a**), with TBHP and TMSN<sub>3</sub>, and purified by flash column chromatography (ethyl ether/petroleum ether = 1:30, R<sub>f</sub> = 0.4) as pale yellow oil (48.7 mg, 61%).

<sup>1</sup>H NMR (400 MHz, CDCl<sub>3</sub>) δ 7.84 – 7.81 (m, 2H), 7.43 – 7.39 (m, 2H), 7.35 – 7.31 (m, 2H), 7.26 – 7.24 (m, 2H), 4.63 – 4.58 (m, 3H), 3.71 – 3.70 (m, 3H), 3.44 – 3.38 (m, 1H), 3.31 – 3.26 (m, 0.4×1H), 3.17 – 3.00 (m, 1.6×1H), 2.40 (s, 3H), 2.31 – 2.23 (m, 0.6×1H), 2.18 – 2.11 (m, 0.4×1H), 1.98 – 1.92 (m, 1H). <sup>13</sup>C NMR (100 MHz, CDCl<sub>3</sub>) δ 197.12, 197.07, 175.24, 144.40, 144.38, 139.68, 139.09, 137.91, 137.79, 133.94, 133.93, 129.43, 129.27, 129.25, 128.23, 128.22, 127.57, 127.30, 64.28, 63.99, 52.22, 45.78, 40.72, 40.37, 38.66, 38.01, 37.93, 37.80, 21.78. IR (cm<sup>-1</sup>): 3031, 2951, 2100, 1731, 1681, 1607, 1573, 1513, 1436, 1102, 1000, 810, 737, 682, 636, 560, 463. HRMS: calcd. for C<sub>21</sub>H<sub>22</sub>ClN<sub>3</sub>O<sub>3</sub>Na<sup>+</sup> [M+ Na]<sup>+</sup>: 422.1242; Found: 422.1254.

**(4e) methyl-4-azido-4-(4-methoxyphenyl)-2-(2-oxo-2-(p-tolyl)ethyl)butanoate**



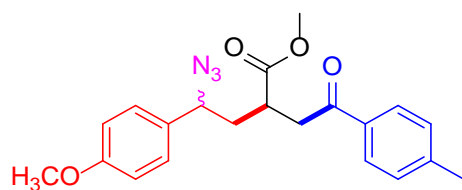

The title compound was prepared according to the general procedure described above by the reaction between 1-methoxy-4-vinylbenzene (**1e**), 4-methylbenzaldehyde (**2a**), methyl acrylate (**3a**), with TBHP and TMSN<sub>3</sub>, and purified by flash column chromatography (ethyl ether/petroleum ether = 1:15, R<sub>f</sub> = 0.4) as colorless oil (36.6 mg, 48%).

<sup>1</sup>H NMR (400 MHz, CDCl<sub>3</sub>) δ 7.85 – 7.81 (m, 2H), 7.28 – 7.24 (m, 4H), 6.92 – 6.89 (m, 2H), 4.56 – 4.50 (m, 1H), 3.81 (s, 3H), 3.72 – 3.70 (m, 3H), 3.49 – 3.38 (m, 1H), 3.28 – 3.21 (m, 0.4×1H), 3.17 – 3.07 (m, 1H), 3.08 – 2.98 (m, 0.6×1H), 2.41 (s, 3H), 2.30 – 2.23 (m, 0.6×1H), 2.17 – 2.10 (m, 0.4×1H), 2.01 – 1.90 (m, 1H). <sup>13</sup>C NMR (100 MHz, CDCl<sub>3</sub>) δ 197.21, 175.38, 159.82, 159.74, 144.32, 134.03, 134.01, 131.23, 130.71, 129.42, 128.51, 128.24, 114.37, 114.33, 64.16, 63.91, 55.39, 52.17, 40.65, 40.41, 38.48, 37.99, 37.91, 21.78. IR (cm<sup>-1</sup>): 3000, 2952, 2838, 2094, 1731, 1681, 1608, 1513, 1438, 1406, 1113, 1033, 833, 810, 736, 545, 461. HRMS: calcd. for C<sub>21</sub>H<sub>23</sub>N<sub>3</sub>O<sub>4</sub>Na<sup>+</sup> [M+ Na]<sup>+</sup>: 404.1581; Found: 404.1590.

**(4f) methyl-4-azido-2-(2-oxo-2-(p-tolyl)ethyl)-4-(4-(trifluoromethyl)phenyl)butanoate**

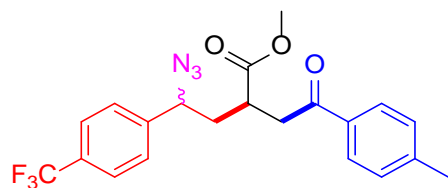

The title compound was prepared according to the general procedure described above by the reaction between 1-(trifluoromethyl)-4-vinylbenzene (**1f**), 4-methylbenzaldehyde (**2a**), methyl acrylate (**3a**), with TBHP and TMSN<sub>3</sub>, and purified by flash column chromatography (ethyl ether/petroleum ether = 1:30, R<sub>f</sub> = 0.4) as colorless oil (35.2 mg, 42%).

<sup>1</sup>H NMR (400 MHz, CDCl<sub>3</sub>) δ 7.84 – 7.81 (m, 2H), 7.67 – 7.63 (m, 2H), 7.49 – 7.45 (m, 2H), 7.26 – 7.24 (m, 2H), 4.72 – 4.65 (m, 1H), 3.72 – 3.71 (m, 3H), 3.46 – 3.39 (m, 1H), 3.33 – 3.27 (m, 0.5×1H), 3.14 (td, *J* = 17.6, 6.0 Hz, 1H), 3.04 – 2.98 (m, 0.5×1H), 2.41 (s, 3H), 2.32 – 2.24 (m, 0.6×1H), 2.19 – 2.12 (m, 0.5×1H), 2.00 – 1.89 (m, 1H). <sup>13</sup>C NMR (100 MHz, CDCl<sub>3</sub>) δ 196.99, 196.93, 175.15, 175.07, 163.77, 139.36, 138.83, 130.83 (q, *J* = 32.3 Hz), 130.67 (q, *J* = 32.3 Hz), 129.59, 129.03, 128.99, 128.70, 128.56, 127.17, 126.89, 126.79 (q, *J* = 3.7 Hz), 126.02 (q, *J* = 3.8 Hz), 123.99 (d, *J* = 270.5 Hz), 113.86, 64.65, 64.39, 55.56, 52.12, 40.47, 40.13, 38.66, 38.06, 37.95. <sup>19</sup>F NMR (376 MHz, CDCl<sub>3</sub>) δ (-61.05, -62.65, -62.67, -64.29). IR (cm<sup>-1</sup>): 3032, 2953, 2924, 2102, 1732, 1682, 1607, 1573, 1437, 1325, 1068, 1017, 841, 810, 603, 551. HRMS: calcd. for C<sub>21</sub>H<sub>20</sub>F<sub>3</sub>N<sub>3</sub>O<sub>3</sub>Na<sup>+</sup> [M+ Na]<sup>+</sup>: 442.1349; Found: 442.1359.

**(4g) methyl-4-([1,1'-biphenyl]-4-yl)-4-azido-2-(2-oxo-2-(p-tolyl)ethyl)butanoate**

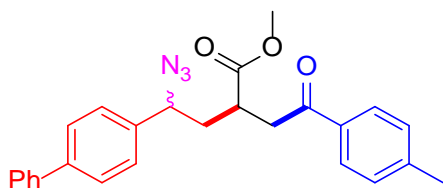

The title compound was prepared according to the general procedure described above by the reaction between 4-vinyl-1,1'-biphenyl (**1g**), 4-methylbenzaldehyde (**2a**), methyl acrylate (**3a**), with TBHP and TMSN<sub>3</sub>, and purified by flash column chromatography (ethyl ether/petroleum ether = 1:25, R<sub>f</sub> = 0.3) as colorless oil (55.5 mg, 65%).

<sup>1</sup>H NMR (400 MHz, CDCl<sub>3</sub>) δ 7.84 – 7.81 (m, 2H), 7.61 – 7.56 (m, 4H), 7.45 – 7.34 (m, 5H), 7.23 – 7.21 (m, 2H), 4.67 – 4.61 (m, 1H), 3.72 – 3.70 (m, 3H), 3.46 – 3.40 (m, 1H), 3.32 – 3.28 (m, 0.4×1H), 3.18 – 3.04 (m, 1.6×1H), 2.38 – 2.37 (m, 3H), 2.35 – 2.28 (m, 0.6×1H), 2.23 – 2.16 (m, 0.4×1H), 2.05 – 1.97 (m, 1H). <sup>13</sup>C NMR (100 MHz, CDCl<sub>3</sub>) δ 197.10, 197.04, 175.23, 144.26, 141.54, 141.42, 140.46, 138.30, 137.75, 134.00, 133.98, 129.37, 128.87, 128.20, 128.18, 127.69, 127.65, 127.59, 127.33, 127.14, 64.35, 64.10, 52.12, 40.65, 40.35, 38.56, 37.99, 37.85, 21.69. IR (cm<sup>-1</sup>): 3030, 2950, 2099, 1732, 1682, 1606, 1573, 1486, 1437, 1407, 1077, 840, 766, 736, 698, 564, 511. HRMS: calcd. for C<sub>26</sub>H<sub>25</sub>N<sub>3</sub>O<sub>3</sub>Na<sup>+</sup> [M+ Na]<sup>+</sup>: 450.1788; Found: 450.1797.

**(4h) methyl-4-(4-acetoxyphenyl)-4-azido-2-(2-oxo-2-(p-tolyl)ethyl)butanoate**

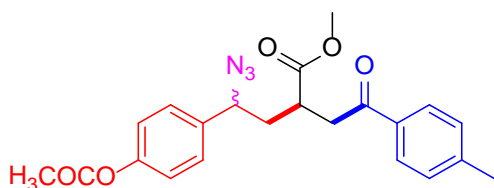

The title compound was prepared according to the general procedure described above by the reaction between 4-vinylphenyl acetate (**1h**), 4-methylbenzaldehyde (**2a**), methyl acrylate (**3a**), with TBHP and TMSN<sub>3</sub>, and purified by flash column chromatography (ethyl ether/petroleum ether = 1:15, R<sub>f</sub> = 0.3) as colorless oil (49.1 mg, 60%).

<sup>1</sup>H NMR (400 MHz, CDCl<sub>3</sub>) δ 7.85 – 7.21 (m, 2H), 7.37 – 7.33 (m, 2H), 7.27 – 7.24 (m, 2H), 7.13 – 7.10 (m, 2H), 4.63 – 4.57 (m, 1H), 3.71 – 3.70 (m, 3H), 3.45 – 3.39 (m, 1H), 3.31 – 3.27 (m, 0.5×1H), 3.18 – 3.05 (m, 1.5×1H), 2.40 (s, 3H), 2.30 (s, 3H), 2.28 – 2.23 (m, 0.5×1H), 2.16 – 2.10 (m, 0.5×1H), 1.98 – 1.91 (m, 1H). <sup>13</sup>C NMR (100 MHz, CDCl<sub>3</sub>) δ 197.11, 197.06, 175.24, 169.43, 169.38, 150.74, 150.63, 144.34, 137.06, 136.49, 133.93, 130.24, 129.41, 129.25, 128.21, 127.95, 122.16, 122.13, 64.08, 63.78, 52.20, 40.74, 40.32, 38.80, 38.13, 37.95, 37.81, 21.75, 21.22. IR (cm<sup>-1</sup>): 3033, 2952, 2100, 1732, 1682, 1607, 1573, 1508, 1369, 1109, 1016, 911, 847, 811, 736, 542. HRMS: calcd. for C<sub>22</sub>H<sub>23</sub>N<sub>3</sub>O<sub>5</sub>Na<sup>+</sup> [M+ Na]<sup>+</sup>: 432.1530; Found: 432.1540.

**(4i) methyl-4-azido-4-(3-chlorophenyl)-2-(2-oxo-2-(p-tolyl)ethyl)butanoate**

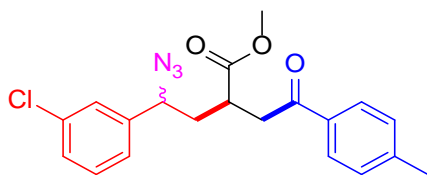

The title compound was prepared according to the general procedure described above by the reaction between 1-chloro-3-vinylbenzene (**1i**), 4-methylbenzaldehyde (**2a**), methyl acrylate (**3a**), with TBHP and TMSN<sub>3</sub>, and purified by flash column chromatography (ethyl ether/petroleum ether = 1:30, R<sub>f</sub> = 0.4) as reddish brown oil (46.2 mg, 60%).

<sup>1</sup>H NMR (400 MHz, CDCl<sub>3</sub>) δ 7.85 – 7.82 (m, 2H), 7.33 – 7.30 (m, 3H), 7.26 – 7.20 (m, 3H), 4.62 – 4.55 (m, 1H), 3.73 – 3.72 (m, 3H), 3.46 – 3.39 (m, 1H), 3.32 – 3.25 (m, 0.4×1H), 3.20 – 3.10 (m, 1H), 3.06 – 3.00 (m, 0.6×1H), 2.40 (s, 3H), 2.29 – 2.21 (m, 0.6×1H), 2.16 – 2.09 (m, 0.4×1H), 1.96 – 1.87 (m, 1H). <sup>13</sup>C NMR (100 MHz, CDCl<sub>3</sub>) δ 197.01, 196.96, 175.13, 175.10, 144.40, 141.65, 141.02, 134.92, 134.88, 133.94, 130.34, 130.30, 129.43, 128.88, 128.69, 128.22, 127.30, 127.01, 125.37, 125.03, 64.11, 63.81, 52.21, 40.75, 40.34, 38.76, 38.03, 37.89, 37.75, 21.75. IR (cm<sup>-1</sup>): 3031, 2951, 2922, 2100, 1713, 1681, 1606, 1573, 1477, 1435, 999, 880, 810, 737, 697, 561. HRMS: calcd. for C<sub>20</sub>H<sub>20</sub>ClN<sub>3</sub>O<sub>3</sub>Na<sup>+</sup> [M+ Na]<sup>+</sup>: 408.1085; Found: 408.1094.

**(4j) methyl-4-azido-2-(2-oxo-2-(p-tolyl)ethyl)-4-phenylpentanoate**

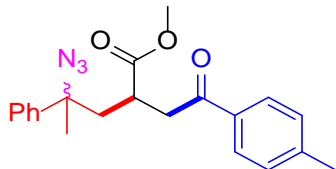

The title compound was prepared according to the general procedure described above by the reaction between prop-1-en-2-ylbenzene (**1j**), 4-methylbenzaldehyde (**2a**), methyl acrylate (**3a**), with TBHP and TMSN<sub>3</sub>, and purified by flash column chromatography (ethyl ether/petroleum ether = 1:30, R<sub>f</sub> = 0.4) as colorless oil (40.9 mg, 56%).

<sup>1</sup>H NMR (400 MHz, CDCl<sub>3</sub>) δ 7.78 – 7.69 (m, 2H), 7.42 – 7.33 (m, 4H), 7.28 – 7.19 (m, 3H), 3.60 – 3.55 (m, 3H), 3.31 – 3.25 (m, 0.6×1H), 3.13 – 2.92 (m, 2.4×1H), 2.44 – 2.38 (m, 4H), 2.04 – 1.99 (m, 1H), 1.77(s, 1.8×1H), 1.75 (s, 1.2×1H). <sup>13</sup>C NMR (100 MHz, CDCl<sub>3</sub>) δ 197.24, 175.75, 175.68, 144.21, 144.16, 142.82, 142.75, 134.10, 134.03, 129.38, 129.33, 128.75, 128.72, 128.22, 128.19, 127.68, 127.65, 125.73, 125.72, 66.37, 66.35, 52.09, 52.03, 43.94, 43.82, 41.36, 41.10, 37.04, 26.06, 25.89, 21.75. IR (cm<sup>-1</sup>): 3029, 2949, 2107, 1737, 1682, 1607, 1537, 1494, 1445, 1407, 1030, 810, 765, 700, 645, 563. HRMS: calcd. for C<sub>21</sub>H<sub>23</sub>N<sub>3</sub>O<sub>3</sub>Na<sup>+</sup> [M+ Na]<sup>+</sup>: 388.1632; Found: 388.1640.

**(4k) methyl-4-azido-2-(2-oxo-2-(p-tolyl)ethyl)-4,4-diphenylbutanoate**

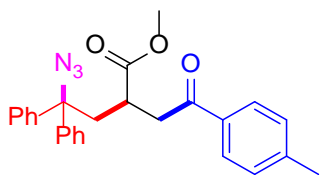

The title compound was prepared according to the general procedure described above by the reaction between ethene-1,1-diyldibenzene (**1k**), 4-methylbenzaldehyde (**2a**), methyl acrylate (**3a**), with TBHP and TMSN<sub>3</sub>, and purified by flash column chromatography (ethyl ether/petroleum ether = 1:30, R<sub>f</sub> = 0.3) as pale yellow oil (57.2 mg, 67%).

<sup>1</sup>H NMR (400 MHz, CDCl<sub>3</sub>) δ 7.72 (d, *J* = 8.0 Hz, 2H), 7.33 – 7.23 (m, 10H), 7.20 (d, *J* = 8.0 Hz, 2H), 3.59 (s, 3H), 3.20 – 3.07 (m, 2H), 3.00 – 2.94 (m, 2H), 2.60 (dd, *J* = 10.0, 4.8 Hz, 1H), 2.38 (s, 3H). <sup>13</sup>C NMR (100 MHz, CDCl<sub>3</sub>) δ 197.18, 175.67, 144.13, 142.39, 142.24, 133.93, 129.30, 128.52, 128.48, 128.18, 127.92, 127.74, 127.31, 127.08, 71.98, 52.14, 41.08, 40.06, 36.88, 21.73. IR (cm<sup>-1</sup>): 3058, 3029, 2949, 2108, 1775, 1732, 1682, 1607, 1493, 1446, 1032, 977, 810, 736, 700, 656, 563. HRMS: calcd. for C<sub>26</sub>H<sub>25</sub>N<sub>3</sub>O<sub>3</sub>Na<sup>+</sup> [M+ Na]<sup>+</sup>: 450.1788; Found: 450.1794.

**(4l) methyl-4-azido-4-(naphthalen-2-yl)-2-(2-oxo-2-(p-tolyl)ethyl)butanoate**

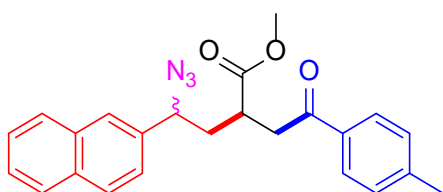

The title compound was prepared according to the general procedure described above by the reaction between 2-vinylnaphthalene (**1l**), 4-methylbenzaldehyde (**2a**), methyl acrylate (**3a**), with TBHP and TMSN<sub>3</sub>, and purified by flash column chromatography (ethyl ether/petroleum ether = 1:30, R<sub>f</sub> = 0.3) as colorless oil (49.7 mg, 62%).

<sup>1</sup>H NMR (400 MHz, CDCl<sub>3</sub>) 7.89 – 7.77 (m, 6H), 7.53 – 7.43 (m, 3H), 7.26 – 7.22 (m, 2H), 4.79 – 4.74 (m, 1H), 3.72 – 3.69 (m, 3H), 3.47 – 3.40 (m, 1H), 3.36 – 3.30 (m, 0.4×1H), 3.21 – 3.04 (m, 1.6×1H), 2.40 – 2.33 (m, 3.6×1H), 2.16 – 2.09 (m, 0.4×1H), 2.10 – 2.02 (m, 1H). <sup>13</sup>C NMR (100 MHz, CDCl<sub>3</sub>) δ 197.16, 197.13, 175.34, 144.34, 136.74, 136.16, 133.98, 133.41, 133.33, 133.24, 129.41, 129.18, 129.09, 128.25, 128.23, 128.19, 128.14, 127.85, 127.84, 126.73, 126.63, 126.56, 126.51, 126.19, 124.40, 124.35, 64.90, 64.64, 52.22, 40.76, 40.43, 38.64, 38.05, 37.99, 37.94, 21.76. IR (cm<sup>-1</sup>): 3056, 2950, 2098, 1731, 1682, 1606, 1573, 1508, 1436, 1407, 894, 858, 811, 748, 559, 479. HRMS: calcd. for C<sub>24</sub>H<sub>23</sub>N<sub>3</sub>O<sub>3</sub>Na<sup>+</sup> [M+ Na]<sup>+</sup>: 424.1632; Found: 424.1640.

**(4m) methyl-4-azido-4-(naphthalen-1-yl)-2-(2-oxo-2-(p-tolyl)ethyl)butanoate**

*The two diastereoisomers were separated by column chromatograph.*

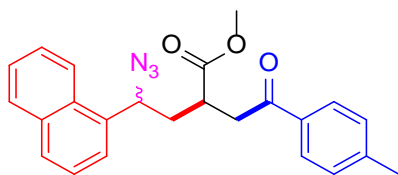

The title compound was prepared according to the general procedure described above by the reaction between 1-vinylnaphthalene (**1m**), 4-methylbenzaldehyde (**2a**), methyl acrylate (**3a**), with TBHP and TMSN<sub>3</sub>, and purified by flash column chromatography (ethyl ether/petroleum ether = 1:30, R<sub>f</sub> = 0.3~0.35, the R<sub>f</sub> gap between **4m** and **4m'**) as colorless oil (**4m** + **4m'** = 52.2 mg, 65%).

<sup>1</sup>H NMR (400 MHz, CDCl<sub>3</sub>) δ 8.12 (d, *J* = 8.4 Hz, 1H), 7.89 (d, *J* = 8.4 Hz, 1H), 7.82 (d, *J* = 8.0 Hz, 3H), 7.61 – 7.47 (m, 4H), 7.24 (d, *J* = 8.0 Hz, 2H), 5.45 (dd, *J* = 10.4, 3.2 Hz, 1H), 3.78 (s, 3H), 3.48 – 3.40 (m, 2H), 3.22 – 3.16 (m, 1H), 2.40 (s, 3H), 2.37 – 2.31 (m, 1H), 2.05 – 1.98 (m, 1H). <sup>13</sup>C NMR (100 MHz, CDCl<sub>3</sub>) δ 197.10, 175.50, 144.37, 135.41, 134.09, 134.01, 130.52, 129.44, 129.17, 129.00, 128.26, 126.83, 126.04, 125.51, 124.11, 122.92, 61.52, 52.27, 40.93, 38.44, 38.04, 21.79. IR (cm<sup>-1</sup>): 3051, 2950, 2922, 2104, 1732, 1682, 1606, 1509, 1437, 1260, 1180, 802, 779, 750, 560. HRMS: calcd. for C<sub>24</sub>H<sub>23</sub>N<sub>3</sub>O<sub>3</sub>Na<sup>+</sup> [M+ Na]<sup>+</sup>: 424.1632; Found: 424.1631.

#### (**4m'**)

<sup>1</sup>H NMR (400 MHz, CDCl<sub>3</sub>) δ 8.11 (d, *J* = 8.0 Hz, 1H), 7.89 (d, *J* = 8.0 Hz, 1H), 7.83 (d, *J* = 8.0 Hz, 3H), 7.60 – 7.47 (m, 4H), 7.24 (d, *J* = 7.6 Hz, 2H), 5.41 (dd, *J* = 8.8, 5.2 Hz, 1H), 3.71 (s, 3H), 3.50 – 3.41 (m, 2H), 3.24 – 3.16 (m, 1H), 2.49 – 2.43 (m, 1H), 2.40 (s, 3H), 2.33 – 2.17 (m, 1H). <sup>13</sup>C NMR (100 MHz, CDCl<sub>3</sub>) δ 197.23, 175.44, 144.37, 134.49, 134.09, 134.18, 134.20, 130.73, 129.44, 129.30, 129.23, 128.25, 126.75, 126.05, 125.44, 124.81, 123.05, 61.42, 52.24, 40.38, 38.58, 37.29, 21.79. IR (cm<sup>-1</sup>): 3050, 2950, 2923, 2103, 1734, 1682, 1606, 1573, 1510, 1436, 1224, 1168, 804, 780, 560. HRMS: calcd. for C<sub>24</sub>H<sub>23</sub>N<sub>3</sub>O<sub>3</sub>Na<sup>+</sup> [M+ Na]<sup>+</sup>: 424.1632; Found: 424.1632.

#### (**4n**) methyl-4-azido-2-(2-oxo-2-(p-tolyl)ethyl)-4-(thiophen-2-yl)butanoate

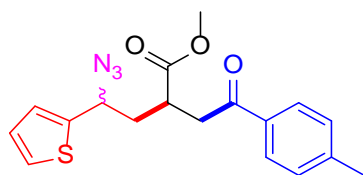

The title compound was prepared according to the general procedure described above by the reaction between 2-vinylthiophene (**1n**), 4-methylbenzaldehyde (**2a**), methyl acrylate (**3a**), with TBHP and TMSN<sub>3</sub>, and purified by flash column chromatography (ethyl ether/petroleum ether = 1:25, R<sub>f</sub> = 0.3) as brown oil (33.6 mg, 47%).

<sup>1</sup>H NMR (400 MHz, CDCl<sub>3</sub>) 7.86 – 7.82 (m, 2H), 7.32– 7.29 (m, 1H), 7.27 – 7.24 (m, 2H), 7.09 – 7.08 (m, 1H), 7.02 – 6.99 (m, 1H), 4.88 – 4.83 (m, 1H), 3.72 – 3.71 (m, 3H), 3.49 – 3.40 (m, 1H),

3.32 – 3.29 (m, 0.5×1H), 3.20 – 3.06 (m, 1.6×1H), 2.40 (s, 3H), 2.38 – 2.25 (m, 1H), 2.10 – 2.01 (m, 1H). <sup>13</sup>C NMR (100 MHz, CDCl<sub>3</sub>) δ 197.03, 197.00, 175.07, 144.33, 144.31, 142.10, 141.54, 133.99, 133.97, 129.40, 128.23, 128.22, 126.99, 126.94, 126.39, 126.10, 125.83, 125.80, 59.69, 59.54, 52.18, 40.54, 40.30, 38.75, 38.39, 37.95, 37.73, 21.73. IR (cm<sup>-1</sup>): 3341, 3031, 2951, 2922, 2102, 1731, 1682, 1607, 1573, 1436, 1407, 1108, 1000, 810, 707, 560. HRMS: calcd. for C<sub>18</sub>H<sub>19</sub>N<sub>3</sub>O<sub>3</sub>Na<sup>+</sup> [M+ Na]<sup>+</sup>: 380.1039; Found: 380.1044.

**(4o) methyl-4-azido-4-(4-(tert-butyl)phenyl)-2-(2-(4-methoxyphenyl)-2-oxoethyl)butanoate**

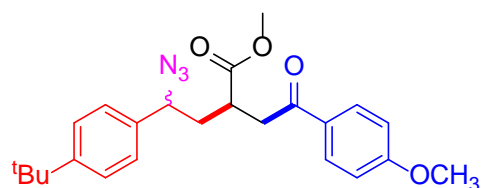

The title compound was prepared according to the general procedure described above by the reaction between 1-(*tert*-butyl)-4-vinylbenzene (**1o**), 4-methoxybenzaldehyde (**2c**), methyl acrylate (**3a**), with TBHP and TMSN<sub>3</sub>, and purified by flash column chromatography (ethyl ether/petroleum ether = 1:20, R<sub>f</sub> = 0.3) as pale yellow oil (59.3 mg, 70%).

<sup>1</sup>H NMR (400 MHz, CDCl<sub>3</sub>) δ 7.92 – 7.89 (m, 2H), 7.40 – 7.38 (m, 2H), 7.27 – 7.24 (m, 2H), 6.93 – 6.90 (m, 2H), 4.58 – 4.52 (m, 1H), 3.85 (s, 3H), 3.71 – 3.69 (m, 3H), 3.42 – 3.36 (m, 1H), 3.29 – 3.24 (m, 0.4×1H), 3.14 – 3.01 (m, 1.6×1H), 2.31 – 2.24 (m, 0.6×1H), 2.17 – 2.12 (m, 0.4×1H), 2.02 – 1.93 (m, 1H), 1.31 (s, 9H). <sup>13</sup>C NMR (100 MHz, CDCl<sub>3</sub>) δ 196.05, 195.97, 175.37, 175.34, 163.72, 151.58, 151.48, 136.26, 135.77, 130.36, 129.59, 129.57, 126.81, 126.58, 125.88, 125.84, 64.33, 64.10, 55.52, 52.07, 40.40, 40.12, 38.51, 38.10, 38.01, 37.96, 34.65, 31.33. IR (cm<sup>-1</sup>): 3056, 2962, 2841, 2096, 1713, 1680, 1600, 1575, 1511, 1462, 1438, 1110, 1030, 992, 831, 737, 703, 608, 572. HRMS: calcd. for C<sub>24</sub>H<sub>29</sub>N<sub>3</sub>O<sub>4</sub>Na<sup>+</sup> [M+ Na]<sup>+</sup>: 446.2050; Found: 446.2054.

**(5b) methyl-4-azido-2-(2-oxo-2-phenylethyl)-4-phenylbutanoate**

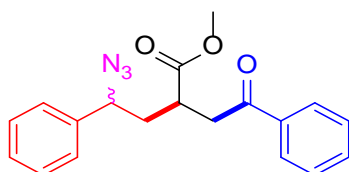

The title compound was prepared according to the general procedure described above by the reaction between styrene (**1a**), benzaldehyde (**2b**), methyl acrylate (**3a**), with TBHP and TMSN<sub>3</sub>, and purified by flash column chromatography (ethyl ether/petroleum ether = 1:30, R<sub>f</sub> = 0.3) as colorless oil (43.1 mg, 64%).

<sup>1</sup>H NMR (400 MHz, CDCl<sub>3</sub>) δ 7.94 – 7.91 (m, 2H), 7.58 – 7.54 (m, 1H), 7.47 – 7.42 (m, 2H), 7.40 – 7.31 (m, 5H), 4.62 – 4.56 (m, 1H), 3.71 – 3.70 (m, 3H), 3.48 – 3.42 (m, 1H), 3.32 – 3.26 (m,

0.4×1H), 3.20 – 3.03 (m, 1.6×1H), 2.32 – 2.25 (m, 0.6×1H), 2.20 – 2.13 (m, 0.4×1H), 2.02 – 1.94 (m, 1H). <sup>13</sup>C NMR (100 MHz, CDCl<sub>3</sub>) δ 197.52, 197.48, 175.17, 163.72, 139.33, 138.80, 136.51, 133.43, 129.04, 129.01, 128.72, 128.58, 128.10, 128.09, 127.16, 126.89, 64.65, 64.36, 52.13, 40.80, 40.44, 38.63, 38.03, 37.97, 37.89. IR (cm<sup>-1</sup>): 3062, 3030, 2951, 2099, 1732, 1686, 1597, 1493, 1449, 1219, 1168, 1001, 846, 757, 701, 560. HRMS: calcd. for C<sub>19</sub>H<sub>19</sub>N<sub>3</sub>O<sub>3</sub>Na<sup>+</sup> [M+ Na]<sup>+</sup>: 360.1319; Found: 360.1319.

**(5c) methyl-4-azido-2-(2-(4-methoxyphenyl)-2-oxoethyl)-4-phenylbutanoate**

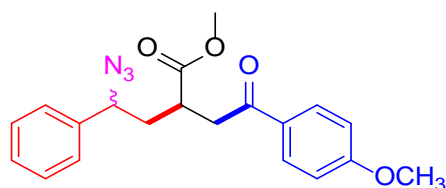

The title compound was prepared according to the general procedure described above by the reaction between styrene (**1a**), 4-methoxybenzaldehyde (**2c**), methyl acrylate (**3a**), with TBHP and TMSN<sub>3</sub>, and purified by flash column chromatography (ethyl ether/petroleum ether = 1:20, R<sub>f</sub> = 0.3) as colorless oil (47.7 mg, 65%).

<sup>1</sup>H NMR (400 MHz, CDCl<sub>3</sub>) δ 7.92 – 7.89 (m, 2H), 7.41 – 7.31 (m, 5H), 6.93 – 6.91 (m, 2H), 4.61 – 4.55 (m, 1H), 3.85 (s, 3H), 3.71 – 3.70 (m, 3H), 3.43 – 3.36 (m, 1H), 3.30 – 3.24 (m, 0.3×1H), 3.15 – 3.01 (m, 1.7×1H), 2.32 – 2.24 (m, 0.7×1H), 2.19 – 2.12 (m, 0.3×1H), 2.01 – 1.93 (m, 1H). <sup>13</sup>C NMR (100 MHz, CDCl<sub>3</sub>) δ 195.99, 195.95, 175.34, 163.77, 139.36, 138.83, 130.38, 129.59, 129.03, 128.99, 128.70, 128.56, 127.17, 126.89, 113.86, 64.65, 64.39, 55.56, 52.12, 40.47, 40.13, 38.66, 38.06, 37.95. IR (cm<sup>-1</sup>): 2951, 2841, 2099, 1732, 1677, 1600, 1575, 1420, 1362, 1169, 831, 760, 702, 610, 561, 526. HRMS: calcd. for C<sub>20</sub>H<sub>21</sub>N<sub>3</sub>O<sub>4</sub>Na<sup>+</sup> [M+ Na]<sup>+</sup>: 390.1424; Found: 390.1426.

**(5d) methyl-4-azido-2-(2-(4-(benzyloxy)phenyl)-2-oxoethyl)-4-phenylbutanoate**

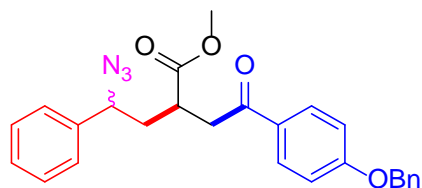

The title compound was prepared according to the general procedure described above by the reaction between styrene (**1a**), 4-(benzyloxy)benzaldehyde (**2d**), methyl acrylate (**3a**), with TBHP and TMSN<sub>3</sub>, and purified by flash column chromatography (ethyl ether/petroleum ether = 1:20, R<sub>f</sub> = 0.3) as colorless oil (56.7 mg, 64%).

<sup>1</sup>H NMR (400 MHz, CDCl<sub>3</sub>) δ 7.91 – 7.88 (m, 2H), 7.42 – 7.30 (m, 10H), 6.99 – 6.97 (m, 2H), 5.10 (s, 2H), 4.60 – 4.54 (m, 1H), 3.69 – 3.68 (m, 3H), 3.41 – 3.34 (m, 1H), 3.28 – 3.23 (m, 0.4×1H), 3.13 – 3.01 (m, 1.6×1H), 2.31 – 2.23 (m, 0.6×1H), 2.18 – 2.11 (m, 0.4×1H), 2.00 – 1.92

(m, 1H).  $^{13}\text{C}$  NMR (100 MHz,  $\text{CDCl}_3$ )  $\delta$  195.93, 195.89, 175.27, 162.86, 139.33, 138.81, 136.18, 130.37, 129.76, 129.00, 128.96, 128.75, 128.67, 128.53, 128.30, 127.51, 127.14, 126.87, 114.70, 70.18, 64.62, 64.35, 52.08, 40.44, 40.10, 38.61, 38.03, 37.92. IR ( $\text{cm}^{-1}$ ): 3063, 3032, 1950, 2098, 1731, 1681, 1600, 1575, 1509, 1455, 1114, 991, 916, 830, 739, 700, 649, 561. HRMS: calcd. for  $\text{C}_{26}\text{H}_{25}\text{N}_3\text{O}_4\text{Na}^+$   $[\text{M} + \text{Na}]^+$ : 466.1737; Found: 466.1739.

**(5e) methyl-4-azido-2-(2-(4-fluorophenyl)-2-oxoethyl)-4-phenylbutanoate**

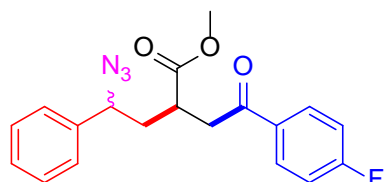

The title compound was prepared according to the general procedure described above by the reaction between styrene (**1a**), 4-fluorobenzaldehyde (**2e**), methyl acrylate (**3a**), with TBHP and  $\text{TMSN}_3$ , and purified by flash column chromatography (ethyl ether/petroleum ether = 1:30,  $R_f$  = 0.4) as colorless oil (45.4 mg, 64%).

$^1\text{H}$  NMR (400 MHz,  $\text{CDCl}_3$ )  $\delta$  7.98 – 7.94 (m, 2H), 7.40 – 7.31 (m, 5H), 7.15 – 7.10 (m, 2H), 4.62 – 4.56 (m, 1H), 3.72 – 3.71 (m, 3H), 3.46 – 3.40 (m, 1H), 3.32 – 3.26 (m, 0.4 $\times$ 1H), 3.17 – 3.02 (m, 1.6 $\times$ 1H), 2.32 – 2.25 (m, 0.6 $\times$ 1H), 2.19 – 2.12 (m, 0.4 $\times$ 1H), 2.01 – 1.93 (m, 1H).  $^{13}\text{C}$  NMR (100 MHz,  $\text{CDCl}_3$ )  $\delta$  196.01, 195.97, 175.20, 165.99 (d,  $J$  = 254.0 Hz), 139.39, 138.75, 132.92, 132.89, 132.79 (d,  $J$  = 9.3 Hz), 129.10, 129.06, 128.80, 128.66, 127.18, 126.90, 115.89 (d,  $J$  = 21.8 Hz), 64.65, 64.31, 52.26, 40.73, 40.34, 38.66, 38.06, 37.94, 37.87.  $^{19}\text{F}$  NMR (376 MHz,  $\text{CDCl}_3$ )  $\delta$  (-104.60, -104.63). IR ( $\text{cm}^{-1}$ ): 3064, 3032, 2952, 2470, 2096, 1731, 1682, 1597, 1507, 1437, 1410, 1100, 995, 833, 738, 701, 602, 560. HRMS: calcd. for  $\text{C}_{19}\text{H}_{18}\text{FN}_3\text{O}_3\text{Na}^+$   $[\text{M} + \text{Na}]^+$ : 378.1224; Found: 378.1225.

**(5f) methyl-4-azido-2-(2-(4-chlorophenyl)-2-oxoethyl)-4-phenylbutanoate**

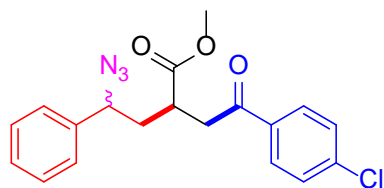

The title compound was prepared according to the general procedure described above by the reaction between styrene (**1a**), 4-chlorobenzaldehyde (**2f**), methyl acrylate (**3a**), with TBHP and  $\text{TMSN}_3$ , and purified by flash column chromatography (ethyl ether/petroleum ether = 1:30,  $R_f$  = 0.4) as colorless oil (40.9 mg, 55%).

$^1\text{H}$  NMR (400 MHz,  $\text{CDCl}_3$ )  $\delta$  7.88 – 7.85 (m, 2H), 7.44 – 7.31 (m, 7H), 4.62 – 4.55 (m, 1H), 3.71 – 3.70 (m, 3H), 3.45 – 3.38 (m, 1H), 3.32 – 3.25 (m, 0.4 $\times$ 1H), 3.15 – 3.02 (m, 1.6 $\times$ 1H), 2.32 – 2.25 (m, 0.6 $\times$ 1H), 2.19 – 2.12 (m, 0.4 $\times$ 1H), 2.01 – 1.93 (m, 1H).  $^{13}\text{C}$  NMR (100 MHz,  $\text{CDCl}_3$ )  $\delta$



196.40, 196.36, 175.12, 139.93, 139.24, 138.71, 134.73, 129.54, 129.52, 129.08, 129.06, 128.79, 128.64, 127.15, 126.87, 64.60, 64.26, 52.25, 40.74, 40.34, 38.60, 38.01, 37.88, 37.82. IR (cm<sup>-1</sup>): 3031, 2951, 3923, 2099, 1732, 1687, 1589, 1490, 1437, 1401, 1217, 1169, 1092, 994, 820, 762, 701, 527. HRMS: calcd. for C<sub>19</sub>H<sub>18</sub>ClN<sub>3</sub>O<sub>3</sub>Na<sup>+</sup> [M+ Na]<sup>+</sup>: 394.0929; Found: 394.0932.

**(5g) methyl-4-azido-2-(2-(4-bromophenyl)-2-oxoethyl)-4-phenylbutanoate**

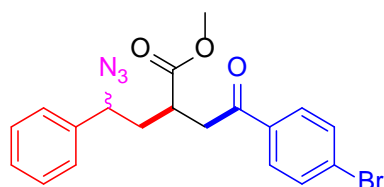

The title compound was prepared according to the general procedure described above by the reaction between styrene (**1a**), 4-bromobenzaldehyde (**2g**), methyl acrylate (**3a**), with TBHP and TMSN<sub>3</sub>, and purified by flash column chromatography (ethyl ether/petroleum ether = 1:30, R<sub>f</sub> = 0.4) as colorless oil (39.8 mg, 48%).

<sup>1</sup>H NMR (400 MHz, CDCl<sub>3</sub>) δ 7.80 – 7.77 (m, 2H), 7.61 – 7.58 (m, 2H), 7.42 – 7.31 (m, 5H), 4.61 – 4.55 (m, 1H), 3.72 – 3.71 (m, 3H), 3.45 – 3.38 (m, 1H), 3.32 – 3.25 (m, 0.4×1H), 3.15 – 3.02 (m, 1.6×1H), 2.32 – 2.24 (m, 0.6×1H), 2.19 – 2.12 (m, 0.4×1H), 2.01 – 1.93 (m, 1H). <sup>13</sup>C NMR (100 MHz, CDCl<sub>3</sub>) δ 196.63, 175.13, 139.26, 138.73, 135.16, 132.09, 129.65, 129.11, 129.09, 128.82, 128.72, 128.67, 127.17, 126.90, 64.63, 64.29, 52.29, 40.75, 40.35, 38.63, 38.04, 37.90, 37.84. IR (cm<sup>-1</sup>): 3031, 2951, 2923, 2099, 1734, 1686, 1585, 1437, 1398, 1217, 1169, 1070, 1009, 816, 763, 701. HRMS: calcd. for C<sub>19</sub>H<sub>18</sub>BrN<sub>3</sub>O<sub>3</sub>Na<sup>+</sup> [M+ Na]<sup>+</sup>: 438.0424; Found: 438.0425.

**(5h) methyl-4-azido-2-(2-(4-cyanophenyl)-2-oxoethyl)-4-phenylbutanoate**

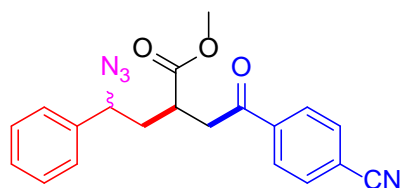

The title compound was prepared according to the general procedure described above by the reaction between styrene (**1a**), 4-formylbenzotrile (**2h**), methyl acrylate (**3a**), with TBHP and TMSN<sub>3</sub>, and purified by flash column chromatography (ethyl ether/petroleum ether = 1:20, R<sub>f</sub> = 0.3) as colorless oil (18.1 mg, 25%).

<sup>1</sup>H NMR (400 MHz, CDCl<sub>3</sub>) δ 8.03 – 8.00 (m, 2H), 7.79 – 7.60 (m, 2H), 7.43 – 7.31 (m, 5H), 4.63 – 4.56 (m, 1H), 3.73 – 3.72 (m, 3H), 3.51 – 3.44 (m, 1H), 3.33 – 3.30 (m, 0.5×1H), 3.18 – 3.05 (m, 1.5×1H), 2.33 – 2.26 (m, 0.5×1H), 2.20 – 2.13 (m, 0.5×1H), 2.02 – 1.94 (m, 1H). <sup>13</sup>C NMR (100 MHz, CDCl<sub>3</sub>) δ 196.44, 196.39, 174.89, 139.34, 139.15, 138.63, 132.66, 129.13, 129.10, 128.86, 128.73, 128.55, 127.13, 126.86, 117.96, 116.70, 64.60, 64.18, 52.35, 41.01, 40.54, 38.55, 37.95, 37.81. IR (cm<sup>-1</sup>): 3031, 2952, 2230, 2100, 1732, 1693, 1606, 1493, 1437, 1403, 1216,

1169, 1108, 955, 828, 738, 720, 569. HRMS: calcd. for  $C_{20}H_{19}N_4O_3Na^+$   $[M+Na]^+$ : 385.1271; Found: 385.1274.

**(5i) methyl 4-(5-azido-3-(methoxycarbonyl)-5-phenylpentanoyl)benzoate**

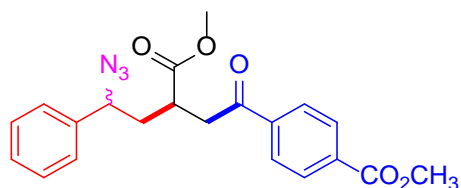

The title compound was prepared according to the general procedure described above by the reaction between styrene (**1a**), methyl 4-formylbenzoate (**2i**), methyl acrylate (**3a**), with TBHP and  $TMSN_3$ , and purified by flash column chromatography (ethyl ether/petroleum ether = 1:20,  $R_f$  = 0.3) as colorless oil (27.7 mg, 35%).

$^1H$  NMR (400 MHz,  $CDCl_3$ )  $\delta$  8.13 – 8.10 (m, 2H), 7.99 – 7.96 (m, 2H), 7.40 – 7.32 (m, 5H), 4.63 – 4.57 (m, 1H), 3.94 (s, 3H), 3.72 – 3.71 (m, 3H), 3.54 – 3.45 (m, 1H), 3.34 – 3.27 (m, 0.4×1H), 3.22 – 3.04 (m, 1.6×1H), 2.34 – 2.26 (m, 0.6×1H), 2.20 – 2.13 (m, 0.4×1H), 2.03 – 1.94 (m, 1H).  $^{13}C$  NMR (100 MHz,  $CDCl_3$ )  $\delta$  197.14, 197.09, 175.02, 166.19, 139.55, 139.19, 138.67, 134.14, 129.92, 129.05, 129.02, 128.76, 128.62, 128.01, 127.12, 126.84, 64.55, 64.21, 52.56, 52.23, 41.08, 40.66, 38.55, 37.96, 37.82, 37.76. IR ( $cm^{-1}$ ): 3031, 2952, 2100, 1727, 1690, 1503, 1436, 1407, 1281, 1109, 995, 956, 839, 801, 701, 560, 528. HRMS: calcd. for  $C_{21}H_{21}N_3O_5Na^+$   $[M+Na]^+$ : 418.1373; Found: 418.1374.

**(5j) methyl 4-azido-2-(2-(3-chlorophenyl)-2-oxoethyl)-4-phenylbutanoate**

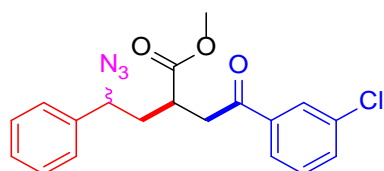

The title compound was prepared according to the general procedure described above by the reaction between styrene (**1a**), 3-chlorobenzaldehyde (**2j**), methyl acrylate (**3a**), with TBHP and  $TMSN_3$ , and purified by flash column chromatography (ethyl ether/petroleum ether = 1:30,  $R_f$  = 0.3) as colorless oil (39.3 mg, 53%).

$^1H$  NMR (400 MHz,  $CDCl_3$ )  $\delta$  7.90 – 7.89 (m, 1H), 7.82 – 7.79 (m, 1H), 7.56 – 7.53 (m, 1H), 7.43 – 7.31 (m, 6H), 4.62 – 4.56 (m, 1H), 3.72 – 3.71 (m, 3H), 3.46 – 3.39 (m, 1H), 3.31 – 3.26 (m, 0.3×1H), 3.16 – 3.03 (m, 1.7×1H), 2.33 – 2.25 (m, 0.7×1H), 2.19 – 2.12 (m, 0.3×1H), 2.01 – 1.93 (m, 1H).  $^{13}C$  NMR (100 MHz,  $CDCl_3$ )  $\delta$  196.37, 196.33, 175.01, 139.26, 138.74, 138.01, 135.11, 133.39, 130.11, 129.11, 129.08, 128.82, 128.68, 128.29, 128.27, 127.18, 126.91, 126.20, 64.64, 64.29, 52.25, 40.87, 40.46, 38.59, 38.00, 37.88, 37.83. IR ( $cm^{-1}$ ): 3065, 3031, 2951, 2099, 1732, 1692, 1572, 1436, 1214, 1169, 998, 787, 763, 701, 682, 526. HRMS: calcd. for  $C_{19}H_{18}ClN_3O_3Na^+$   $[M+Na]^+$ : 394.0929; Found: 394.0929.

**(5k) methyl-4-azido-2-(2-(3,5-difluorophenyl)-2-oxoethyl)-4-phenylbutanoate**

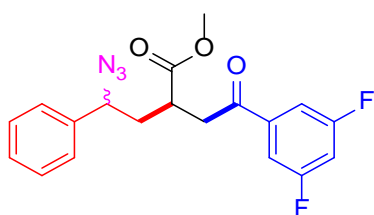

The title compound was prepared according to the general procedure described above by the reaction between styrene (**1a**), 3,5-difluorobenzaldehyde (**2k**), methyl acrylate (**3a**), with TBHP and TMSN<sub>3</sub>, and purified by flash column chromatography (ethyl ether/petroleum ether = 1:30, R<sub>f</sub> = 0.3) as colorless oil (43.3 mg, 58%).

<sup>1</sup>H NMR (400 MHz, CDCl<sub>3</sub>) δ 7.44 – 7.31 (m, 7H), 7.04 – 7.00 (m, 1H), 4.62 – 4.56 (m, 1H), 3.72 – 3.71 (m, 3H), 3.44 – 3.37 (m, 1H), 3.32 – 3.27 (m, 0.4×1H), 3.12 – 3.01 (m, 1.6×1H), 2.32 – 2.25 (m, 0.6×1H), 2.19 – 2.12 (m, 0.4×1H), 2.01 – 1.92 (m, 1H). <sup>13</sup>C NMR (100 MHz, CDCl<sub>3</sub>) δ 195.19, 195.15, 174.85, 174.84, 163.18 (d, *J* = 249.7 Hz), 163.06 (d, *J* = 249.6 Hz), 139.18, 138.66, 139.29 (t, *J* = 7.5 Hz), 129.12, 129.09, 128.84, 128.70, 127.15, 126.87, 111.12 (d, *J* = 11.6 Hz), 111.11 (d, *J* = 25.9 Hz), 108.75 (t, *J* = 25.2 Hz), 64.59, 64.20, 52.29, 40.89, 40.43, 38.52, 37.94, 37.80, 37.79. <sup>19</sup>F NMR (376 MHz, CDCl<sub>3</sub>) δ (-107.77, -107.78). IR (cm<sup>-1</sup>): 3067, 3035, 2953, 2470, 2092, 1734, 1685, 1598, 1509, 1439, 1415, 1100, 992, 843, 744, 705, 600, 555. HRMS: calcd. for C<sub>19</sub>H<sub>17</sub>F<sub>2</sub>N<sub>3</sub>O<sub>3</sub>Na<sup>+</sup> [M+ Na]<sup>+</sup>: 396.1130; Found: 396.1150.

**(5l) methyl-4-azido-2-(2-(3,4-dichlorophenyl)-2-oxoethyl)-4-phenylbutanoate**

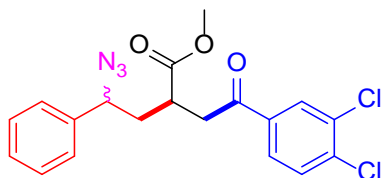

The title compound was prepared according to the general procedure described above by the reaction between styrene (**1a**), 3,4-dichlorobenzaldehyde (**2l**), methyl acrylate (**3a**), with TBHP and TMSN<sub>3</sub>, and purified by flash column chromatography (ethyl ether/petroleum ether = 1:30, R<sub>f</sub> = 0.3) as colorless oil (46.1 mg, 54%).

<sup>1</sup>H NMR (400 MHz, CDCl<sub>3</sub>) δ 8.00 – 7.99 (m, 1H), 7.76 – 7.73 (m, 1H), 7.55 – 7.53 (m, 1H), 7.43 – 7.31 (m, 5H), 4.62 – 4.56 (m, 1H), 3.72 – 3.71 (m, 3H), 3.44 – 3.37 (m, 1H), 3.32 – 3.25 (m, 0.4×1H), 3.13 – 3.02 (m, 1.6×1H), 2.32 – 2.25 (m, 0.6×1H), 2.19 – 2.12 (m, 0.4×1H), 2.01 – 1.92 (m, 1H). <sup>13</sup>C NMR (100 MHz, CDCl<sub>3</sub>) δ 195.47, 195.43, 174.93, 139.19, 138.67, 138.08, 135.96, 133.47, 130.90, 130.18, 130.16, 129.12, 129.09, 128.84, 128.71, 127.16, 126.89, 64.60, 64.22, 52.31, 40.74, 40.30, 38.55, 37.97, 37.84, 37.80. IR (cm<sup>-1</sup>): 3068, 3036, 2958, 2095, 1736, 1697, 1572, 1439, 1214, 1175, 998, 785, 767, 705, 687, 528. HRMS: calcd. for C<sub>19</sub>H<sub>17</sub>Cl<sub>2</sub>N<sub>3</sub>O<sub>3</sub>Na<sup>+</sup> [M+ Na]<sup>+</sup>: 428.0539; Found: 428.0559.

**(5m) methyl-4-azido-2-(2-(3,5-dimethoxyphenyl)-2-oxoethyl)-4-phenylbutanoate**

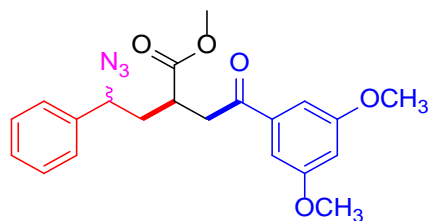

The title compound was prepared according to the general procedure described above by the reaction between styrene (**1a**), 3,5-dimethoxybenzaldehyde (**2m**), methyl acrylate (**3a**), with TBHP and TMSN<sub>3</sub>, and purified by flash column chromatography (ethyl ether/petroleum ether = 1:10, R<sub>f</sub> = 0.4) as colorless oil (50.0 mg, 63%).

<sup>1</sup>H NMR (400 MHz, CDCl<sub>3</sub>) δ 7.40 – 7.31 (m, 5H), 7.07 – 7.05 (m, 2H), 6.65 (s, 1H), 4.61 – 4.55 (m, 1H), 3.82 – 3.81 (m, 6H), 3.72 – 3.71 (m, 3H), 3.44 – 3.37 (m, 1H), 3.29 – 3.25 (m, 0.4×1H), 3.16 – 3.01 (m, 1.6×1H), 2.32 – 2.24 (m, 0.6×1H), 2.19 – 2.11 (m, 0.4×1H), 2.00 – 1.92 (m, 1H). <sup>13</sup>C NMR (100 MHz, CDCl<sub>3</sub>) δ 197.27, 197.23, 175.21, 160.99, 139.34, 138.81, 138.37, 129.09, 129.05, 128.78, 128.63, 127.20, 126.92, 105.93, 105.76, 64.65, 64.36, 55.72, 52.22, 40.96, 40.58, 38.65, 38.02, 37.91. IR (cm<sup>-1</sup>): 2955, 2846, 2099, 1732, 1679, 1605, 1576, 1428, 1368, 1162, 826, 755, 708, 615, 557, 524. HRMS: calcd. for C<sub>21</sub>H<sub>23</sub>N<sub>3</sub>O<sub>5</sub>Na<sup>+</sup> [M+ Na]<sup>+</sup>:420.1530; Found:420.1547.

**(5n) methyl-4-azido-2-(2-(furan-2-yl)-2-oxoethyl)-4-phenylbutanoate**

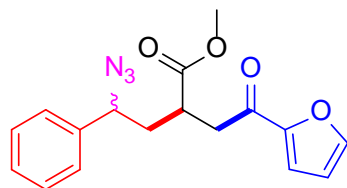

The title compound was prepared according to the general procedure described above by the reaction between styrene (**1a**), furan-2-carbaldehyde (**2n**), methyl acrylate (**3a**), with TBHP and TMSN<sub>3</sub>, and purified by flash column chromatography (ethyl ether/petroleum ether = 1:25, R<sub>f</sub> = 0.3) as brown oil (26.2 mg, 40%).

<sup>1</sup>H NMR (400 MHz, CDCl<sub>3</sub>) δ 7.58 (s, 1H), 7.40 – 7.31 (m, 5H), 7.20 – 7.19 (m, 1H), 6.54 – 6.53 (m, 1H), 4.60 – 4.55 (m, 1H), 3.71 – 3.70 (m, 3H), 3.34 – 3.22 (m, 1.5×1H), 3.08 – 2.99 (m, 1.5×1H), 2.31 – 2.23 (m, 0.5×1H), 2.18 – 2.11 (m, 0.5×1H), 2.01 – 1.91 (m, 1H). <sup>13</sup>C NMR (100 MHz, CDCl<sub>3</sub>) δ 186.64, 174.96, 152.39, 146.60, 139.23, 138.72, 129.06, 129.02, 128.75, 128.61, 127.16, 126.90, 117.35, 112.47, 64.51, 64.27, 52.22, 40.39, 40.00, 38.51, 37.95, 37.61, 37.52. IR (cm<sup>-1</sup>): 3134, 3031, 2952, 2100, 1733, 1677, 1569, 1469, 1396, 1234, 1165, 1018, 883, 763, 702, 595. HRMS: calcd. for C<sub>17</sub>H<sub>17</sub>N<sub>3</sub>O<sub>4</sub>Na<sup>+</sup> [M+ Na]<sup>+</sup>: 350.1111; Found: 350.1111.

**(5o) methyl-4-azido-2-(2-oxo-2-(thiophen-2-yl)ethyl)-4-phenylbutanoate**

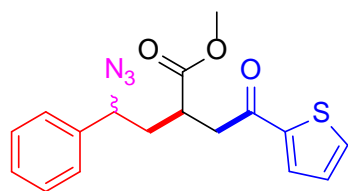

The title compound was prepared according to the general procedure described above by the reaction between styrene (**1a**), thiophene-2-carbaldehyde (**2o**), methyl acrylate (**3a**), with TBHP and TMSN<sub>3</sub>, and purified by flash column chromatography (ethyl ether/petroleum ether = 1:25, R<sub>f</sub> = 0.3) as brown oil (33.0 mg, 48%).

<sup>1</sup>H NMR (400 MHz, CDCl<sub>3</sub>) δ 7.71 – 7.70 (m, 1H), 7.64 – 7.63 (m, 1H), 7.41 – 7.31 (m, 5H), 7.13 – 7.11 (m, 1H), 4.61 – 4.55 (m, 1H), 3.71 – 3.70 (m, 3H), 3.40 – 3.33 (m, 1H), 3.31 – 3.24 (m, 0.4×1H), 3.14 – 3.02 (m, 1.6×1H), 2.32 – 2.25 (m, 0.6×1H), 2.19 – 2.12 (m, 0.4×1H), 2.02 – 1.94 (m, 1H). <sup>13</sup>C NMR (100 MHz, CDCl<sub>3</sub>) δ 190.34, 174.96, 143.62, 139.26, 138.73, 134.02, 132.19, 129.06, 129.02, 128.76, 128.61, 128.25, 127.16, 126.91, 64.58, 64.34, 52.20, 41.29, 40.93, 38.54, 38.08, 37.96, 37.94. IR (cm<sup>-1</sup>): 3030, 2951, 2099, 1732, 1662, 1558, 1416, 1355, 1224, 1168, 1058, 857, 728, 702, 581, 559. HRMS: calcd. for C<sub>17</sub>H<sub>17</sub>N<sub>3</sub>O<sub>3</sub>SNa<sup>+</sup> [M+ Na]<sup>+</sup>: 366.0883; Found: 366.0883.

**(5p) methyl-4-azido-2-(2-(1-methyl-1H-pyrrol-2-yl)-2-oxoethyl)-4-phenylbutanoate**

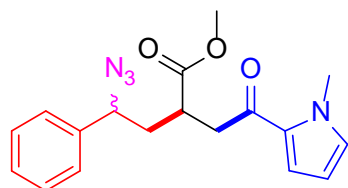

The title compound was prepared according to the general procedure described above by the reaction between styrene (**1a**), 1-methyl-1H-pyrrole-2-carbaldehyde (**2p**), methyl acrylate (**3a**), with TBHP and TMSN<sub>3</sub>, and purified by flash column chromatography (ethyl ether/petroleum ether = 1:20, R<sub>f</sub> = 0.3) as sepia oil (24.5 mg, 36%).

<sup>1</sup>H NMR (400 MHz, CDCl<sub>3</sub>) δ 7.40 – 7.31 (m, 5H), 6.95 – 6.93 (m, 1H), 6.80 – 6.79 (m, 1H), 6.12 – 6.10 (m, 1H), 4.60 – 4.53 (m, 1H), 3.90 – 3.88 (m, 3H), 3.71 – 3.70 (m, 3H), 3.28 – 3.20 (m, 1.4×1H), 3.04 – 2.95 (m, 1.6×1H), 2.31 – 2.23 (m, 0.6×1H), 2.15 – 2.09 (m, 0.4×1H), 1.97 – 1.88 (m, 1H). <sup>13</sup>C NMR (100 MHz, CDCl<sub>3</sub>) δ 187.85, 187.81, 175.43, 139.40, 138.86, 131.31, 130.22, 130.21, 129.00, 128.95, 128.67, 128.51, 127.15, 126.88, 119.28, 108.18, 64.61, 64.38, 52.11, 40.96, 40.63, 38.63, 38.17, 38.07, 38.01, 37.75, 37.73. IR (cm<sup>-1</sup>): 3109, 3062, 3030, 2951, 2099, 1731, 1651, 1527, 1409, 1316, 1243, 1064, 957, 743, 702, 607, 559, 528. HRMS: calcd. for C<sub>18</sub>H<sub>20</sub>N<sub>4</sub>O<sub>3</sub>Na<sup>+</sup> [M+ Na]<sup>+</sup>: 363.1428; Found: 363.1427.

**(5q) methyl-4-azido-2-(2-(naphthalen-2-yl)-2-oxoethyl)-4-phenylbutanoate**

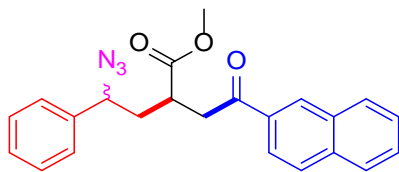

The title compound was prepared according to the general procedure described above by the reaction between styrene (**1a**), 2-naphthaldehyde (**2q**), methyl acrylate (**3a**), with TBHP and  $\text{TMSN}_3$ , and purified by flash column chromatography (ethyl ether/petroleum ether = 1:25,  $R_f$  = 0.3) as colorless oil (52.6 mg, 68%).

$^1\text{H}$  NMR (400 MHz,  $\text{CDCl}_3$ )  $\delta$  8.43 (s, 1H), 8.00 – 7.92 (m, 2H), 7.87 – 7.84 (m, 2H), 7.60 – 7.51 (m, 2H), 7.41 – 7.31 (m, 5H), 4.65 – 4.59 (m, 1H), 3.73 – 3.71 (m, 3H), 3.61 – 3.55 (m, 1H), 3.38 – 3.22 (m, 1.5 $\times$ 1H), 3.15 – 3.08 (m, 0.5 $\times$ 1H), 2.36 – 2.29 (m, 0.5 $\times$ 1H), 2.23 – 2.16 (m, 0.5 $\times$ 1H), 2.07 – 1.98 (m, 1H).  $^{13}\text{C}$  NMR (100 MHz,  $\text{CDCl}_3$ )  $\delta$  197.44, 197.40, 175.27, 139.29, 138.77, 135.72, 133.73, 132.47, 129.87, 129.63, 129.04, 129.00, 128.72, 128.68, 128.58, 127.85, 127.16, 126.93, 126.89, 123.71, 123.68, 64.61, 64.33, 52.19, 40.83, 40.48, 38.64, 38.06, 38.03, 37.92. IR ( $\text{cm}^{-1}$ ): 3060, 3031, 2950, 2098, 1732, 1681, 1627, 1436, 1360, 1168, 1124, 1027, 942, 822, 749, 701, 477. HRMS: calcd. for  $\text{C}_{23}\text{H}_{21}\text{N}_3\text{O}_3\text{Na}^+$  [ $\text{M} + \text{Na}$ ] $^+$ : 410.1475; Found: 410.1475.

**(5r) methyl-4-azido-2-(2-cyclohexyl-2-oxoethyl)-4-phenylbutanoate**

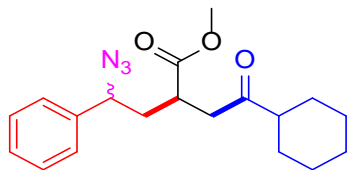

The title compound was prepared according to the general procedure described above by the reaction between styrene (**1a**), cyclohexanecarbaldehyde (**2r**), methyl acrylate (**3a**), with TBHP and  $\text{TMSN}_3$ , and purified by flash column chromatography (ethyl ether/petroleum ether = 1:40,  $R_f$  = 0.4) as colorless oil (37.1 mg, 54%).

$^1\text{H}$  NMR (400 MHz,  $\text{CDCl}_3$ )  $\delta$  7.42 – 7.29 (m, 5H), 4.55 – 4.48 (m, 1H), 3.69 – 3.68 (m, 3H), 3.11 – 3.06 (m, 0.4 $\times$ 1H), 2.91 – 2.87 (m, 1.6 $\times$ 1H), 2.64 – 2.58 (m, 1H), 2.35 – 2.27 (m, 1H), 2.21 – 2.14 (m, 0.6 $\times$ 1H), 2.08 – 2.01 (m, 0.4 $\times$ 1H), 1.89 – 1.76 (m, 5H), 1.33 – 1.17 (m, 6H).  $^{13}\text{C}$  NMR (100 MHz,  $\text{CDCl}_3$ )  $\delta$  211.51, 211.46, 175.24, 139.36, 138.83, 129.07, 129.03, 128.75, 128.60, 127.17, 126.89, 64.64, 64.37, 52.12, 50.82, 50.78, 42.59, 42.19, 38.58, 37.96, 37.62, 37.54, 28.49, 25.91, 25.69. IR ( $\text{cm}^{-1}$ ): 2925, 2847, 2097, 1738, 1448, 1686, 1597, 1448, 1240, 816, 756, 691. HRMS: calcd. for  $\text{C}_{19}\text{H}_{25}\text{N}_3\text{O}_3\text{Na}^+$  [ $\text{M} + \text{Na}$ ] $^+$ : 366.1969; Found: 366.1787.

**(5r) methyl (E)-2-(2-azido-2-phenylethyl)-4-oxohept-5-enoate**

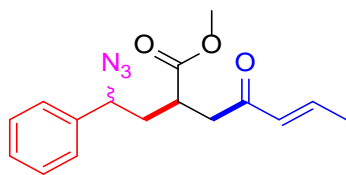

The title compound was prepared according to the general procedure described above by the reaction between styrene (**1a**), (E)-but-2-enal (**2r**), methyl acrylate (**3a**), with TBHP and TMSN<sub>3</sub>, and purified by flash column chromatography (ethyl ether/petroleum ether = 1:40, R<sub>f</sub> = 0.4) as colorless oil (28.4 mg, 44%).

<sup>1</sup>H NMR (400 MHz, CDCl<sub>3</sub>) δ 7.41 – 7.29 (m, 5H), 6.91 – 6.81 (m, 1H), 6.13 – 6.07 (m, 1H), 4.56 – 4.50 (m, 1H), 3.70 – 3.69 (m, 3H), 3.17 – 3.11 (m, 0.5×1H), 3.03 – 2.97 (m, 1H), 2.94 – 2.88 (m, 0.5×1H), 2.76 – 2.67 (m, 1H), 2.24 – 2.17 (m, 0.5×1H), 2.11 – 2.04 (m, 0.5×1H), 1.93 – 1.84 (m, 4H). <sup>13</sup>C NMR (100 MHz, CDCl<sub>3</sub>) δ 197.33, 197.31, 175.20, 143.59, 139.29, 138.76, 129.01, 128.97, 128.69, 128.55, 127.13, 126.86, 64.52, 64.28, 52.12, 38.51, 37.93, 37.71, 37.61, 18.41. IR (cm<sup>-1</sup>): 2925, 2848, 2098, 1732, 1688, 1630, 1448, 1335, 1266, 1210, 1035, 1008, 893, 756, 688. HRMS: calcd. for C<sub>16</sub>H<sub>19</sub>N<sub>3</sub>O<sub>3</sub>Na<sup>+</sup> [M+ Na]<sup>+</sup>: 324.1319; Found: 324.1331.

**(6b) cyclohexyl-4-azido-2-[2-oxo-2-(p-tolyl)ethyl]-4-phenylbutanoate**

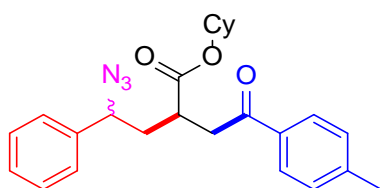

The title compound was prepared according to the general procedure described above by the reaction between styrene (**1a**), 4-methylbenzaldehyde (**2a**), cyclohexyl acrylate (**3b**), with TBHP and TMSN<sub>3</sub>, and purified by flash column chromatography (ethyl ether/petroleum ether = 1:30, R<sub>f</sub> = 0.4) as colorless oil (53.5 mg, 64%).

<sup>1</sup>H NMR (400 MHz, CDCl<sub>3</sub>) δ 7.84 – 7.81 (m, 2H), 7.41 – 7.30 (m, 5H), 7.26 – 7.23 (m, 2H), 4.85 – 4.77 (m, 1H), 4.66 – 4.57 (m, 1H), 3.43 – 3.36 (m, 1H), 3.30 – 3.23 (m, 0.3×1H), 3.14 – 3.04 (m, 1H), 3.00 – 2.93 (m, 0.7×1H), 2.40 (s, 3H), 2.32 – 2.24 (m, 0.7×1H), 2.16 – 2.09 (m, 0.3×1H), 1.99 – 1.92 (m, 1H), 1.87 – 1.84 (m, 2H), 1.72 – 1.70 (m, 2H), 1.54 – 1.51 (m, 1H), 1.48 – 1.31 (m, 4H), 1.29 – 1.21 (m, 1H). <sup>13</sup>C NMR (100 MHz, CDCl<sub>3</sub>) δ 197.19, 197.17, 174.14, 144.15, 139.65, 138.82, 134.12, 129.34, 128.99, 128.96, 128.65, 128.46, 128.19, 128.17, 127.20, 126.76, 73.20, 64.66, 64.34, 40.73, 40.45, 38.98, 38.31, 38.19, 38.02, 31.69, 31.60, 31.53, 31.51, 25.39, 23.79, 23.75, 21.71. IR (cm<sup>-1</sup>): 3086, 3031, 2937, 2859, 2098, 1724, 1683, 1607, 1453, 1222, 1179, 1015, 811, 701, 559. HRMS: calcd. for C<sub>25</sub>H<sub>29</sub>N<sub>3</sub>O<sub>3</sub>Na<sup>+</sup> [M+ Na]<sup>+</sup>: 442.2101; Found: 442.2100.

**(6c) benzyl-4-azido-2-[2-oxo-2-(p-tolyl)ethyl]-4-phenylbutanoate**

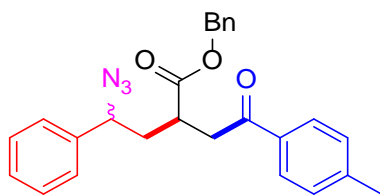

The title compound was prepared according to the general procedure described above by the reaction between styrene (**1a**), 4-methylbenzaldehyde (**2a**), benzyl acrylate (**3c**), with TBHP and  $\text{TMSN}_3$ , and purified by flash column chromatography (ethyl ether/petroleum ether = 1:30,  $R_f$  = 0.4) as colorless oil (51.2 mg, 60%).

$^1\text{H}$  NMR (400 MHz,  $\text{CDCl}_3$ )  $\delta$  7.83 – 7.80 (m, 2H), 7.37 – 7.30 (m, 8H), 7.25 – 7.18 (m, 4H), 5.23 – 5.10 (m, 2H), 4.53 – 4.46 (m, 1H), 3.45 – 3.30 (m, 1.4×1H), 3.16 – 3.03 (m, 1.6×1H), 2.40 (s, 3H), 2.32 – 2.24 (m, 0.6×1H), 2.16 – 2.09 (m, 0.4×1H), 2.00 – 1.92 (m, 1H).  $^{13}\text{C}$  NMR (100 MHz,  $\text{CDCl}_3$ )  $\delta$  197.10, 174.66, 174.64, 144.32, 144.30, 129.42, 129.02, 128.97, 128.71, 128.68, 128.61, 128.53, 128.49, 128.42, 128.41, 128.26, 128.24, 127.22, 126.83, 66.83, 66.78, 64.41, 64.28, 40.71, 40.37, 38.94, 38.14, 37.97, 21.78. IR ( $\text{cm}^{-1}$ ): 3063, 3032, 2952, 2922, 2098, 1731, 1682, 1607, 1495, 1455, 1252, 1162, 1002, 809, 751, 699. HRMS: calcd. for  $\text{C}_{26}\text{H}_{25}\text{N}_3\text{O}_3\text{Na}^+$   $[\text{M} + \text{Na}]^+$ : 450.1788; Found: 450.1785.

**(6d) 4-hydroxybutyl-4-azido-2-[2-oxo-2-(p-tolyl)ethyl]-4-phenylbutanoate**

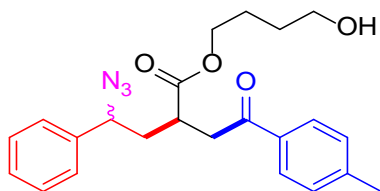

The title compound was prepared according to the general procedure described above by the reaction between styrene (**1a**), 4-methylbenzaldehyde (**2a**), 4-hydroxybutyl acrylate (**3d**), with TBHP and  $\text{TMSN}_3$ , and purified by flash column chromatography (ethyl ether/petroleum ether = 1:10,  $R_f$  = 0.3) as colorless oil (42.5 mg, 52%).

$^1\text{H}$  NMR (400 MHz,  $\text{CDCl}_3$ )  $\delta$  7.84 – 7.80 (m, 2H), 7.41 – 7.31 (m, 5H), 7.26 – 7.23 (m, 2H), 4.63 – 4.56 (m, 1H), 4.21 – 4.15 (m, 1H), 4.13 – 4.07 (m, 1H), 3.66 – 3.63 (m, 2H), 3.45 – 3.38 (m, 1H), 3.29 – 3.23 (m, 0.5×1H), 3.17 – 3.07 (m, 1H), 3.05 – 2.98 (m, 0.5×1H), 2.40 (s, 3H), 2.32 – 2.25 (m, 0.5×1H), 2.18 – 2.11 (m, 0.5×1H), 2.00 – 1.92 (m, 2H), 1.76 – 1.70 (m, 2H), 1.65 – 1.57 (m, 2H).  $^{13}\text{C}$  NMR (100 MHz,  $\text{CDCl}_3$ )  $\delta$  197.35, 197.33, 174.85, 144.36, 139.34, 138.76, 133.92, 129.39, 129.02, 128.98, 128.70, 128.55, 128.20, 128.18, 127.14, 126.82, 64.82, 64.59, 64.29, 62.23, 40.73, 40.34, 38.71, 38.12, 38.01, 37.98, 29.13, 25.07, 25.05, 21.72. IR ( $\text{cm}^{-1}$ ): 3440, 3060, 3032, 2947, 2480, 2096, 1731, 1681, 1606, 1493, 1039, 810, 737, 701, 560. HRMS: calcd. for  $\text{C}_{26}\text{H}_{25}\text{N}_3\text{O}_3\text{Na}^+$   $[\text{M} + \text{Na}]^+$ : 432.1894; Found: 432.1896.

**(6e) 2,2,2-trifluoroethyl-4-azido-2-(2-oxo-2-(p-tolyl)ethyl)-4-phenylbutanoate**



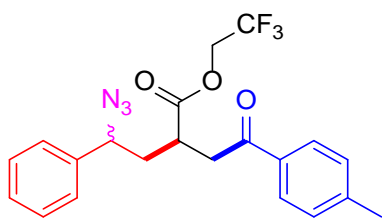

The title compound was prepared according to the general procedure described above by the reaction between styrene (**1a**), 4-methylbenzaldehyde (**2a**), 2,2,2-trifluoroethyl acrylate (**3e**), with TBHP and TMSN<sub>3</sub>, and purified by flash column chromatography (ethyl ether/petroleum ether = 1:30, R<sub>f</sub> = 0.4) as colorless oil (52.9 mg, 63%).

<sup>1</sup>H NMR (400 MHz, CDCl<sub>3</sub>) δ 7.84 – 7.80 (m, 2H), 7.42 – 7.30 (m, 5H), 7.26 – 7.24 (m, 2H), 4.65 – 4.53 (m, 2H), 4.49 – 4.38 (m, 1H), 3.48 – 3.40 (m, 1H), 3.37 – 3.34 (m, 0.4×1H), 3.25 – 3.15 (m, 1H), 3.12 – 3.08 (m, 0.6×1H), 2.40 (s, 3H), 2.33 – 2.26 (m, 0.6×1H), 2.18 – 2.11 (m, 0.4×1H), 2.03 – 1.95 (m, 1H). <sup>13</sup>C NMR (100 MHz, CDCl<sub>3</sub>) δ 196.73, 196.69, 173.37, 173.30, 144.56, 139.12, 138.46, 133.70, 129.46, 129.12, 129.07, 128.85, 128.68, 128.21, 128.18, 127.14, 126.81, 123.06 (d, *J* = 275.5 Hz), 64.34, 64.11, 60.62 (q, *J* = 36.3 Hz), 60.52 (q, *J* = 36.3 Hz), 40.59, 40.23, 38.59, 37.81, 37.73, 37.59, 21.73. <sup>19</sup>F NMR (376 MHz, CDCl<sub>3</sub>) δ (-73.49, -73.51). IR (cm<sup>-1</sup>): 3059, 3032, 2955, 2923, 1734, 1686, 1635, 1602, 1573, 1450, 1334, 809, 758, 710, 556. HRMS: calcd. for C<sub>21</sub>H<sub>20</sub>F<sub>3</sub>N<sub>3</sub>O<sub>3</sub>Na<sup>+</sup> [M+ Na]<sup>+</sup>: 442.1349; Found: 442.1355.

**(6f) 3-(2-azido-2-phenylethyl)-1-(p-tolyl)hexane-1,4-dione**

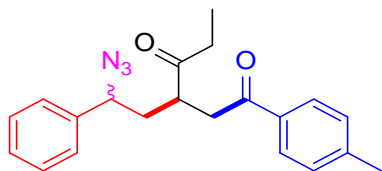

The title compound was prepared according to the general procedure described above by the reaction between styrene (**1a**), 4-methylbenzaldehyde (**2a**), pent-1-en-3-one (**3f**), with TBHP and TMSN<sub>3</sub>, and purified by flash column chromatography (ethyl ether/petroleum ether = 1:20, R<sub>f</sub> = 0.4) as colorless oil (31.4 mg, 45%).

<sup>1</sup>H NMR (400 MHz, CDCl<sub>3</sub>) δ 7.83 – 7.80 (m, 2H), 7.42 – 7.29 (m, 5H), 7.26 – 7.23 (m, 2H), 4.53 – 4.44 (m, 1H), 3.48 – 3.40 (m, 1H), 3.33 – 3.28 (m, 1H), 3.10 – 3.03 (m, 1H), 2.80 – 2.70 (m, 1H), 2.65 – 2.51 (m, 1H), 2.40 (s, 3H), 2.20 – 2.04 (m, 1H), 1.95 – 1.89 (m, 0.4×1H), 1.81 – 1.76 (m, 0.6×1H), 1.09 – 1.04 (m, 3H). <sup>13</sup>C NMR (100 MHz, CDCl<sub>3</sub>) δ 213.70, 213.42, 197.79, 197.68, 144.35, 139.03, 138.94, 134.02, 133.96, 129.43, 129.16, 129.14, 128.82, 128.77, 128.25, 127.00, 126.96, 64.49, 64.43, 43.70, 43.38, 41.13, 40.59, 38.32, 37.88, 36.34, 35.98, 21.79, 7.80, 7.76. IR (cm<sup>-1</sup>): 3059, 3038, 2923, 2098, 1766, 1681, 1651, 1606, 1368, 1201, 1123, 813, 773, 702, 559. HRMS: calcd. for C<sub>21</sub>H<sub>23</sub>N<sub>3</sub>O<sub>2</sub>Na<sup>+</sup> [M+ Na]<sup>+</sup>: 372.1682; Found: 372.1685.

**(6g) 4-[1-azido-3-cyano-5-oxo-5-(p-tolyl)pentyl]phenyl acetate**

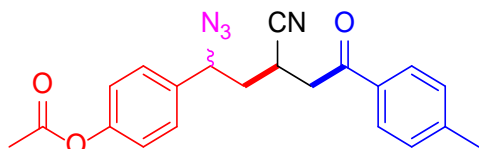

The title compound was prepared according to the general procedure described above by the reaction between 4-vinylphenyl acetate (**1h**), 4-methylbenzaldehyde (**2a**), acrylonitrile (**3g**), with TBHP and TMSN<sub>3</sub>, and purified by flash column chromatography (ethyl ether/petroleum ether = 1:20, R<sub>f</sub> = 0.3) as colorless oil (30.1 mg, 40%).

<sup>1</sup>H NMR (400 MHz, CDCl<sub>3</sub>) δ 7.84 – 7.81 (m, 2H), 7.43 – 7.37 (m, 2H), 7.29 – 7.27 (m, 2H), 7.20 – 7.13 (m, 2H), 4.84 – 4.75 (m, 1H), 3.66 – 3.59 (m, 0.5×1H), 3.43 – 3.21 (m, 2H), 3.11 – 3.05 (m, 0.5×1H), 2.42 (s, 3H), 2.32 – 2.31 (m, 3H), 2.23 – 2.15 (m, 0.5×1H), 2.11 – 1.95 (m, 1.5×1H). <sup>13</sup>C NMR (100 MHz, CDCl<sub>3</sub>) δ 194.44, 194.38, 169.37, 169.27, 151.12, 150.88, 145.04, 145.01, 136.13, 134.93, 130.20, 129.58, 129.23, 128.32, 128.20, 128.18, 127.95, 122.47, 122.36, 121.07, 120.95, 63.34, 40.37, 38.88, 37.48, 24.21, 23.82, 21.77, 21.19, 21.16. IR (cm<sup>-1</sup>): 3347, 3037, 2924, 2242, 2102, 1766, 1682, 1606, 1508, 1410, 1368, 1205, 1016, 912, 810, 737. HRMS: calcd. for C<sub>21</sub>H<sub>20</sub>N<sub>4</sub>O<sub>3</sub>Na<sup>+</sup> [M+ Na]<sup>+</sup>: 399.1428; Found: 399.1432.

**(6h) 4-[1-azido-3-(dimethylcarbamoyl)-5-oxo-5-(p-tolyl)pentyl]phenyl acetate**

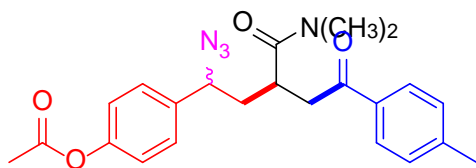

The title compound was prepared according to the general procedure described above by the reaction between 4-vinylphenyl acetate (**1h**), 4-methylbenzaldehyde (**2a**), *N,N*-dimethylacrylamide (**3h**), with TBHP and TMSN<sub>3</sub>, and purified by flash column chromatography (ethyl ether/petroleum ether = 1:4, R<sub>f</sub> = 0.3) as colorless oil (52.3 mg, 62%).

<sup>1</sup>H NMR (400 MHz, CDCl<sub>3</sub>) δ 7.86 – 7.81 (m, 2.30×1H), 7.35 – 7.33 (m, 2.30×1H), 7.28 – 7.23 (m, 2.30×1H), 7.15 – 7.10 (m, 2.30×1H), 4.53 (dd, *J* = 8.0, 6.8 Hz, 0.5×1H), 4.40 (dd, *J* = 10.0, 4.4 Hz, 0.65×1H), 3.66 – 3.61 (m, 0.65×1H), 3.55 – 3.41 (m, 1.65×1H), 3.22 (s, 1.95H), 3.12 – 3.11 (m, 0.34×1H), 3.07 – 3.04 (m, 0.50×1H), 3.01 – 3.00 (m, 0.31×1H), 3.01 – 3.00 (m, 3.45×1H), 2.92 (s, 1.50×1H), 2.32 – 2.31 (m, 3H), 2.40 (s, 3.45×1H), 2.31 – 2.30 (m, 3.45×1H), 2.24 – 2.17 (m, 0.50×1H), 2.15 – 2.08 (m, 0.65×1H), 1.96 – 1.89 (m, 1.15×1H). <sup>13</sup>C NMR (100 MHz, CDCl<sub>3</sub>) 198.09, 197.96, 174.59, 174.44, 169.34, 169.30, 150.81, 150.65, 144.24, 137.06, 136.41, 134.14, 134.06, 129.37, 128.26, 128.24, 128.18, 127.96, 122.23, 122.07, 63.96, 63.55, 42.34, 41.30, 39.99, 38.31, 37.65, 37.44, 36.01, 35.90, 33.74, 33.72, 21.73, 21.20. IR (cm<sup>-1</sup>): 3053, 2927, 2100, 1766, 1681, 1607, 1506, 1401, 1367, 1015, 912, 813, 736, 702, 552. HRMS: calcd. for C<sub>23</sub>H<sub>26</sub>N<sub>4</sub>O<sub>4</sub>Na<sup>+</sup> [M+ Na]<sup>+</sup>: 445.1846; Found: 445.1853.

**(6i) 4-[1-azido-3-(morpholine-4-carbonyl)-5-oxo-5-(p-tolyl)pentyl]phenyl acetate**

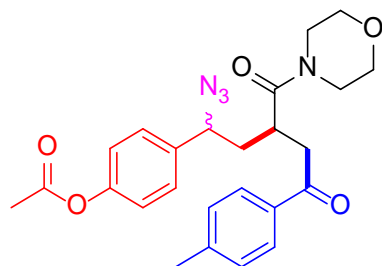

The title compound was prepared according to the general procedure described above by the reaction between 4-vinylphenyl acetate (**1h**), 4-methylbenzaldehyde (**2a**), 1-morpholinoprop-2-en-1-one (**3i**), with TBHP and TMSN<sub>3</sub>, and purified by flash column chromatography (ethyl ether/petroleum ether = 1:4, R<sub>f</sub> = 0.3) as colorless oil (59.4 mg, 64%).

<sup>1</sup>H NMR (400 MHz, CDCl<sub>3</sub>) δ 7.86 – 7.81 (m, 2H), 7.35 – 7.33 (m, 2H), 7.28 – 7.24 (m, 2H), 7.15 – 7.10 (m, 2H), 4.53 (dd, *J* = 8.0, 6.4 Hz, 0.5×1H), 4.40 (dd, *J* = 10.4, 4.4 Hz, 0.5×1H), 3.85 – 3.78 (m, 1H), 3.72 – 3.53 (m, 8H), 3.42 – 3.31 (m, 1H), 3.11 – 2.98 (m, 1H), 2.40 (s, 3H), 2.31 – 2.30 (m, 3H), 2.25 – 2.17 (m, 0.5×1H), 2.16 – 2.09 (m, 0.5×1H), 1.96 – 1.89 (m, 1H). <sup>13</sup>C NMR (100 MHz, CDCl<sub>3</sub>) 197.87, 197.74, 173.28, 173.14, 169.29, 169.25, 150.88, 150.72, 144.35, 136.85, 136.18, 134.05, 133.96, 129.39, 128.27, 128.25, 128.15, 127.92, 122.33, 122.15, 67.00, 66.92, 66.87, 66.71, 63.81, 63.49, 46.78, 46.31, 42.55, 42.41, 41.33, 40.09, 38.45, 33.28, 33.06, 21.72, 21.17. IR (cm<sup>-1</sup>): 3054, 2966, 2922, 2858, 2100, 1766, 1681, 1634, 1507, 1441, 1115, 1031, 911, 735, 552. HRMS: calcd. for C<sub>23</sub>H<sub>26</sub>N<sub>4</sub>O<sub>4</sub>Na<sup>+</sup> [M+ Na]<sup>+</sup>: 487.1952; Found: 487.1956.

**(6j) 4-[1-azido-3-(methyl(phenyl)carbamoyl)-5-oxo-5-(p-tolyl)pentyl]phenyl acetate**

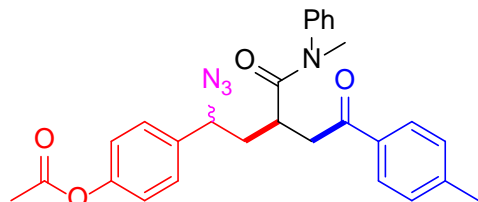

The title compound was prepared according to the general procedure described above by the reaction between 4-vinylphenyl acetate (**1h**), 4-methylbenzaldehyde (**2a**), *N*-methyl-*N*-phenylacrylamide (**3j**), with TBHP and TMSN<sub>3</sub>, and purified by flash column chromatography (ethyl ether/petroleum ether = 1:8, R<sub>f</sub> = 0.4) as colorless oil (46.5 mg, 48%).

<sup>1</sup>H NMR (400 MHz, CDCl<sub>3</sub>) δ 7.79 – 7.75 (m, 2H), 7.43 – 7.33 (m, 4H), 7.27 – 7.21 (m, 5H), 7.10 – 7.07 (m, 2H), 7.01 – 7.00 (m, 1H), 4.36 – 4.29 (m, 1H), 3.51 – 3.39 (m, 1H), 3.28 – 3.26 (s, 3H), 3.23 – 3.16 (m, 1H), 3.00 – 2.93 (m, 1H), 2.4 (s, 3H), 2.29 – 2.28 (m, 3H), 2.17 – 2.10 (m, 0.6×1H), 2.01 – 1.96 (m, 0.4×1H), 1.89 – 1.79 (m, 1H). <sup>13</sup>C NMR (100 MHz, CDCl<sub>3</sub>) 197.66, 174.10, 169.26, 169.21, 150.64, 150.50, 144.02, 143.47, 143.38, 136.35, 136.27, 134.04, 129.83, 129.27, 128.19, 128.15, 128.11, 127.96, 127.80, 127.57, 127.52, 122.10, 122.00, 63.68, 63.21, 40.76, 40.64, 38.13, 37.80, 37.67, 37.36, 35.38, 35.27, 21.66, 21.15. IR (cm<sup>-1</sup>): 3059, 3038, 2923,

2098, 1766, 1681, 1651, 1507, 1495, 1392, 1368, 911, 773, 702, 559. HRMS: calcd. for  $C_{28}H_{29}N_4O_4Na^+$   $[M+Na]^+$ : 507.2003; Found: 507.2010.

**(7) 2,2,6,6-tetramethylpiperidin-1-yl 4-methylbenzoate<sup>1</sup>**

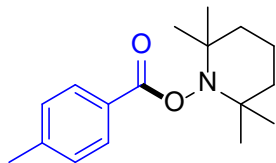

White solid. M.p. 54.0-55.0 °C, (ethyl ether/petroleum ether = 1:50,  $R_f$  = 0.6).  $^1H$  NMR (400 MHz,  $CDCl_3$ )  $\delta$  7.97 (d,  $J$  = 8.0 Hz, 2H), 7.26 (d,  $J$  = 8.0 Hz, 2H), 2.42 (s, 3H), 1.81 – 1.67 (m, 3H), 1.60 – 1.57 (m, 2H), 1.48 – 1.48 (m, 1H), 1.27 (s, 6H), 1.11 (s, 6H).  $^{13}C$  NMR (100 MHz,  $CDCl_3$ )  $\delta$  166.50, 143.56, 129.63, 129.19, 126.90, 60.38, 39.05, 31.98, 21.69, 20.88, 17.04. IR ( $cm^{-1}$ ): 2974, 2933, 1407, 1378, 1176, 1132, 954, 748, 688.

**(8) 3-azido-3-phenyl-1-(p-tolyl)propan-1-one**

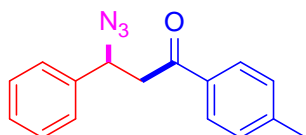

colorless oil, (ethyl ether/petroleum ether = 1:50,  $R_f$  = 0.4).  $^1H$  NMR (400 MHz,  $CDCl_3$ )  $\delta$  7.84 (d,  $J$  = 8.0 Hz, 2H), 7.40 – 7.39 (m, 4H), 7.35 – 7.31 (m, 1H), 7.25 (d,  $J$  = 8.0 Hz, 2H), 5.26 (d,  $J$  = 8.8, 4.8 Hz, 1H), 3.53 (dd,  $J$  = 17.2, 8.8 Hz, 1H), 3.22 (dd,  $J$  = 17.2, 4.8 Hz, 1H), 2.40 (s, 3H).  $^{13}C$  NMR (100 MHz,  $CDCl_3$ )  $\delta$  196.23, 144.55, 139.46, 134.12, 129.49, 129.04, 128.53, 128.36, 126.94, 61.65, 45.20, 21.78. IR ( $cm^{-1}$ ): 3059, 3036, 2098, 1686, 815, 754, 701, 551. HRMS: calcd. for  $C_{16}H_{15}N_3ONa^+$   $[M+Na]^+$ : 288.1107; Found: 288.1114.

**(9) methyl 2-azido-4-oxo-4-(p-tolyl)butanoate**

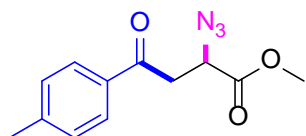

colorless oil, (ethyl ether/petroleum ether = 1:30,  $R_f$  = 0.4).  $^1H$  NMR (400 MHz,  $CDCl_3$ )  $\delta$  7.86 (d,  $J$  = 8.4 Hz, 2H), 7.28 (d,  $J$  = 8.0 Hz, 2H), 4.63 (dd,  $J$  = 7.2, 5.6 Hz, 1H), 3.84 (s, 3H), 3.52 (dd,  $J$  = 18.0, 5.2 Hz, 1H), 3.22 (dd,  $J$  = 17.6, 7.2 Hz, 1H), 2.40 (s, 3H).  $^{13}C$  NMR (100 MHz,  $CDCl_3$ )  $\delta$  195.36, 170.53, 144.92, 133.57, 129.58, 128.39, 58.08, 53.11, 40.06, 21.86. IR ( $cm^{-1}$ ): 3059, 2098, 1738, 1688, 1636, 754, 701, 551. HRMS: calcd. for  $C_{12}H_{13}N_3ONa^+$   $[M+Na]^+$ : 270.0849; Found: 270.0862.

**(10) methyl-4-oxo-2-(2-phenyl-2-(4-phenyl-1H-1,2,3-triazol-1-yl)ethyl)-4-(p-tolyl)butanoate**

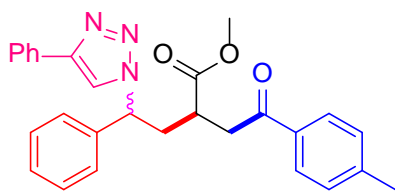

White solid. M.p. 60.0-61.0 °C (ethyl ether/petroleum ether = 1:15,  $R_f = 0.3$ ).  $^1\text{H}$  NMR (400 MHz,  $\text{CDCl}_3$ )  $\delta$  7.89 (s, 0.5×1H), 7.83 – 7.72 (m, 4H), 7.71 (s, 0.5×1H), 7.44 – 7.30 (m, 8H), 7.23 – 7.21 (m, 1H), 5.91 – 5.81 (m, 1H), 3.68 – 3.66 (m, 3H), 3.47 – 3.40 (m, 1H), 3.28 – 3.17 (m, 1H), 3.03 – 2.93 (m, 1.5×1H), 2.88 – 2.81 (m, 0.5×1H), 2.74 – 2.64 (m, 1H), 2.38 (s, 3H).  $^{13}\text{C}$  NMR (100 MHz,  $\text{CDCl}_3$ )  $\delta$  197.04, 197.01, 174.92, 174.77, 147.90, 144.42, 139.11, 138.15, 133.79, 133.75, 130.58, 130.53, 129.41, 129.24, 129.13, 129.00, 128.86, 128.84, 128.70, 128.20, 127.31, 126.68, 125.77, 125.75, 119.84, 119.09, 63.64, 63.29, 52.28, 52.25, 40.67, 40.14, 37.69, 37.59, 37.20, 36.60, 21.76. IR ( $\text{cm}^{-1}$ ): 3134, 3084, 2953, 2924, 1732, 1681, 1606, 1507, 1455, 1362, 839, 809, 776, 697. HRMS: calcd. for  $\text{C}_{28}\text{H}_{27}\text{N}_3\text{O}_3\text{Na}^+$   $[\text{M} + \text{Na}]^+$ : 476.1945; Found: 476.1945.

## IX. References

<sup>1</sup> M. Ociepa, O. Baka, J. Narodowiec and D. Gryko, *Adv. Synth. Catal.* 2017, **359**, 3560-3565.

## X. Copies of $^1\text{H}$ and $^{13}\text{C}$ NMR spectra of products 4a-4o, 5b-5s, 6b-6j, 7, 8, 9, 10.

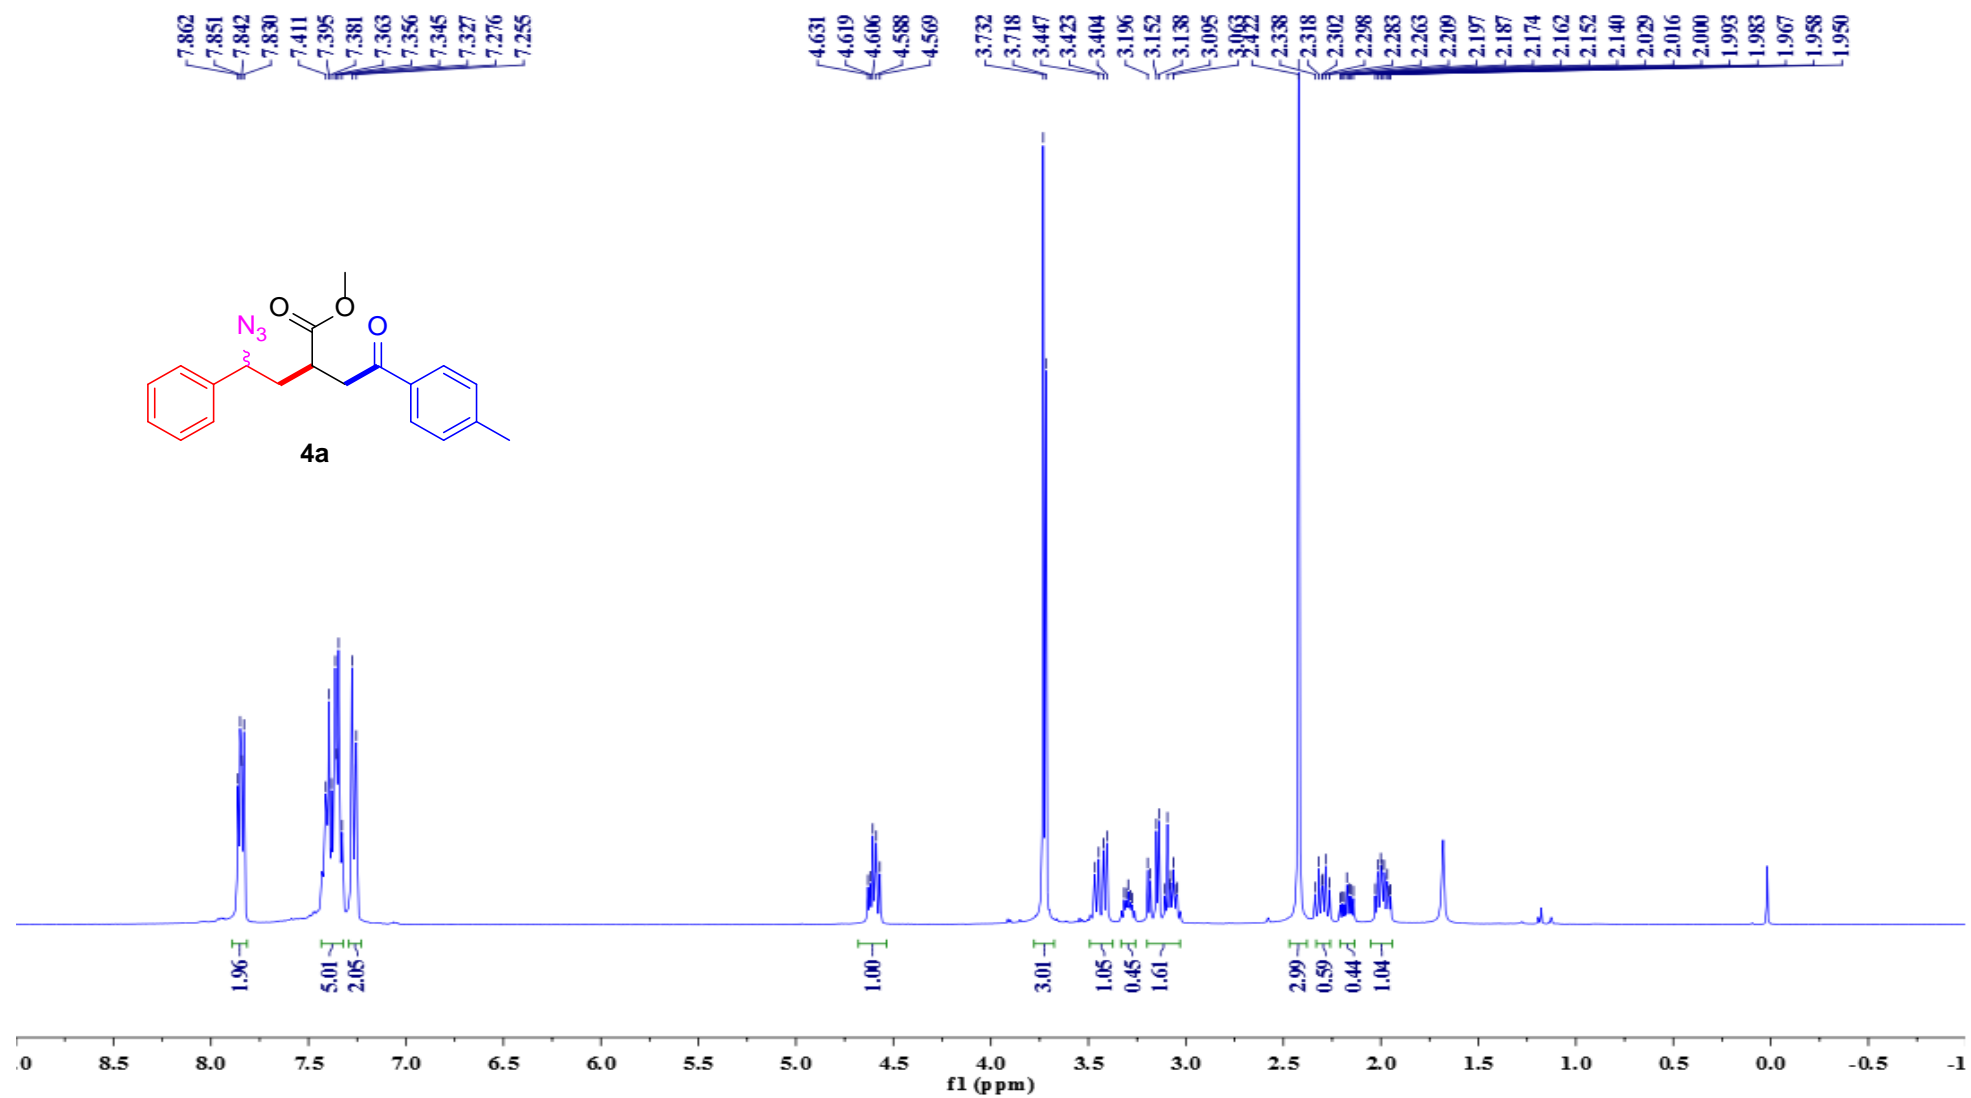

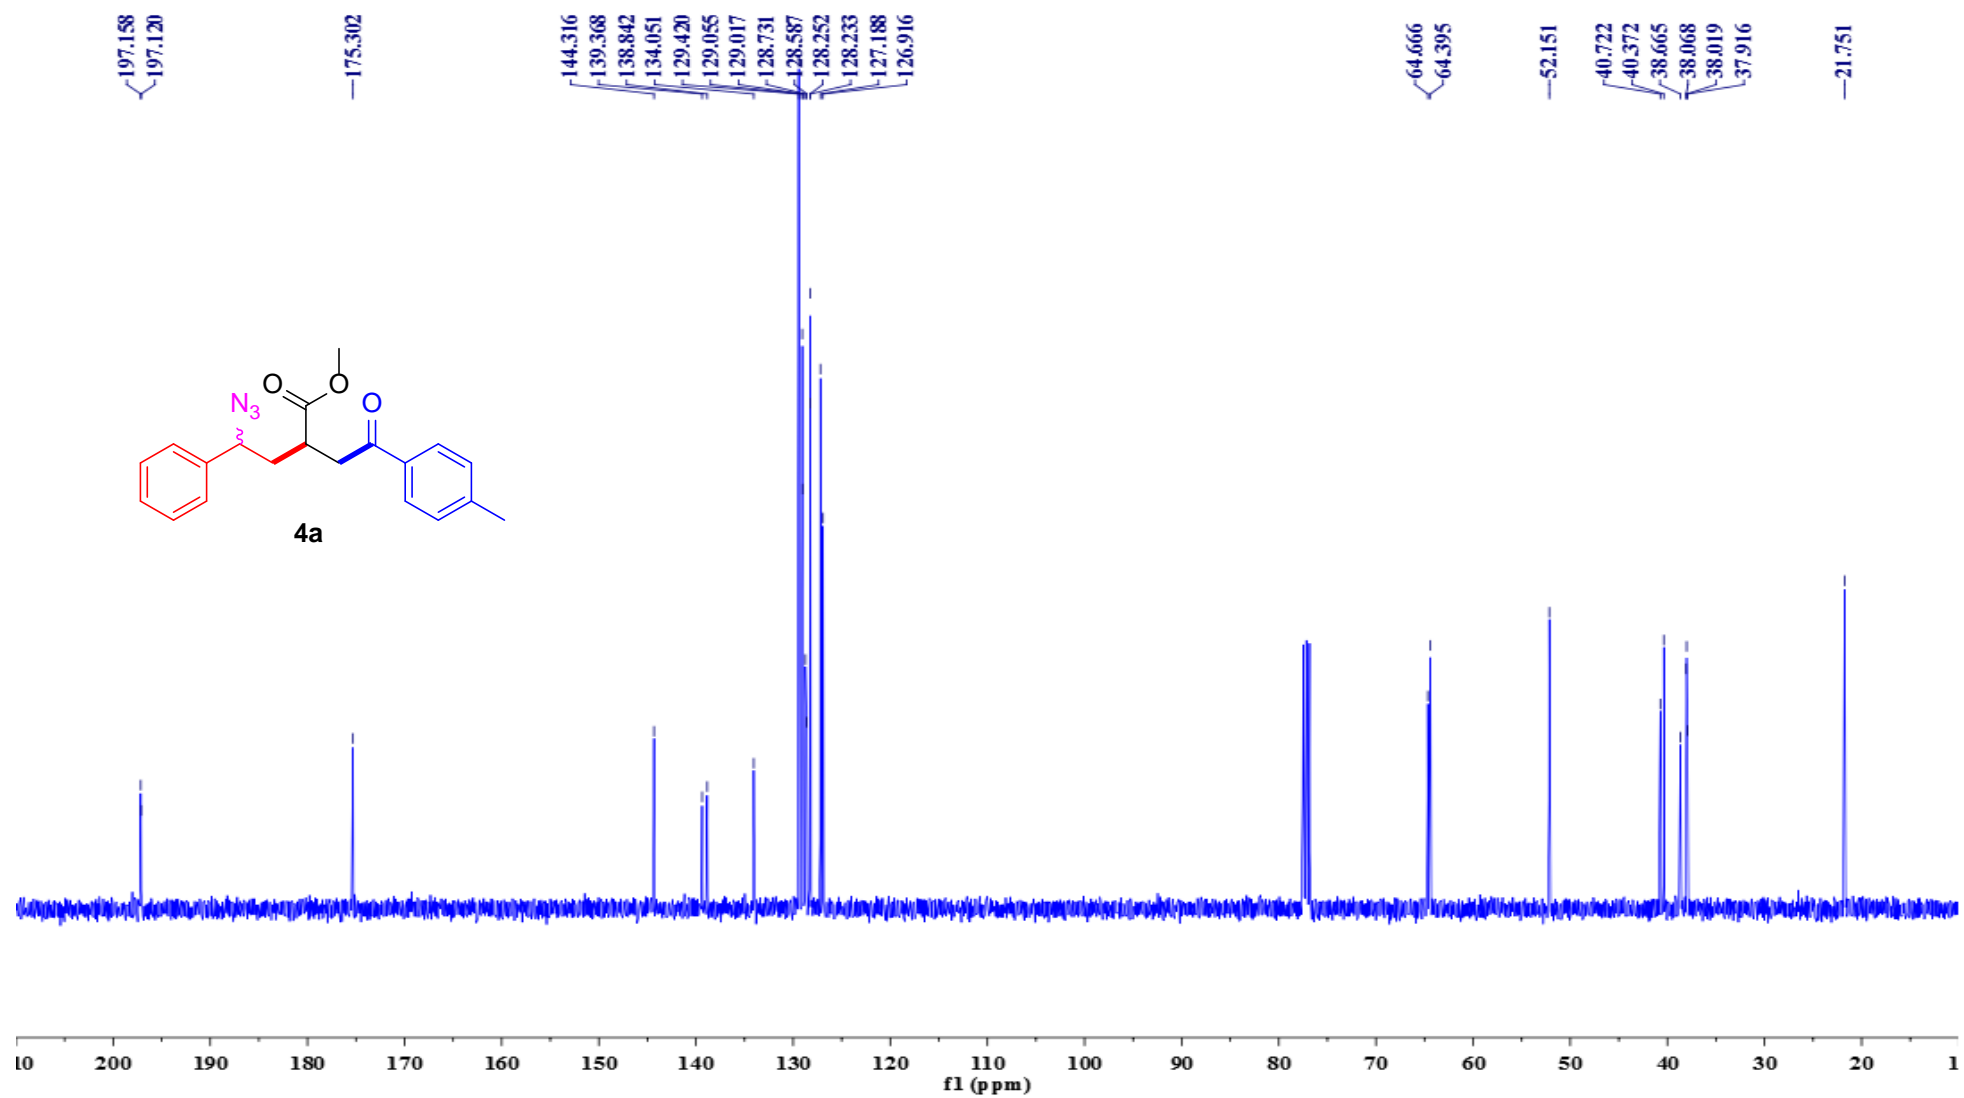

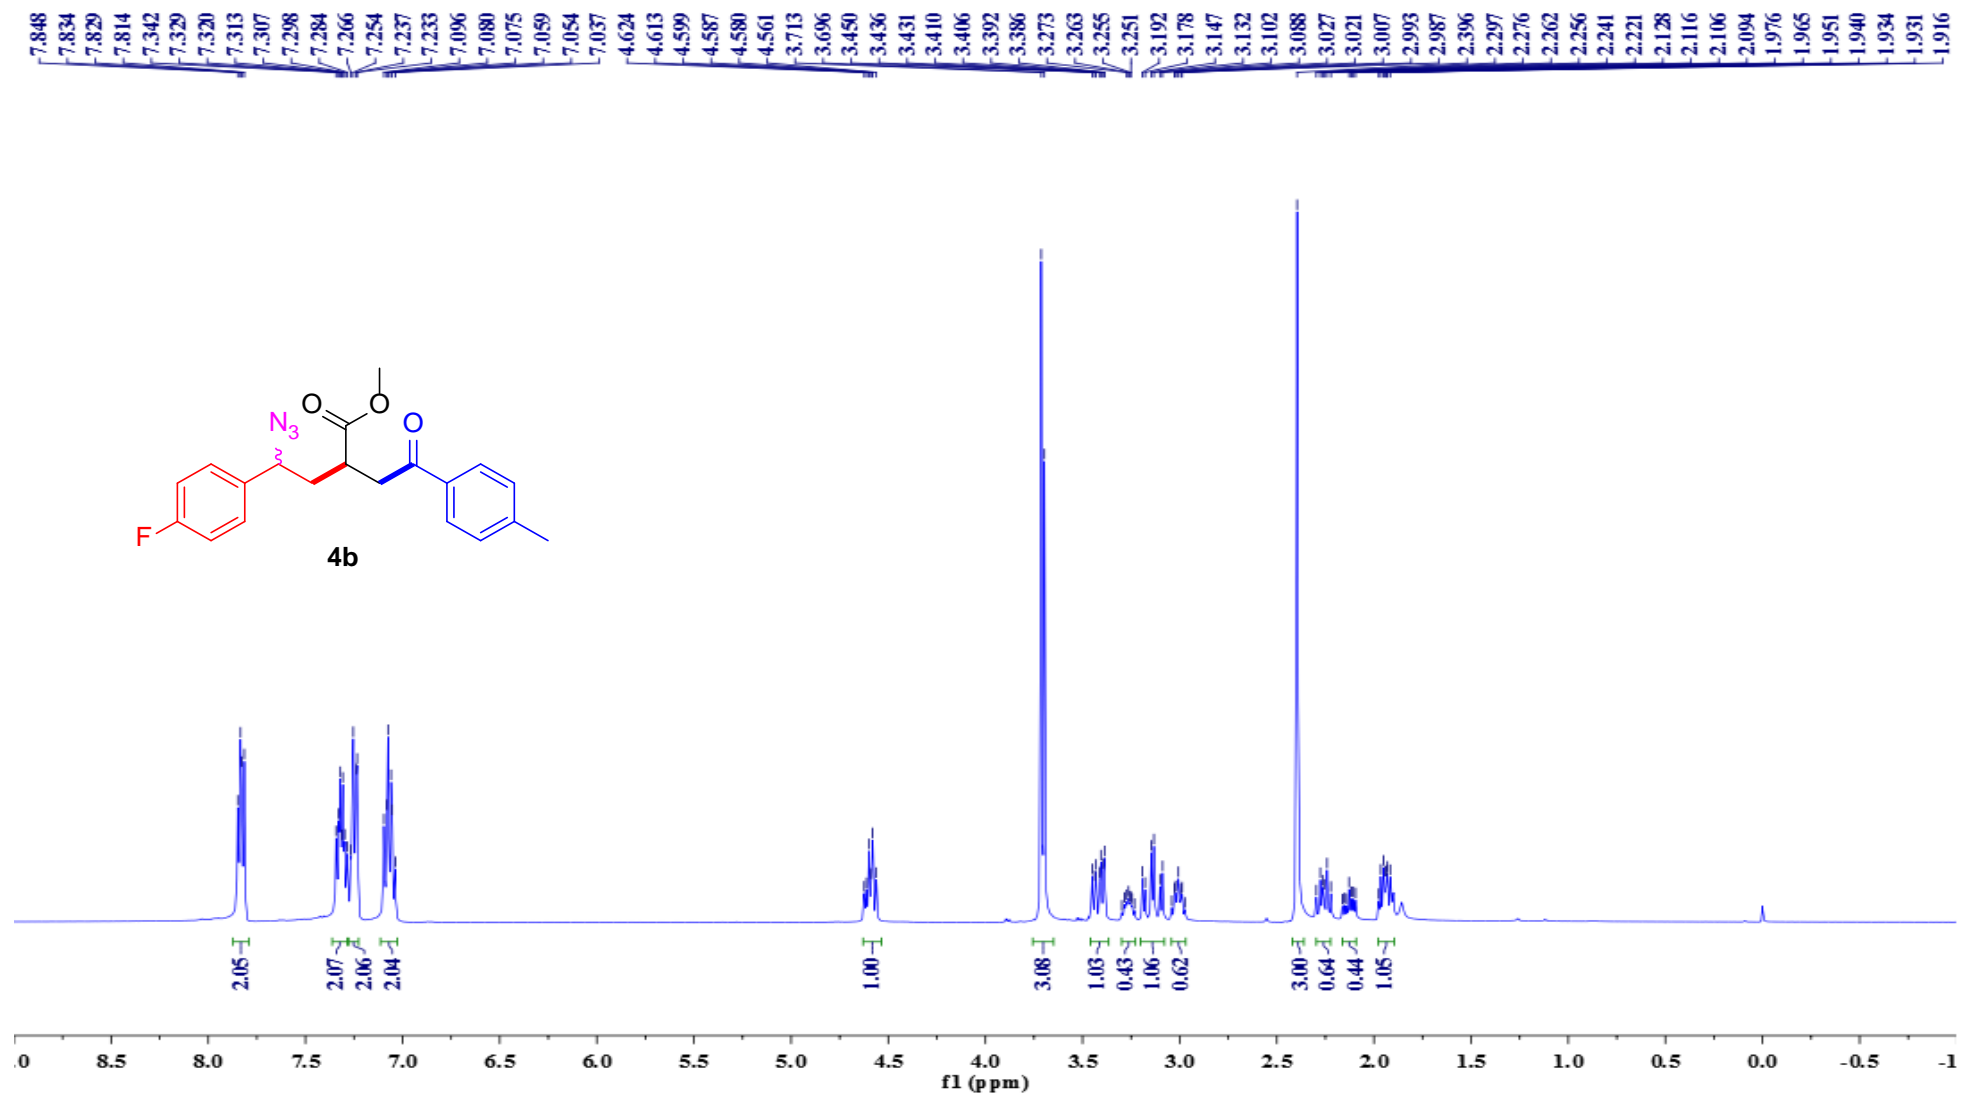



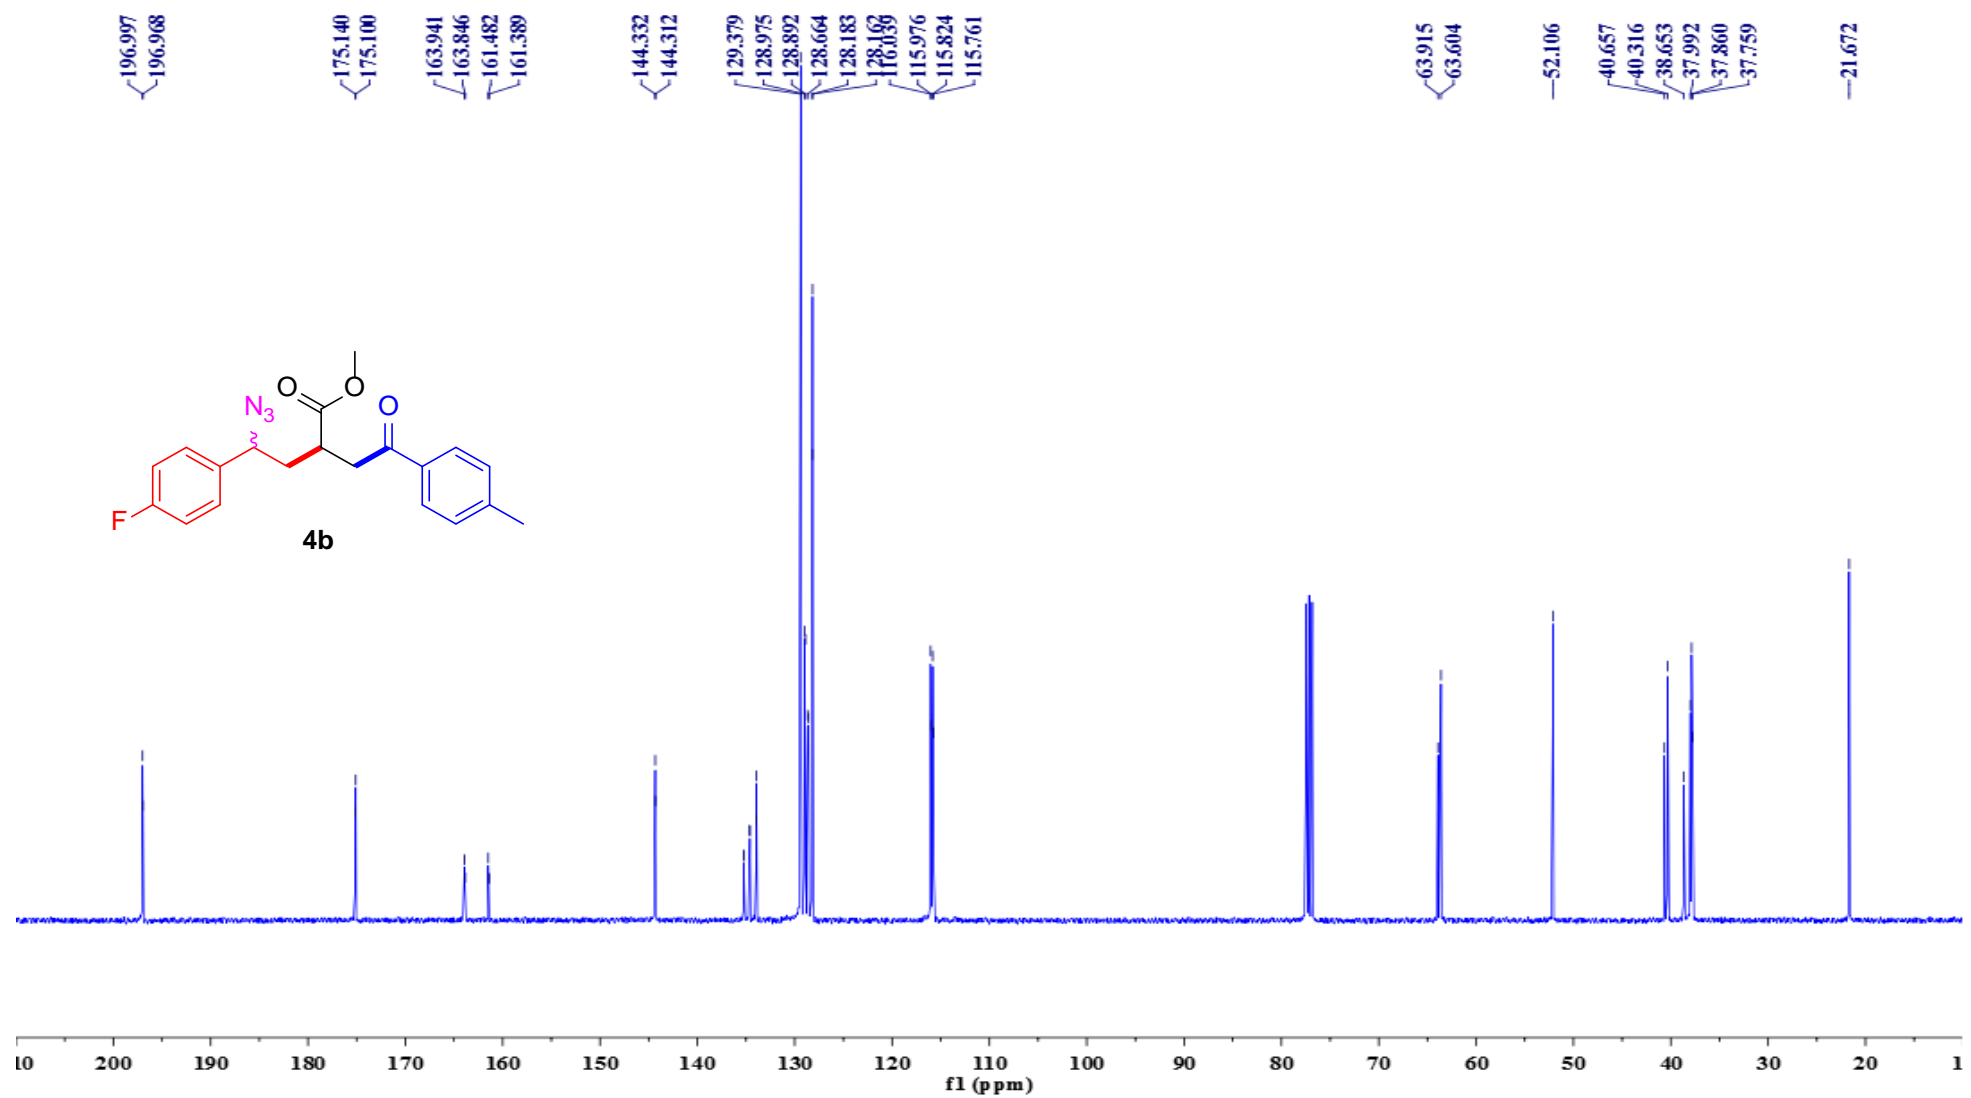

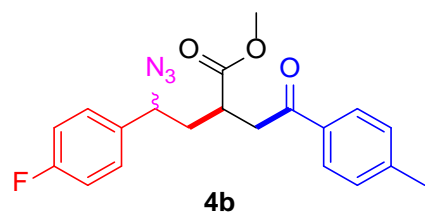

113.056  
113.307

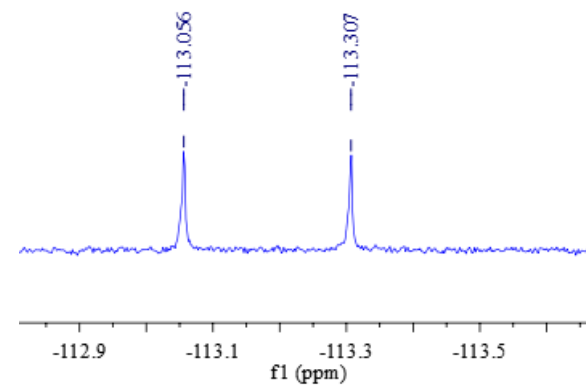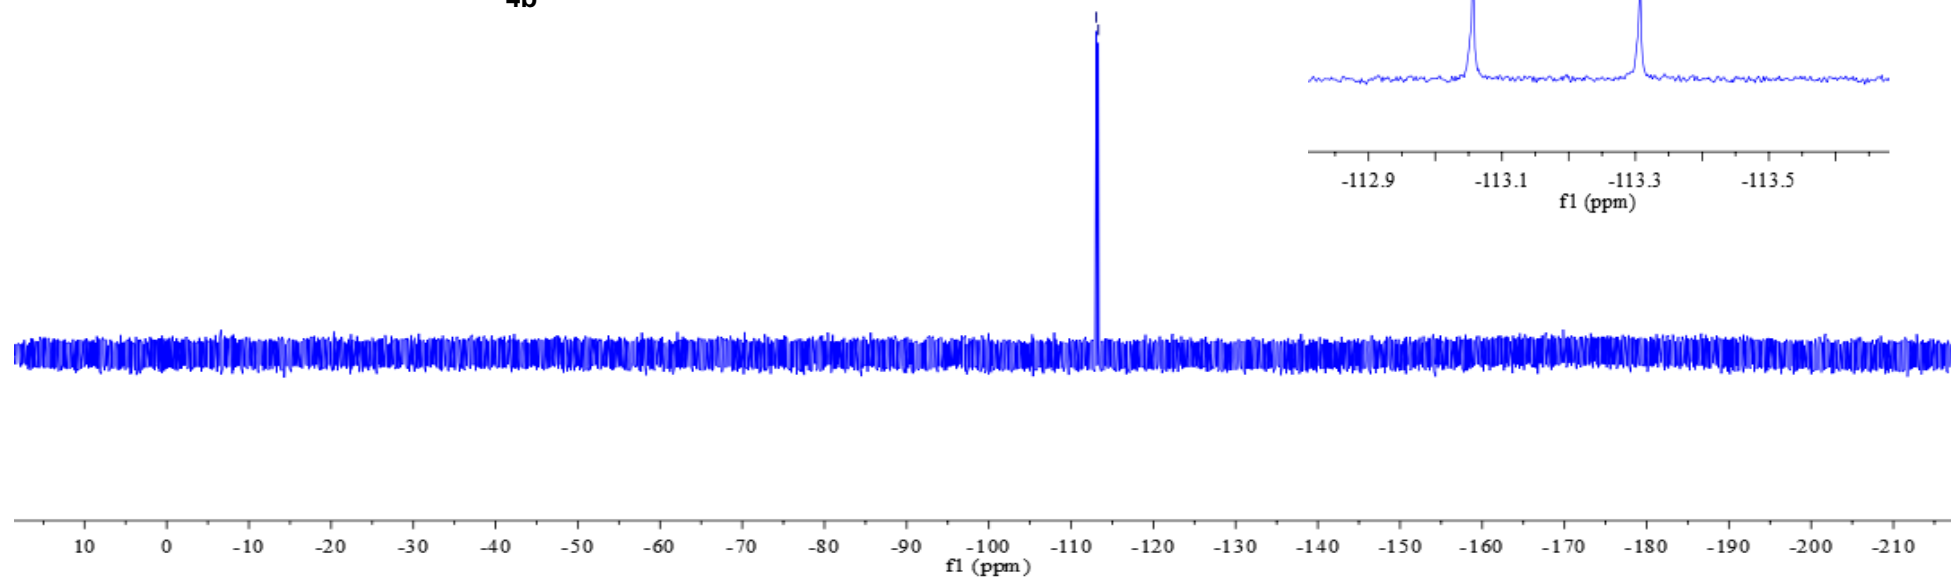

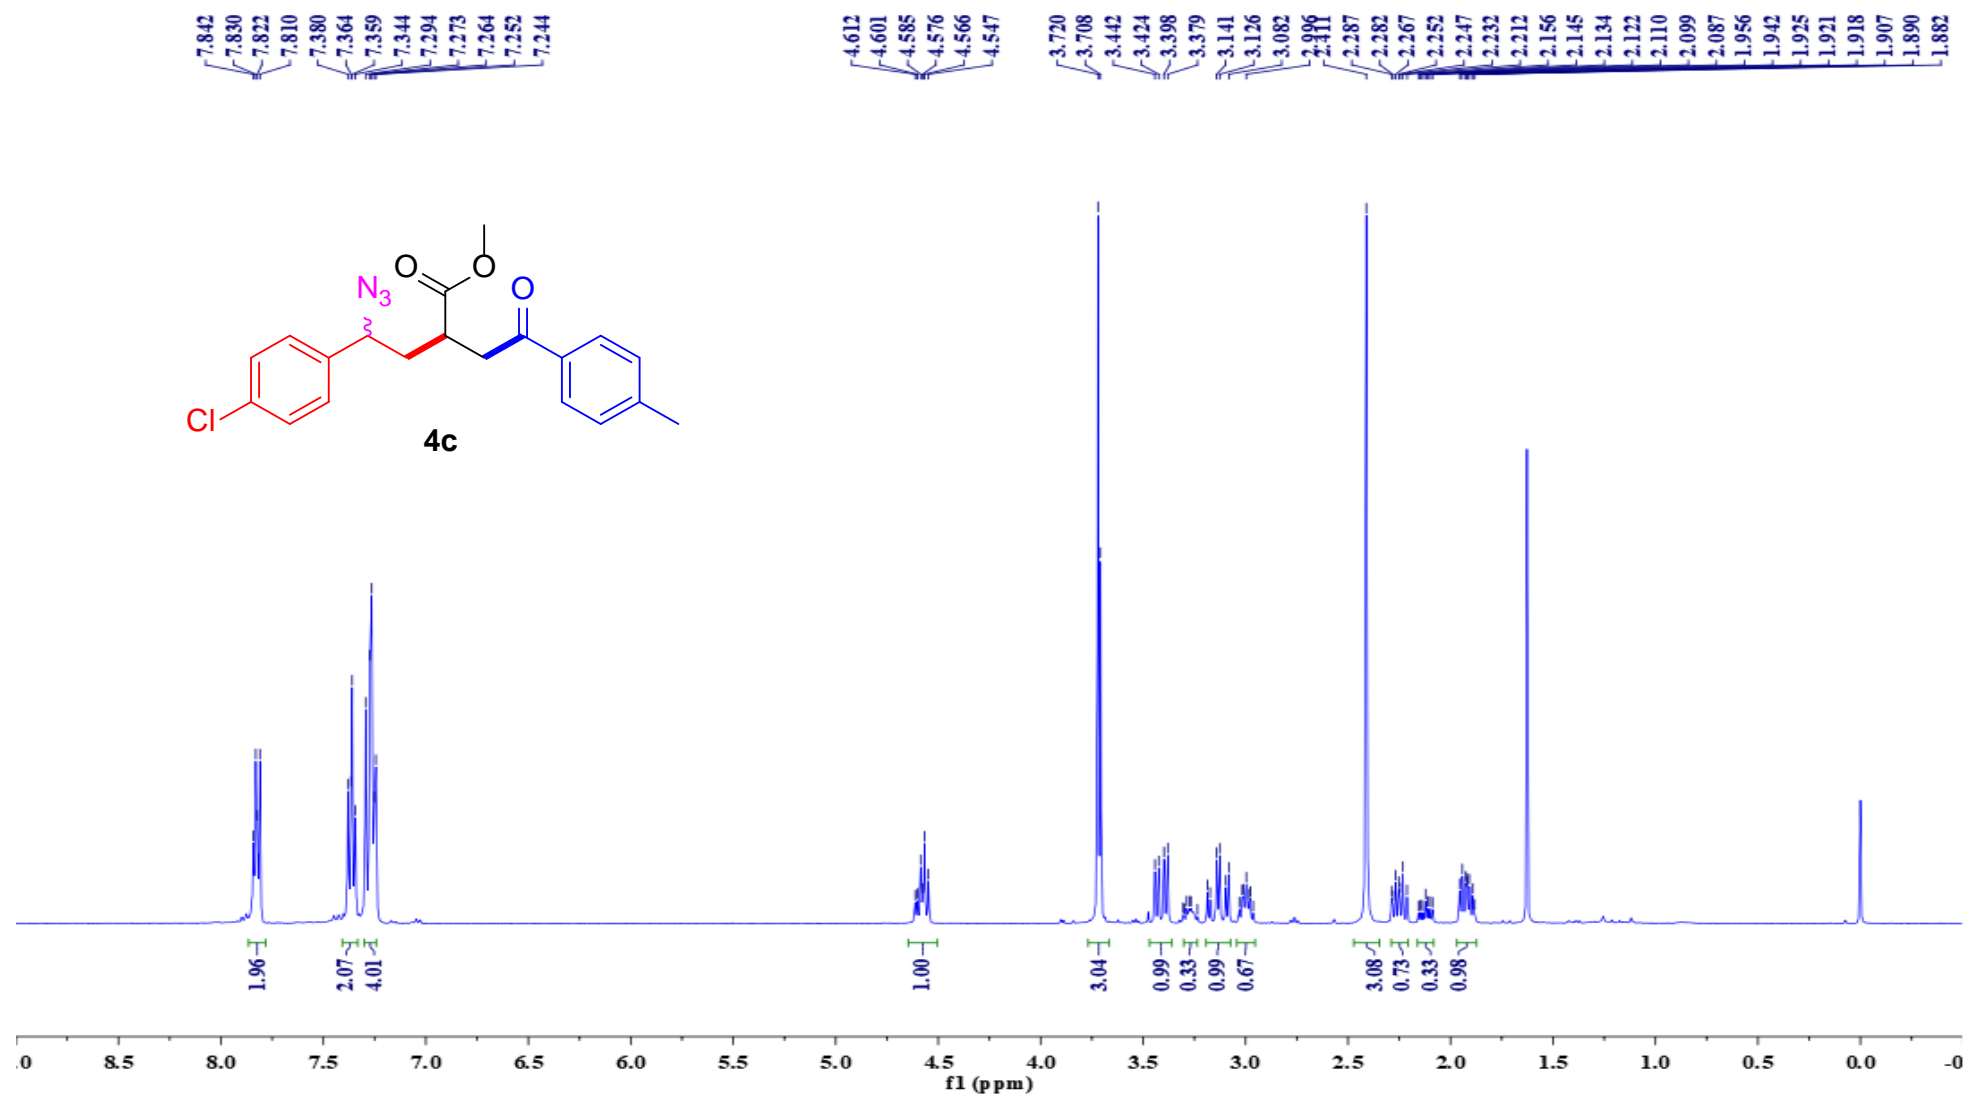

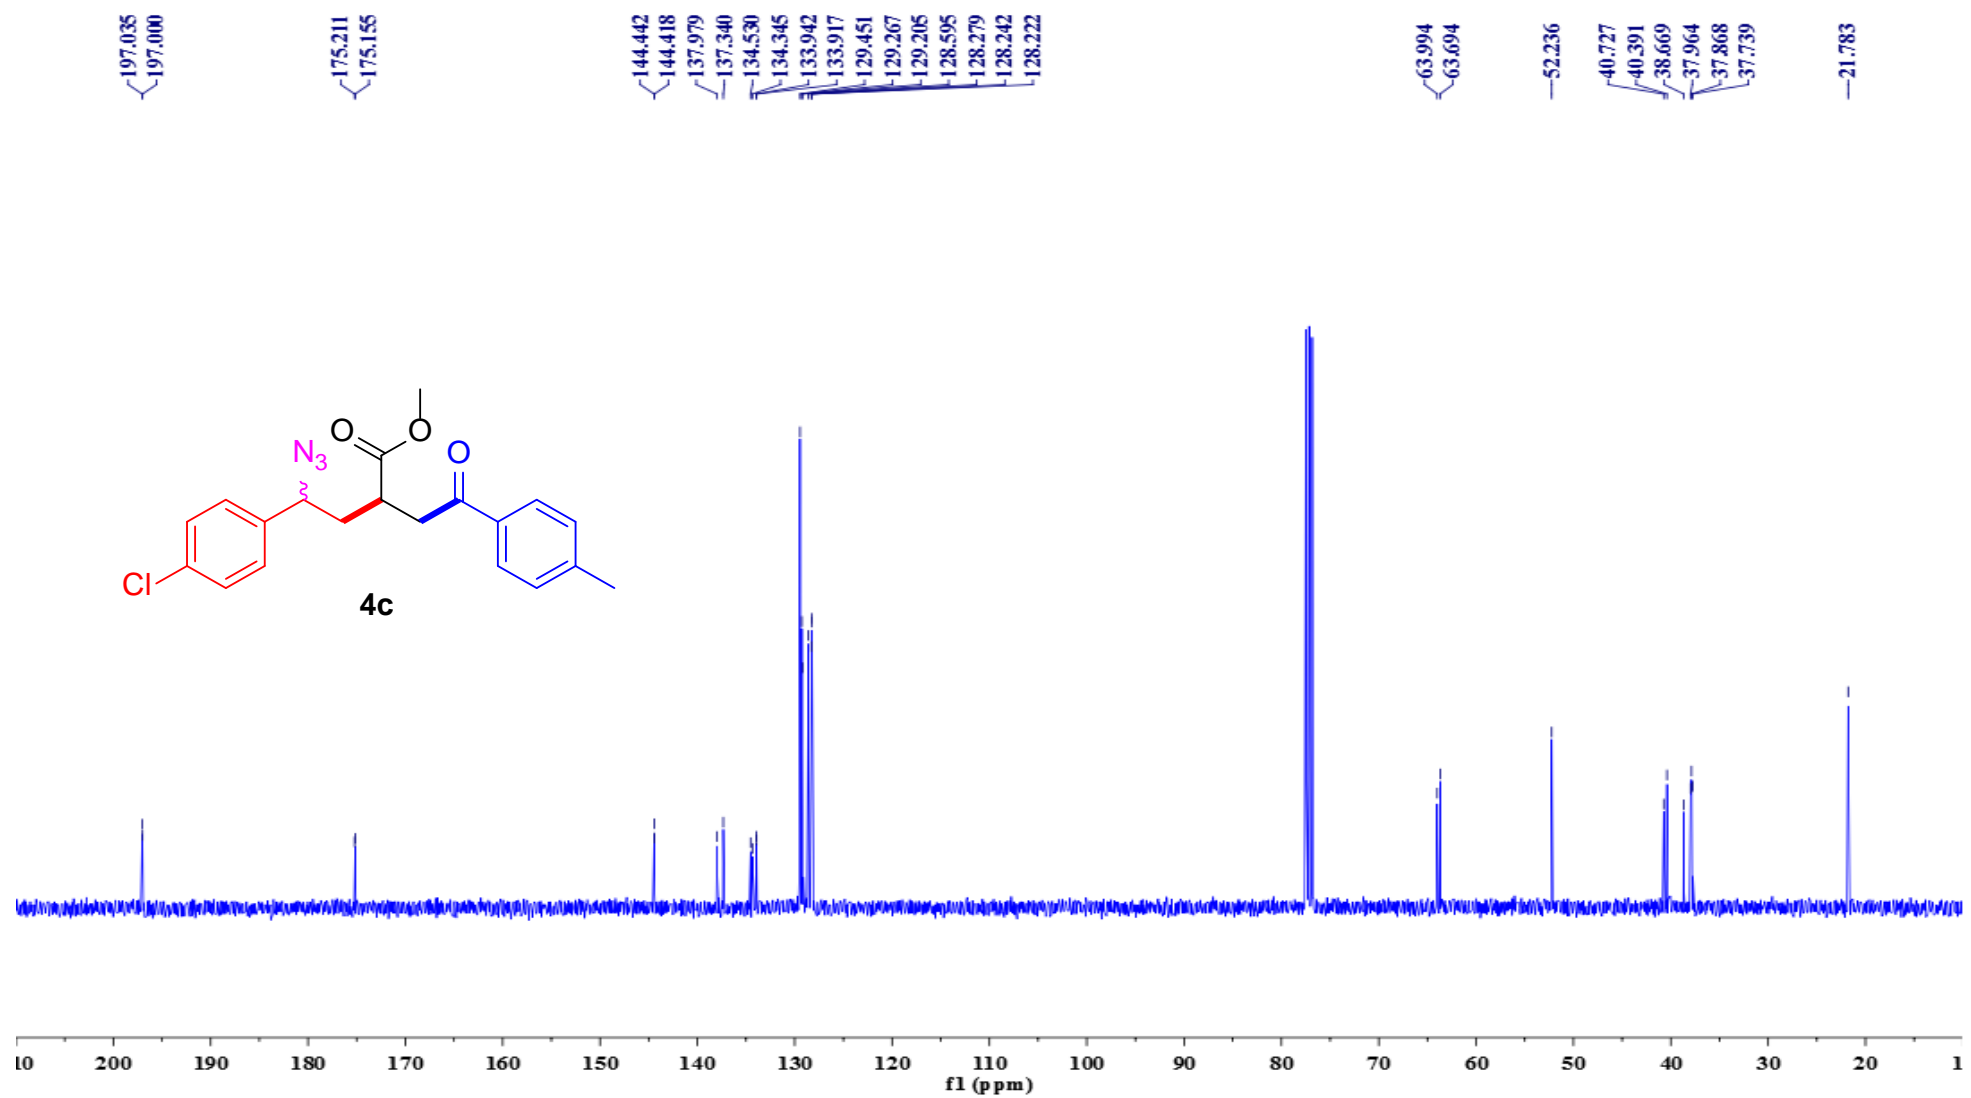

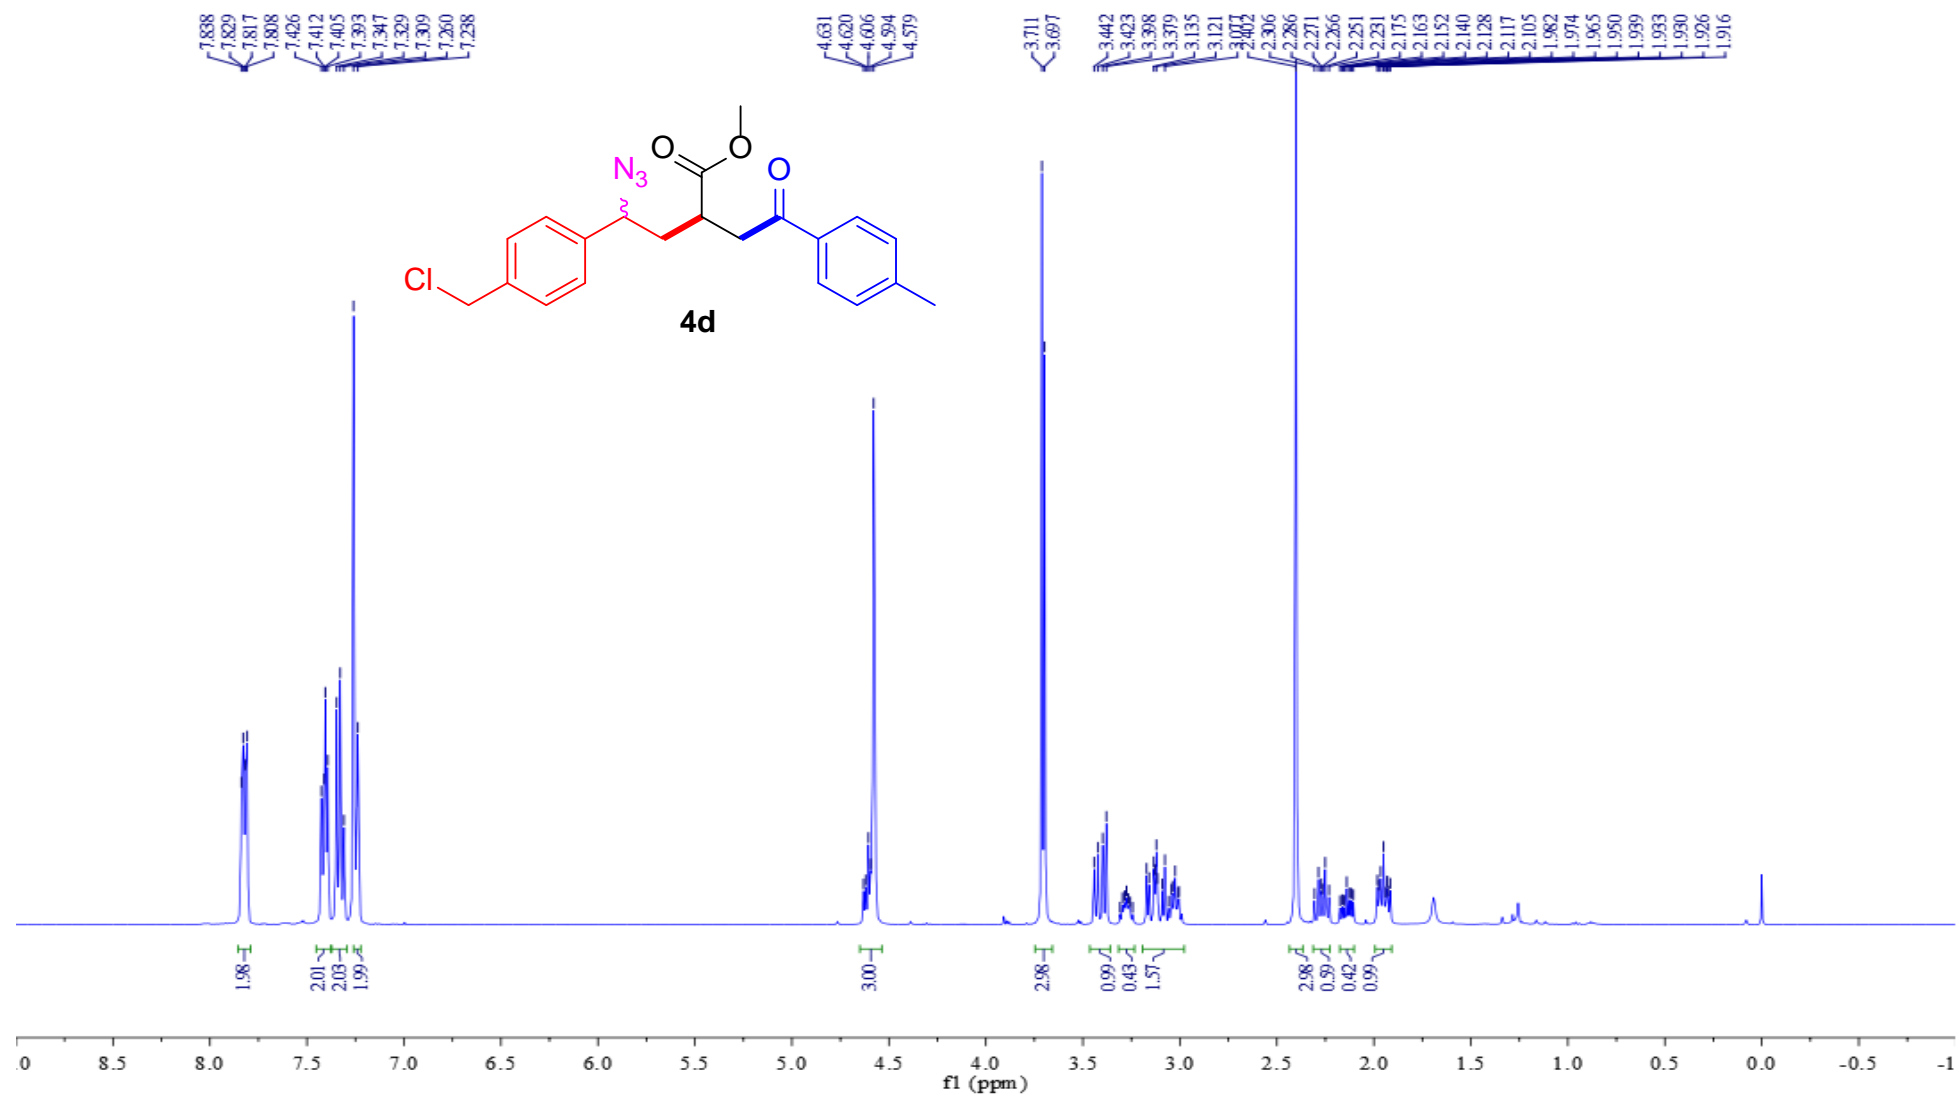

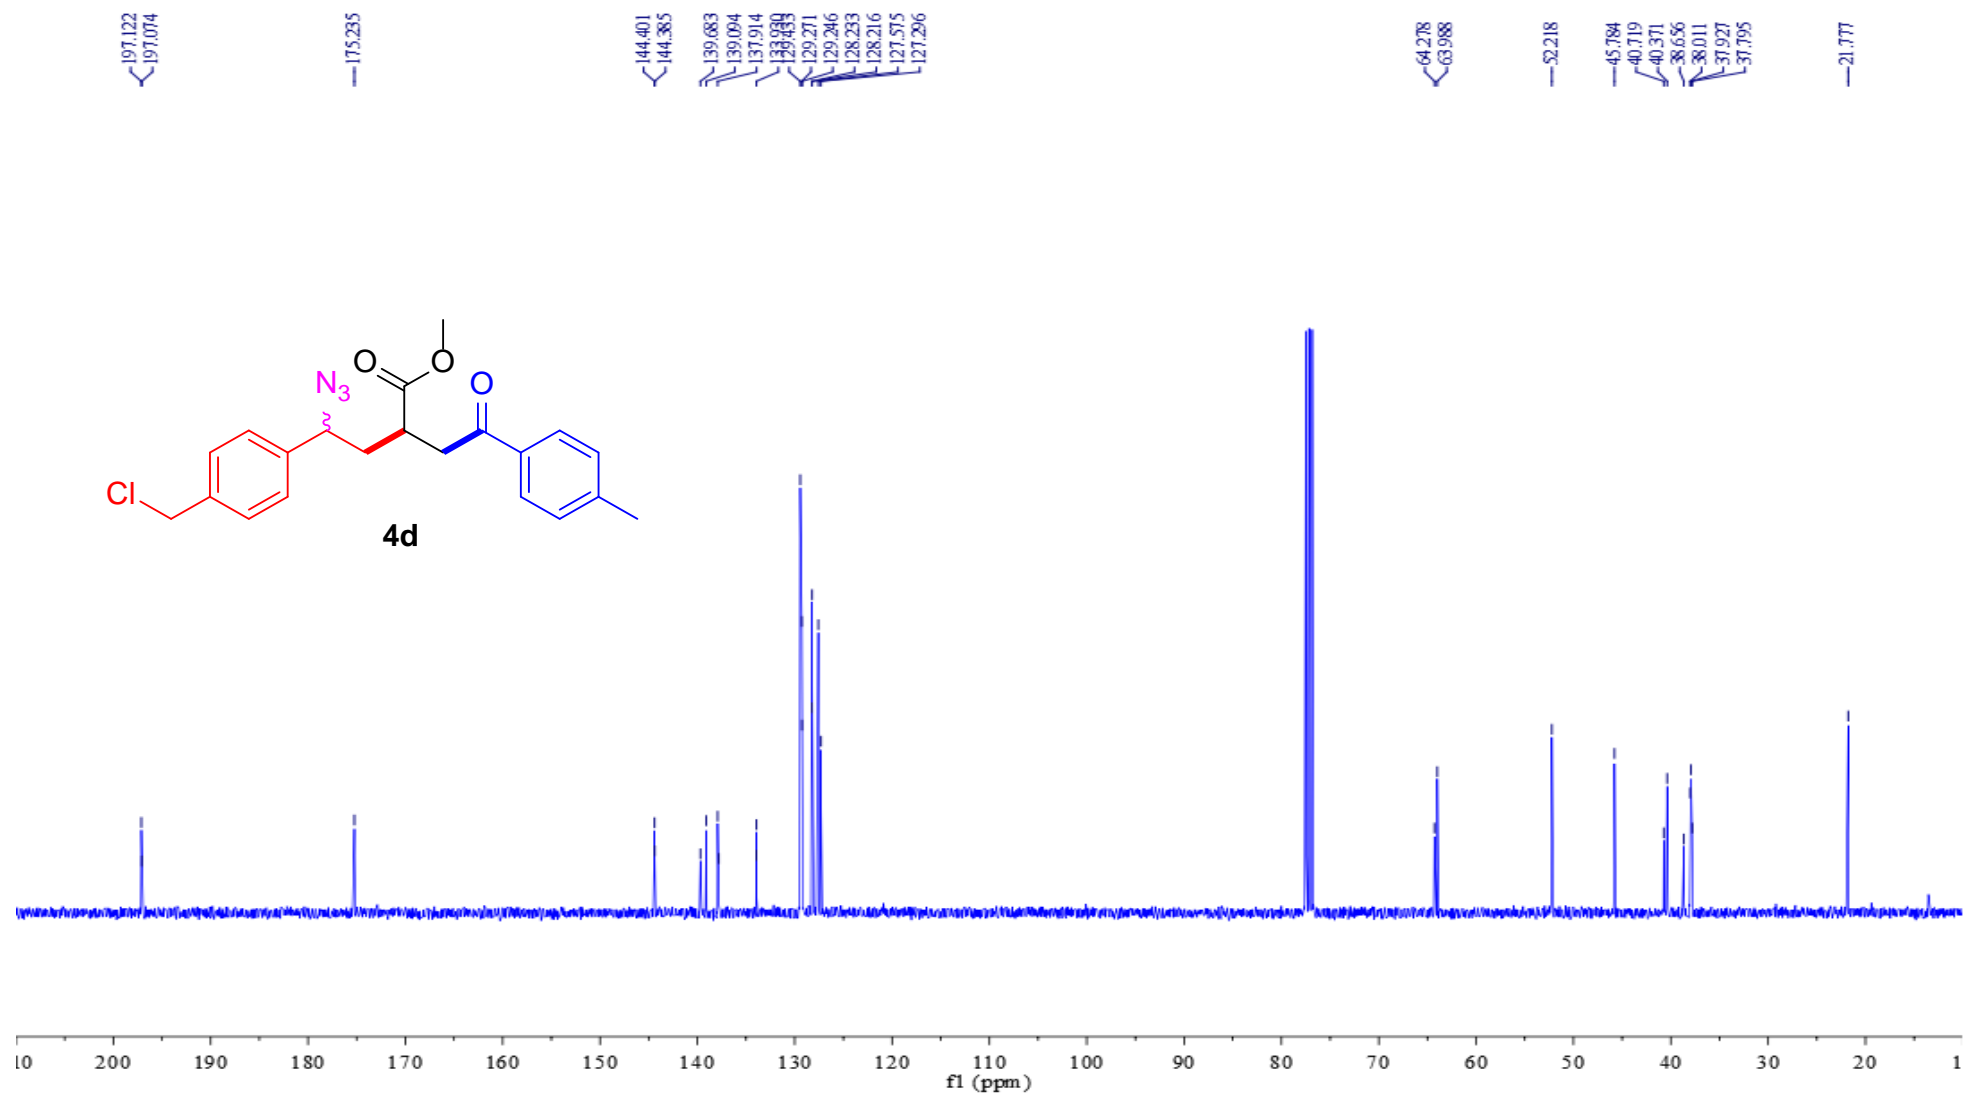

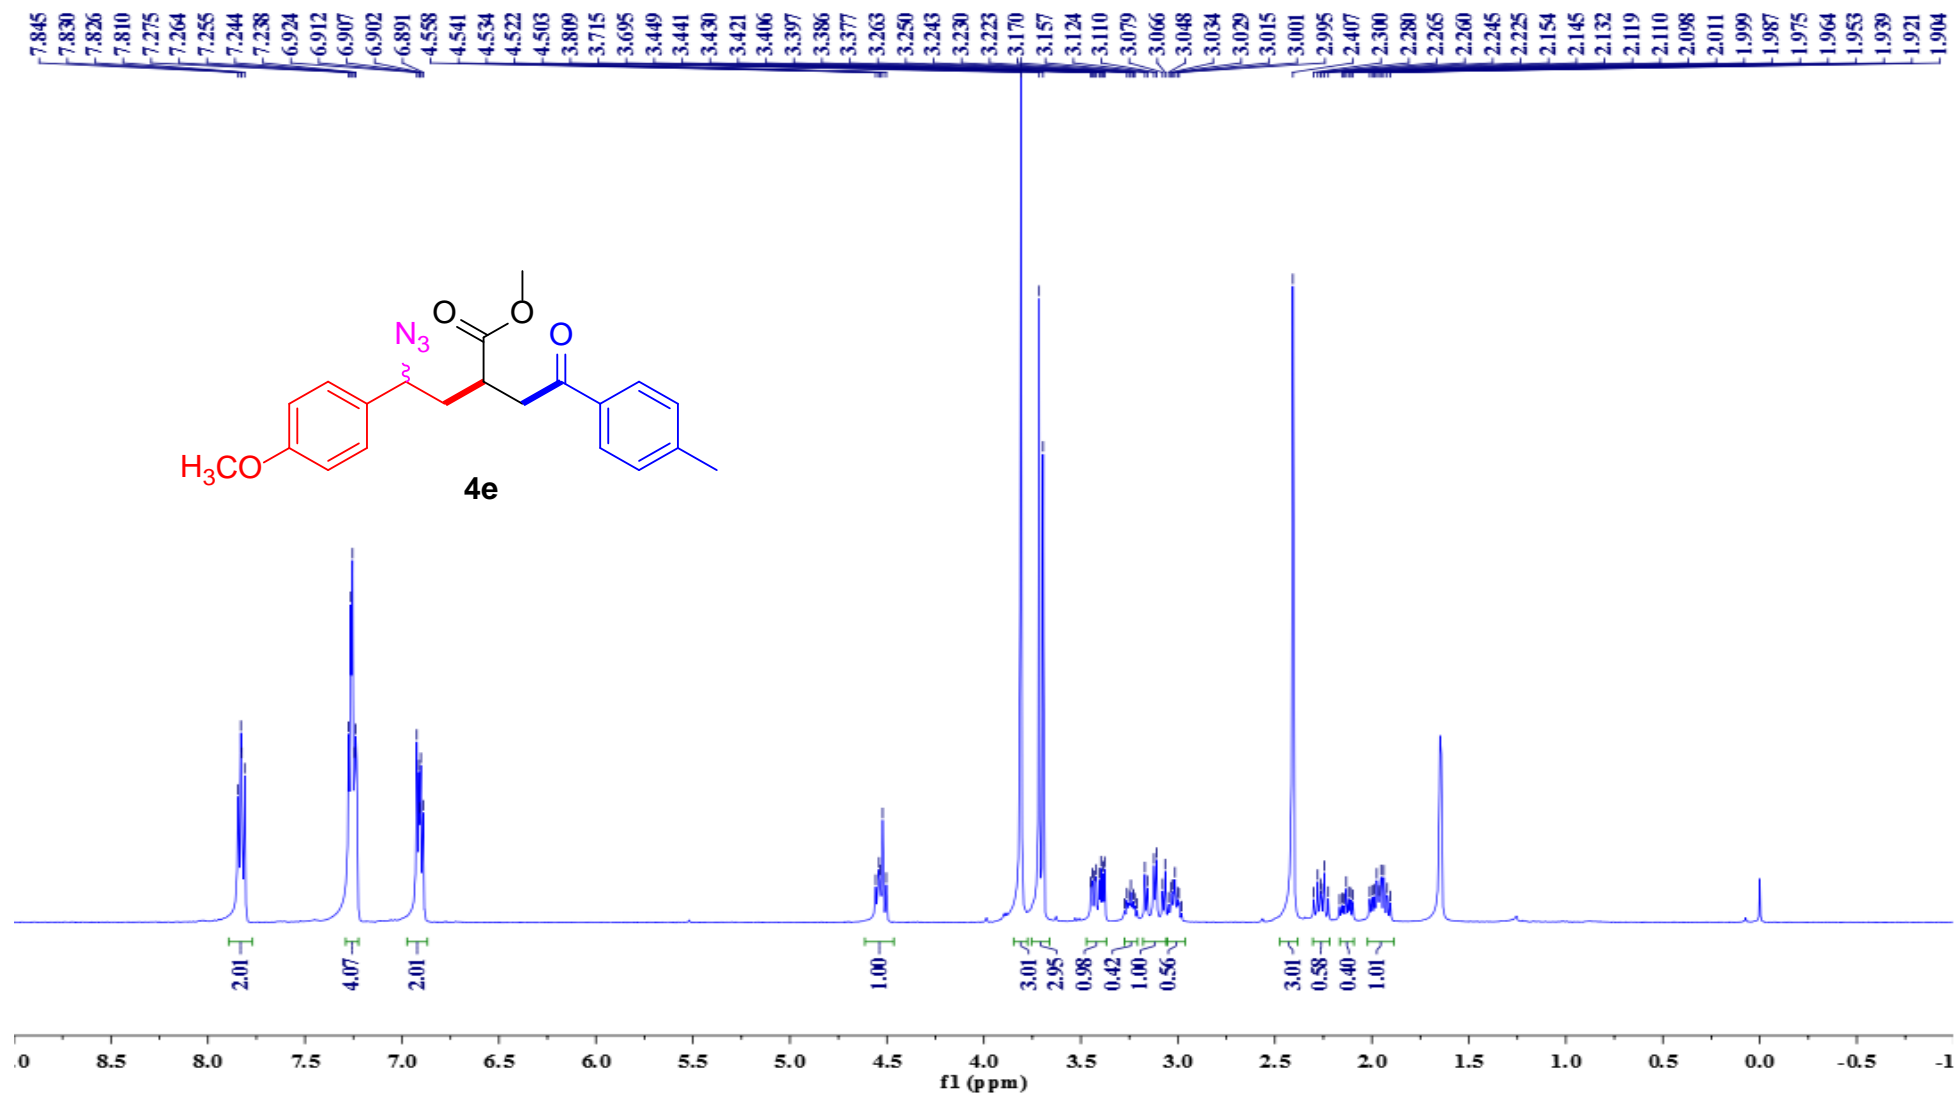

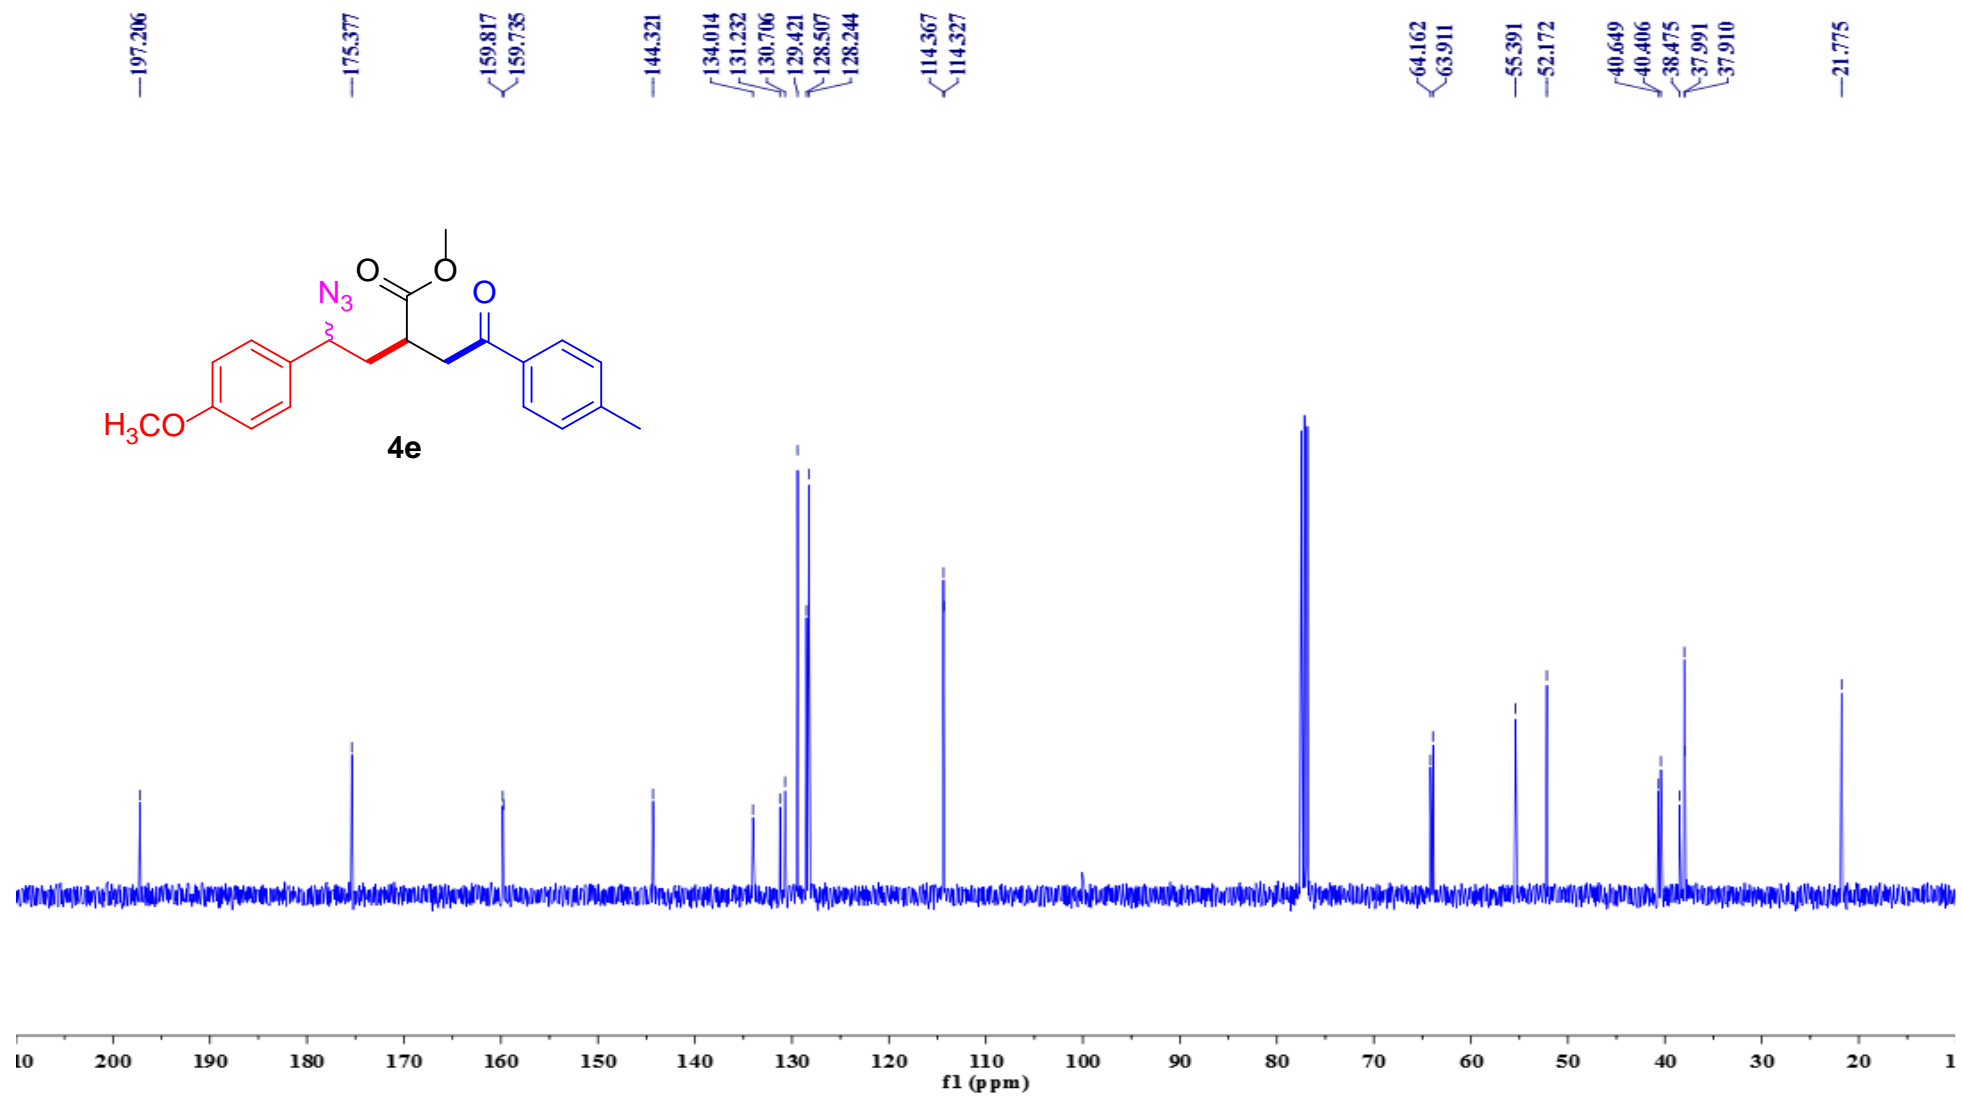



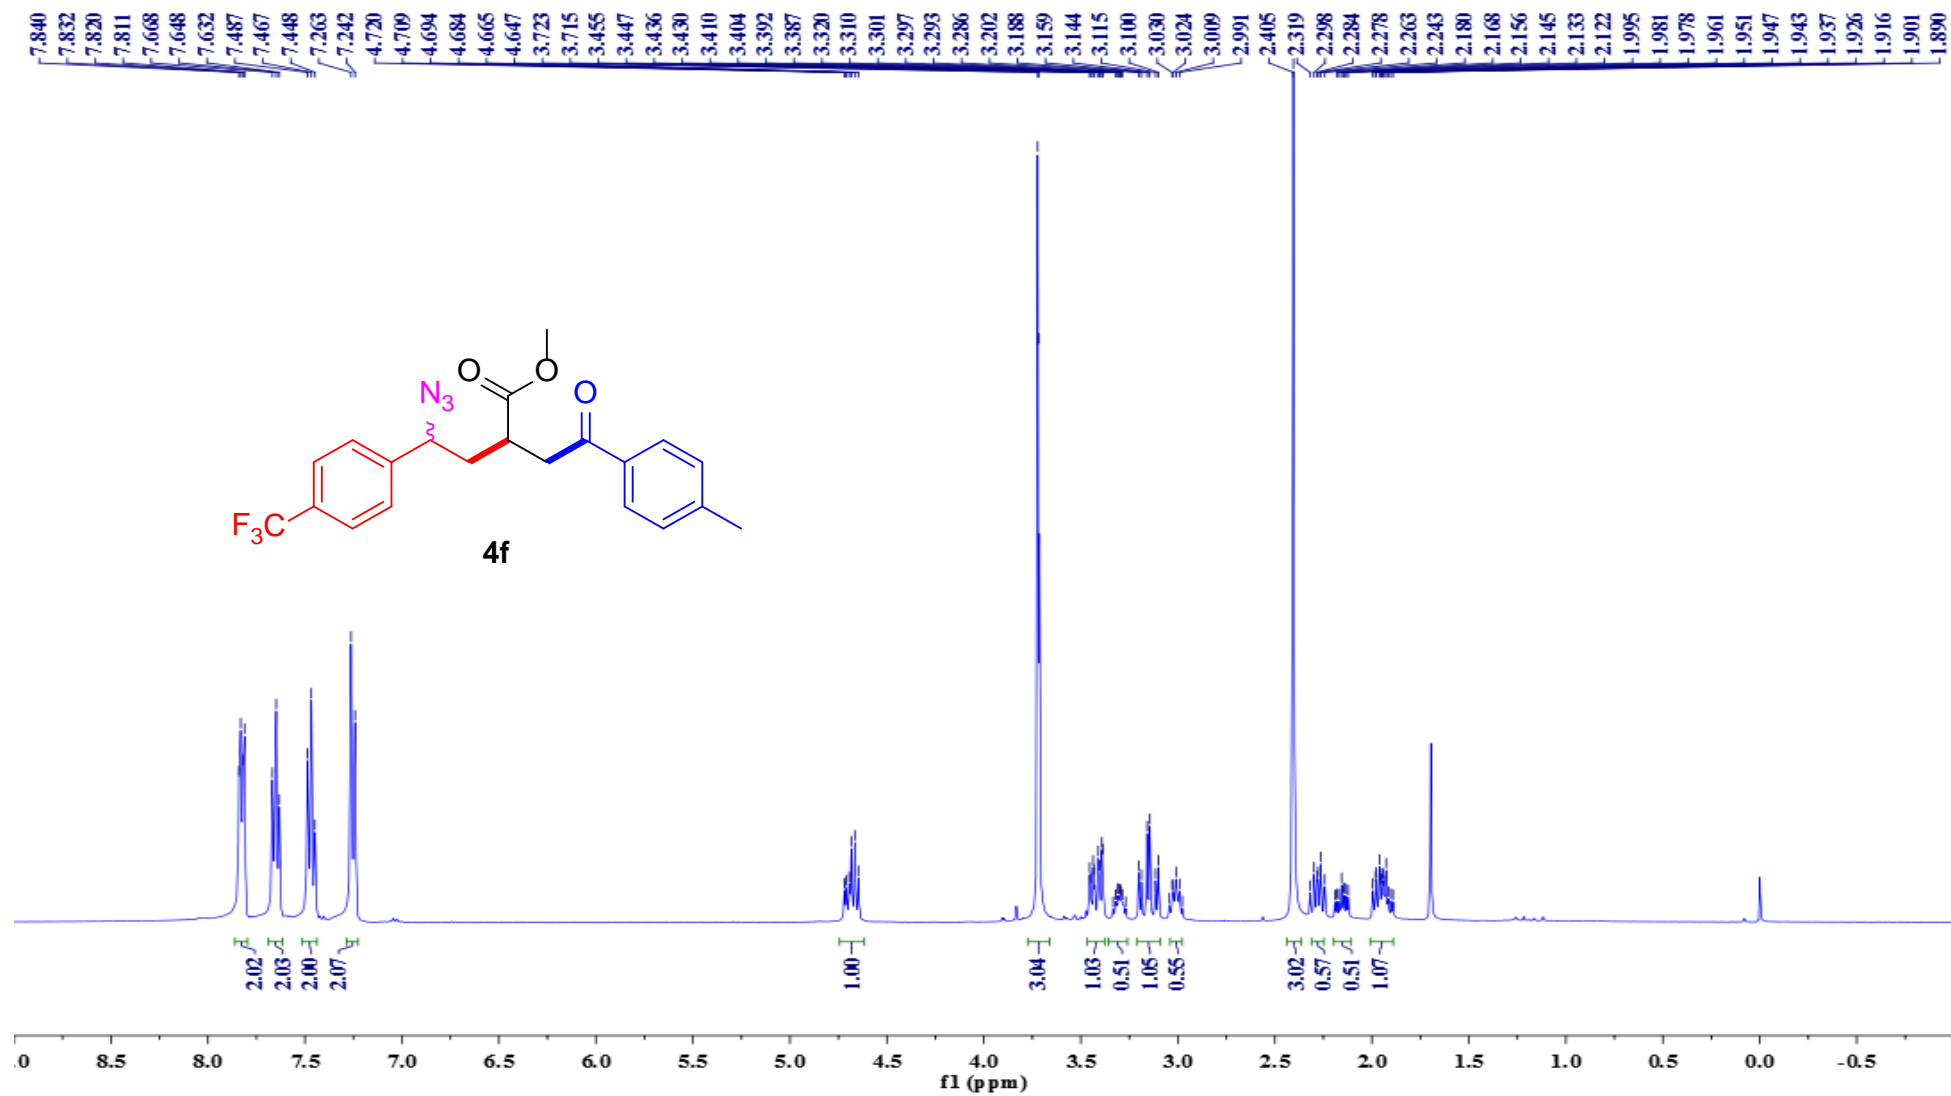

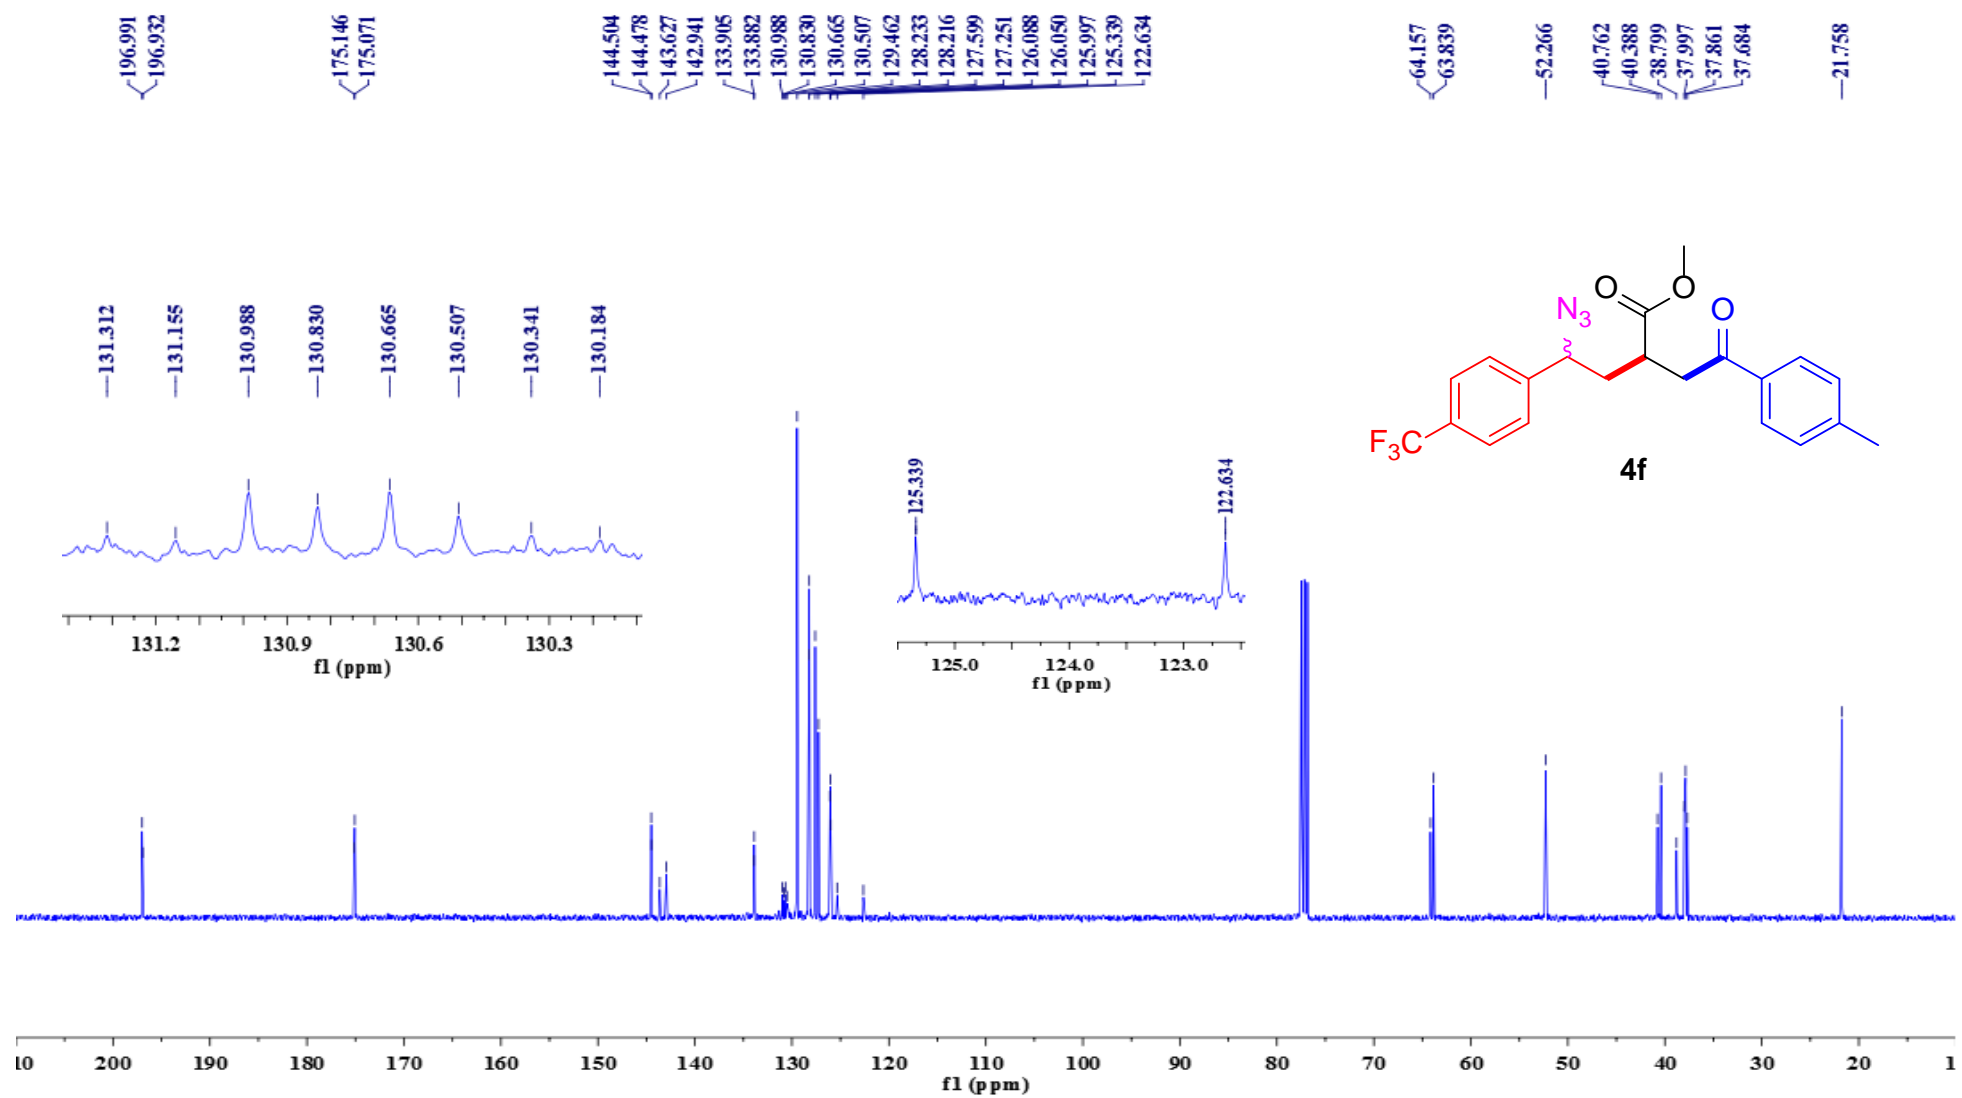

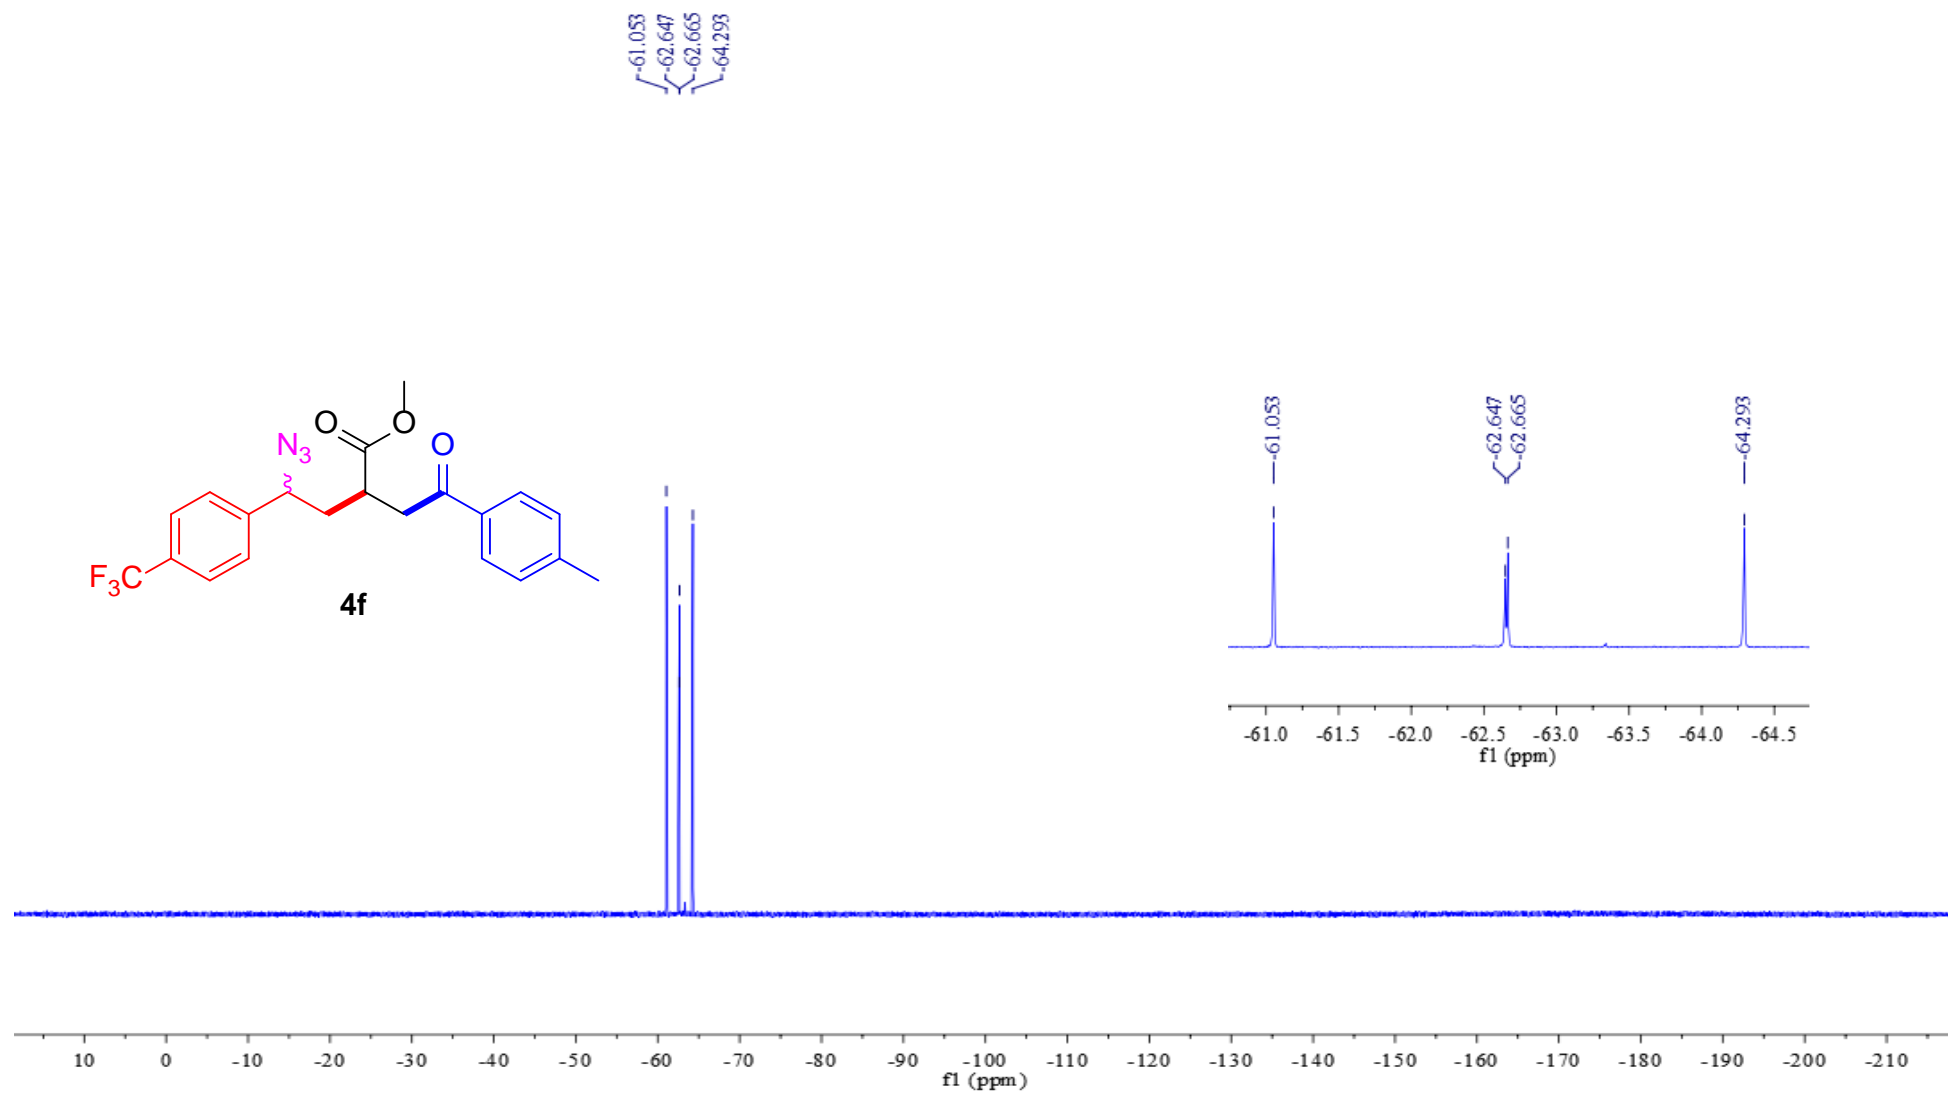

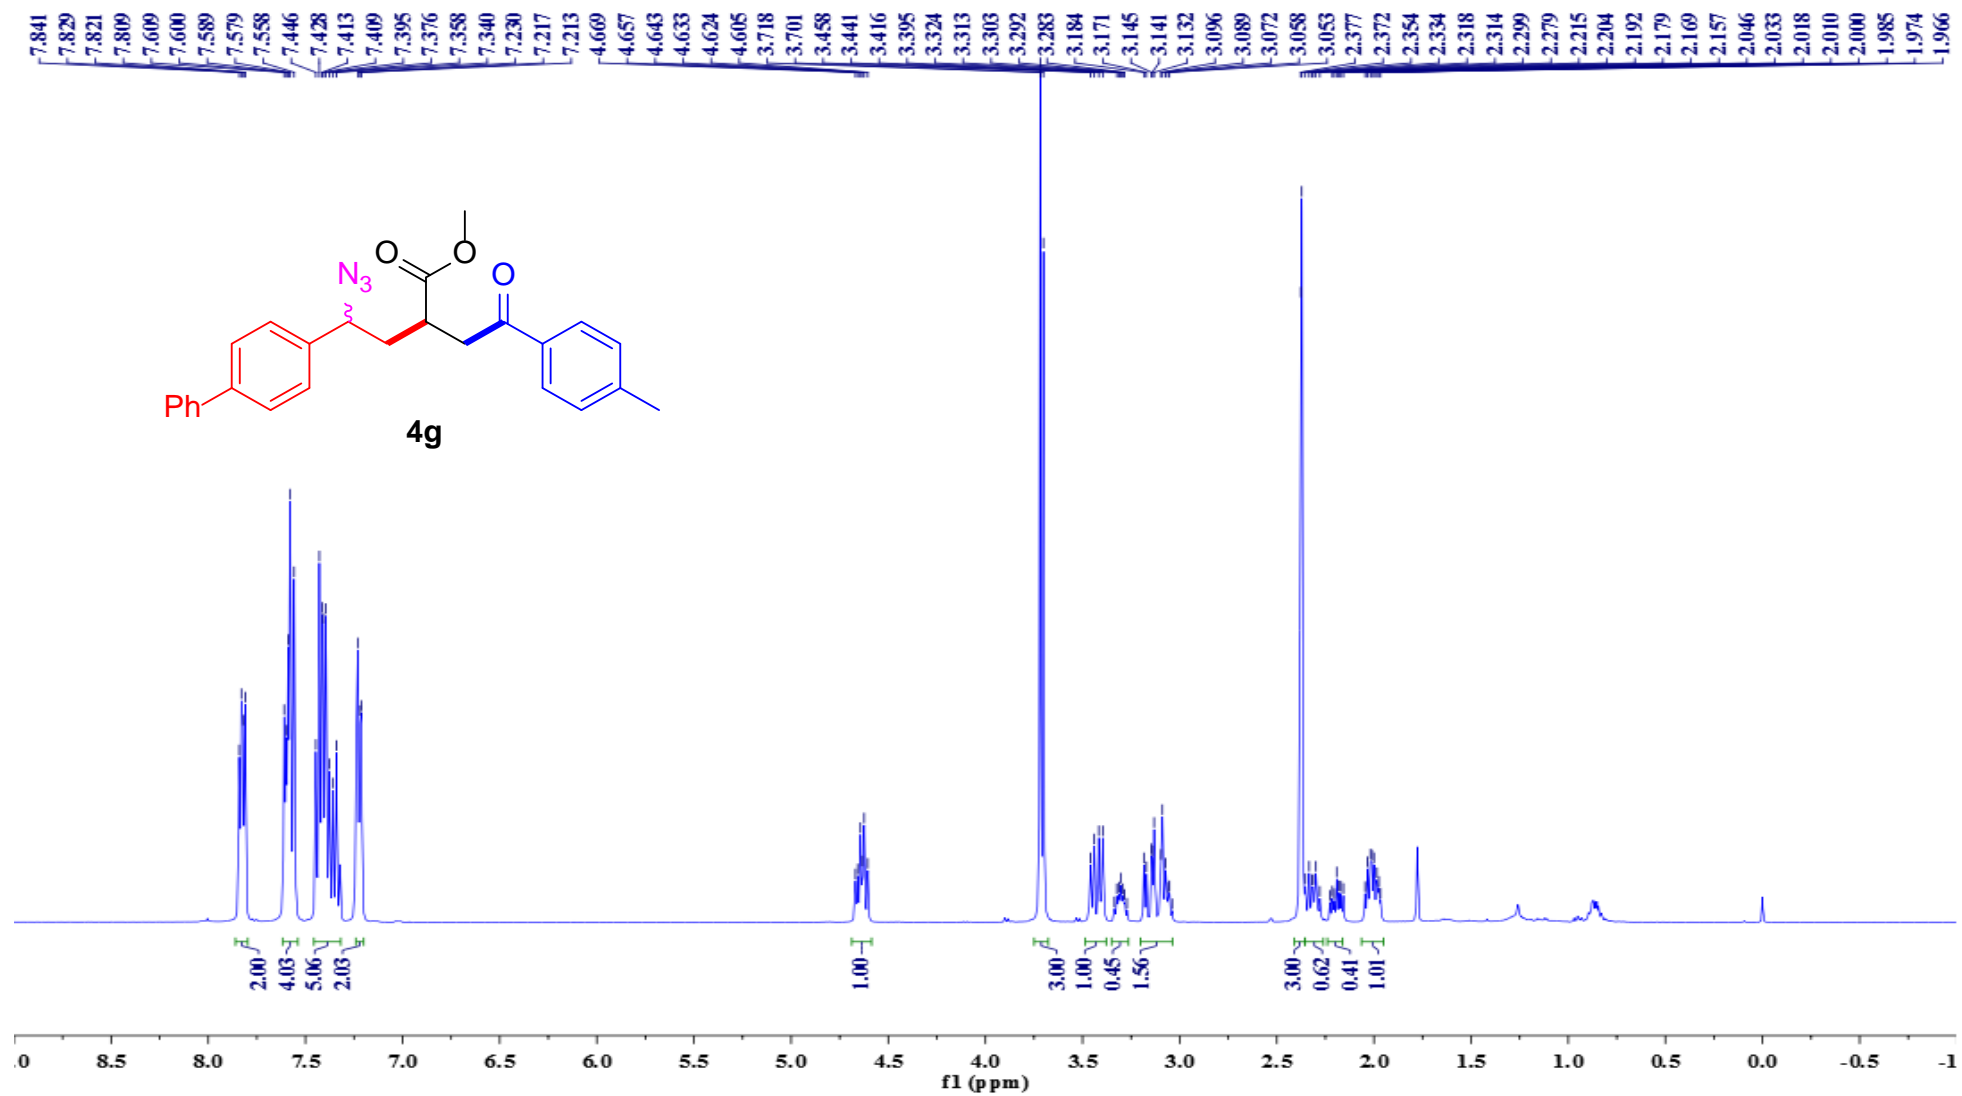

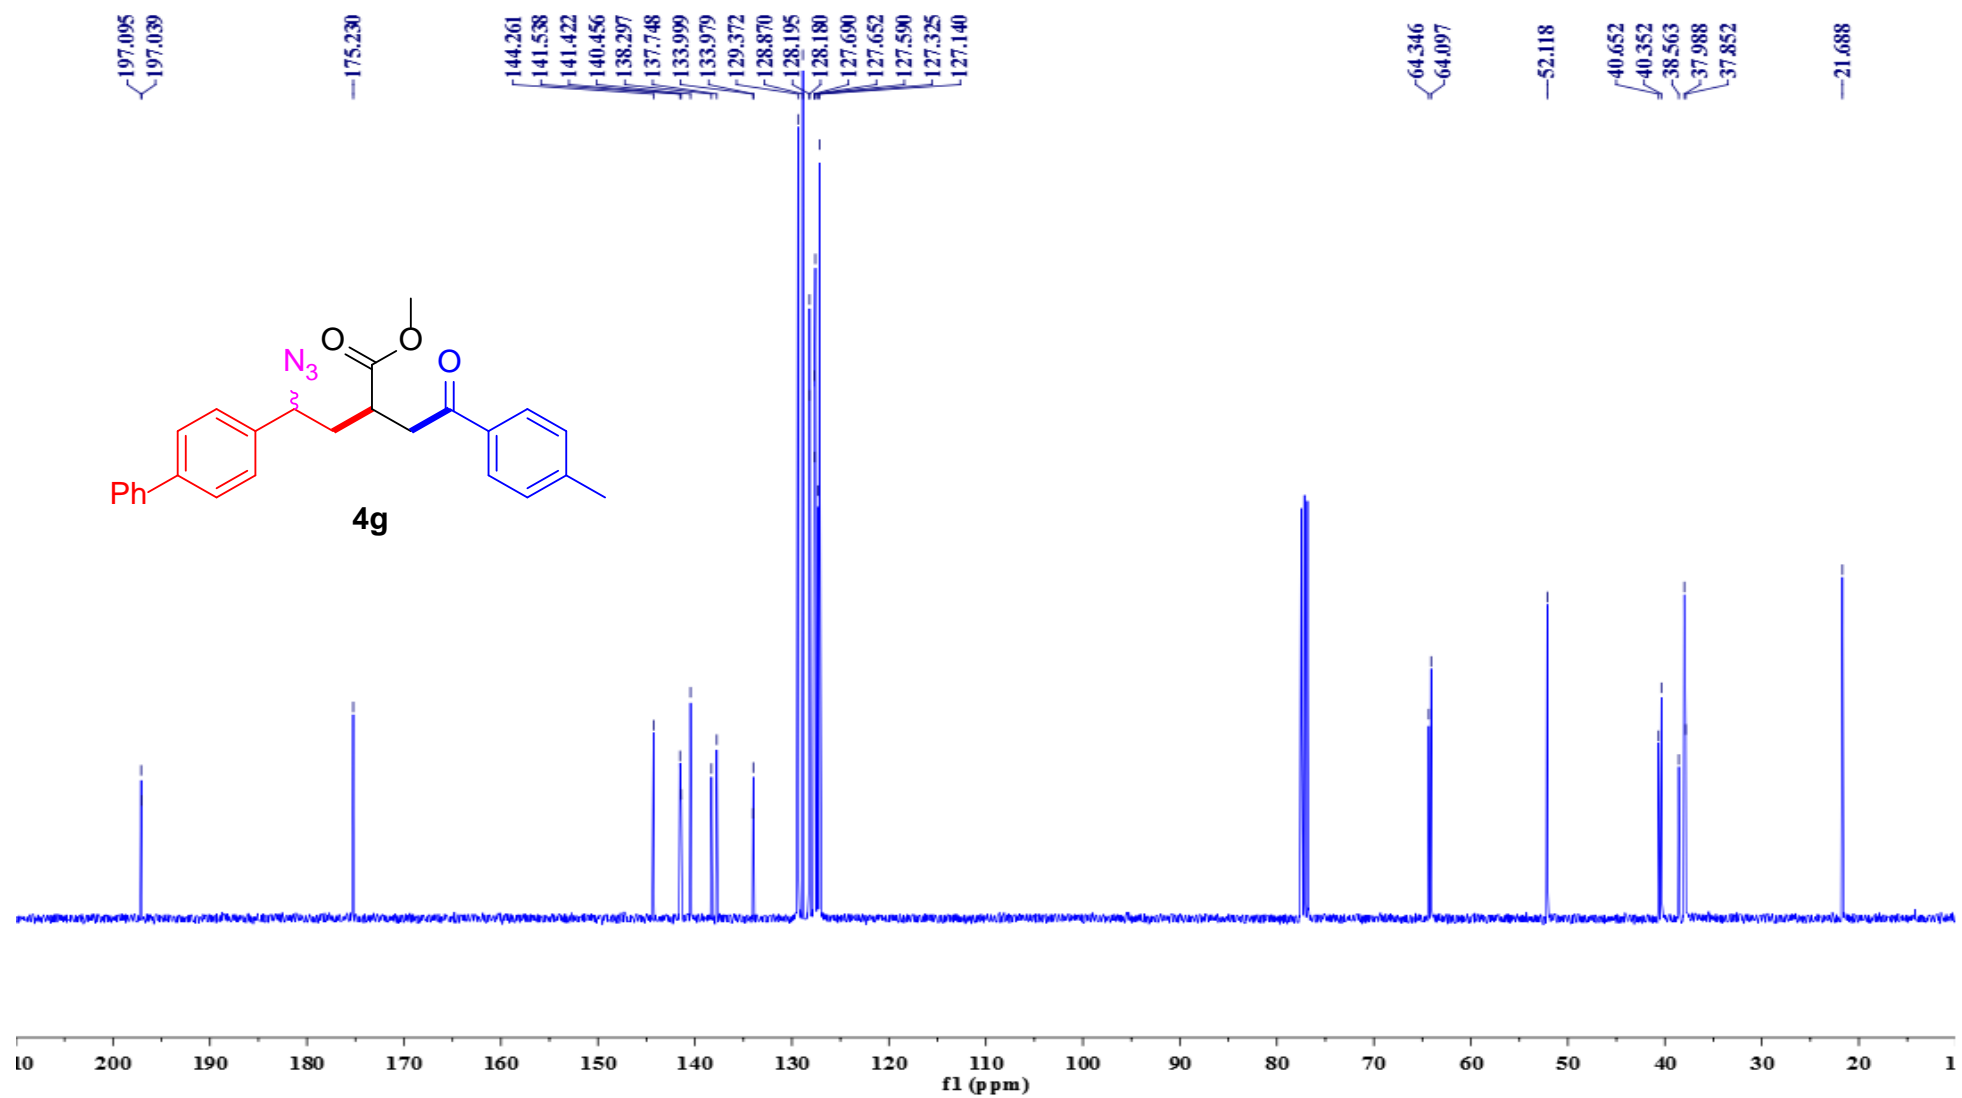

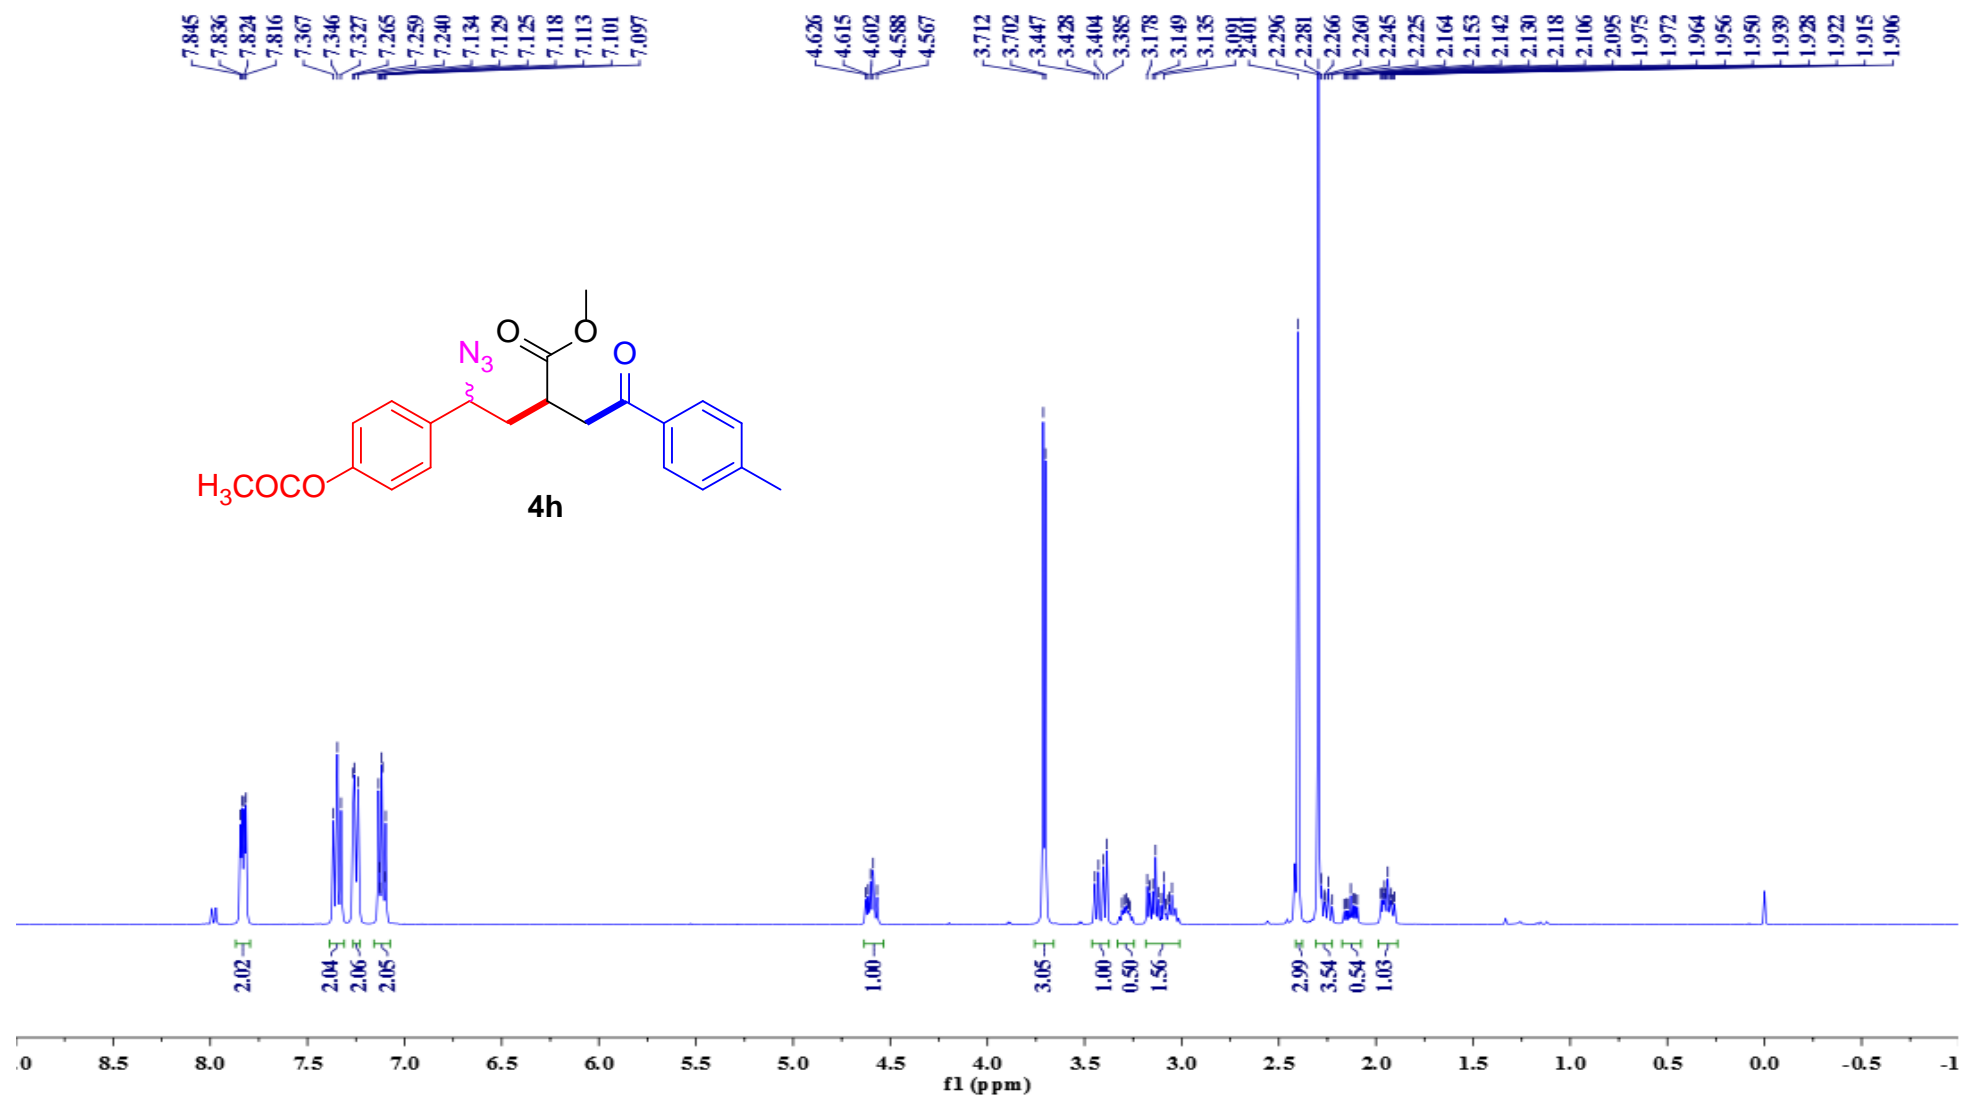

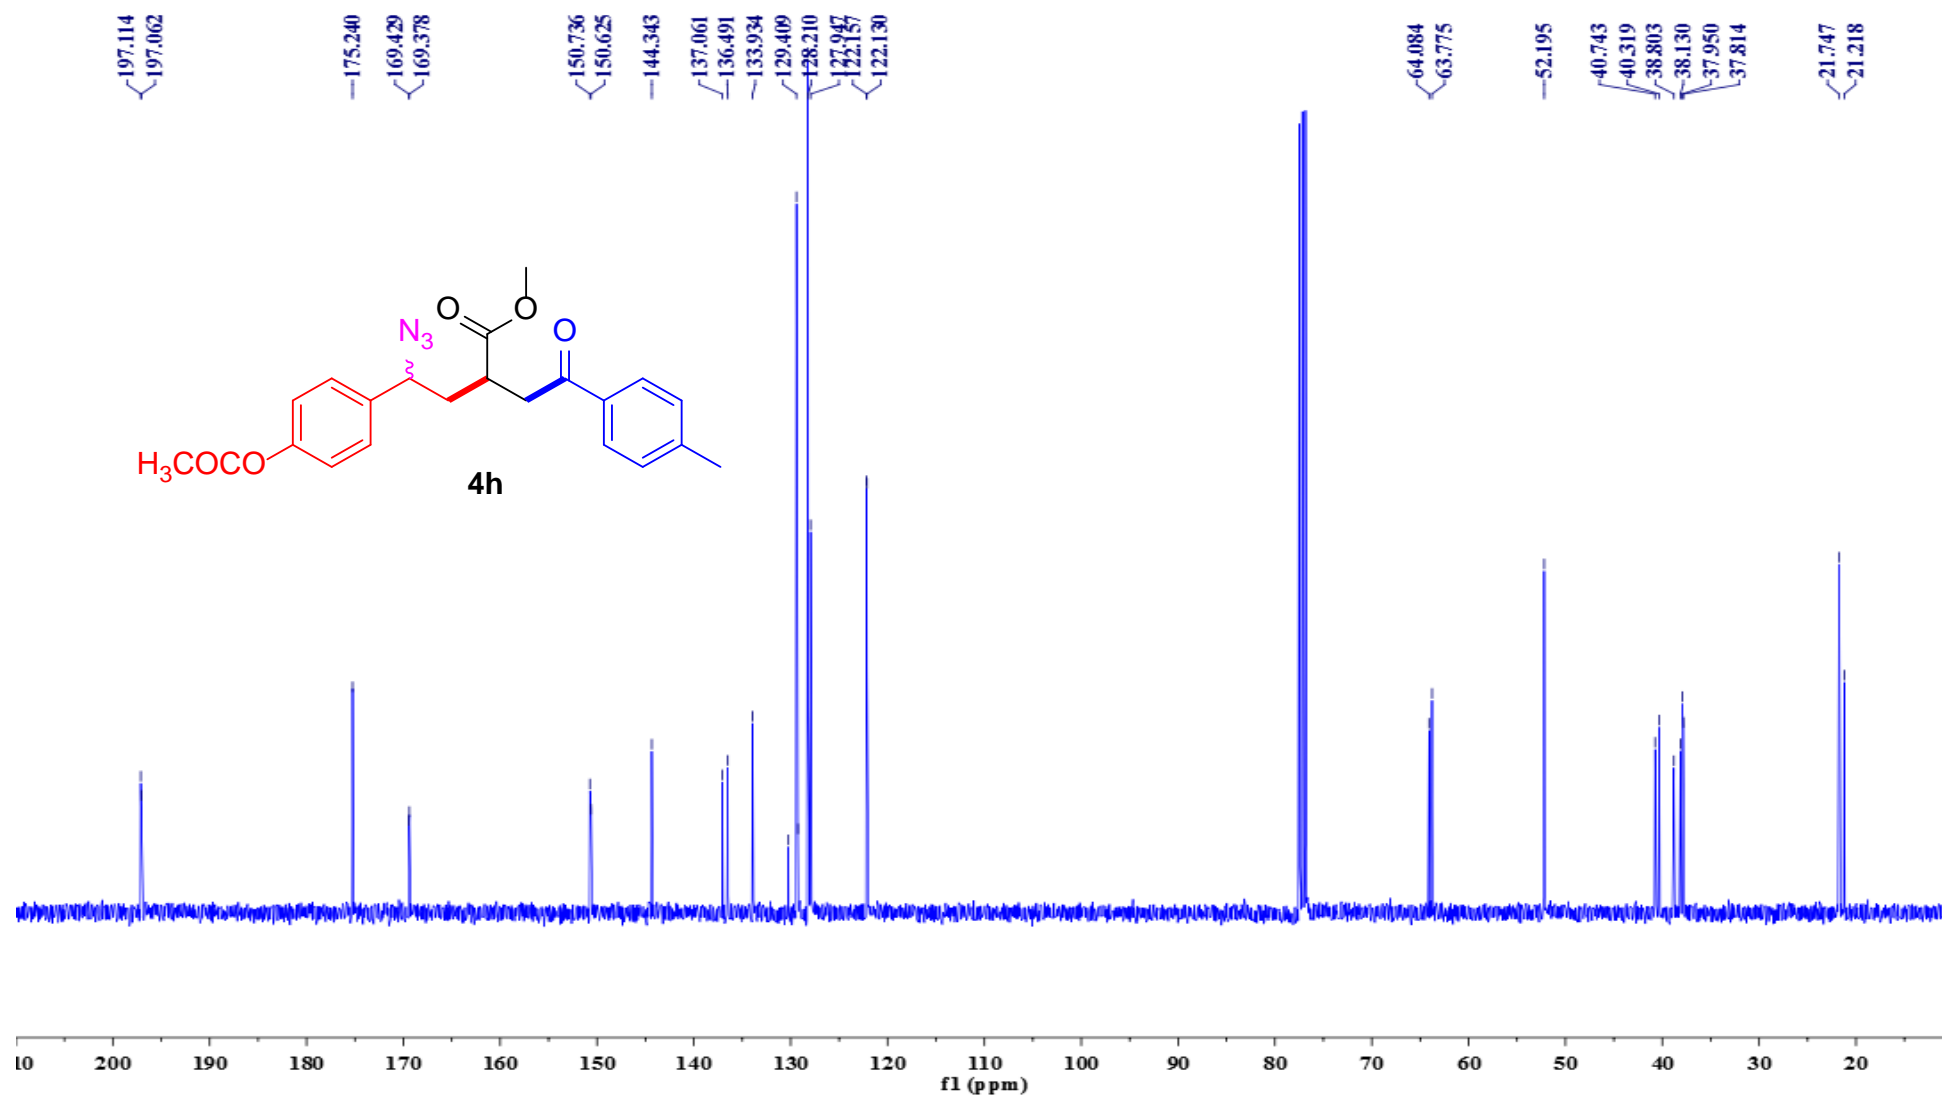

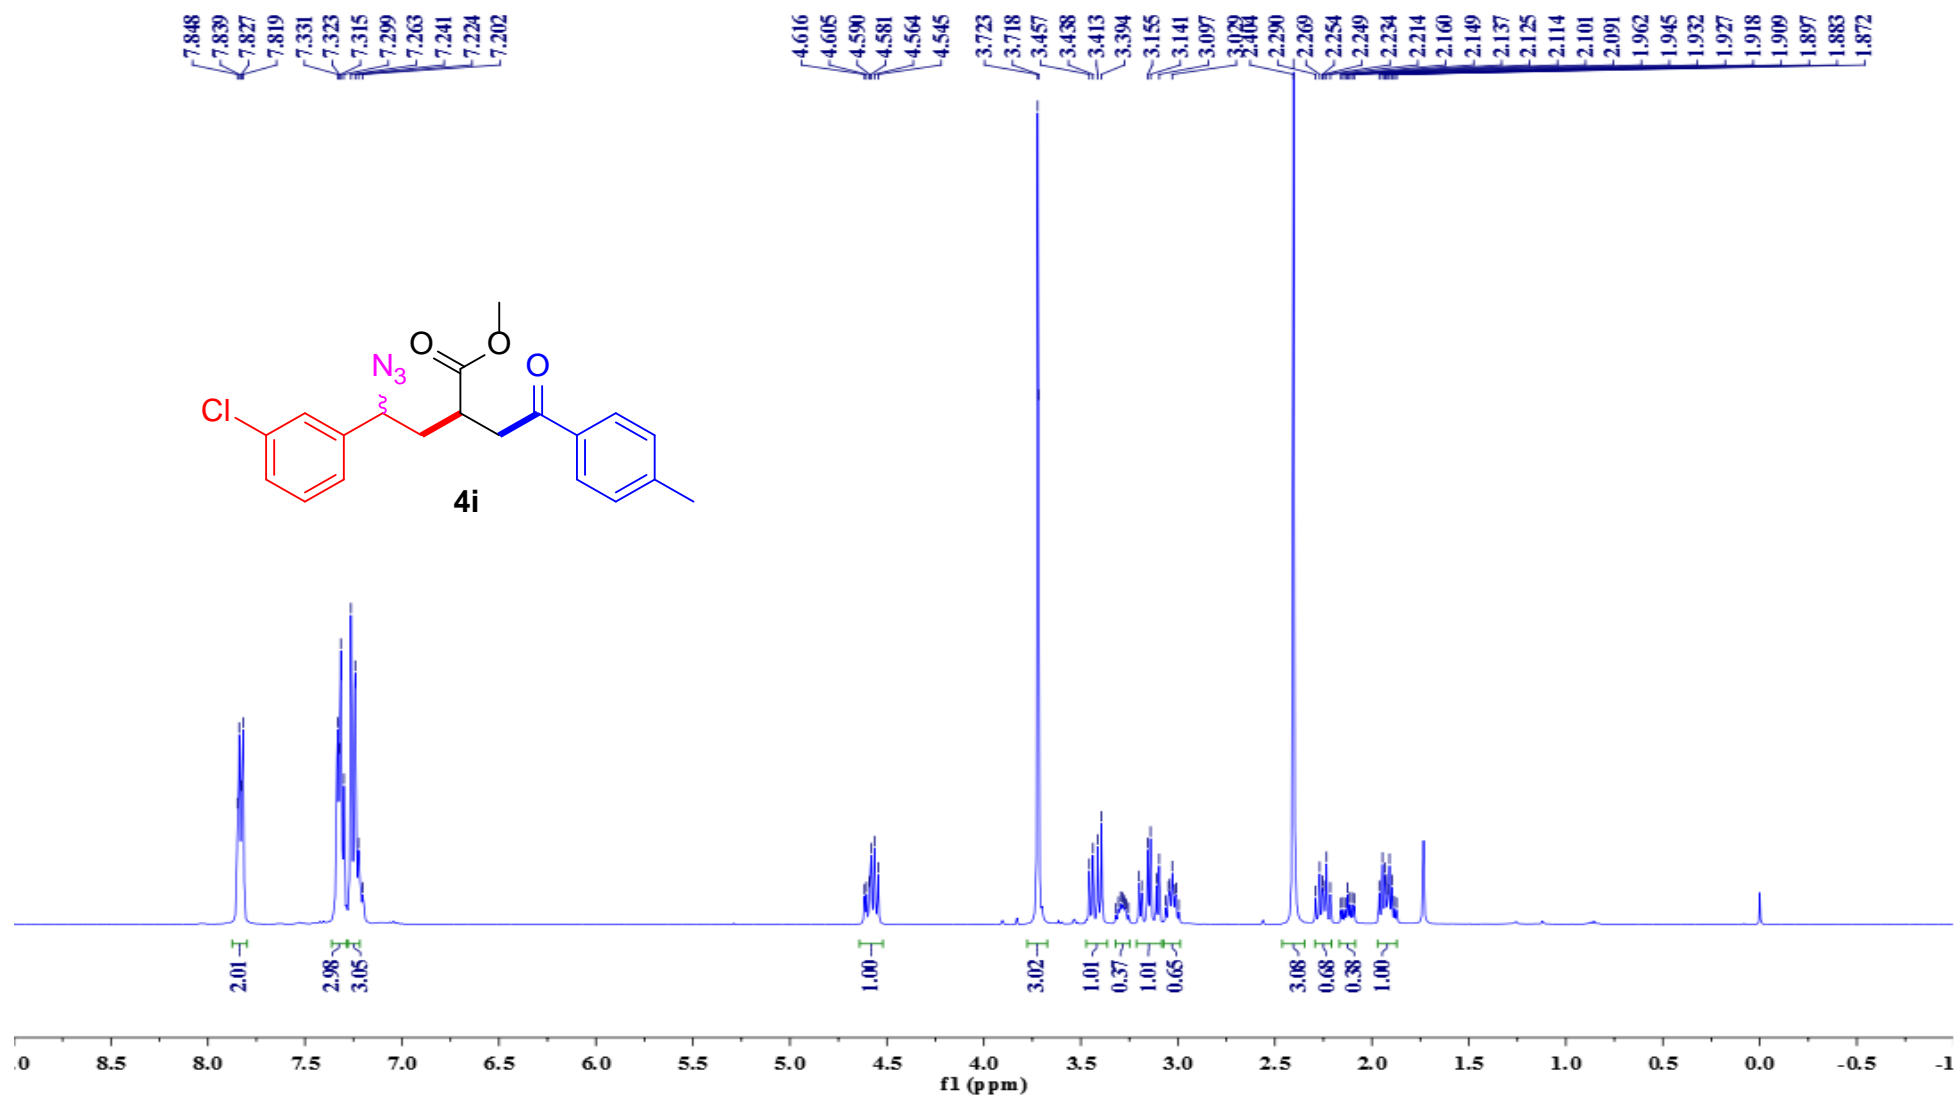



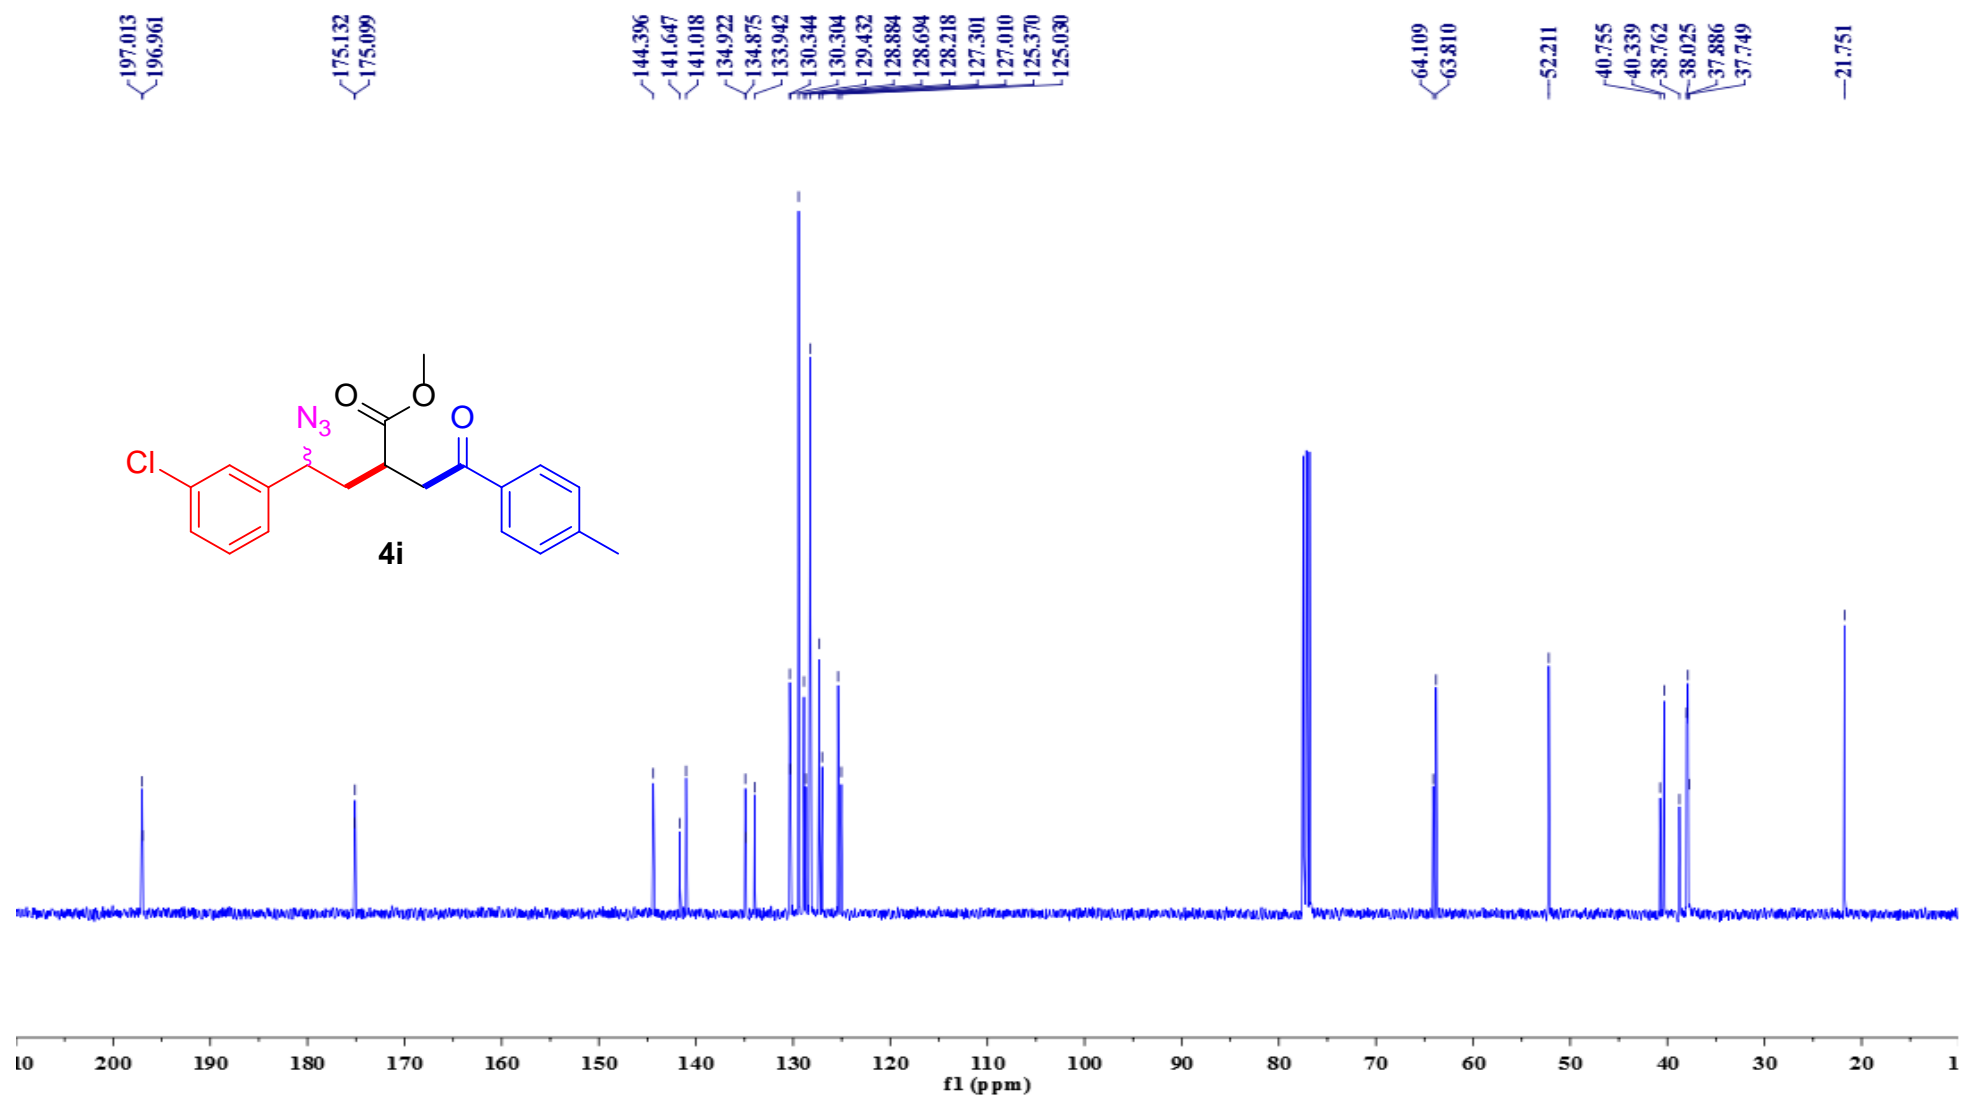

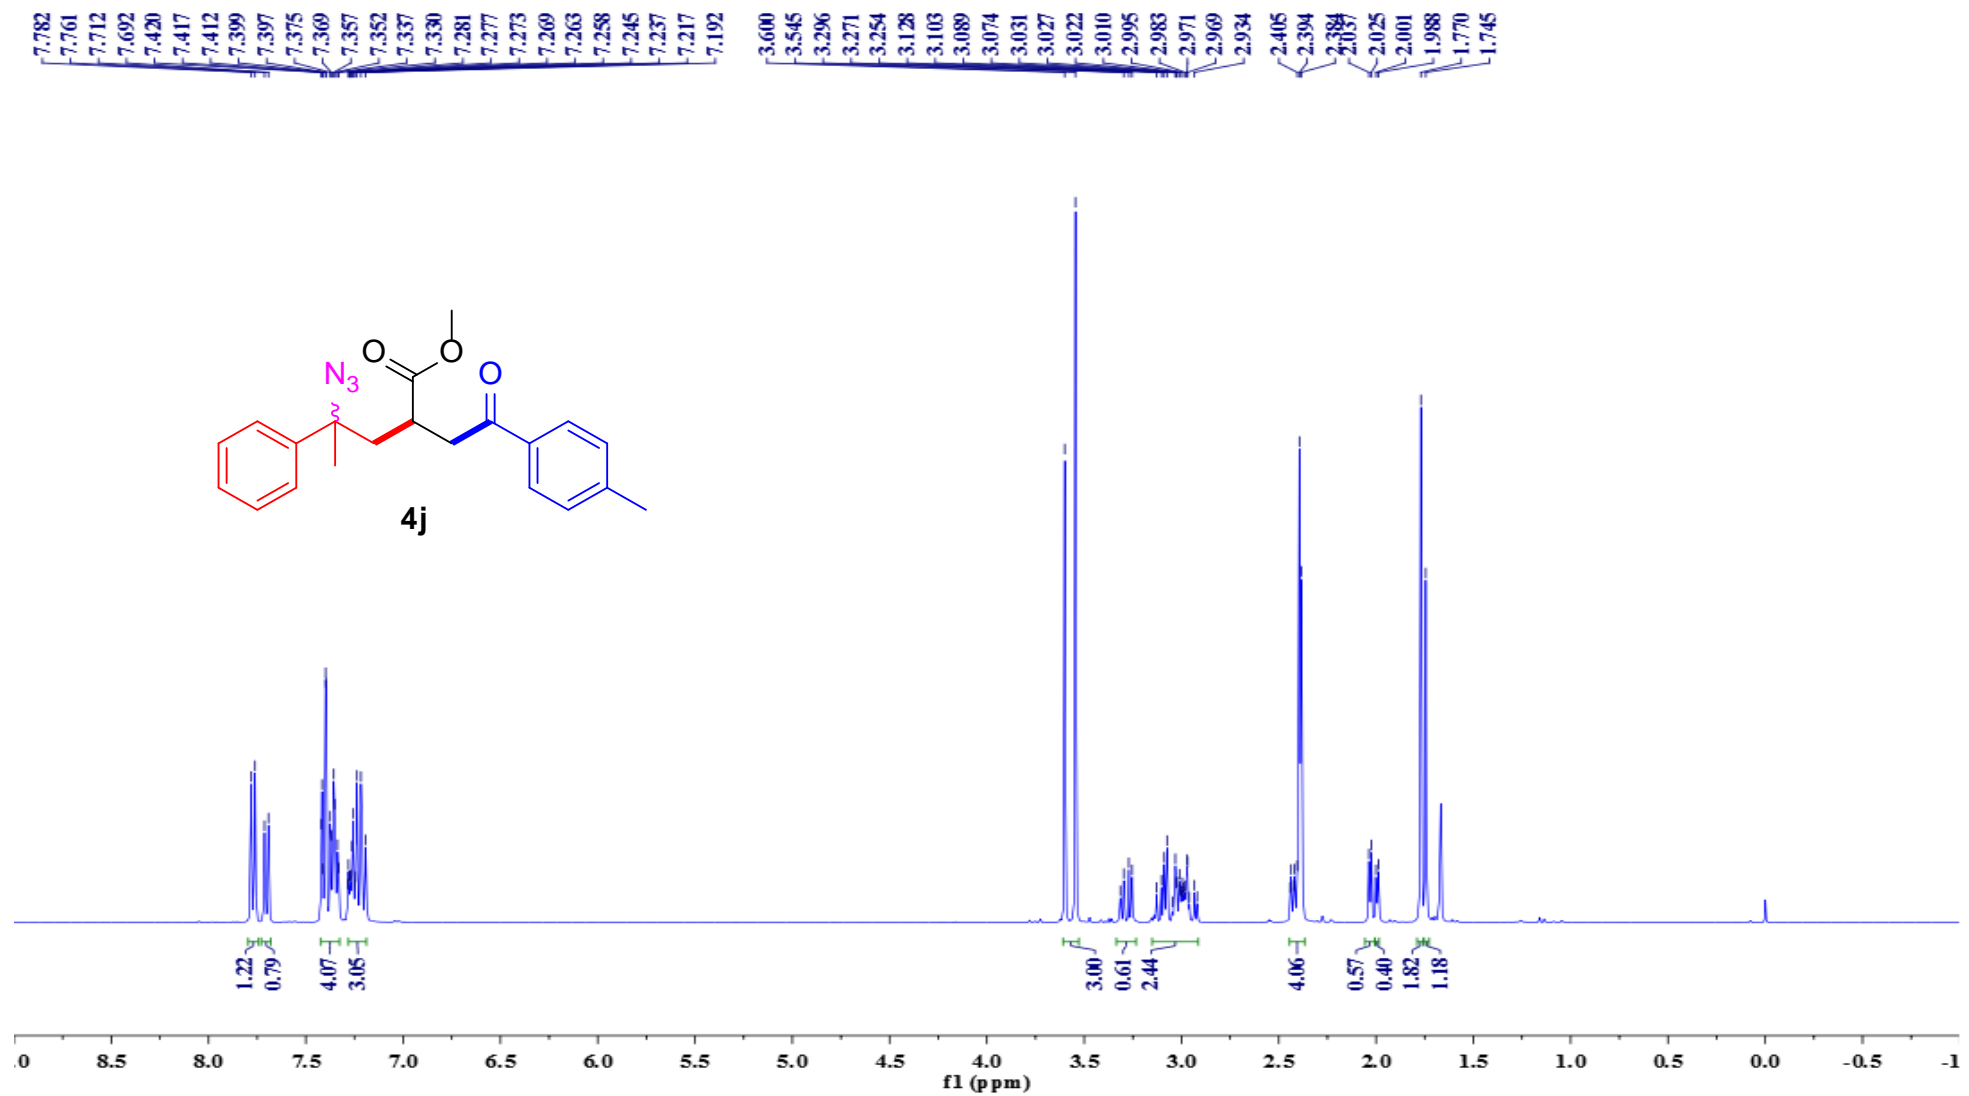

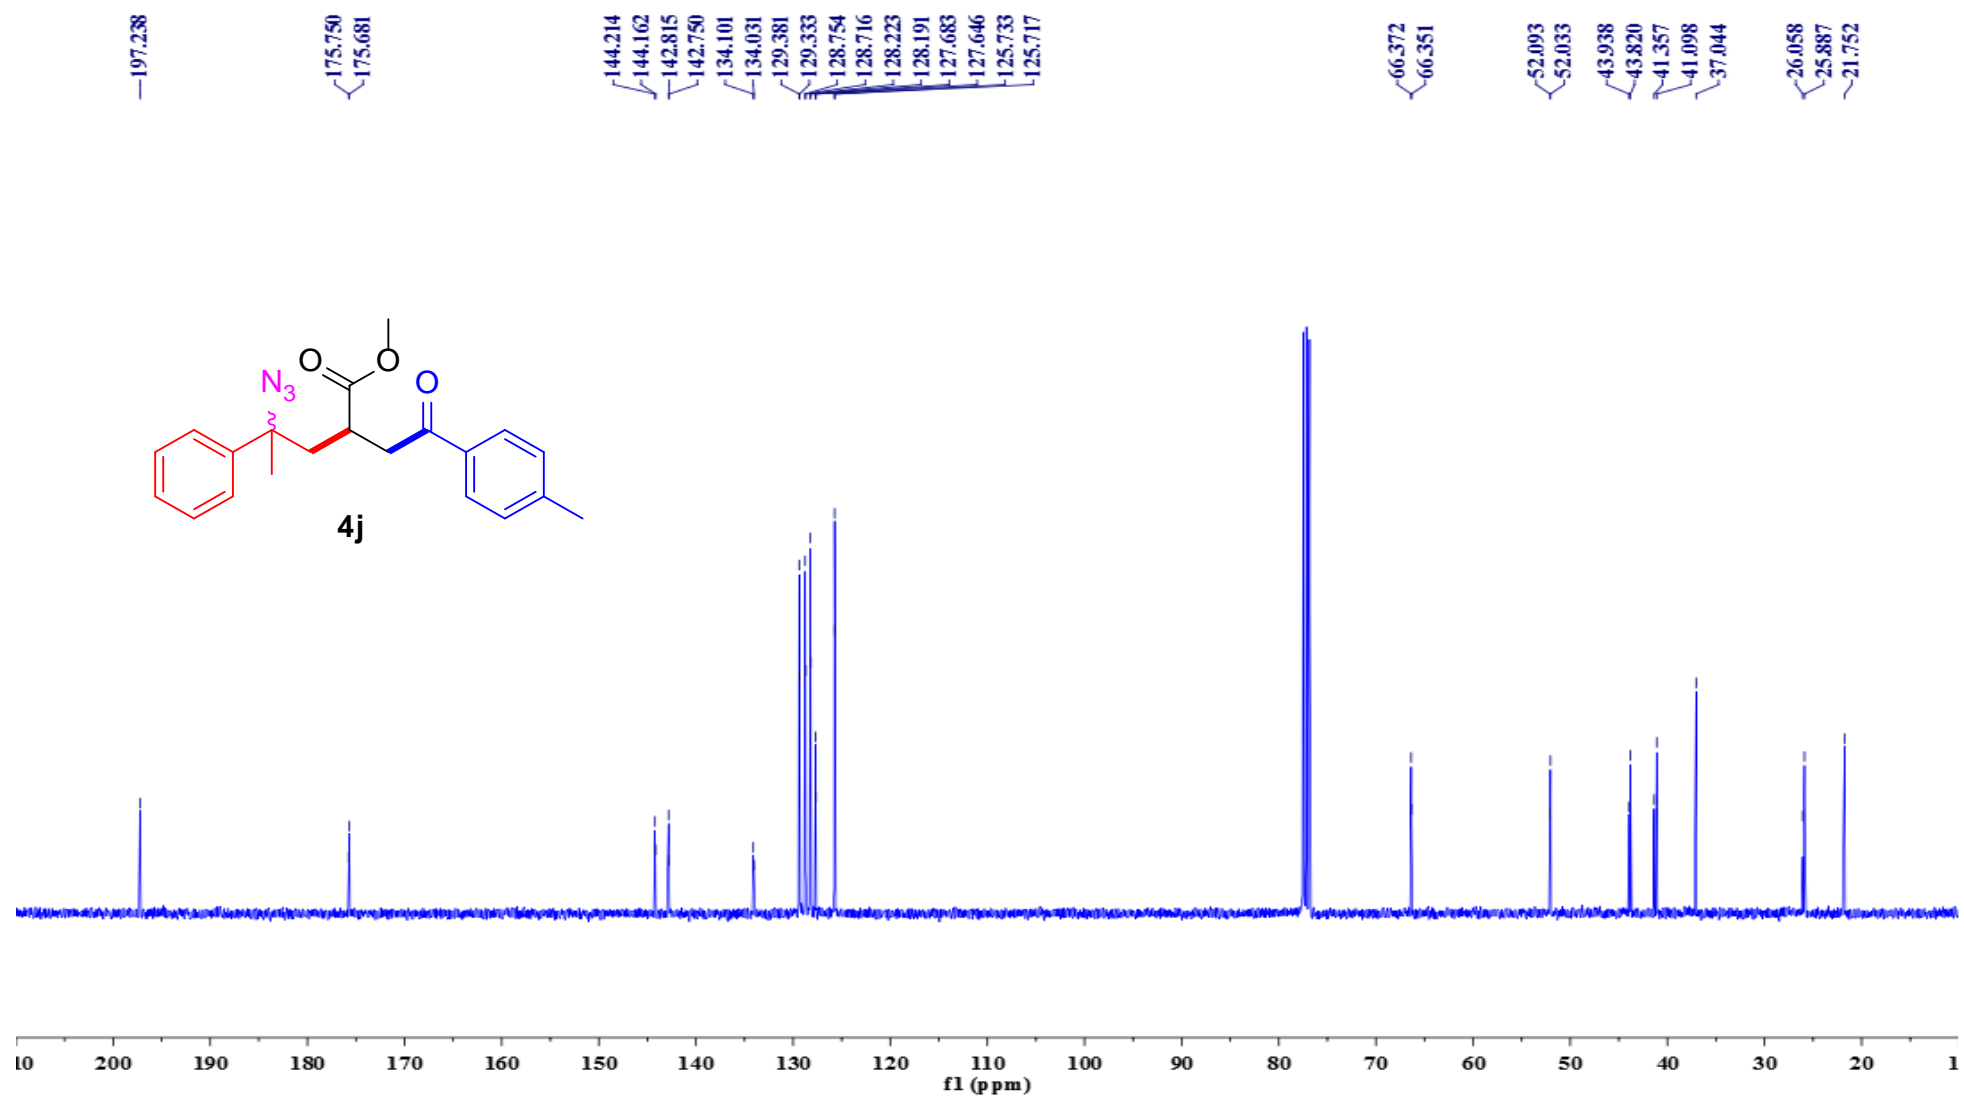

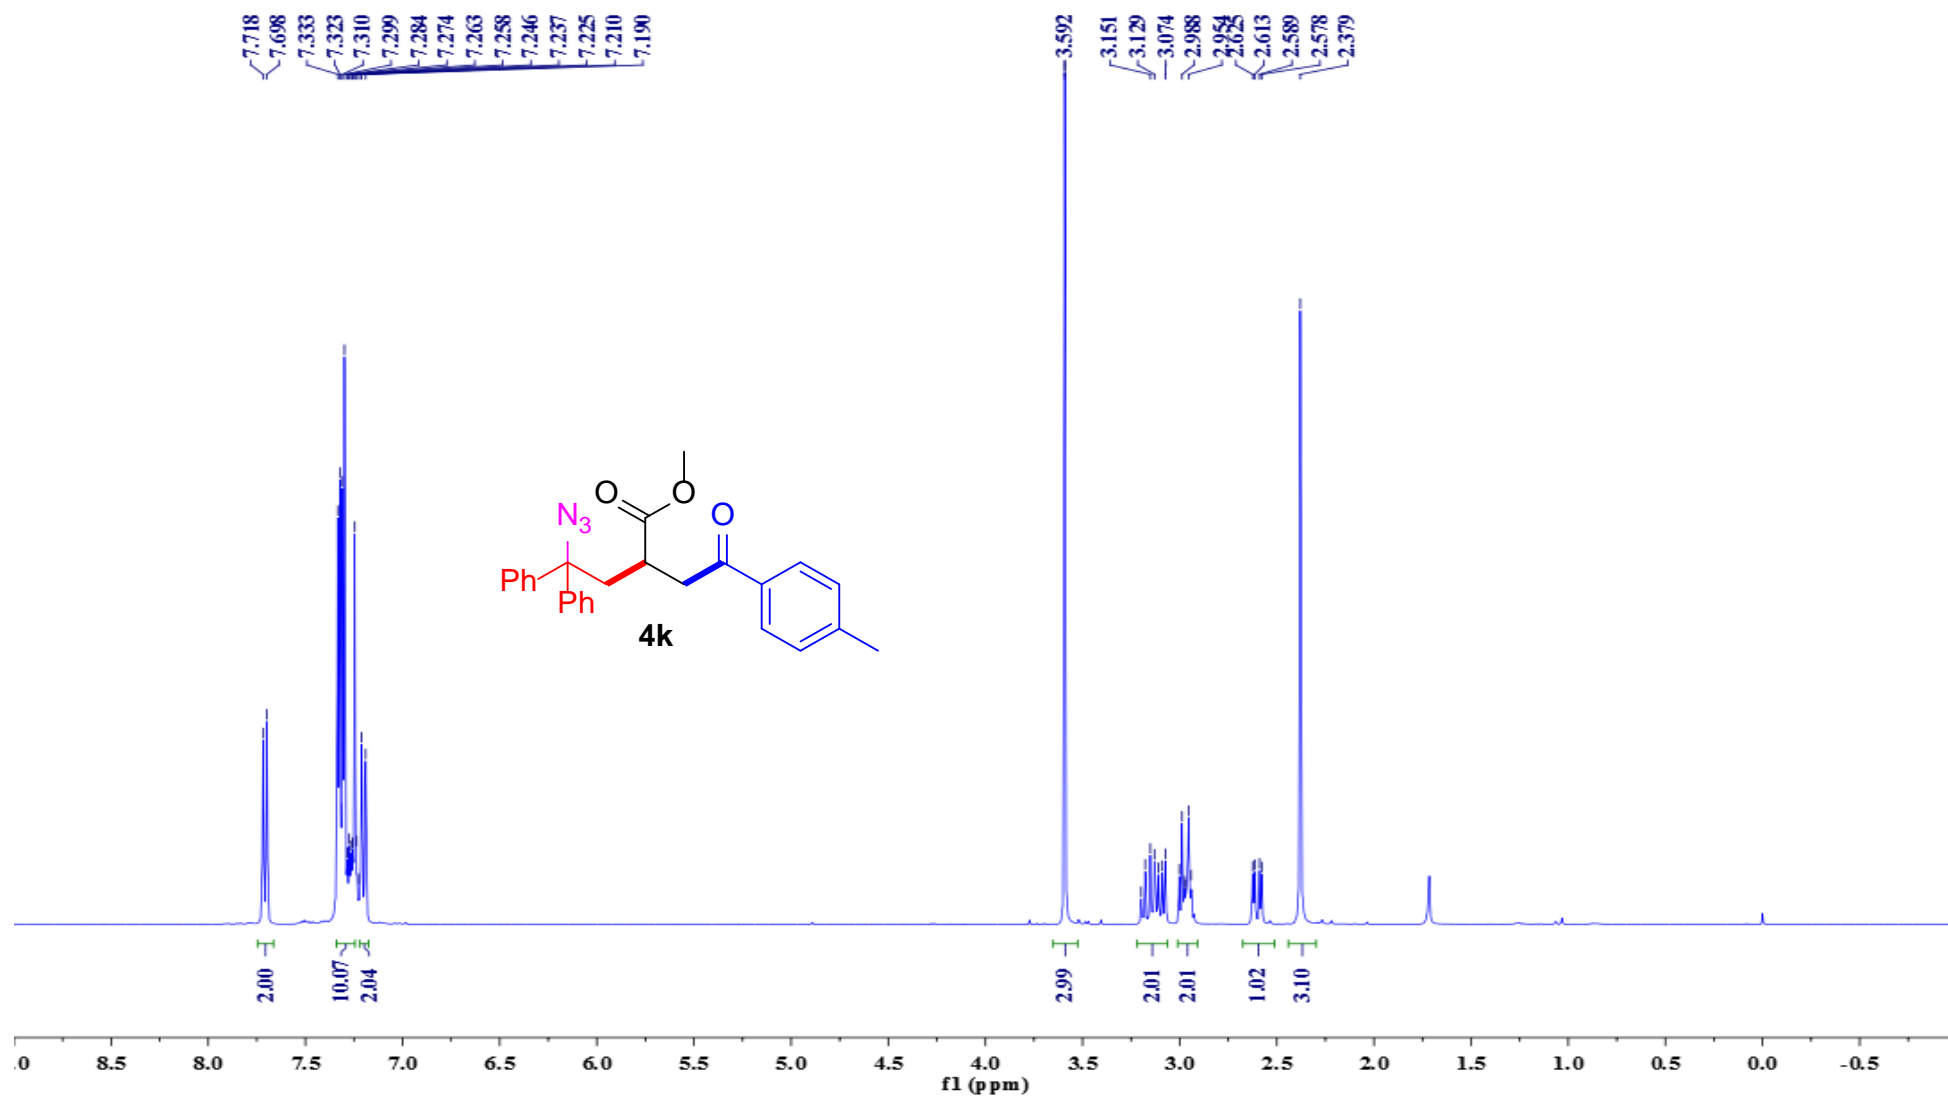

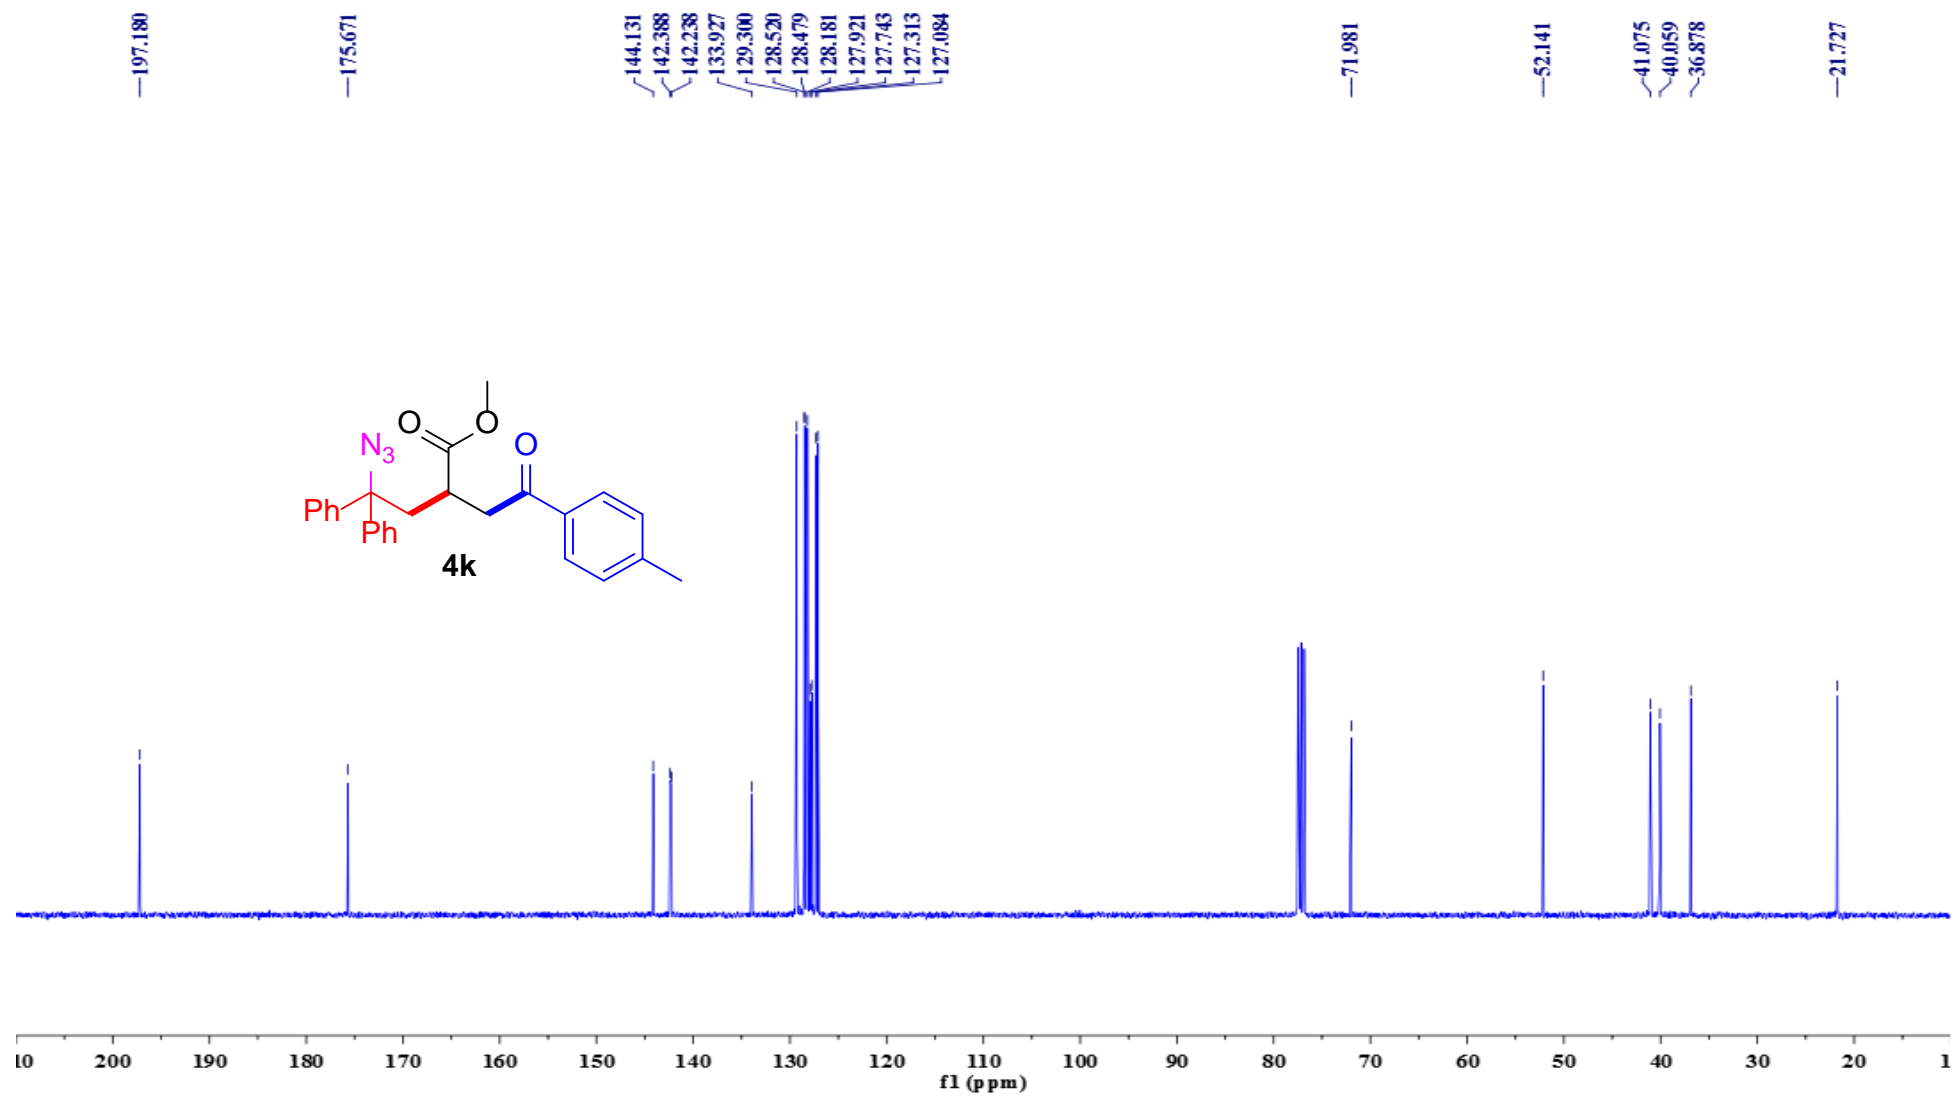

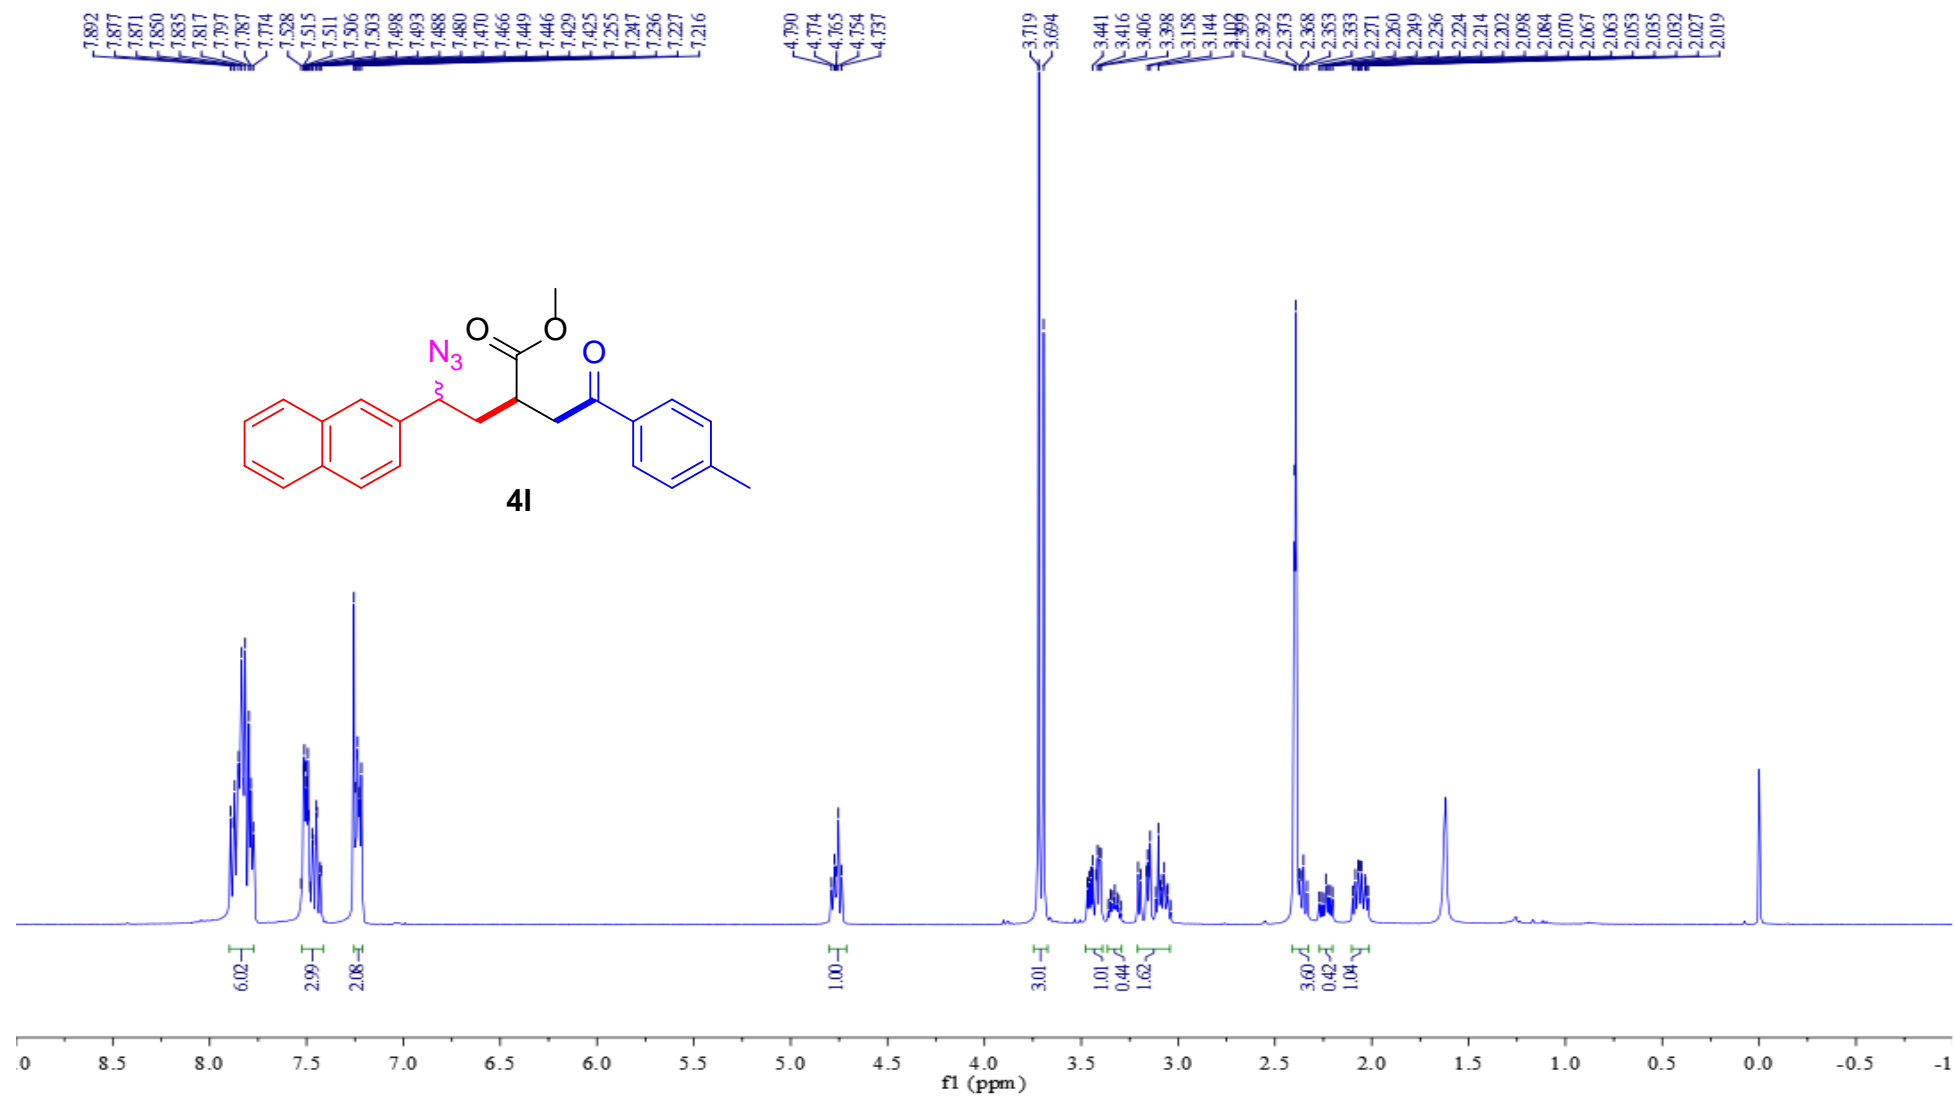

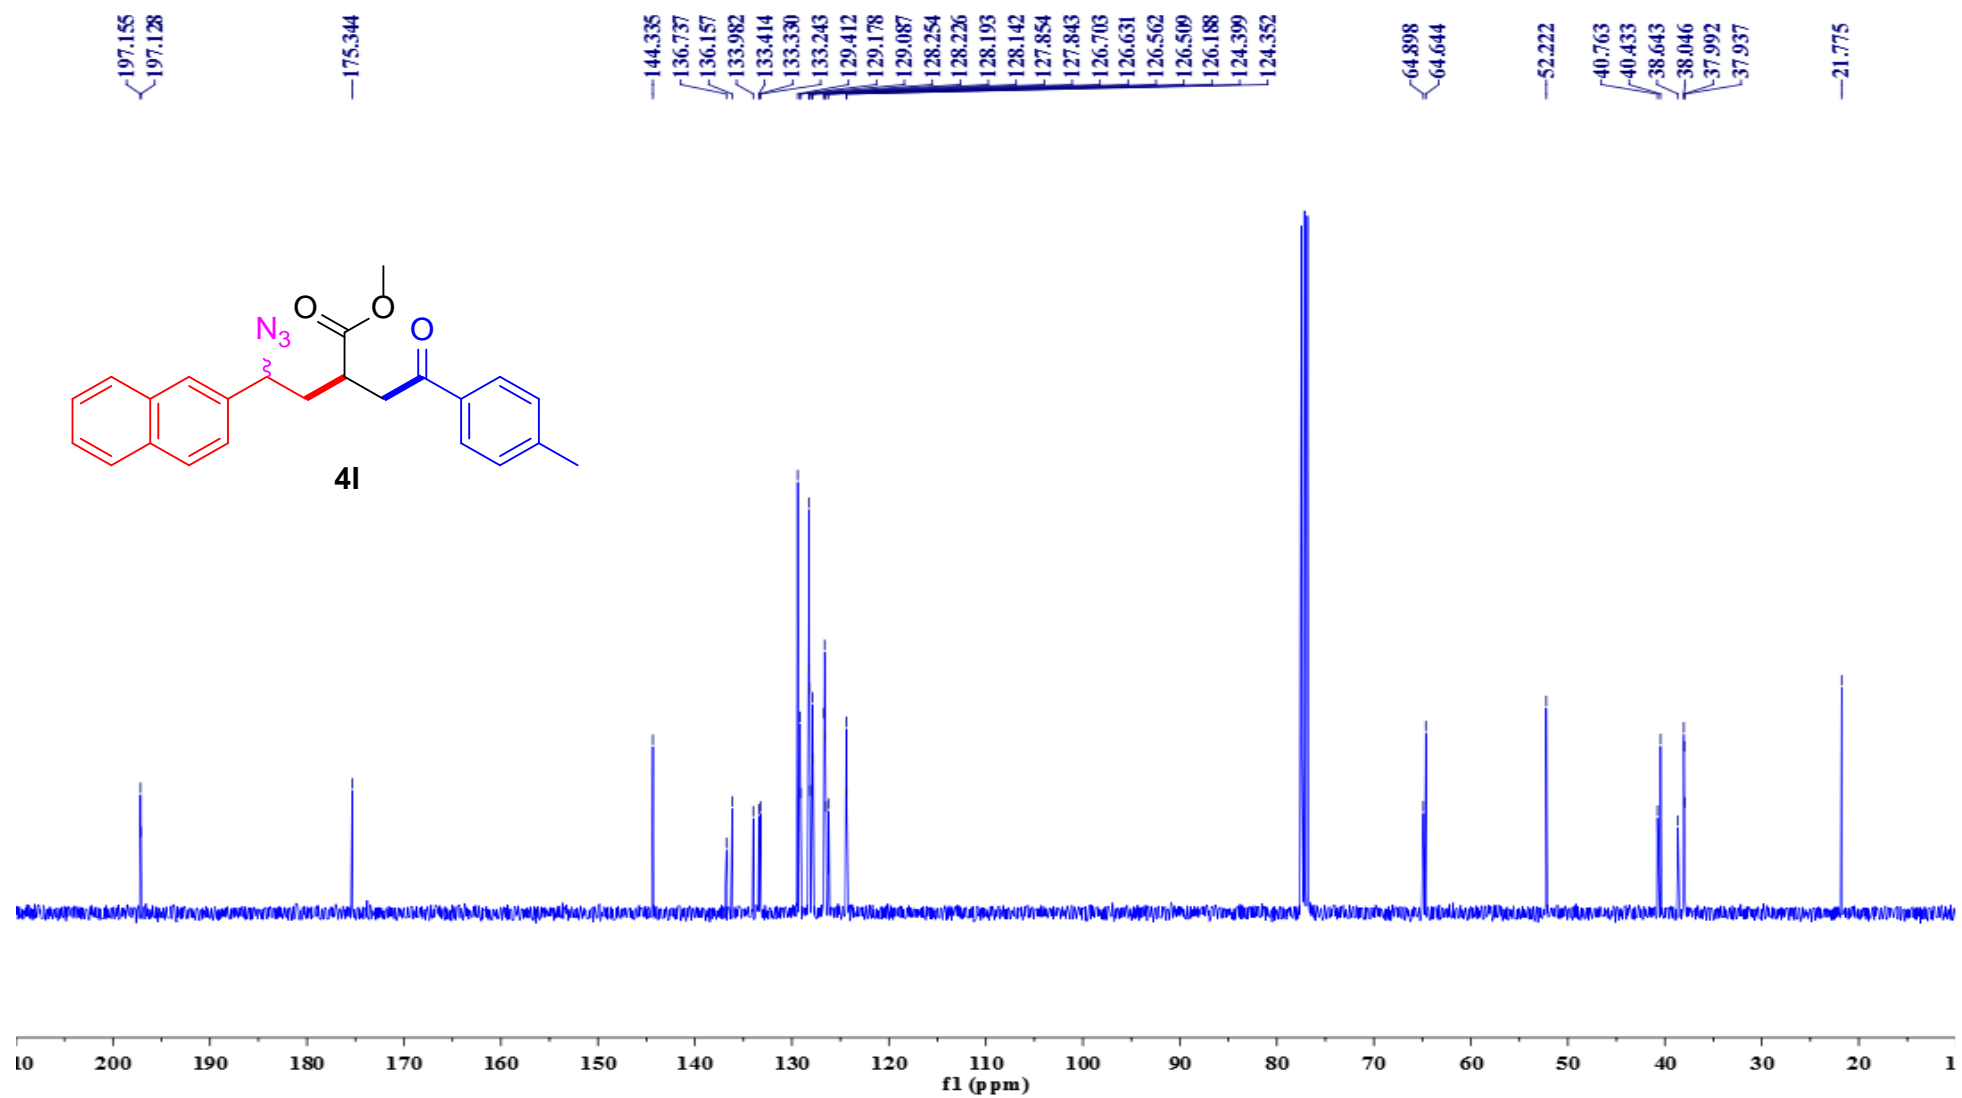

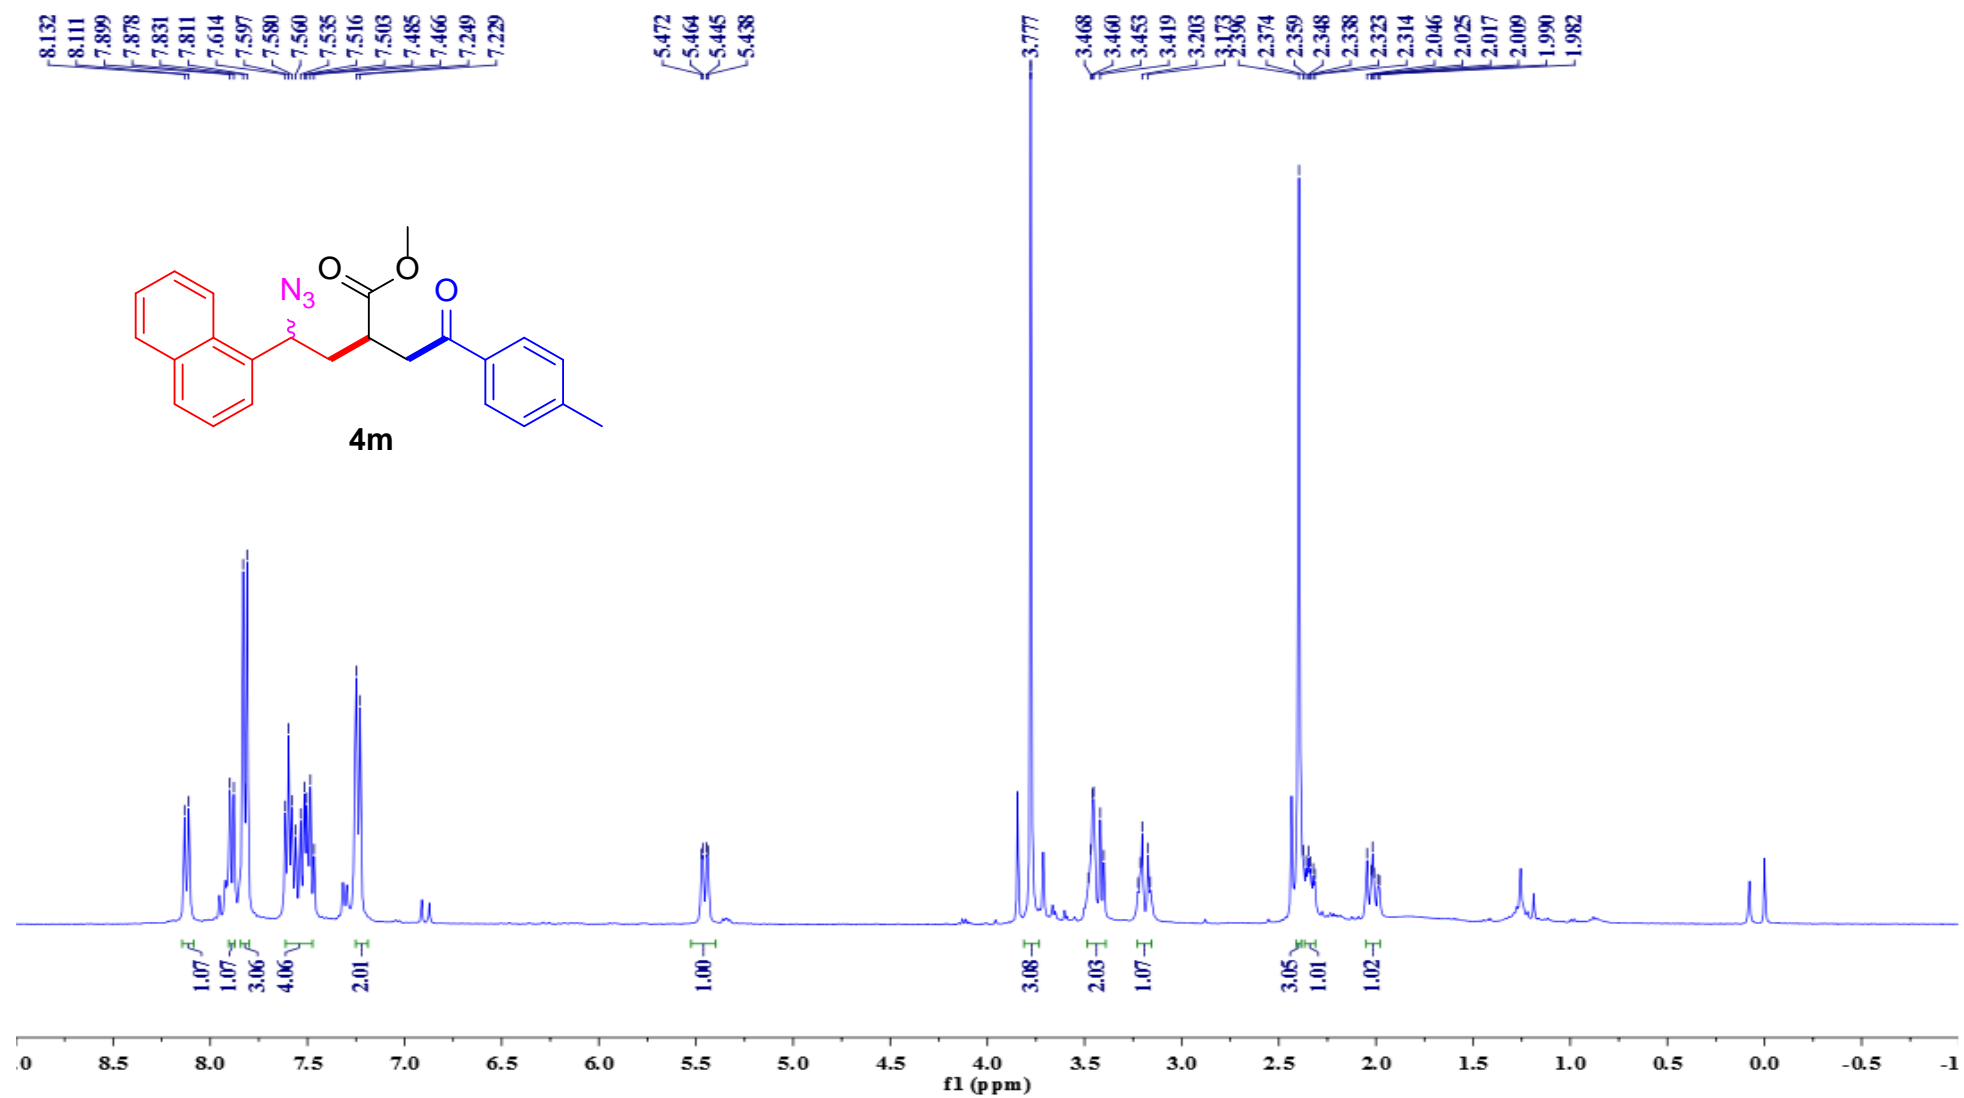



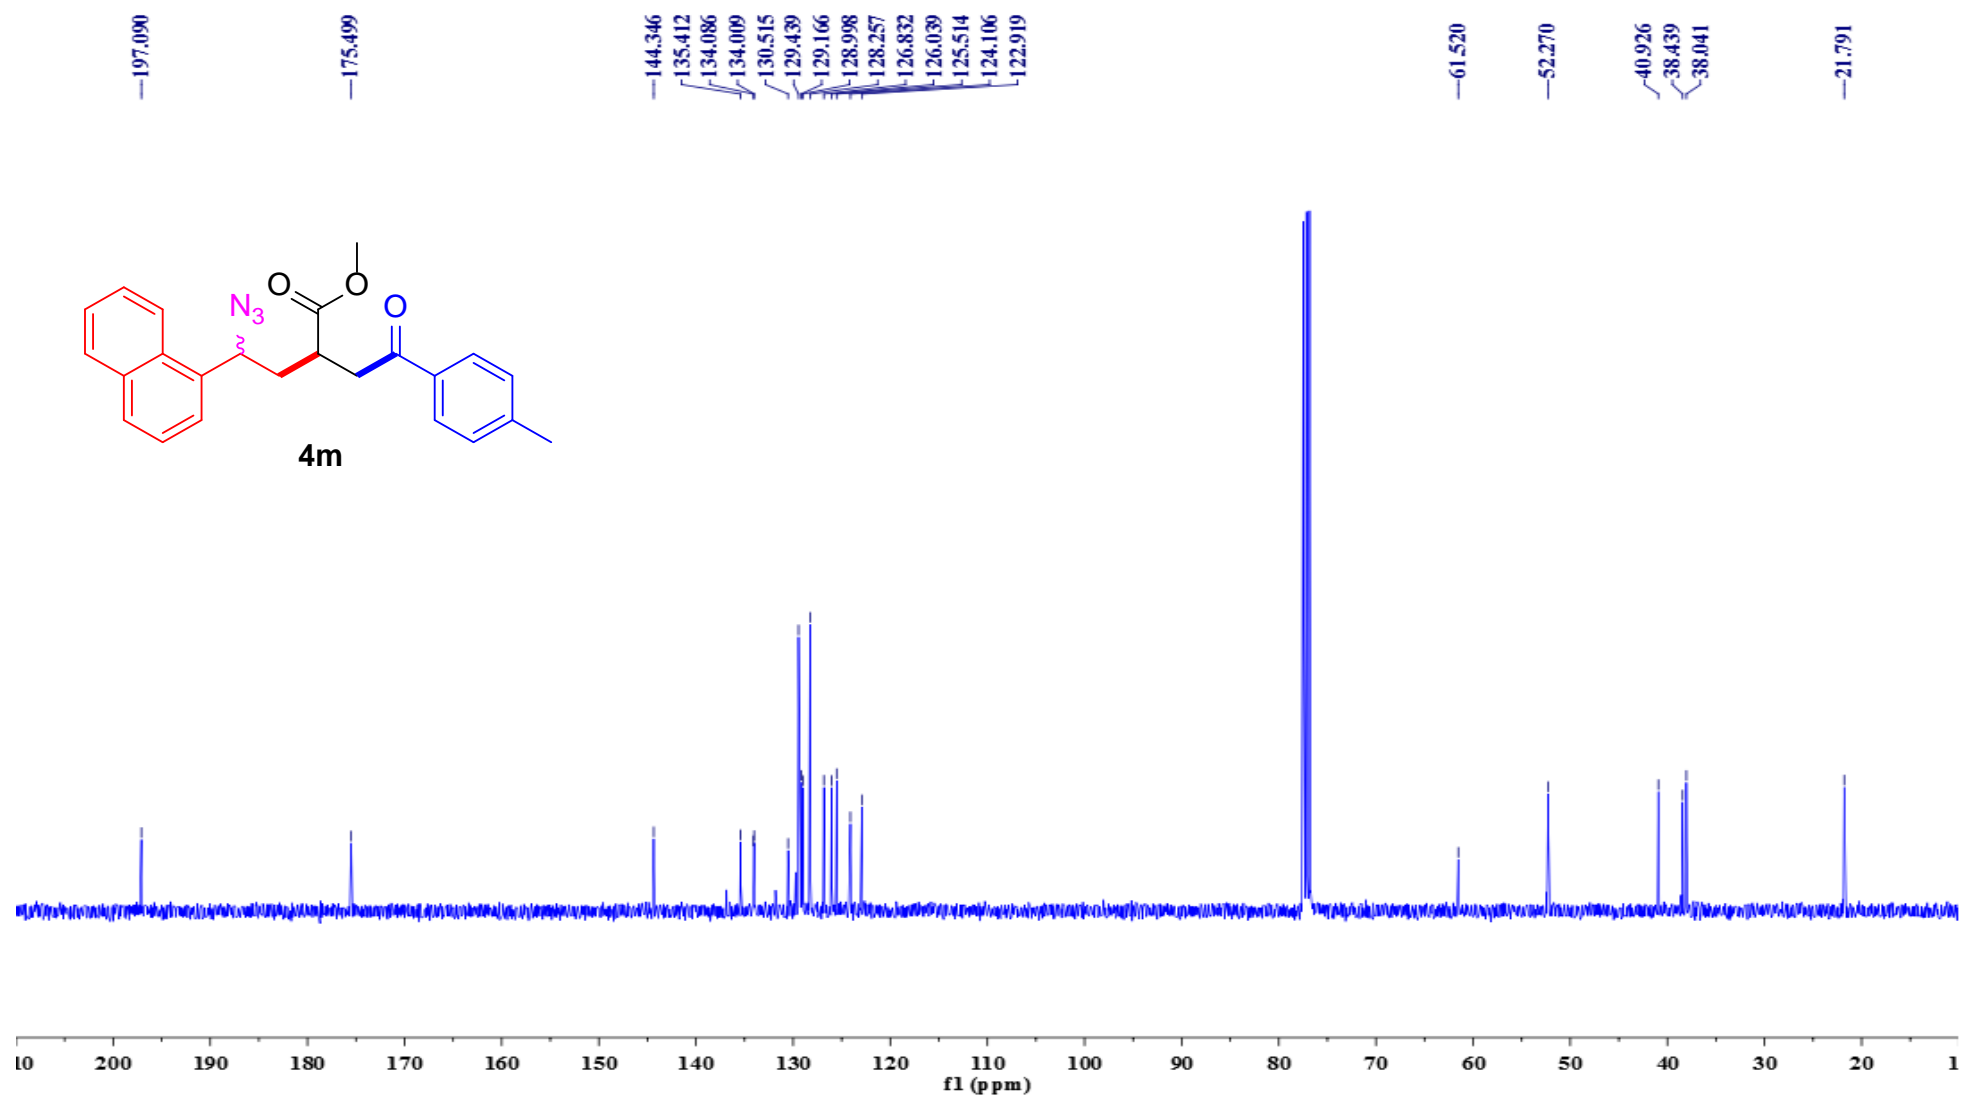

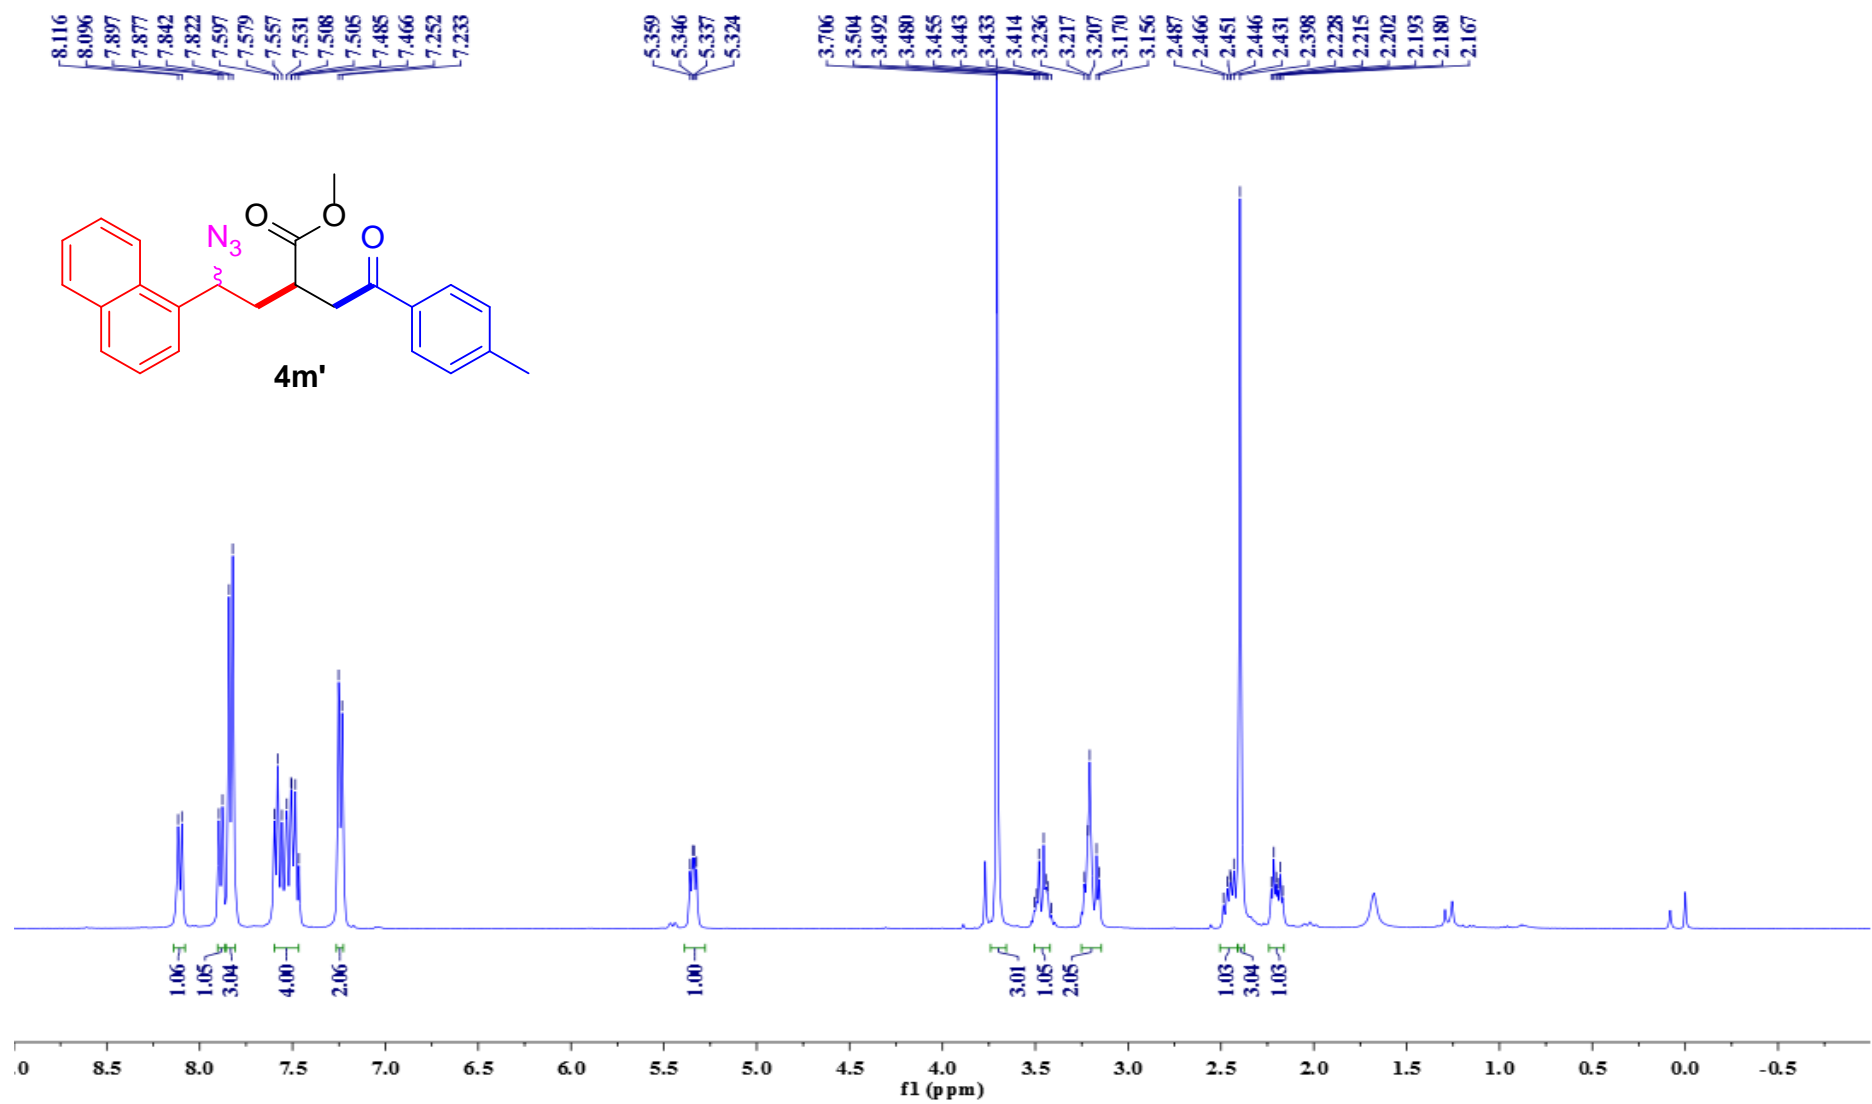

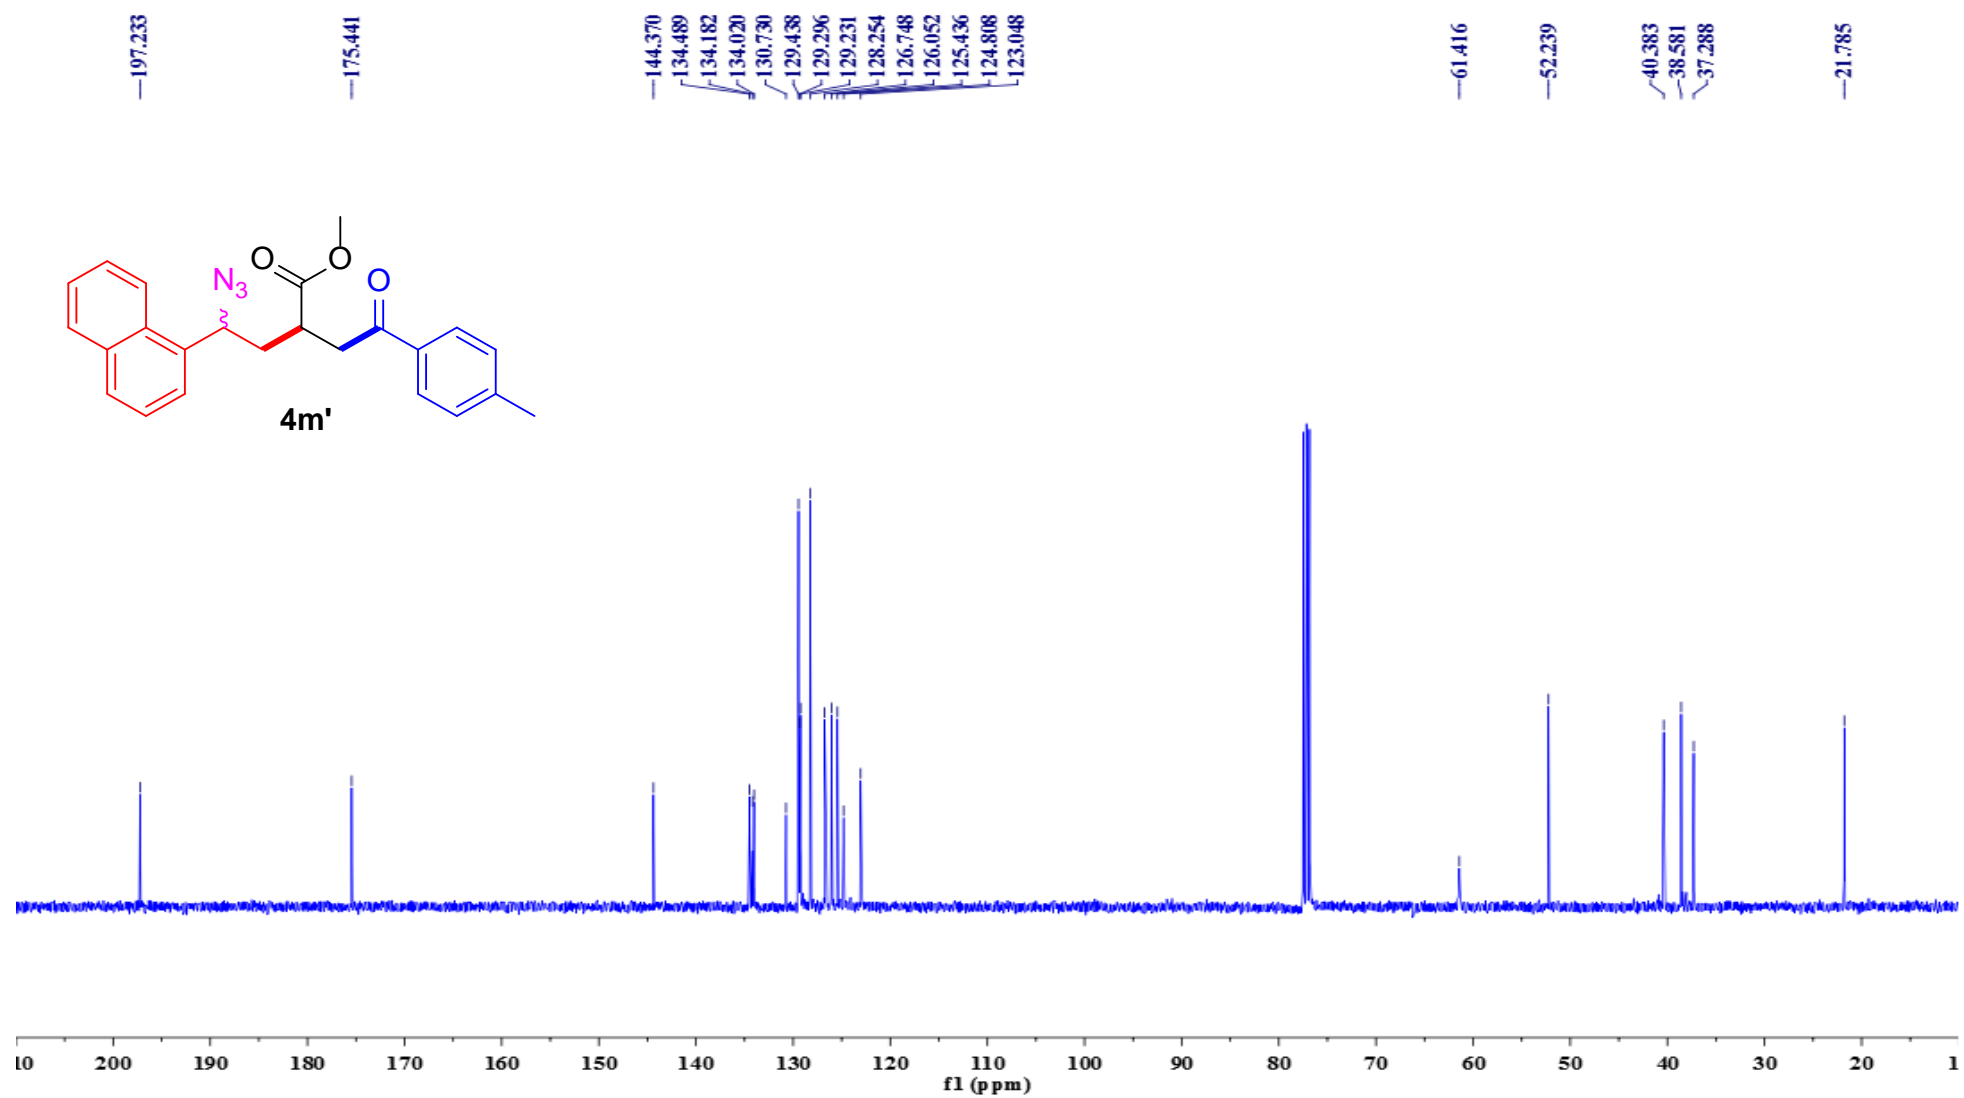

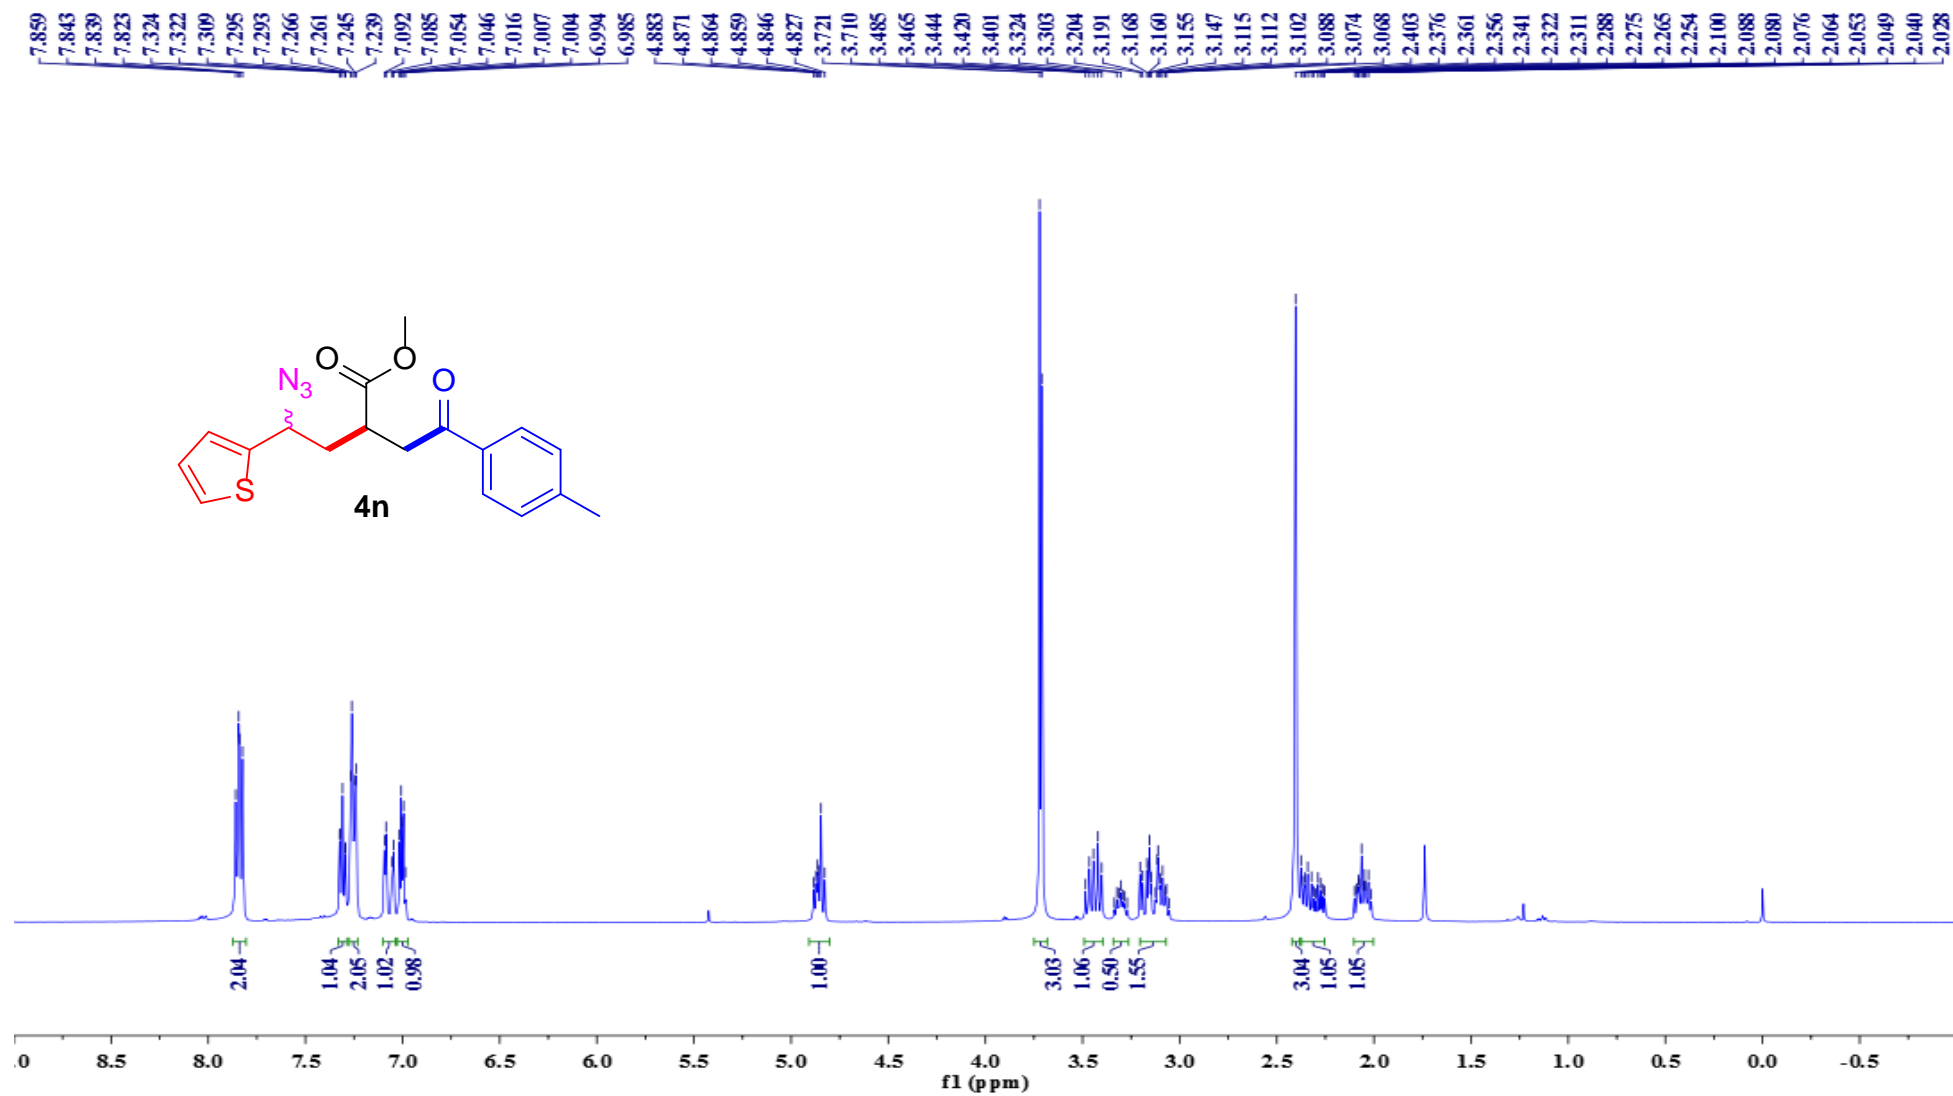

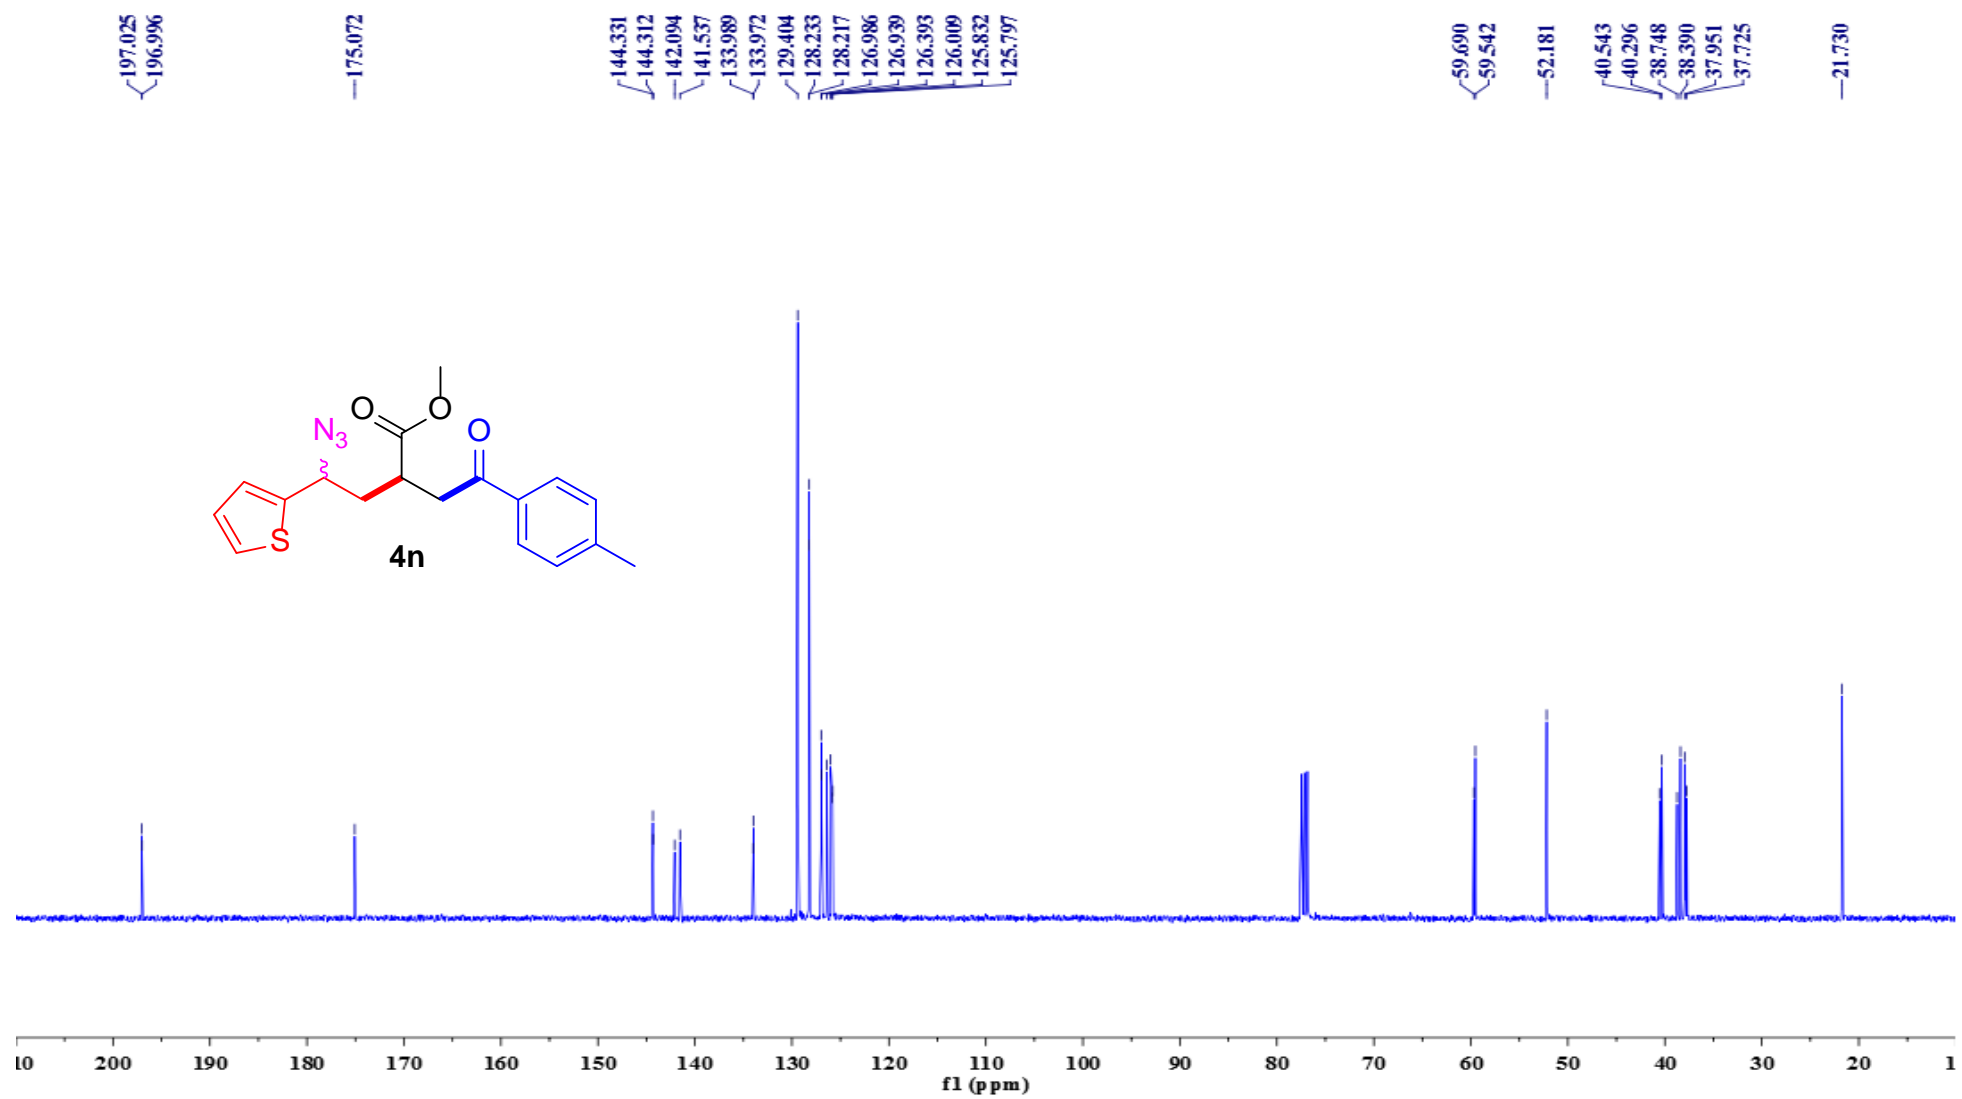

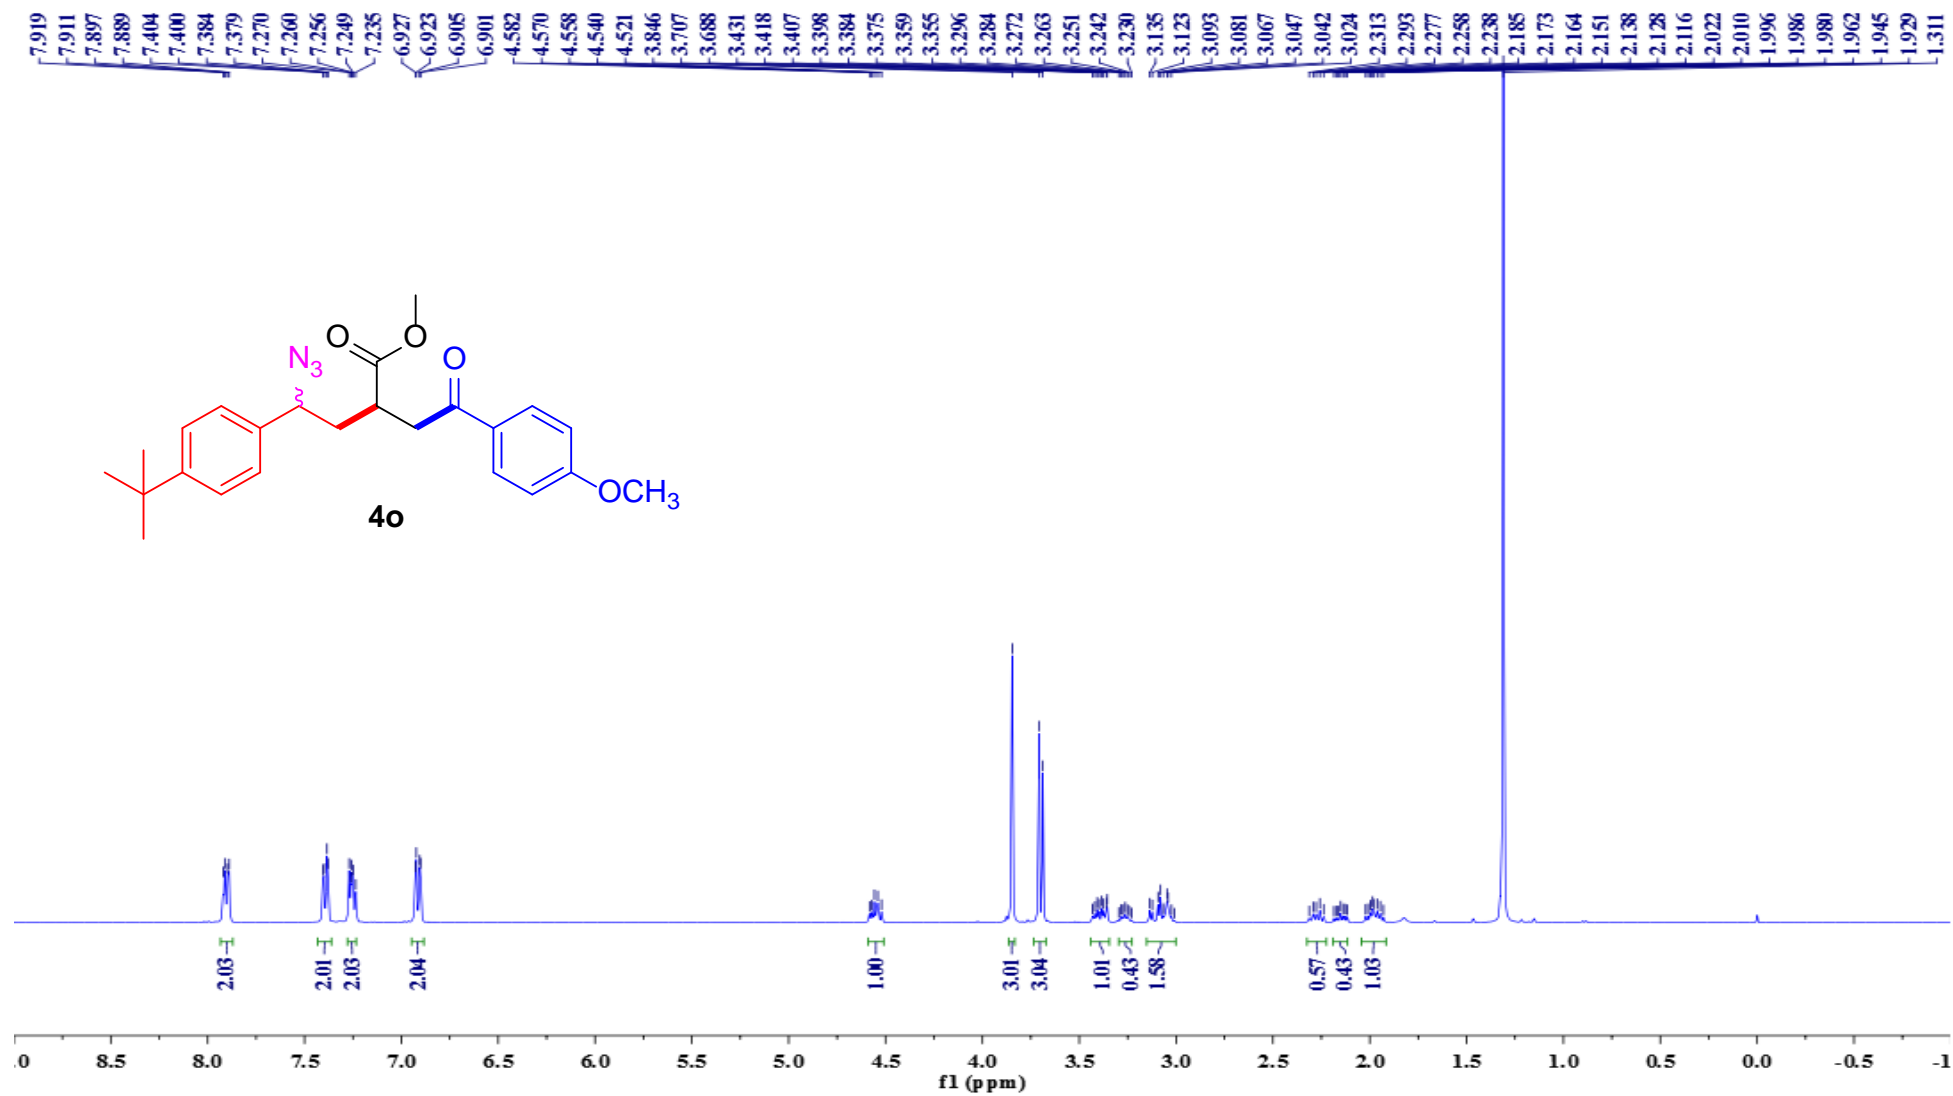

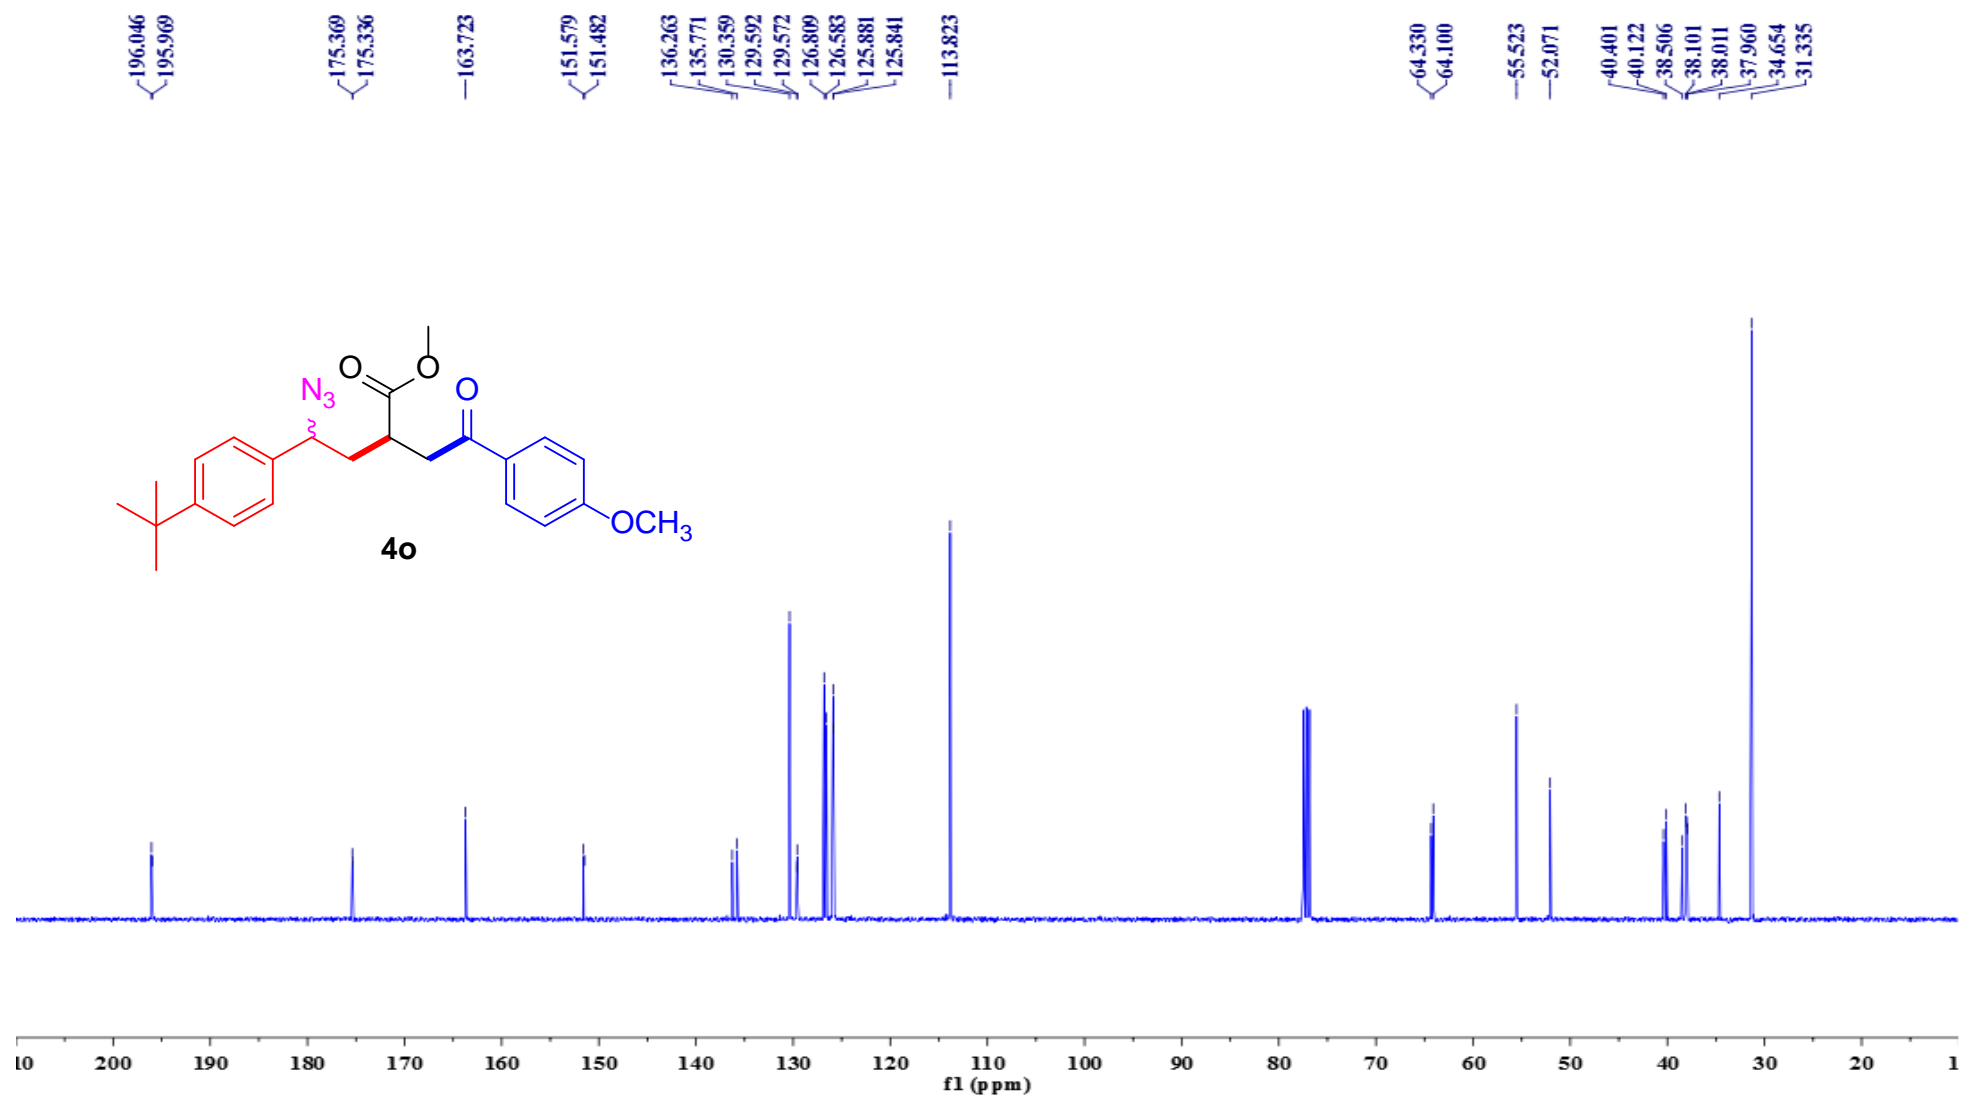

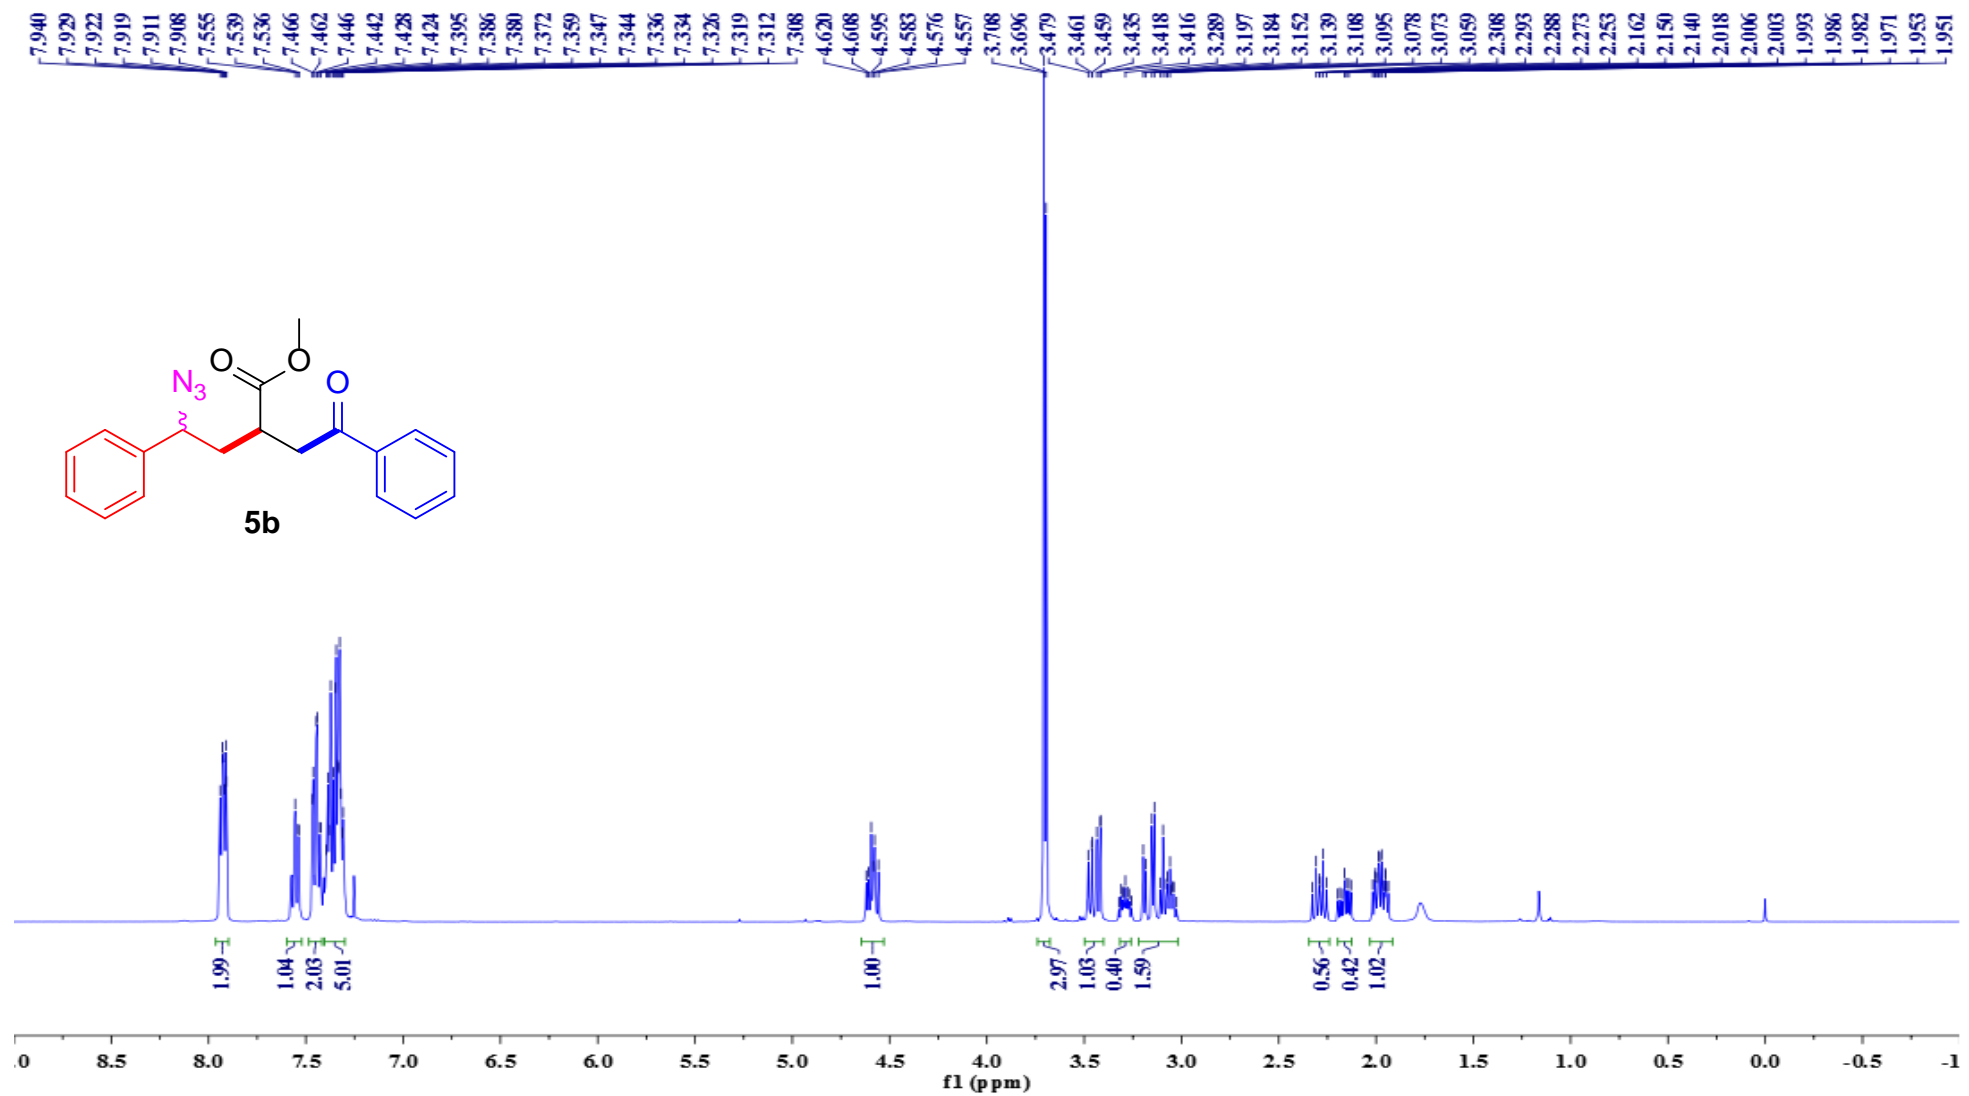



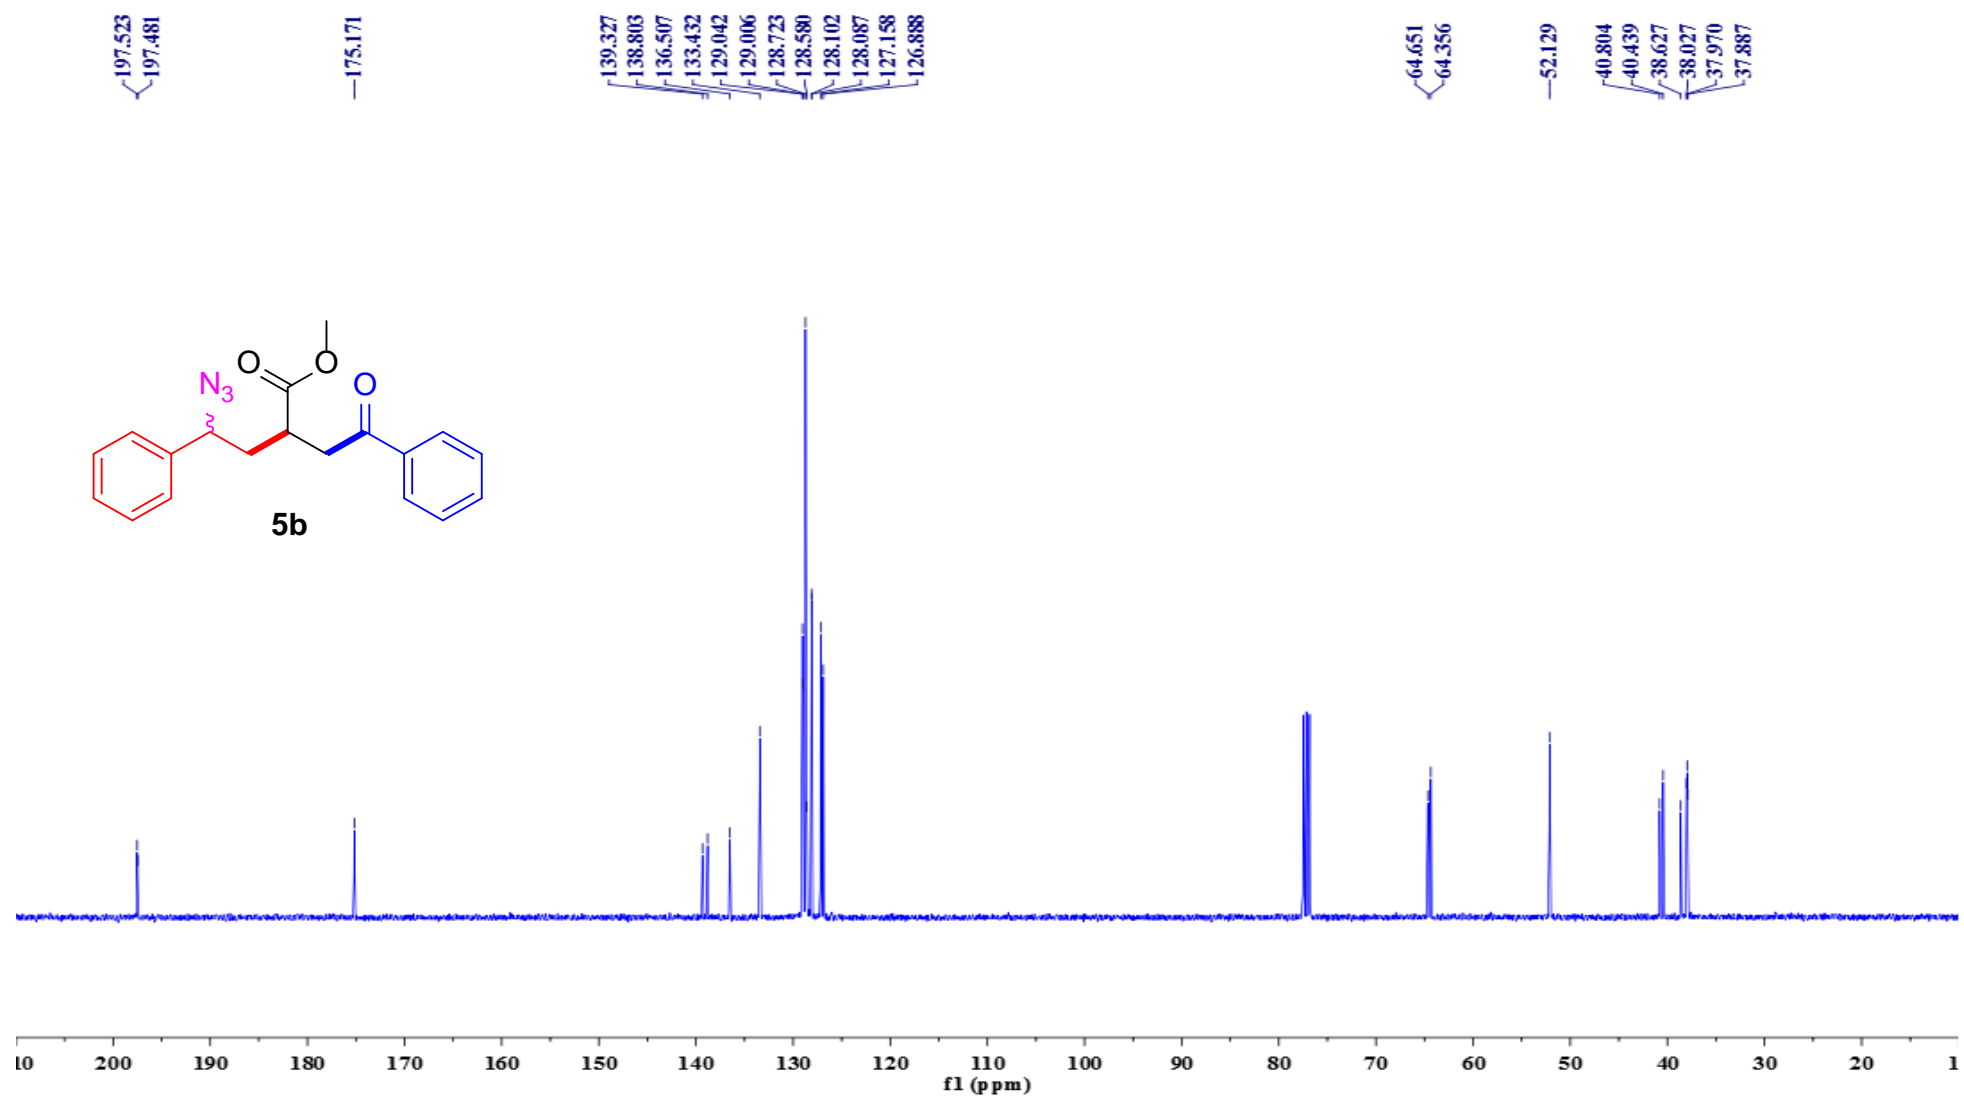

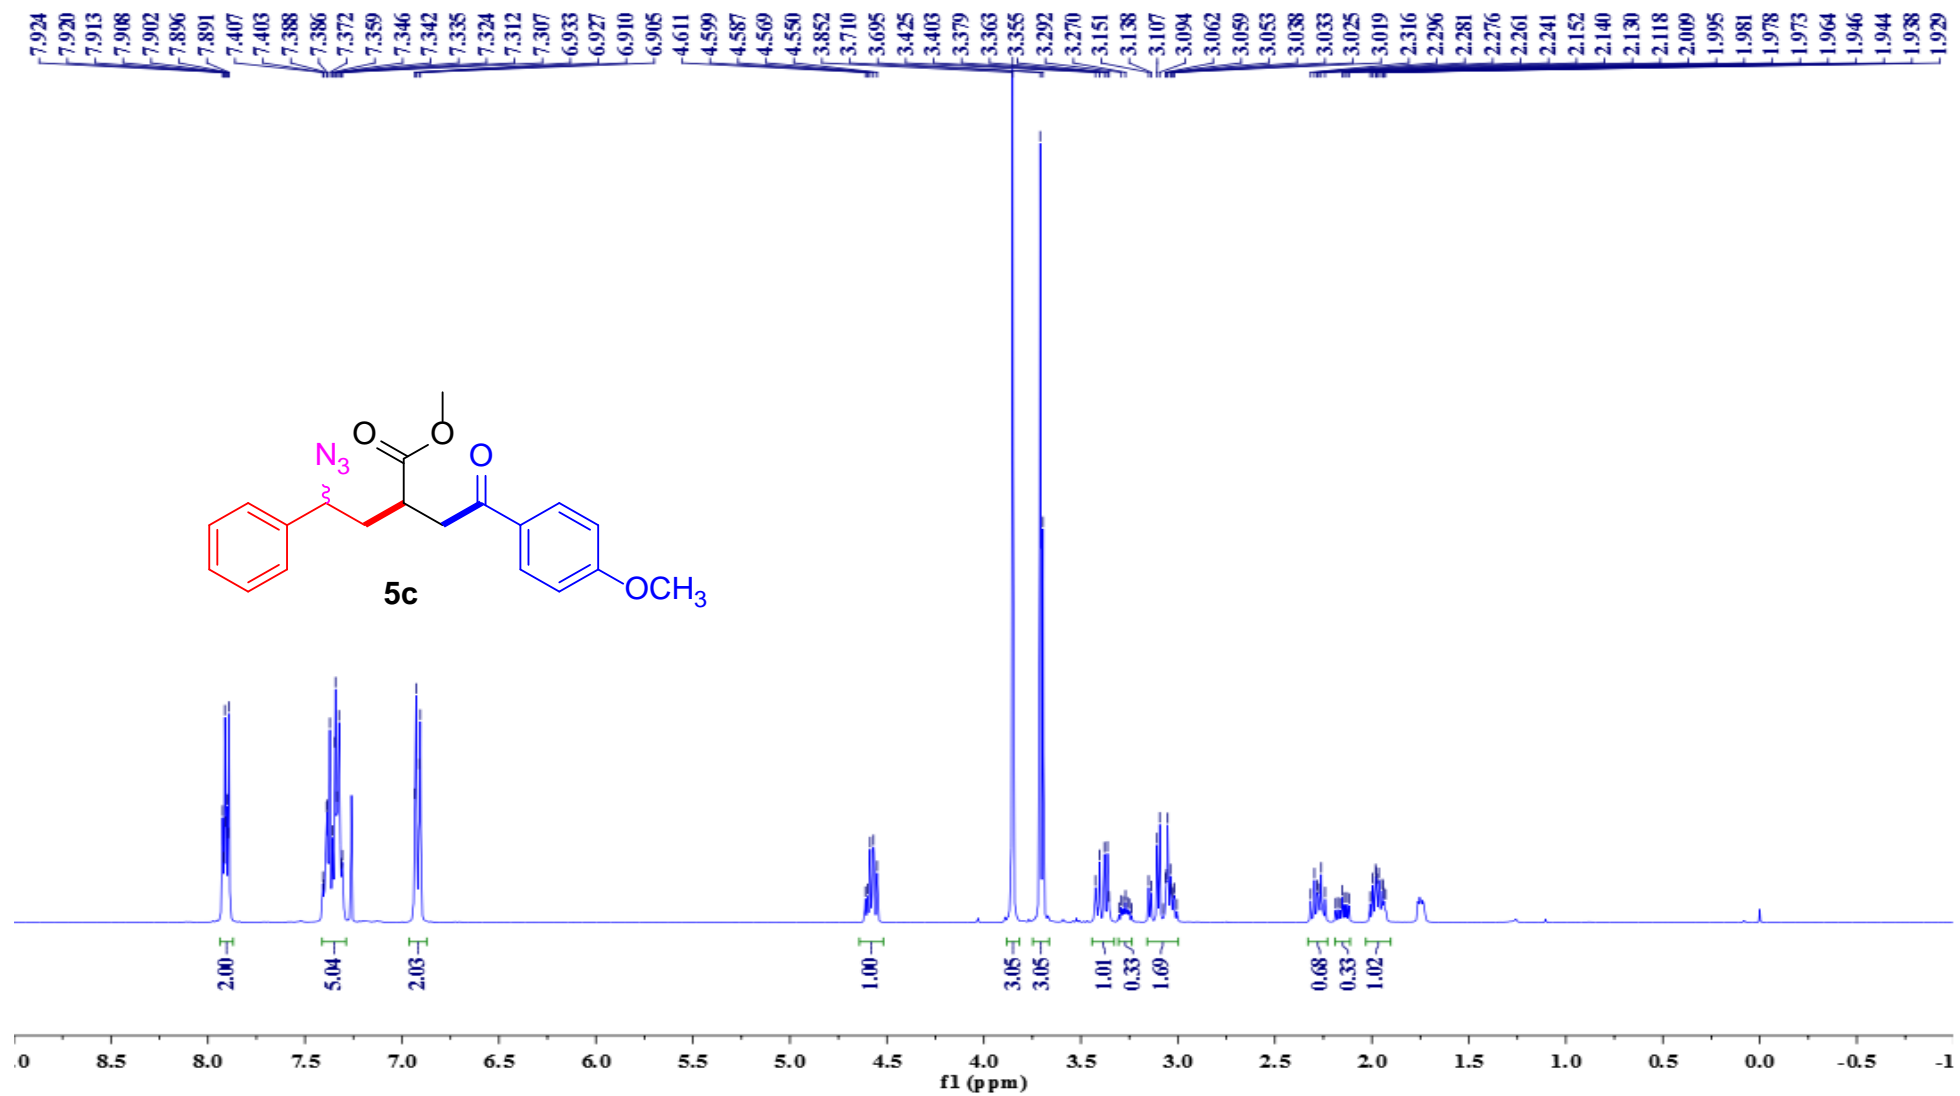

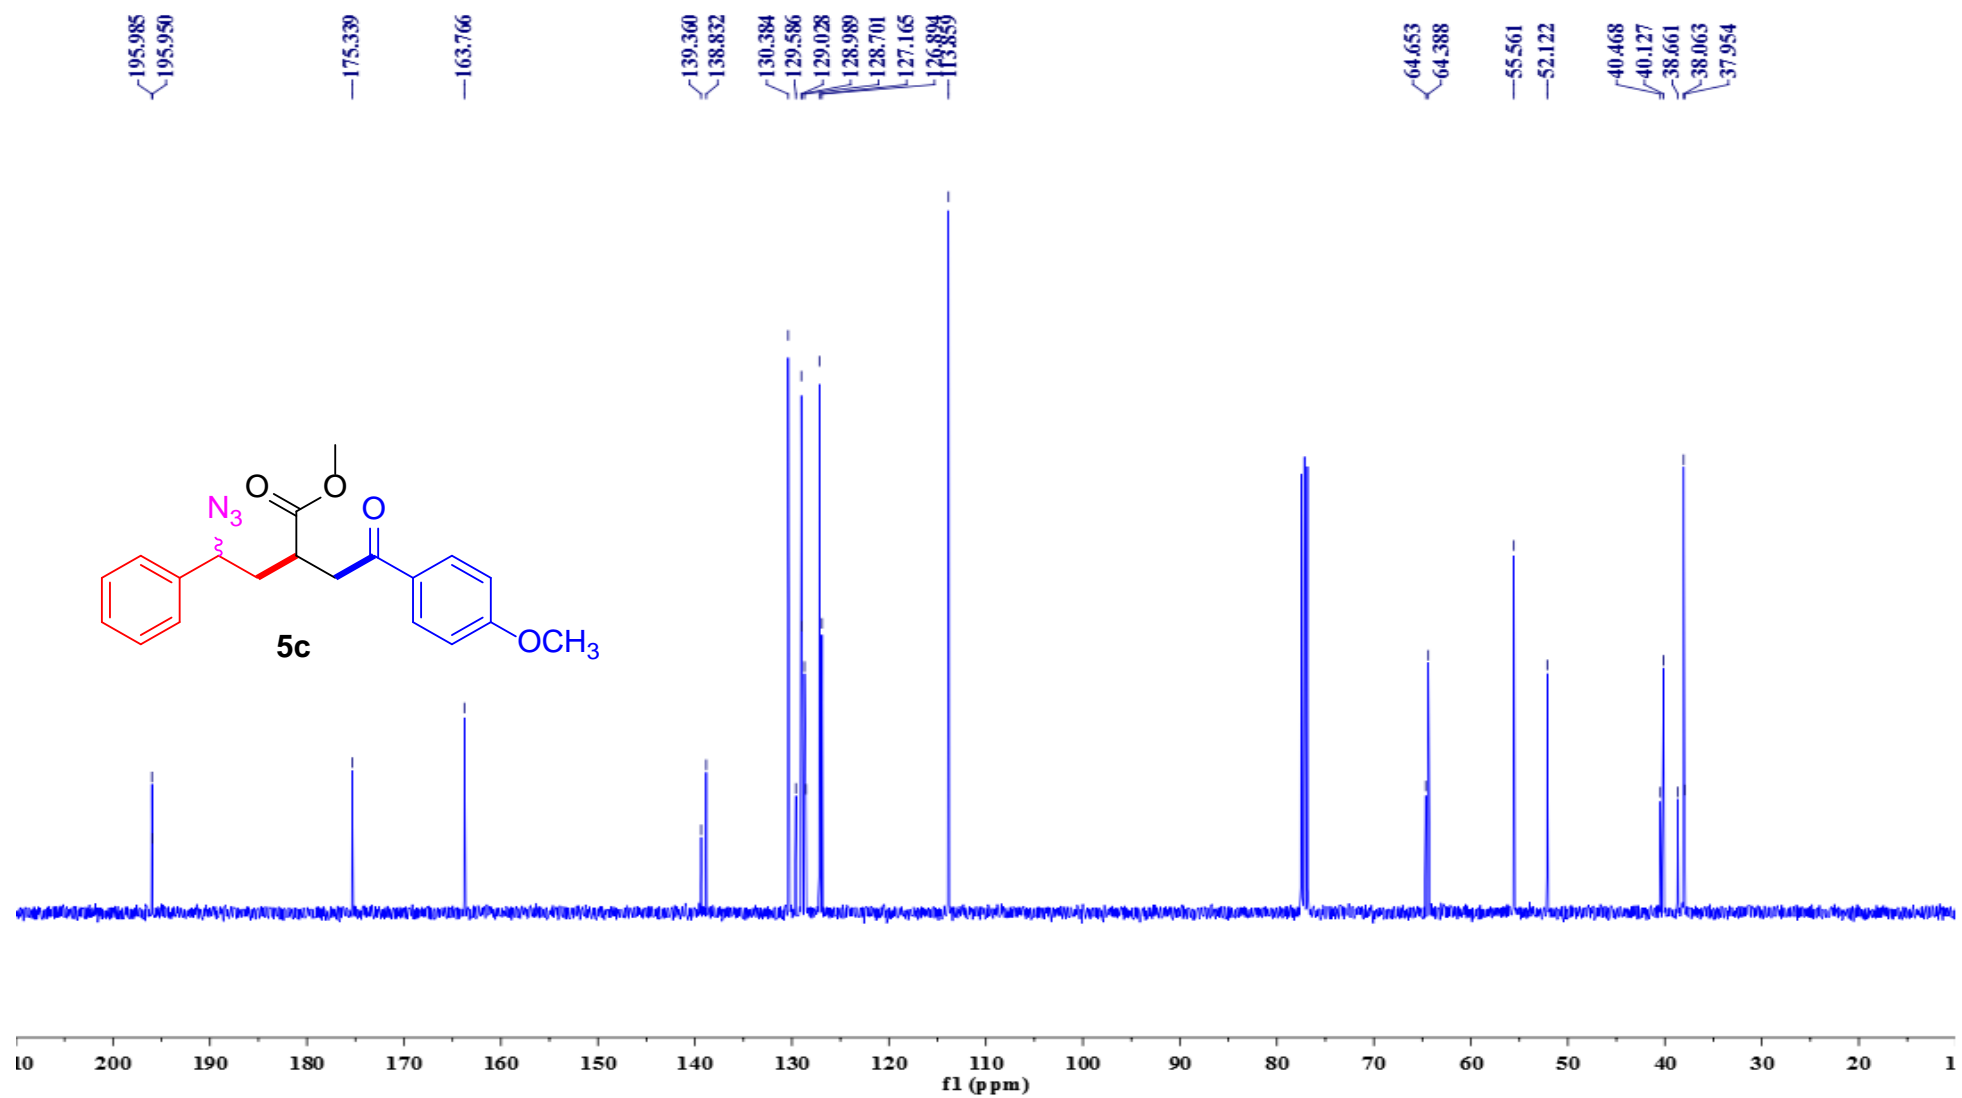

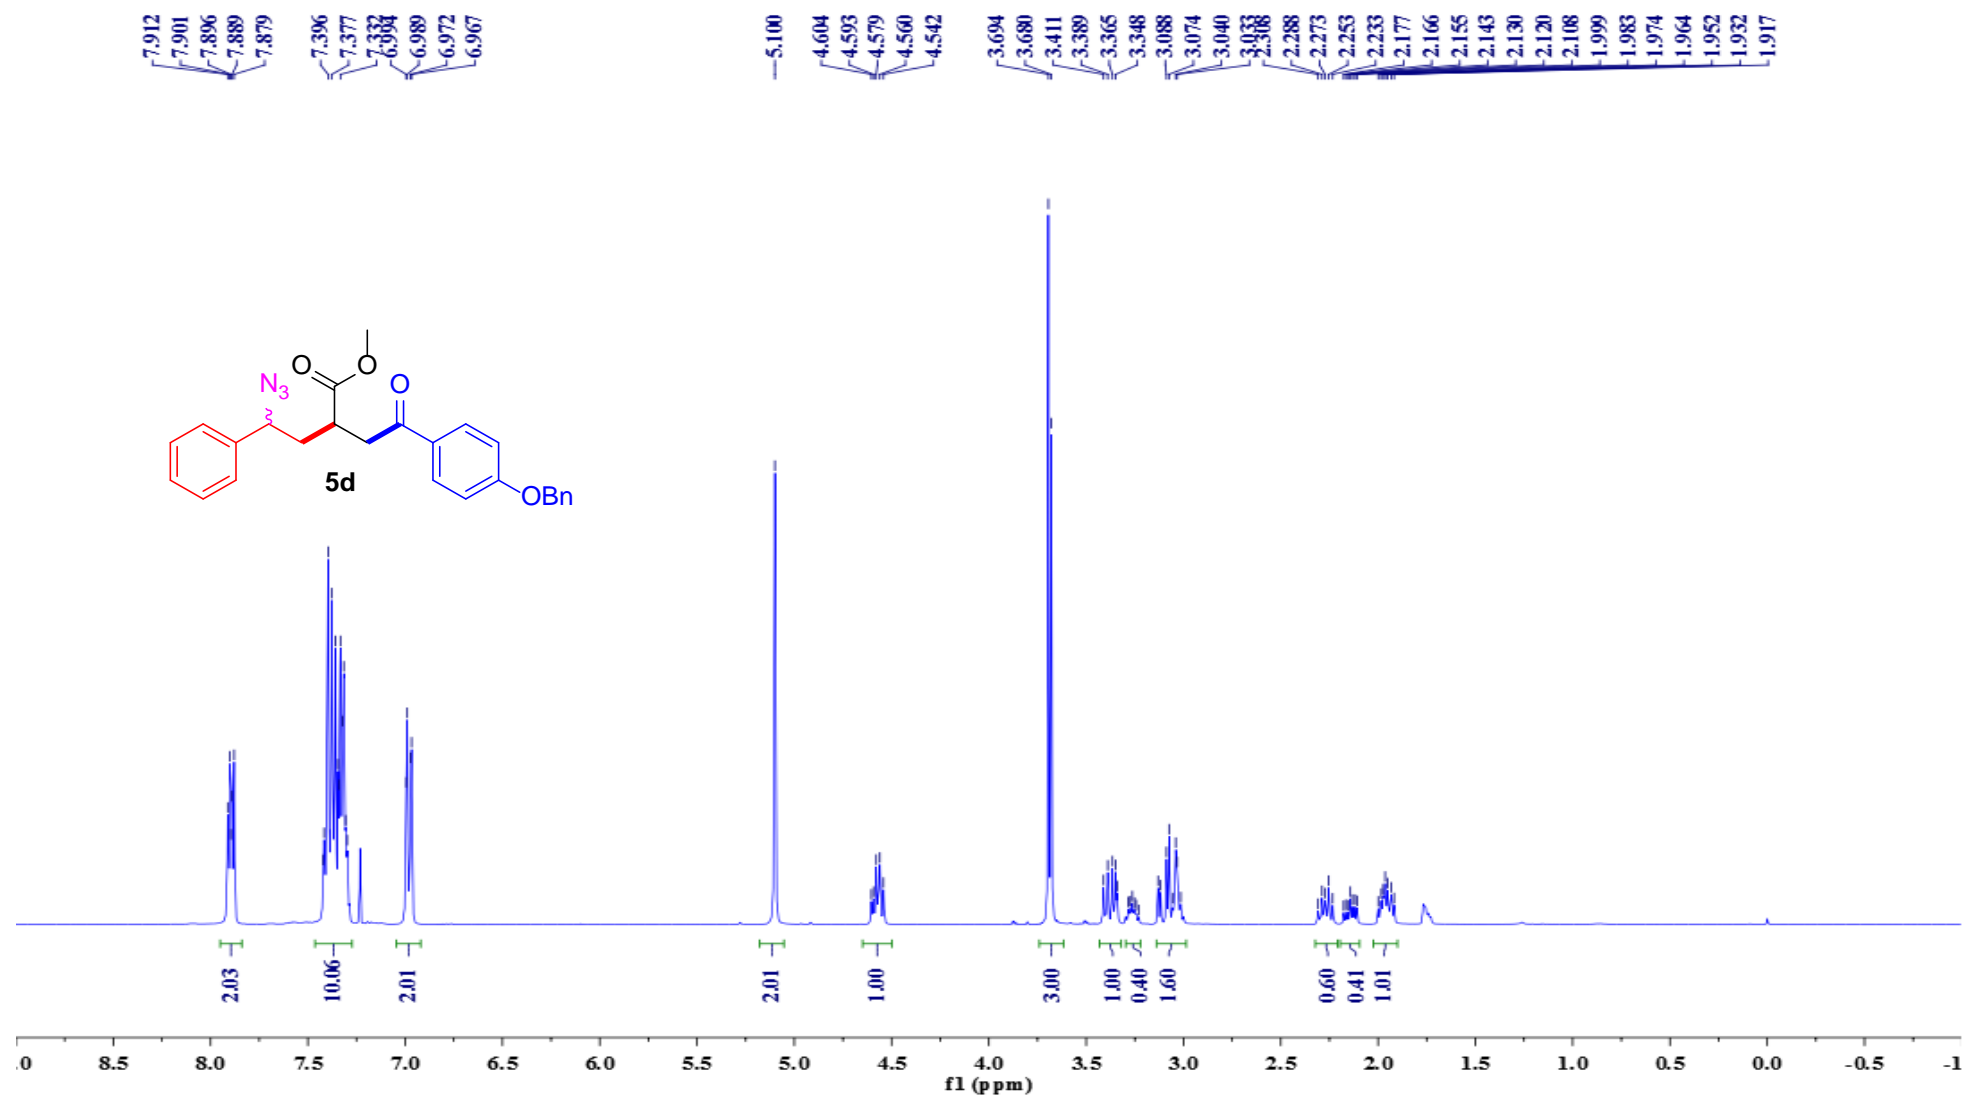

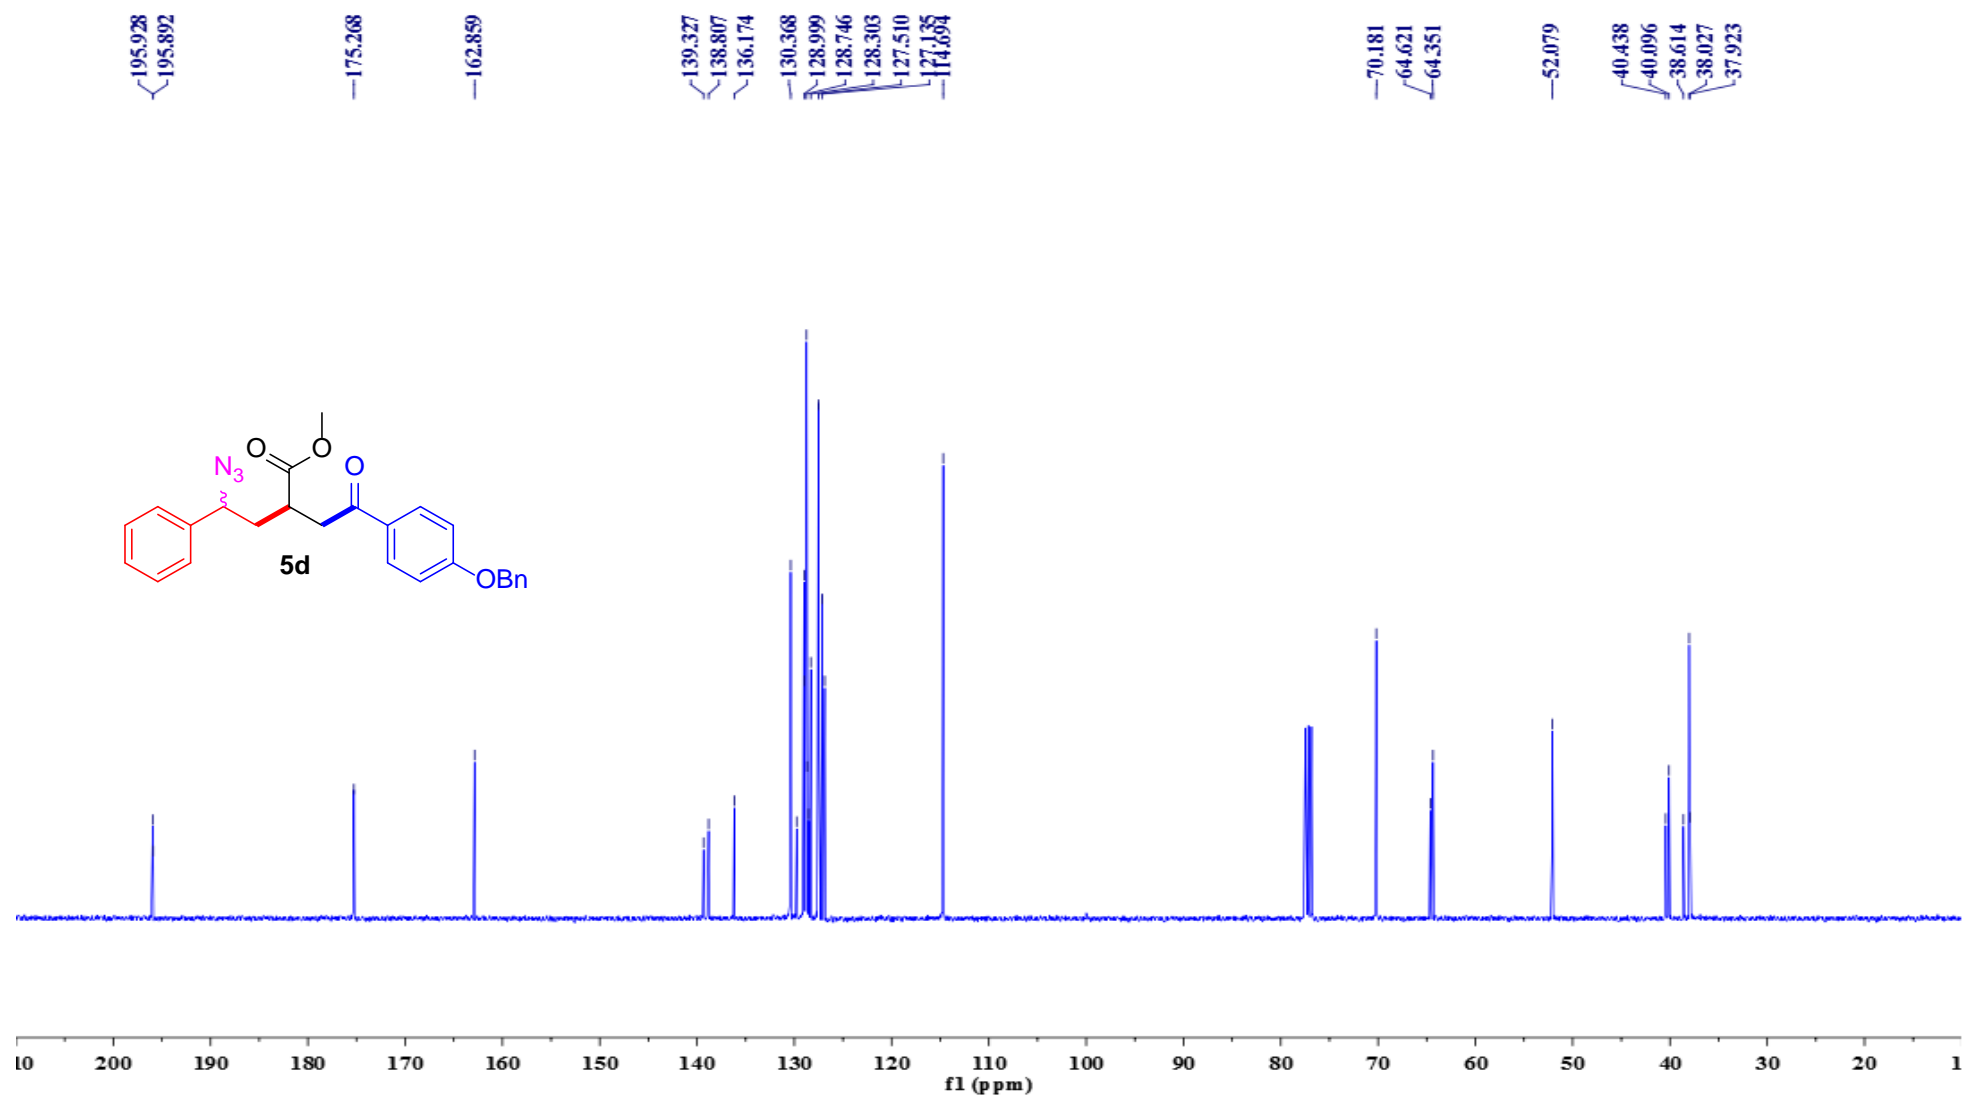

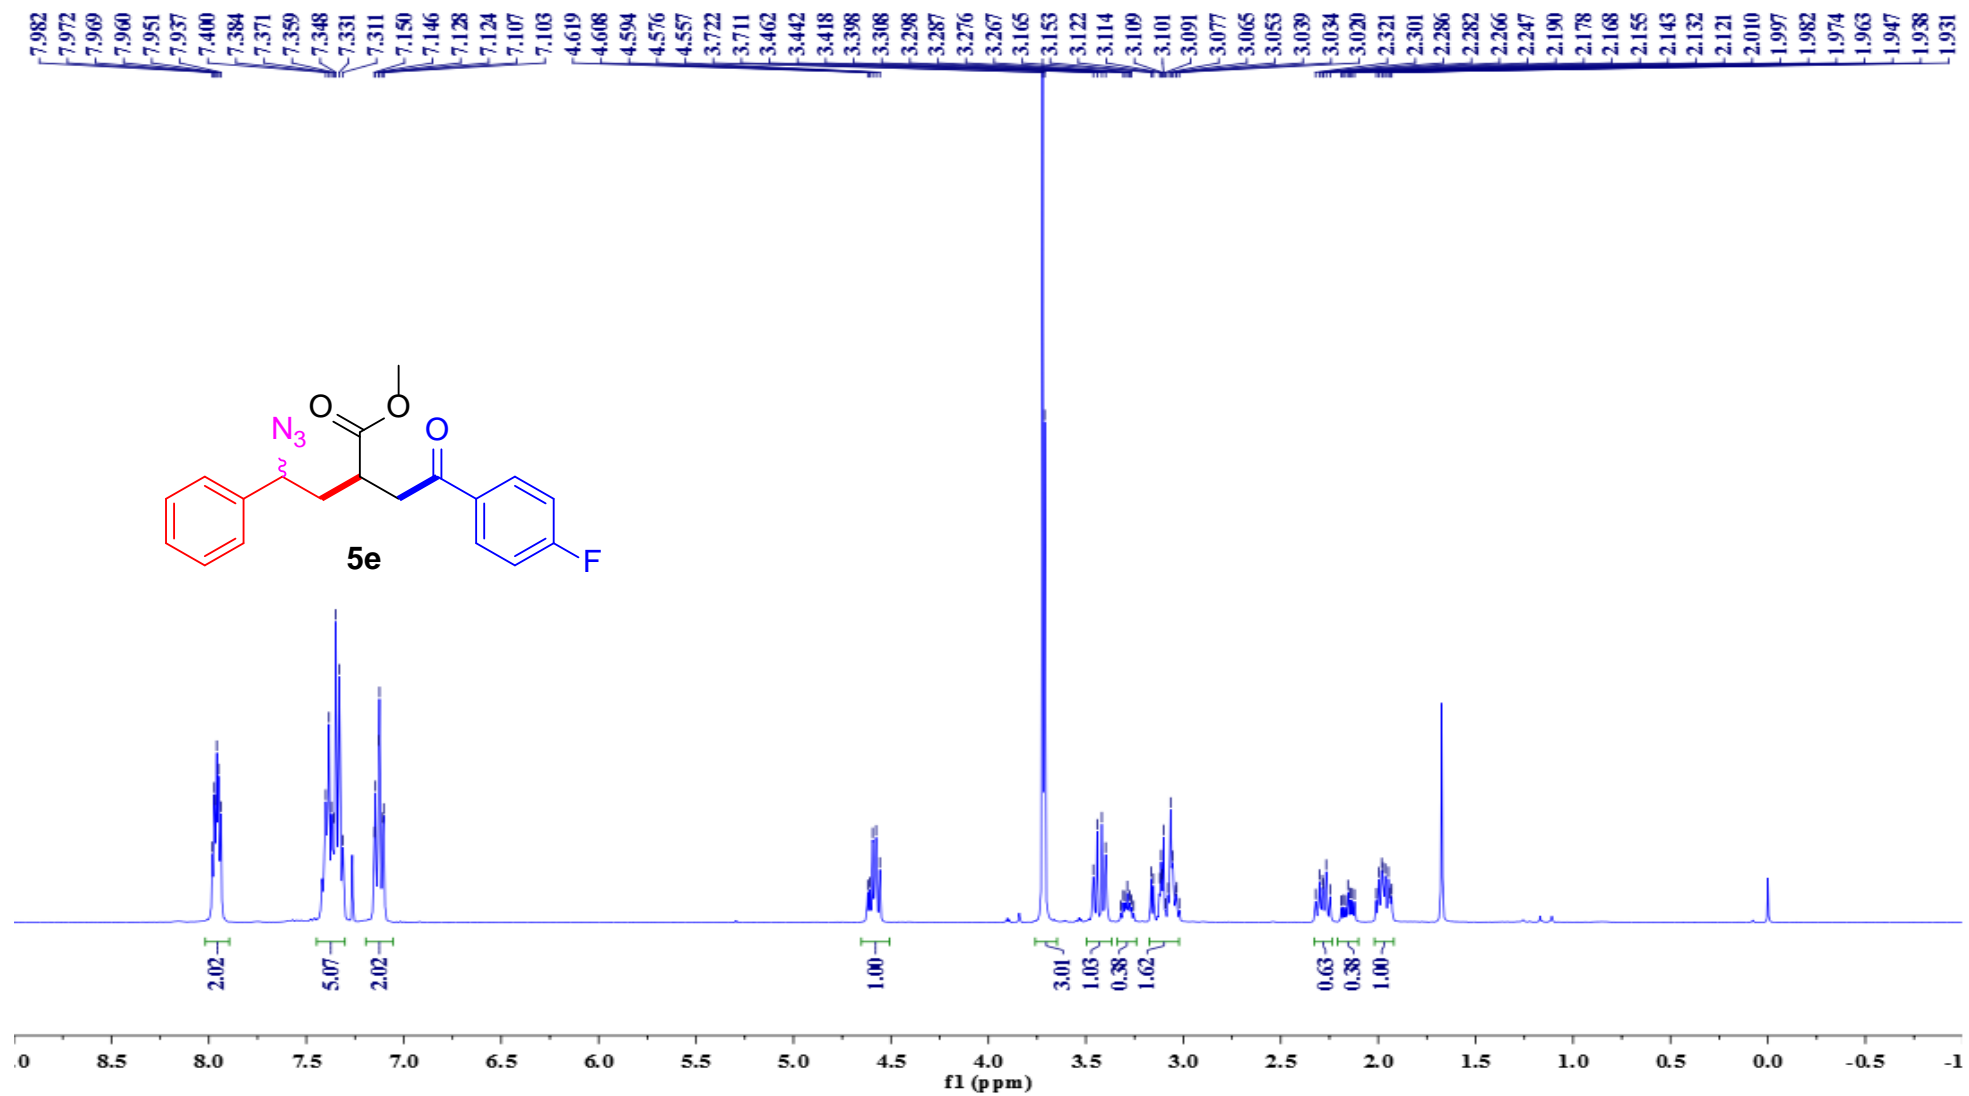

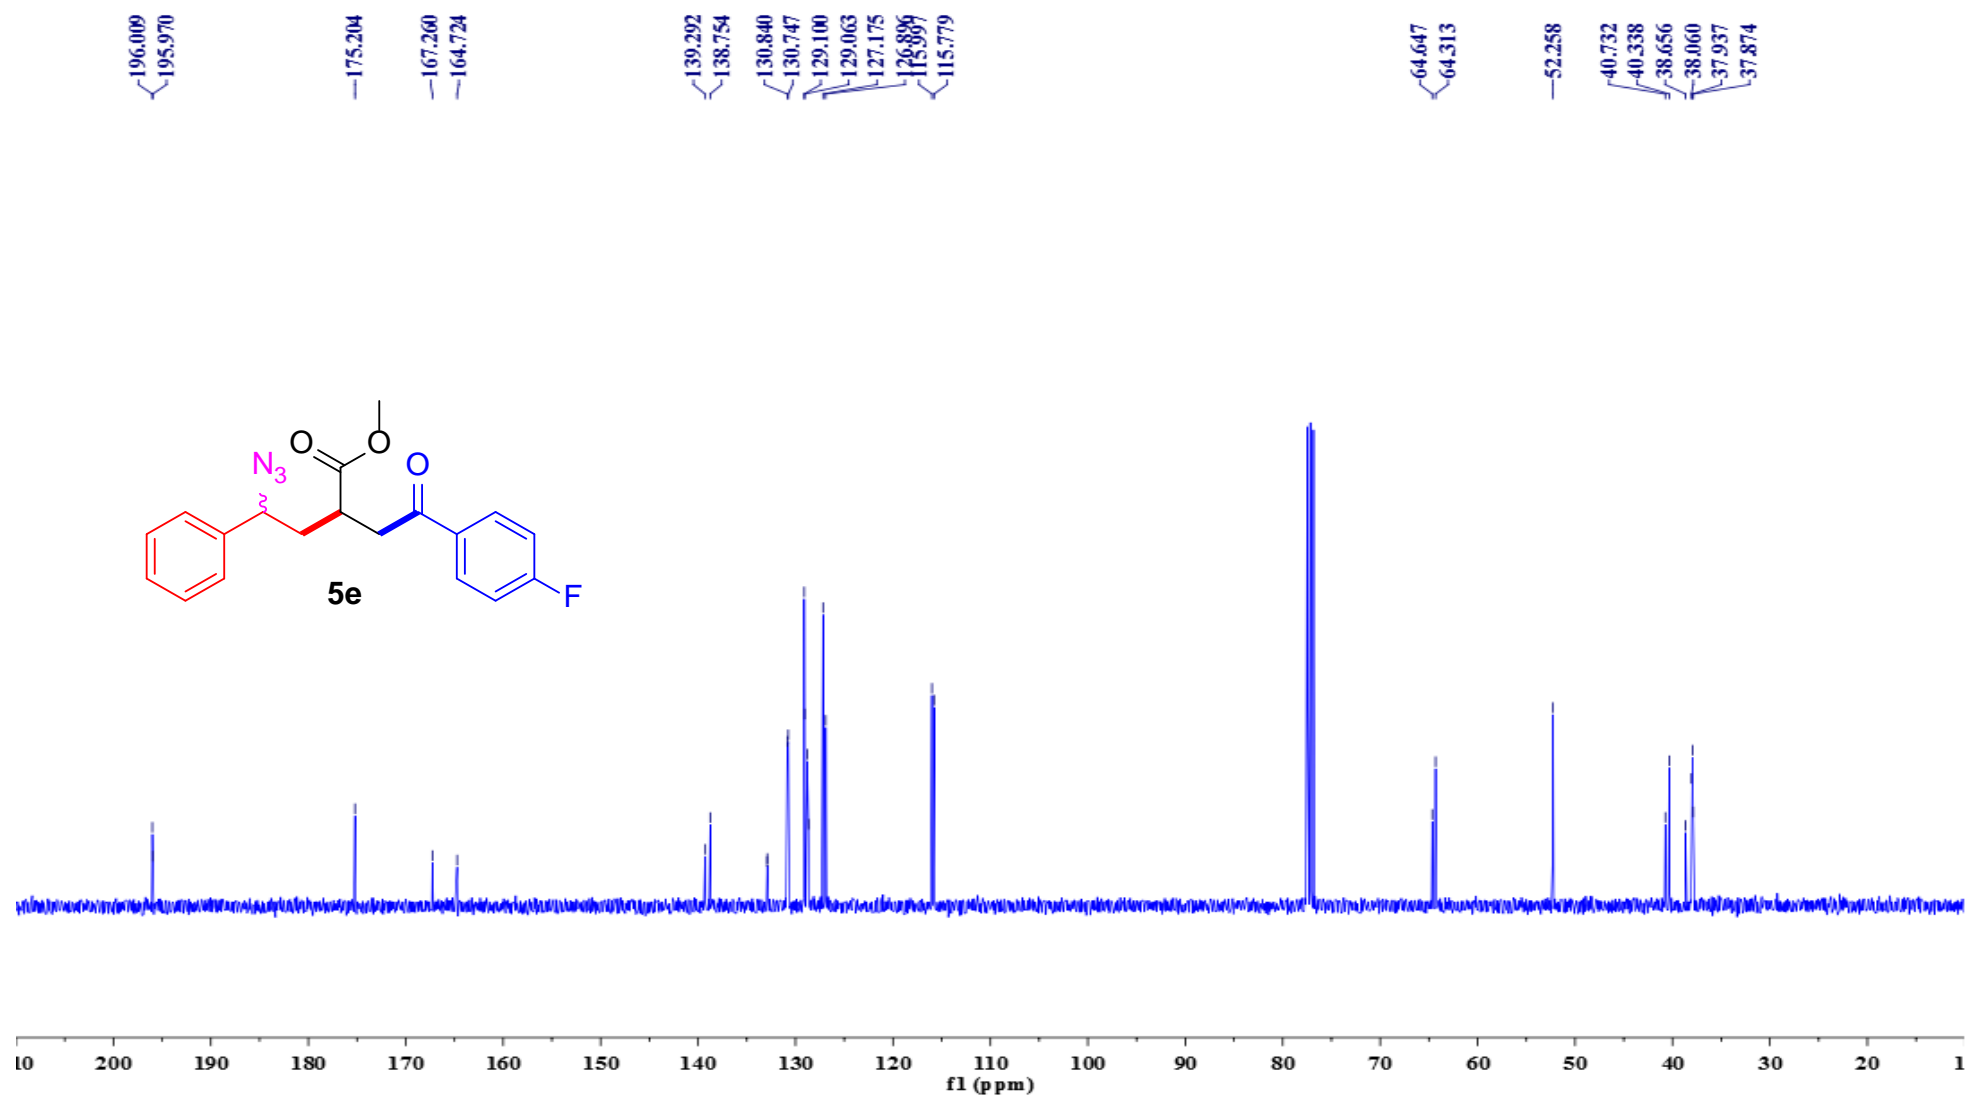

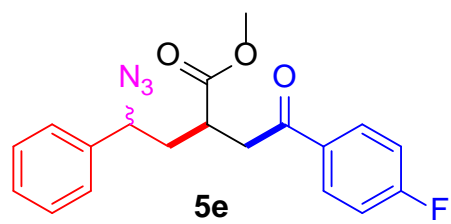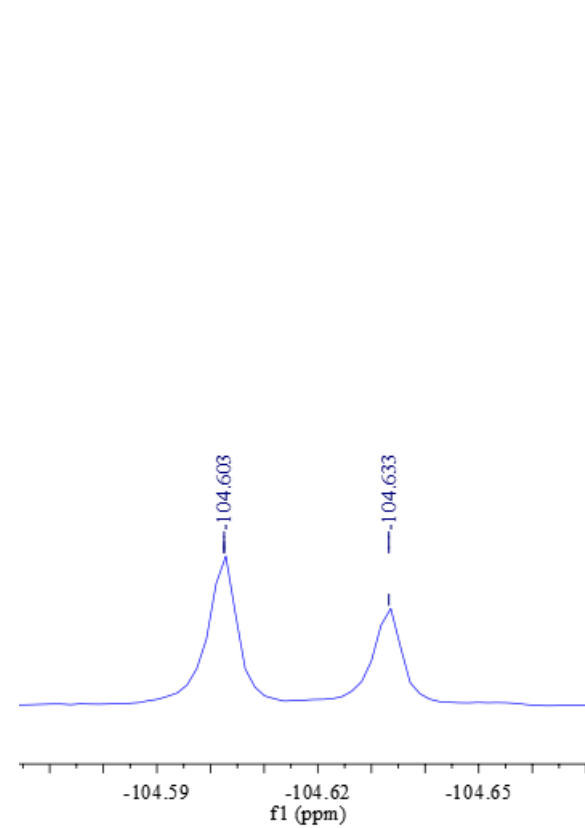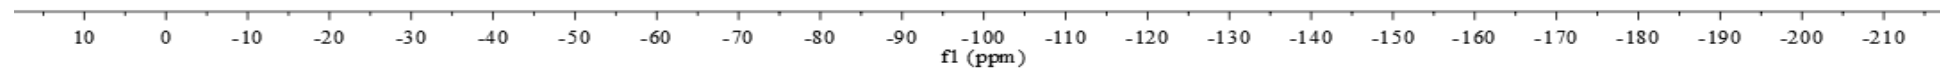



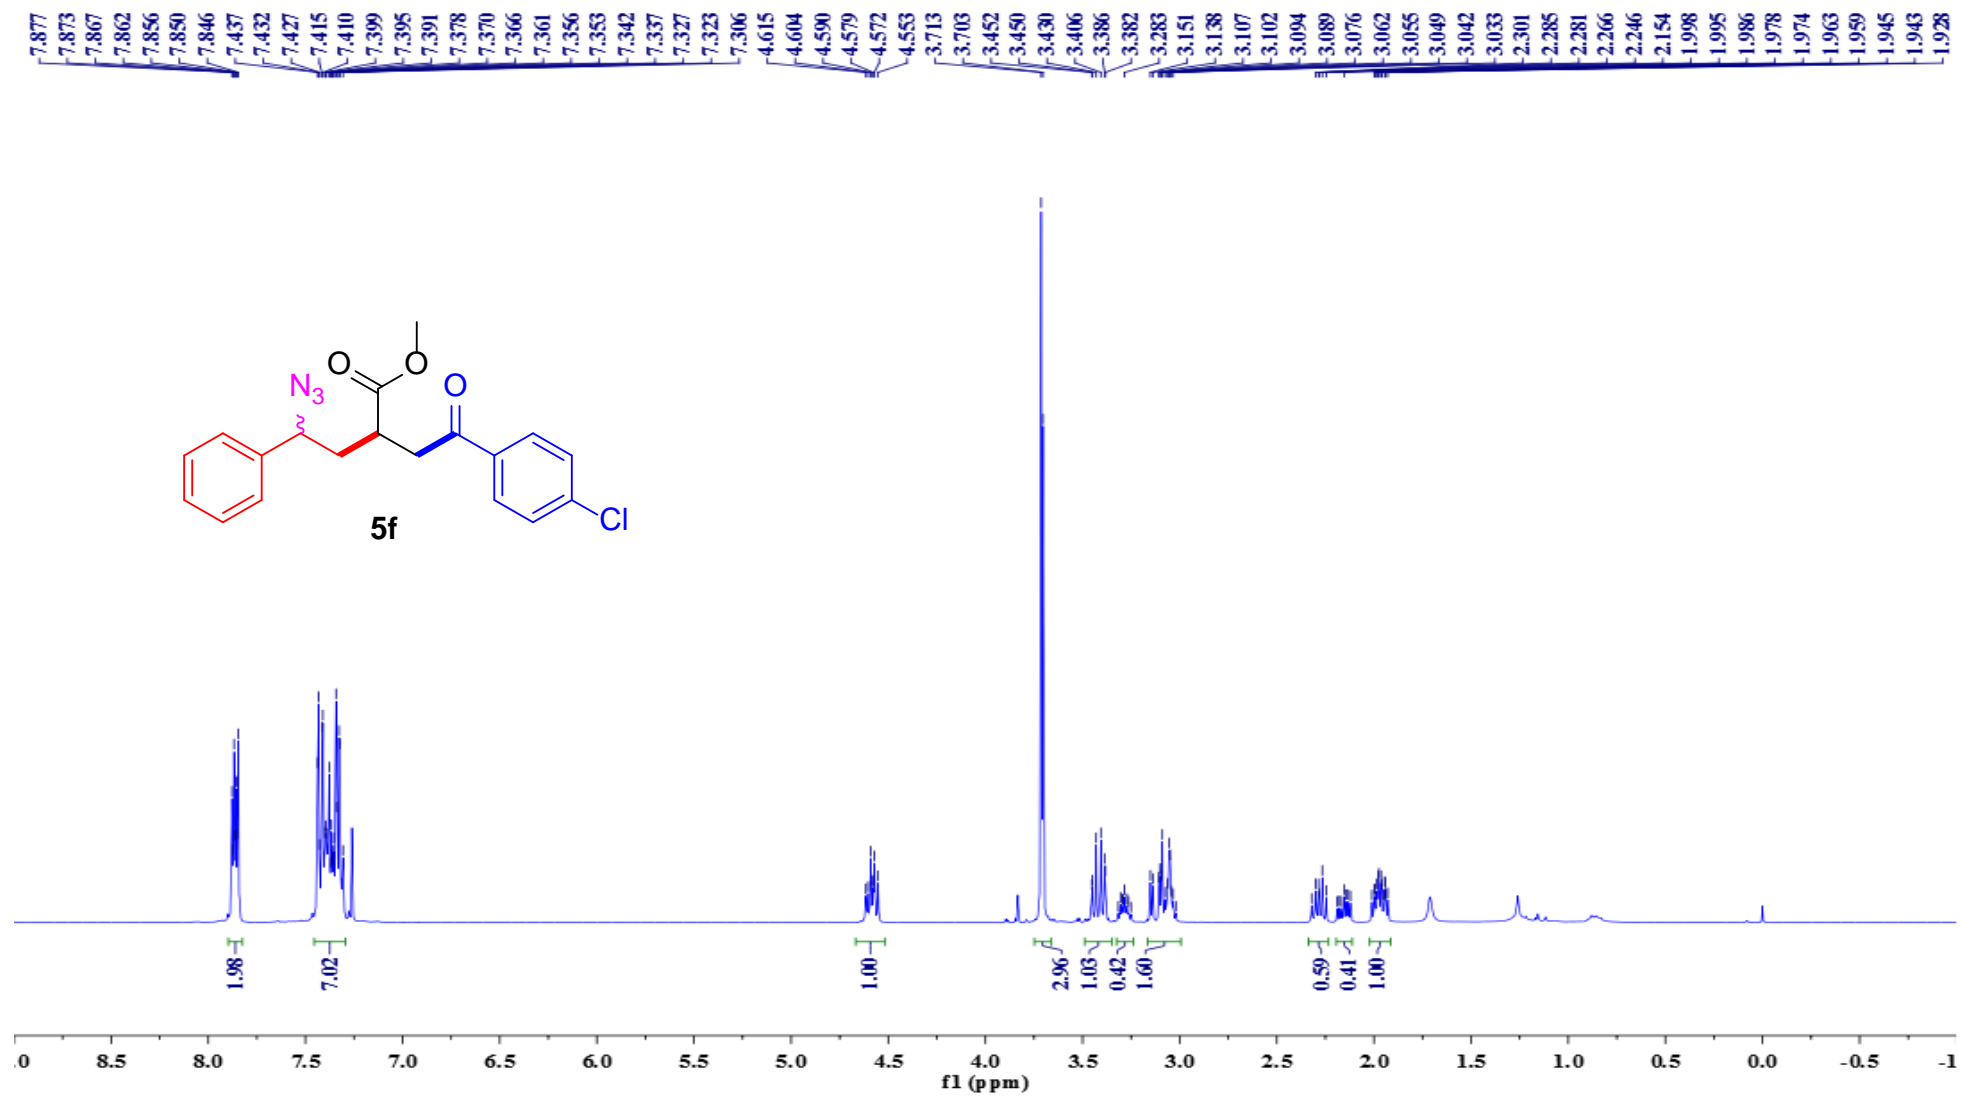

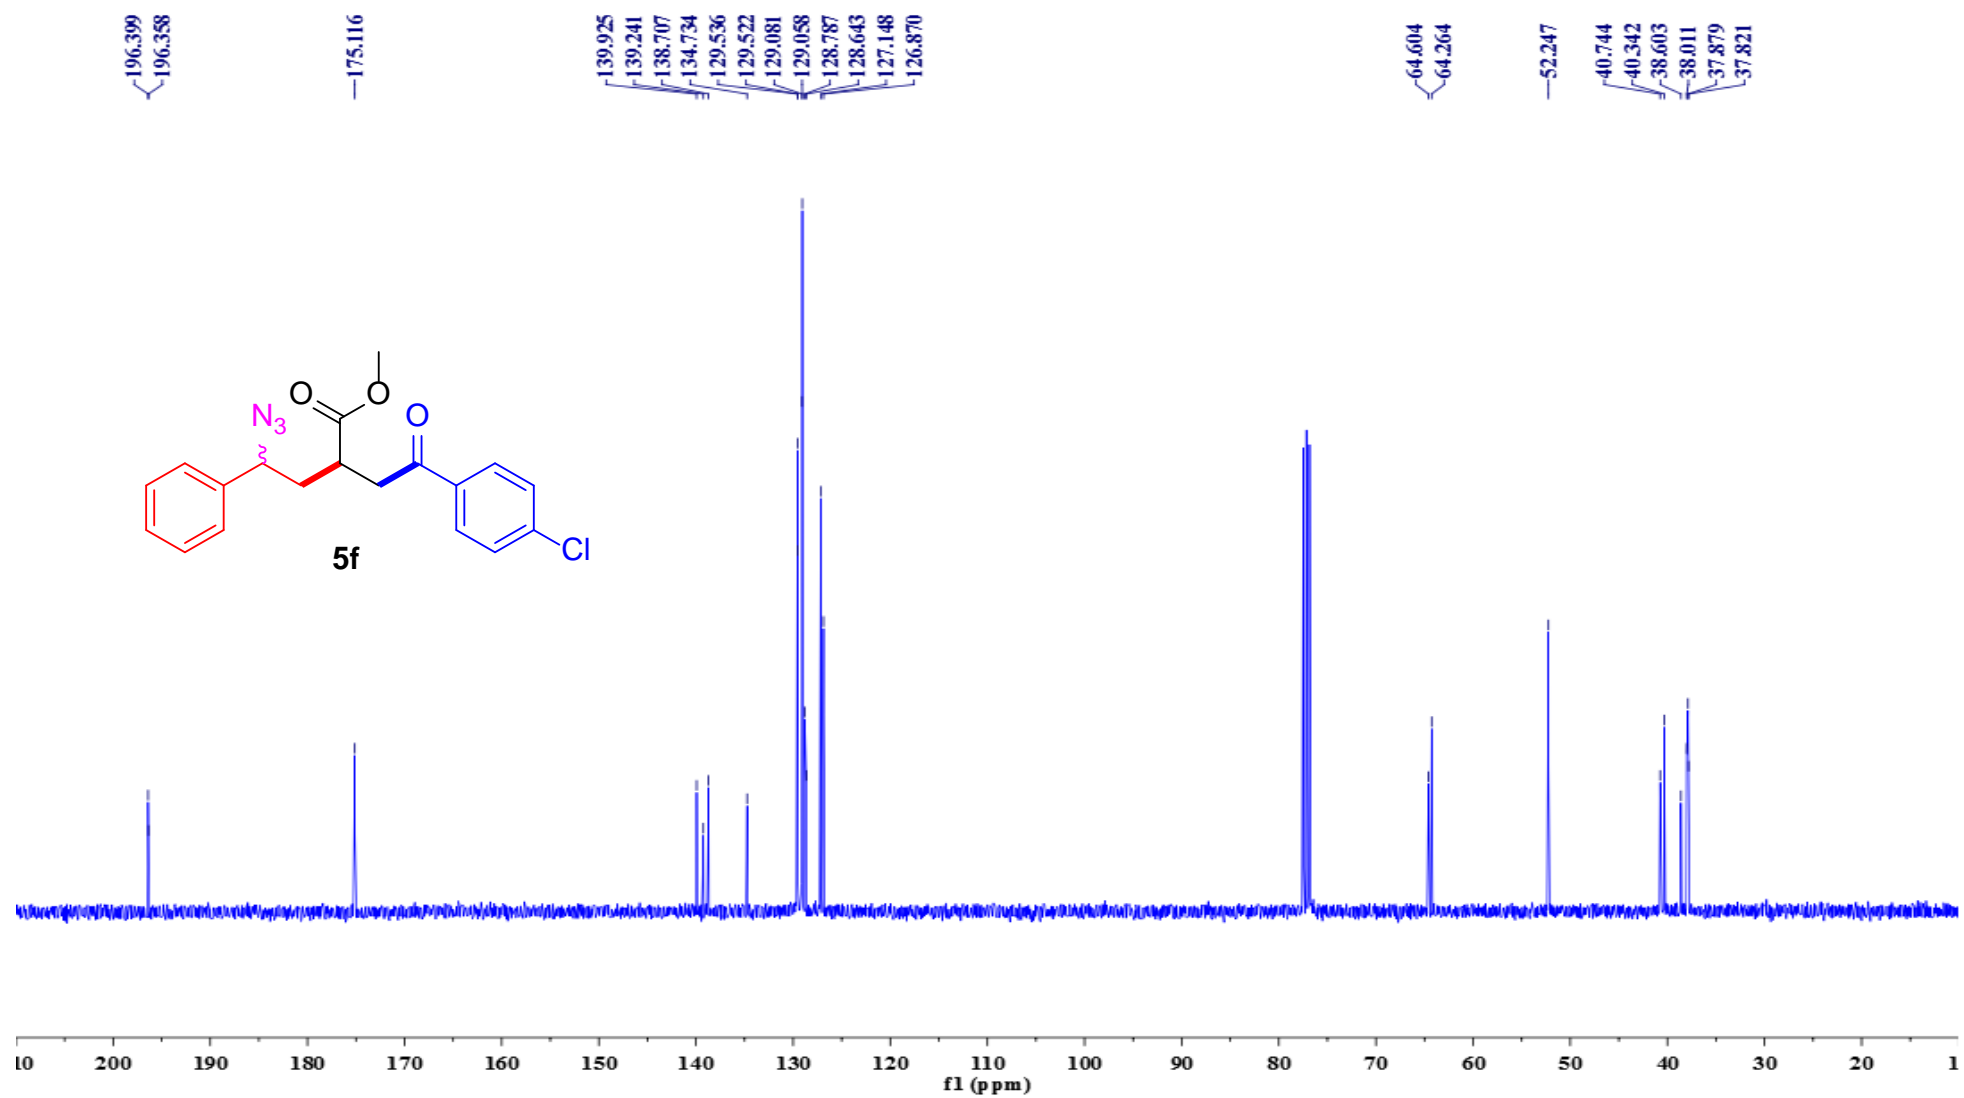

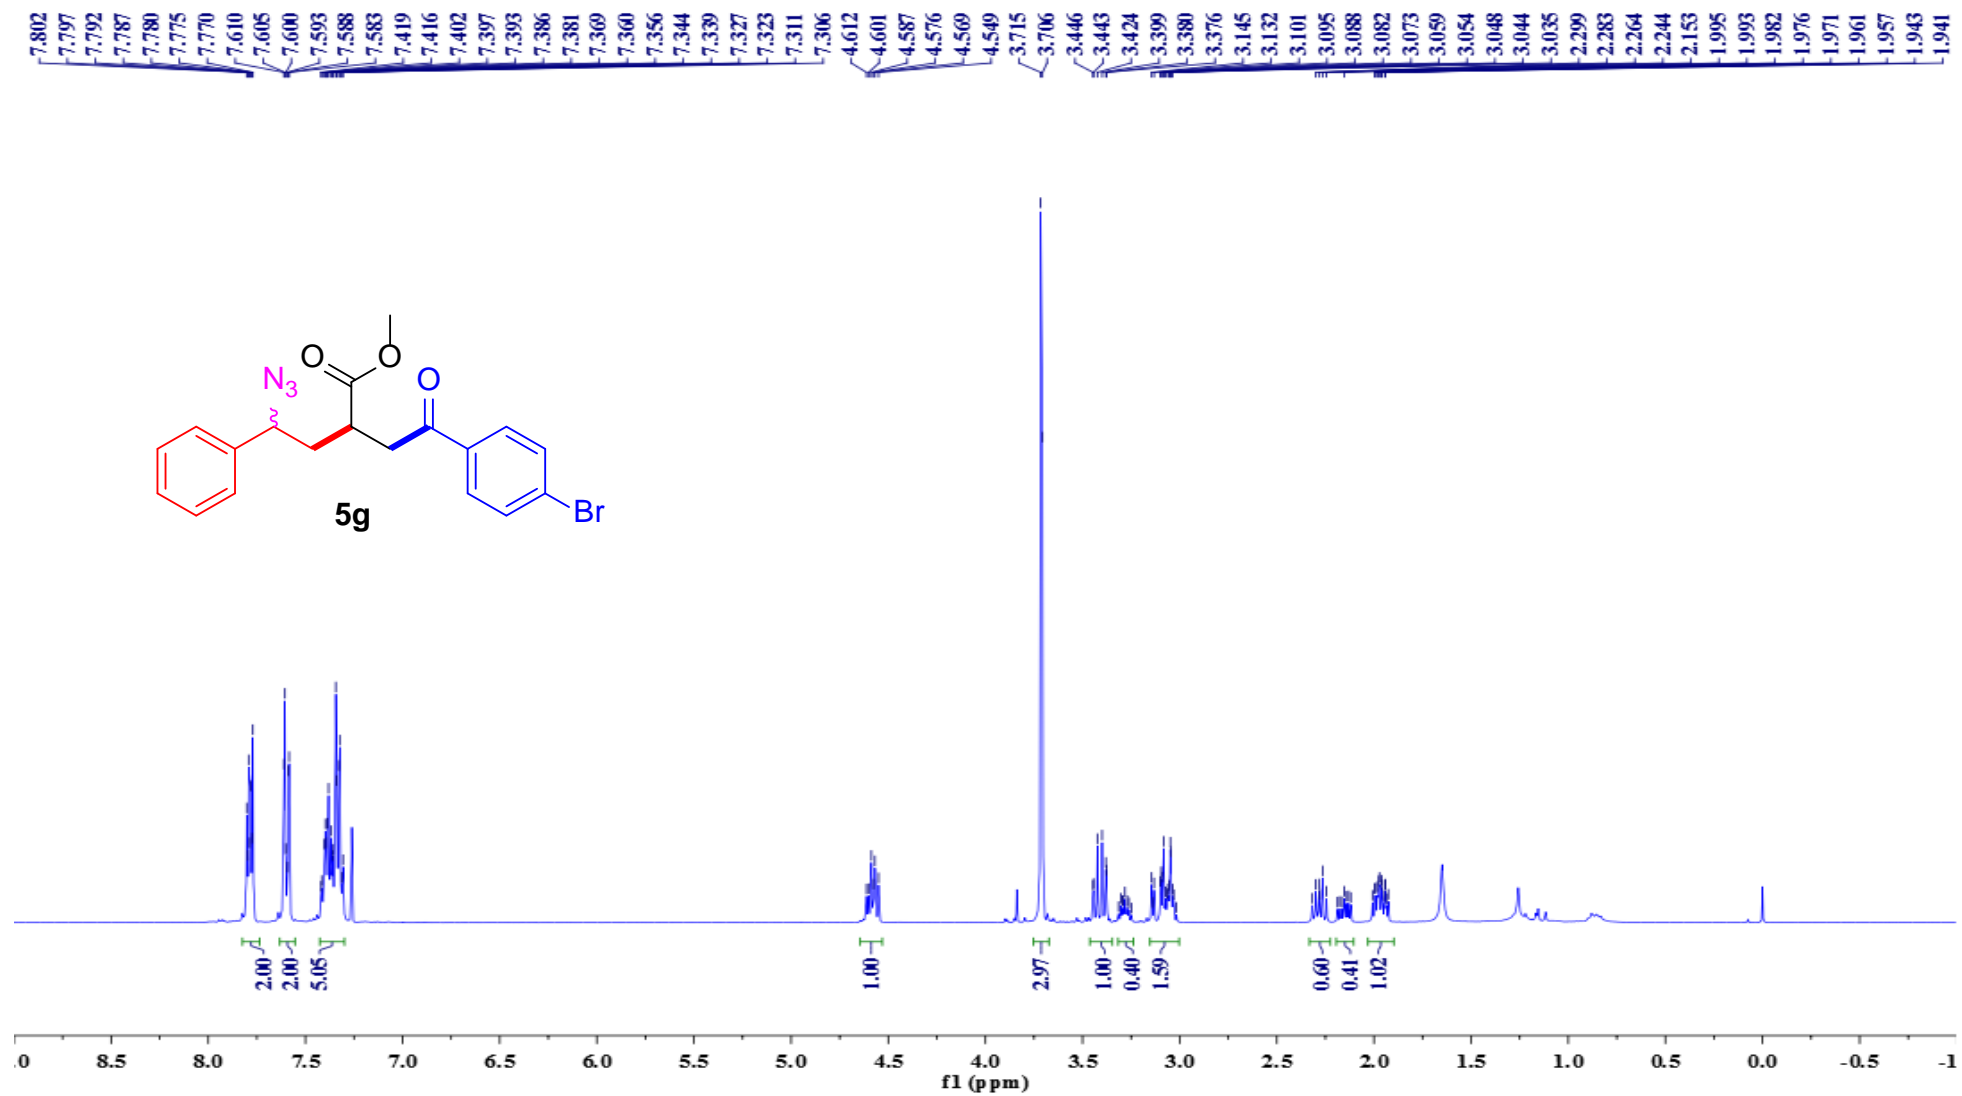

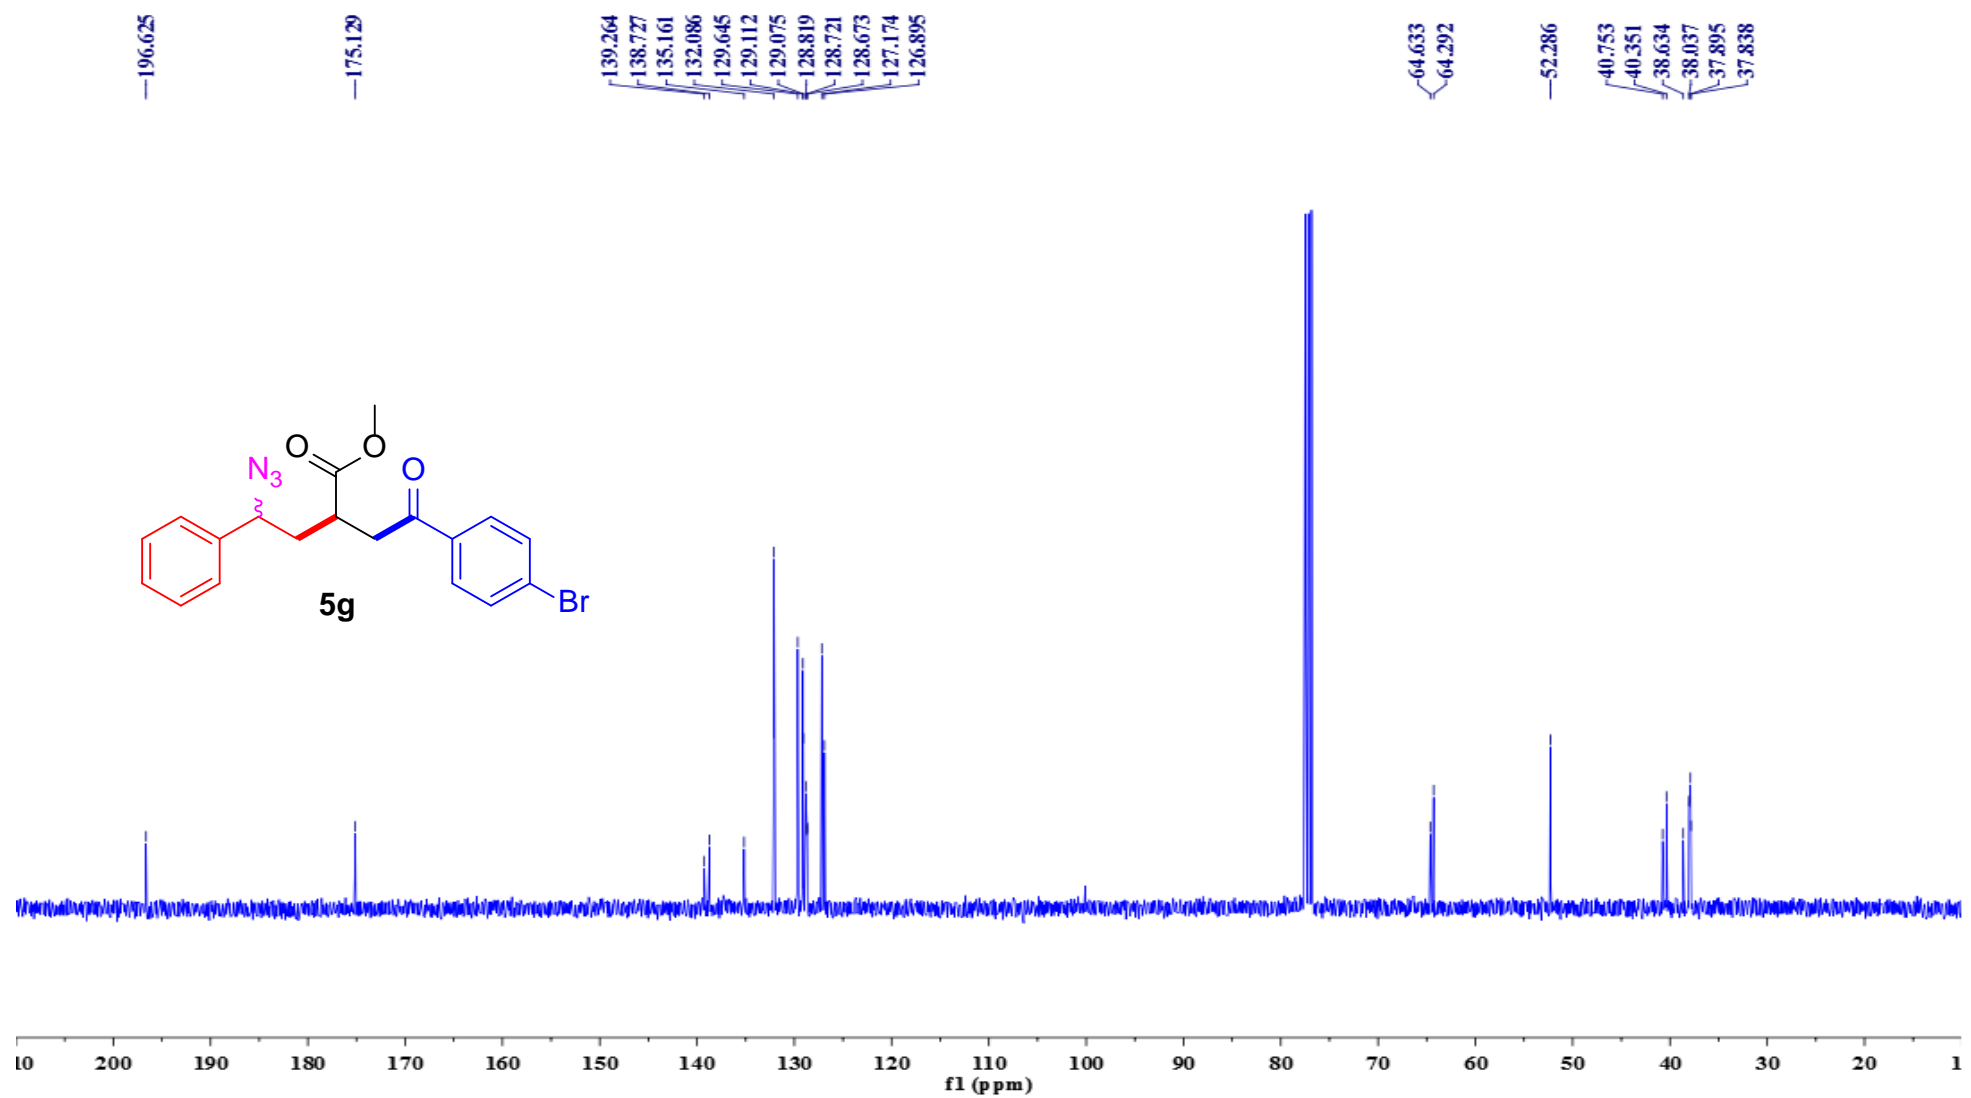

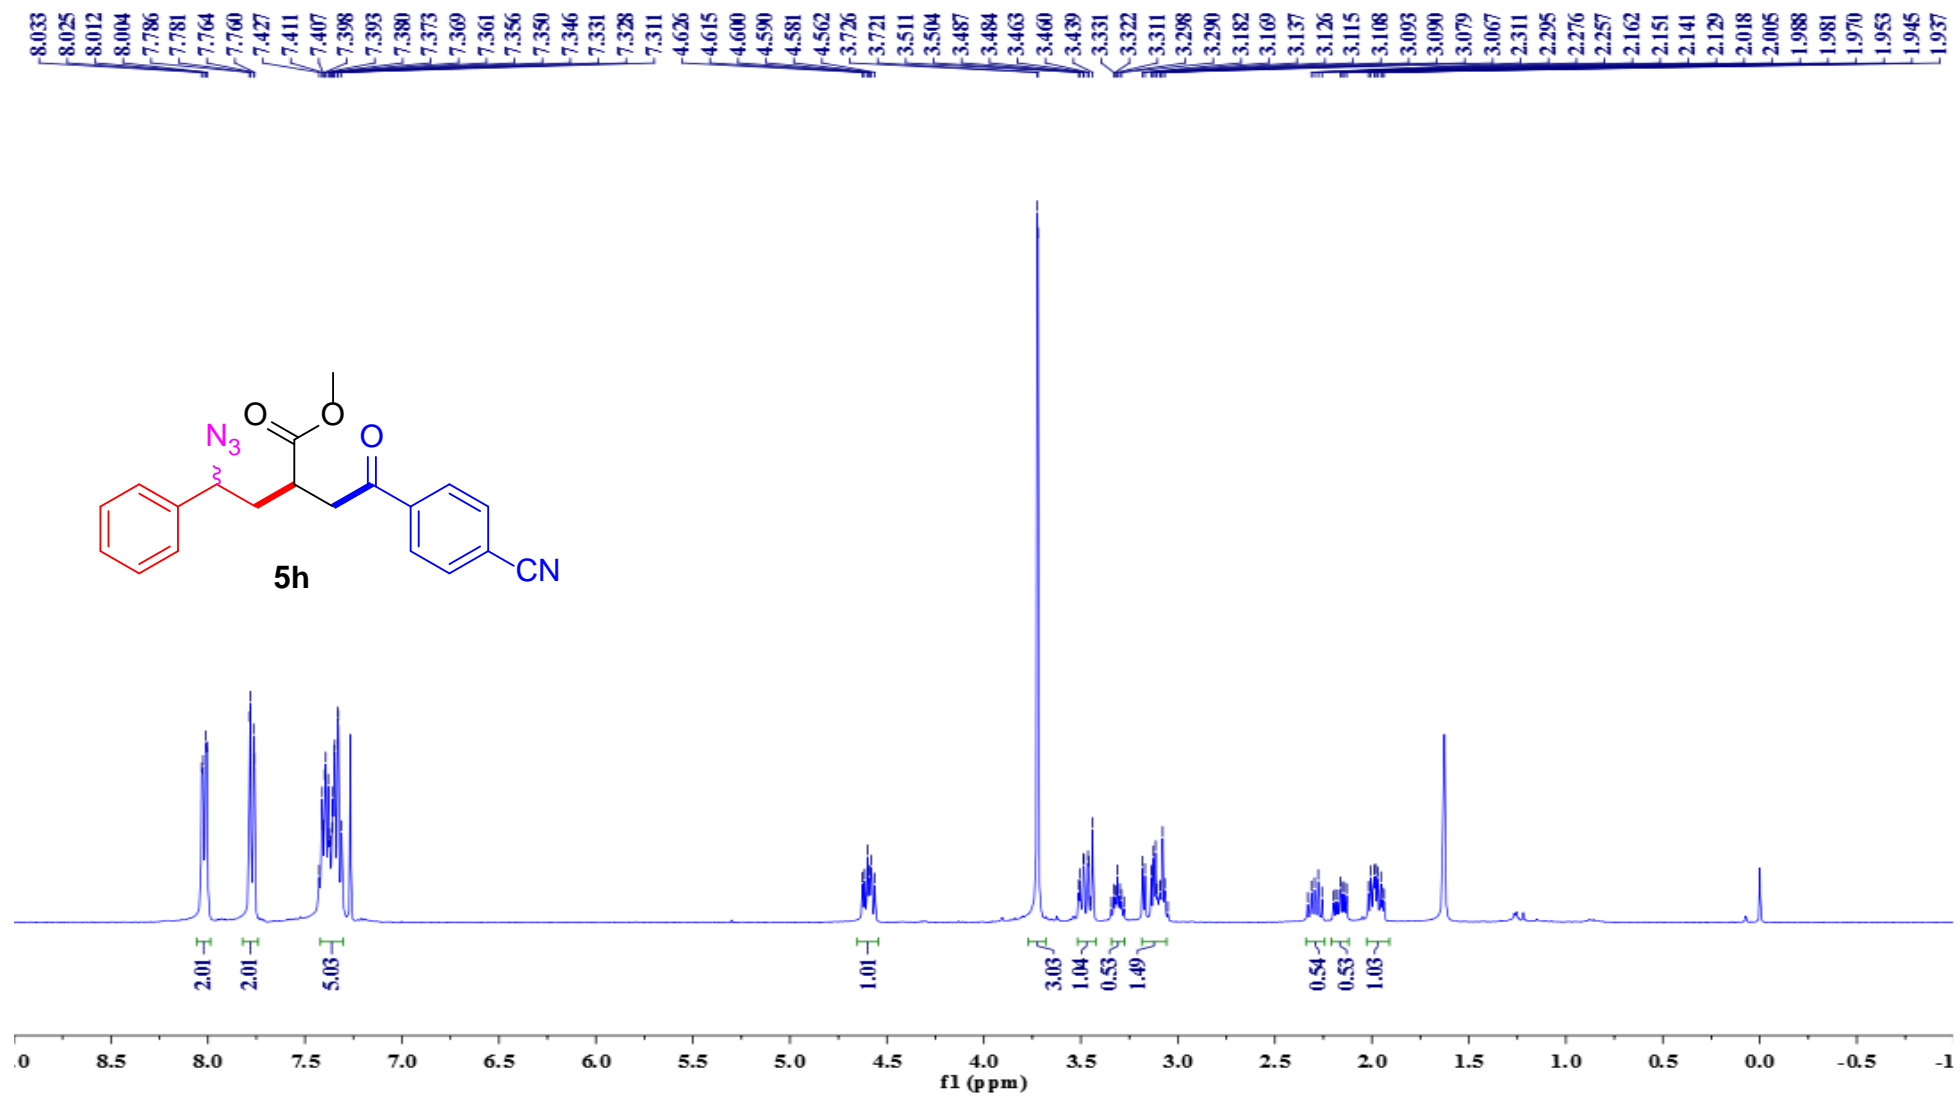

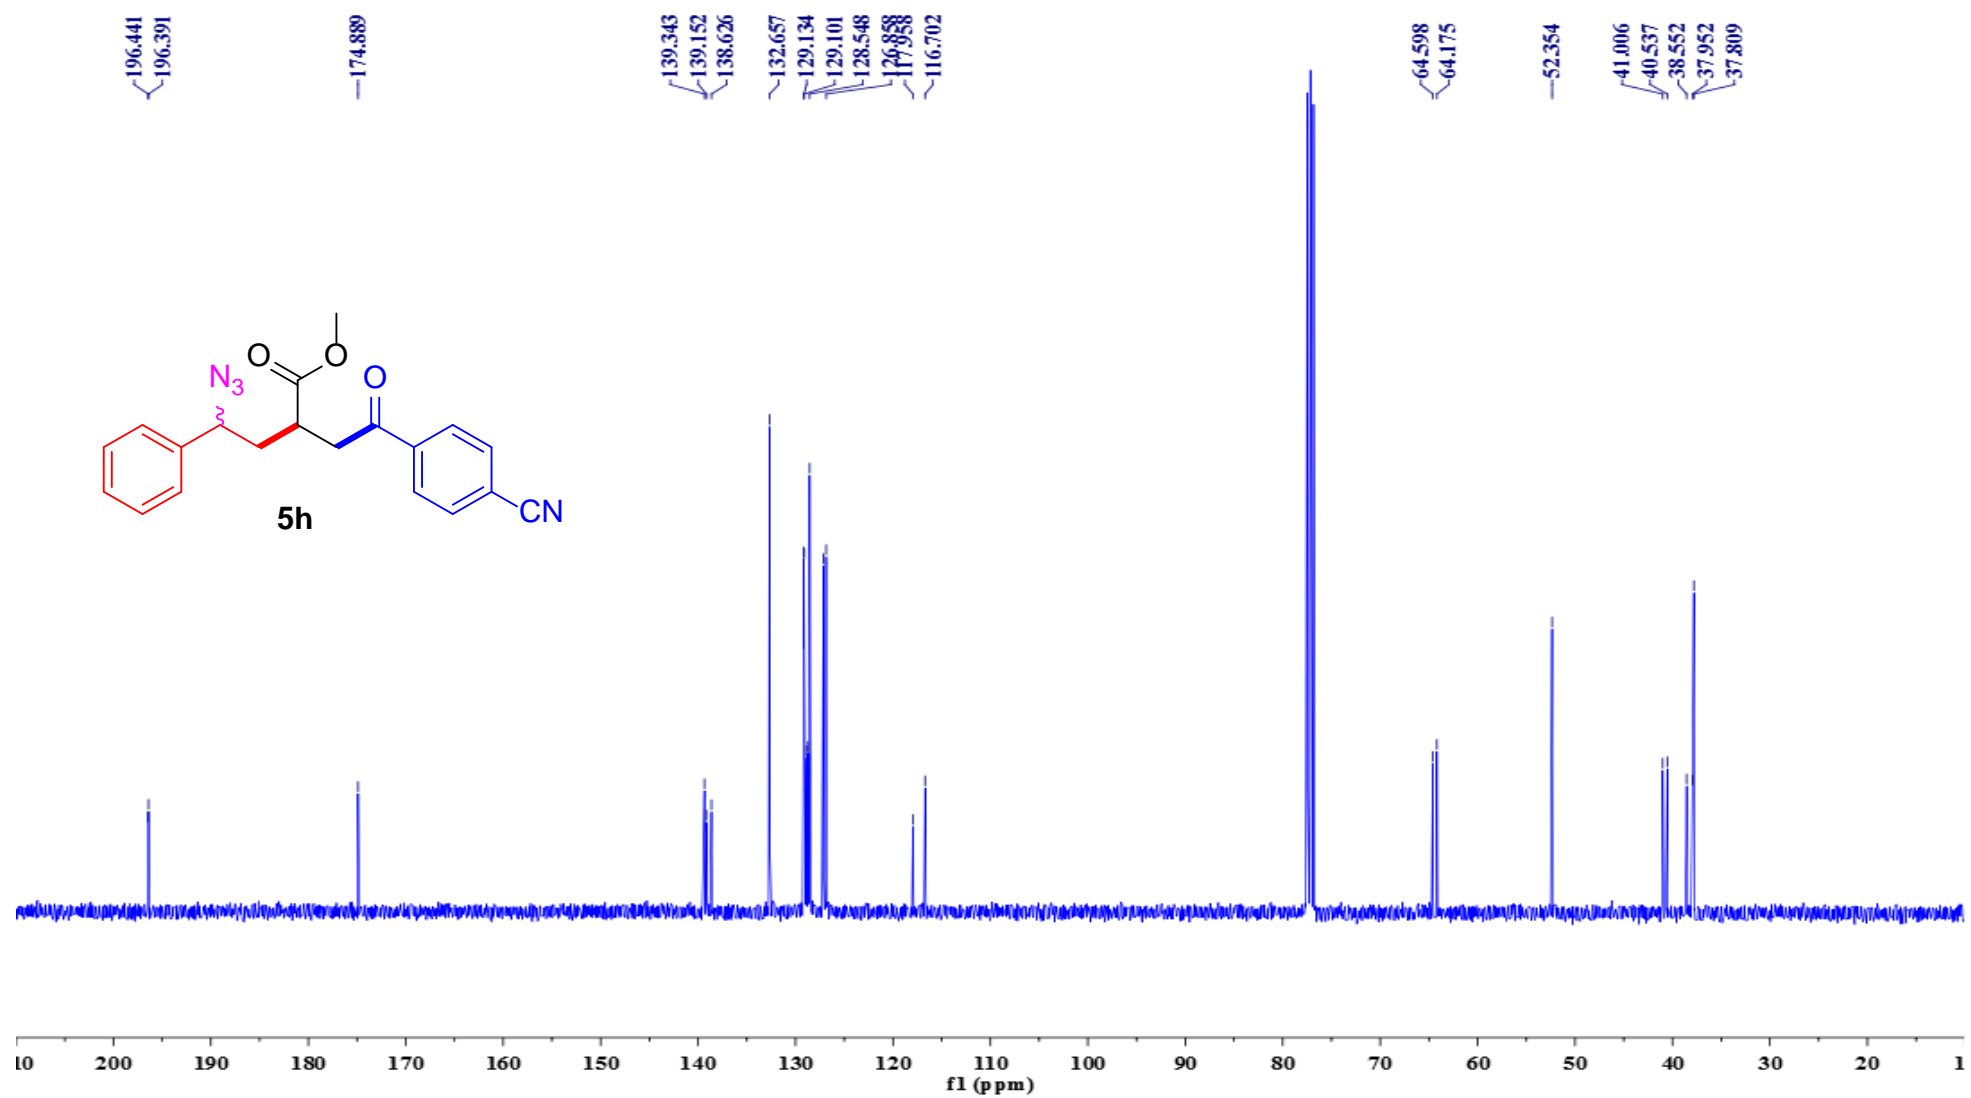

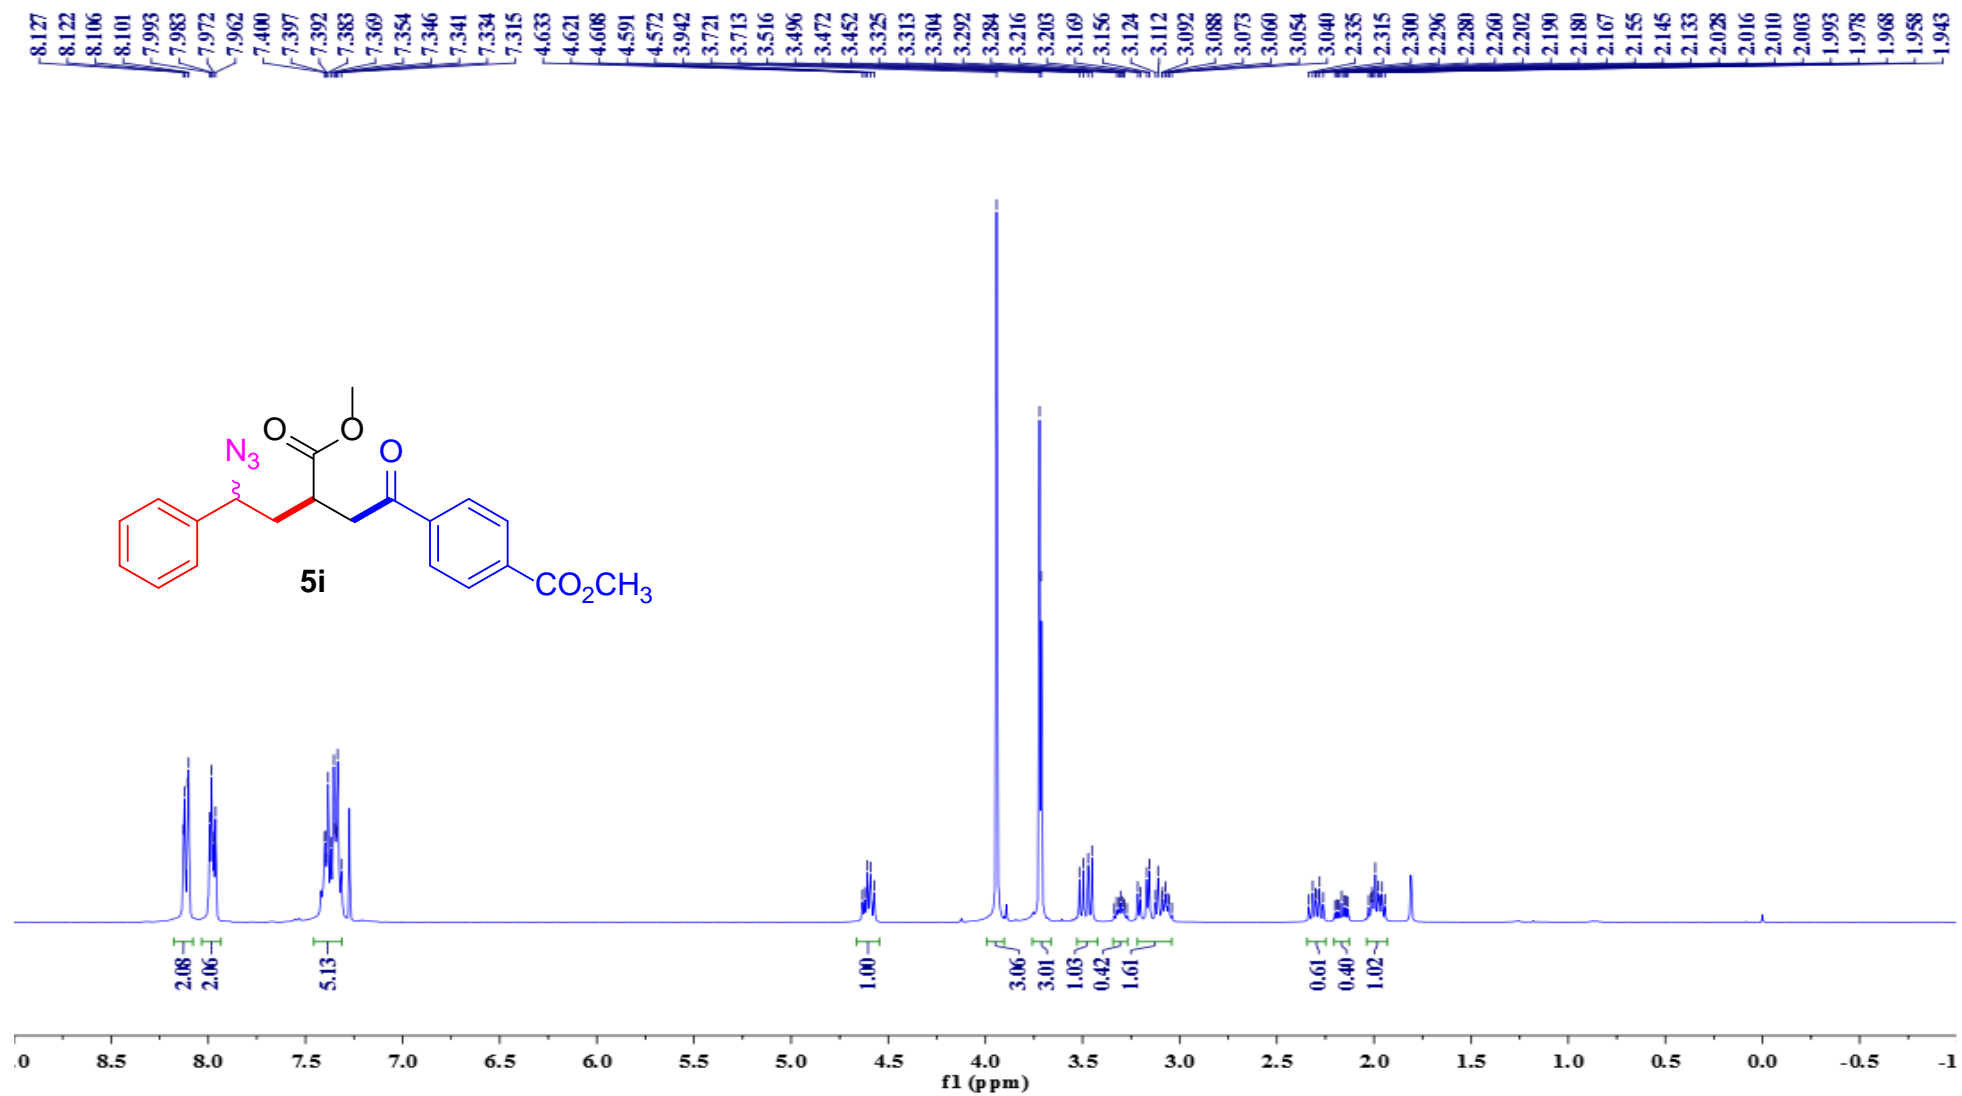

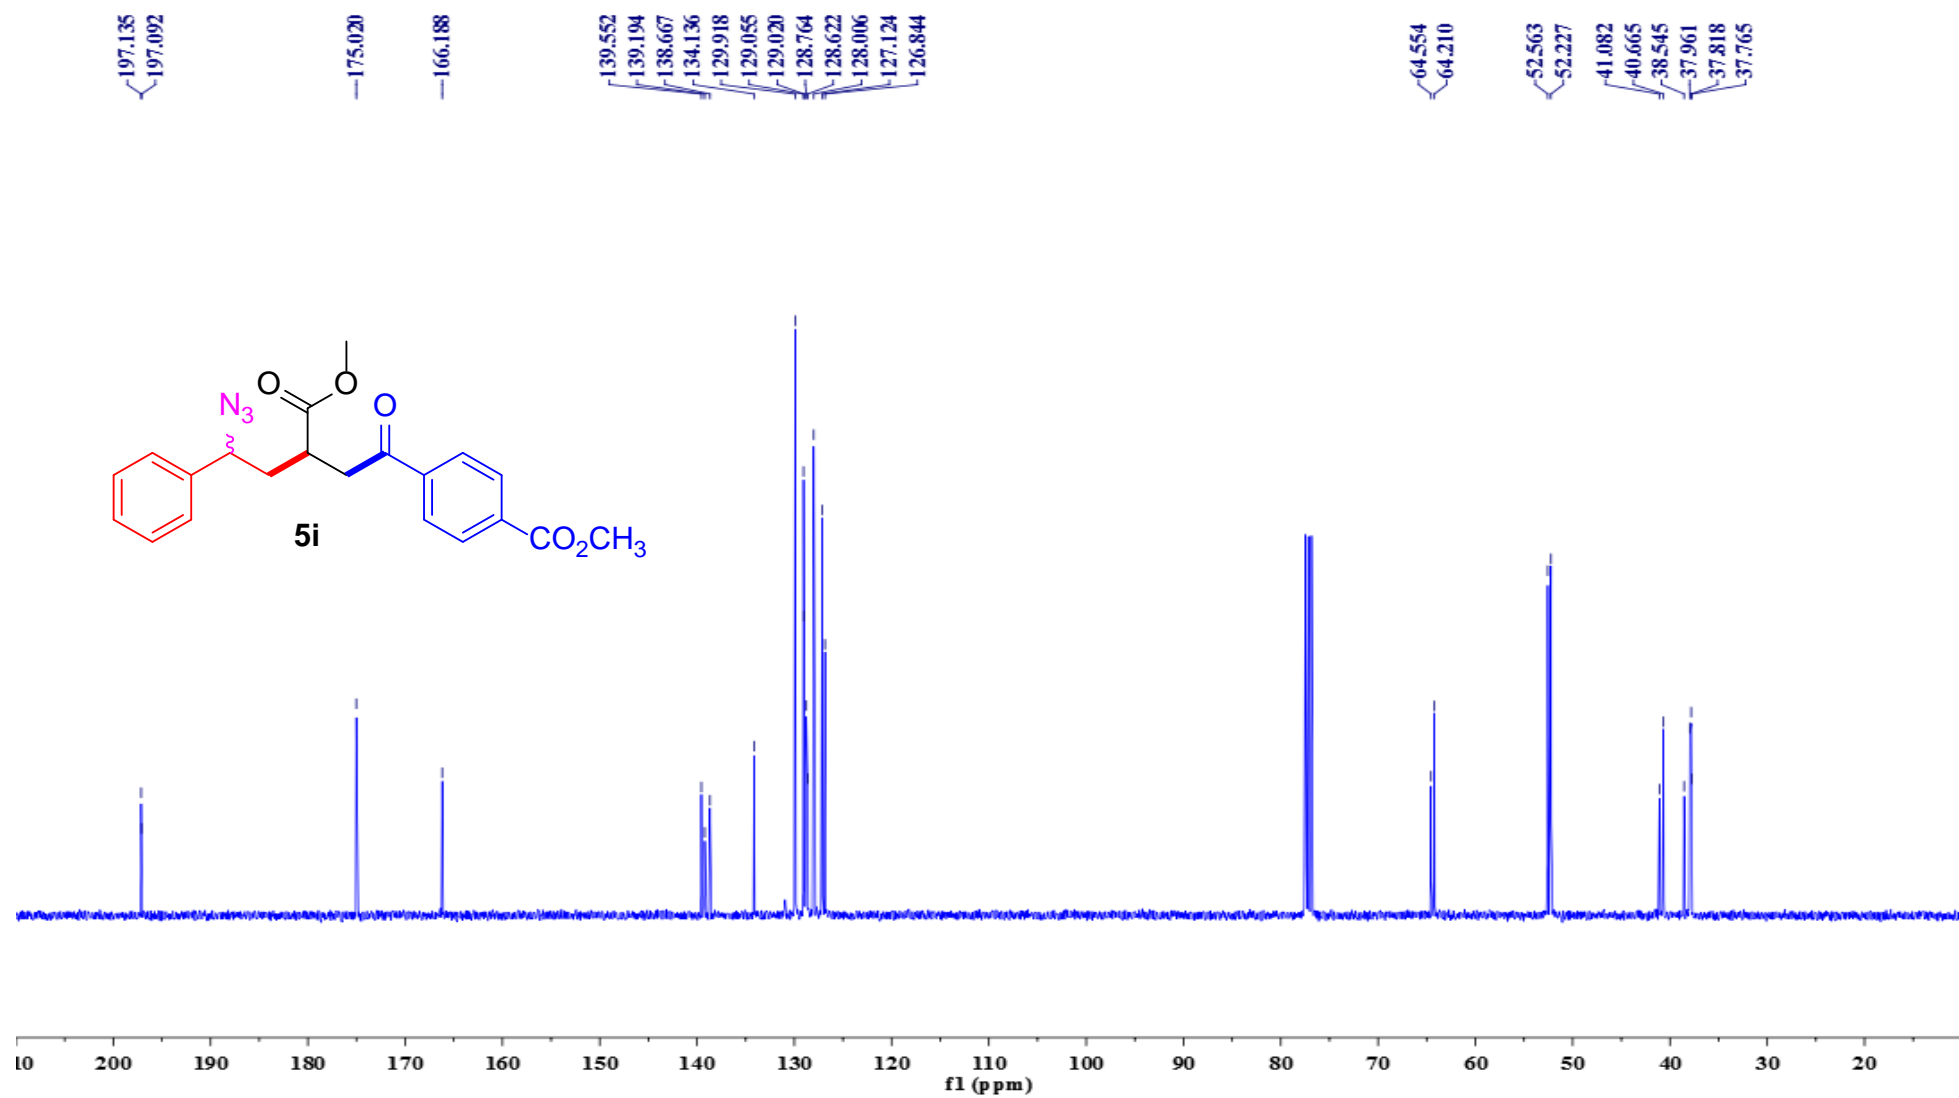



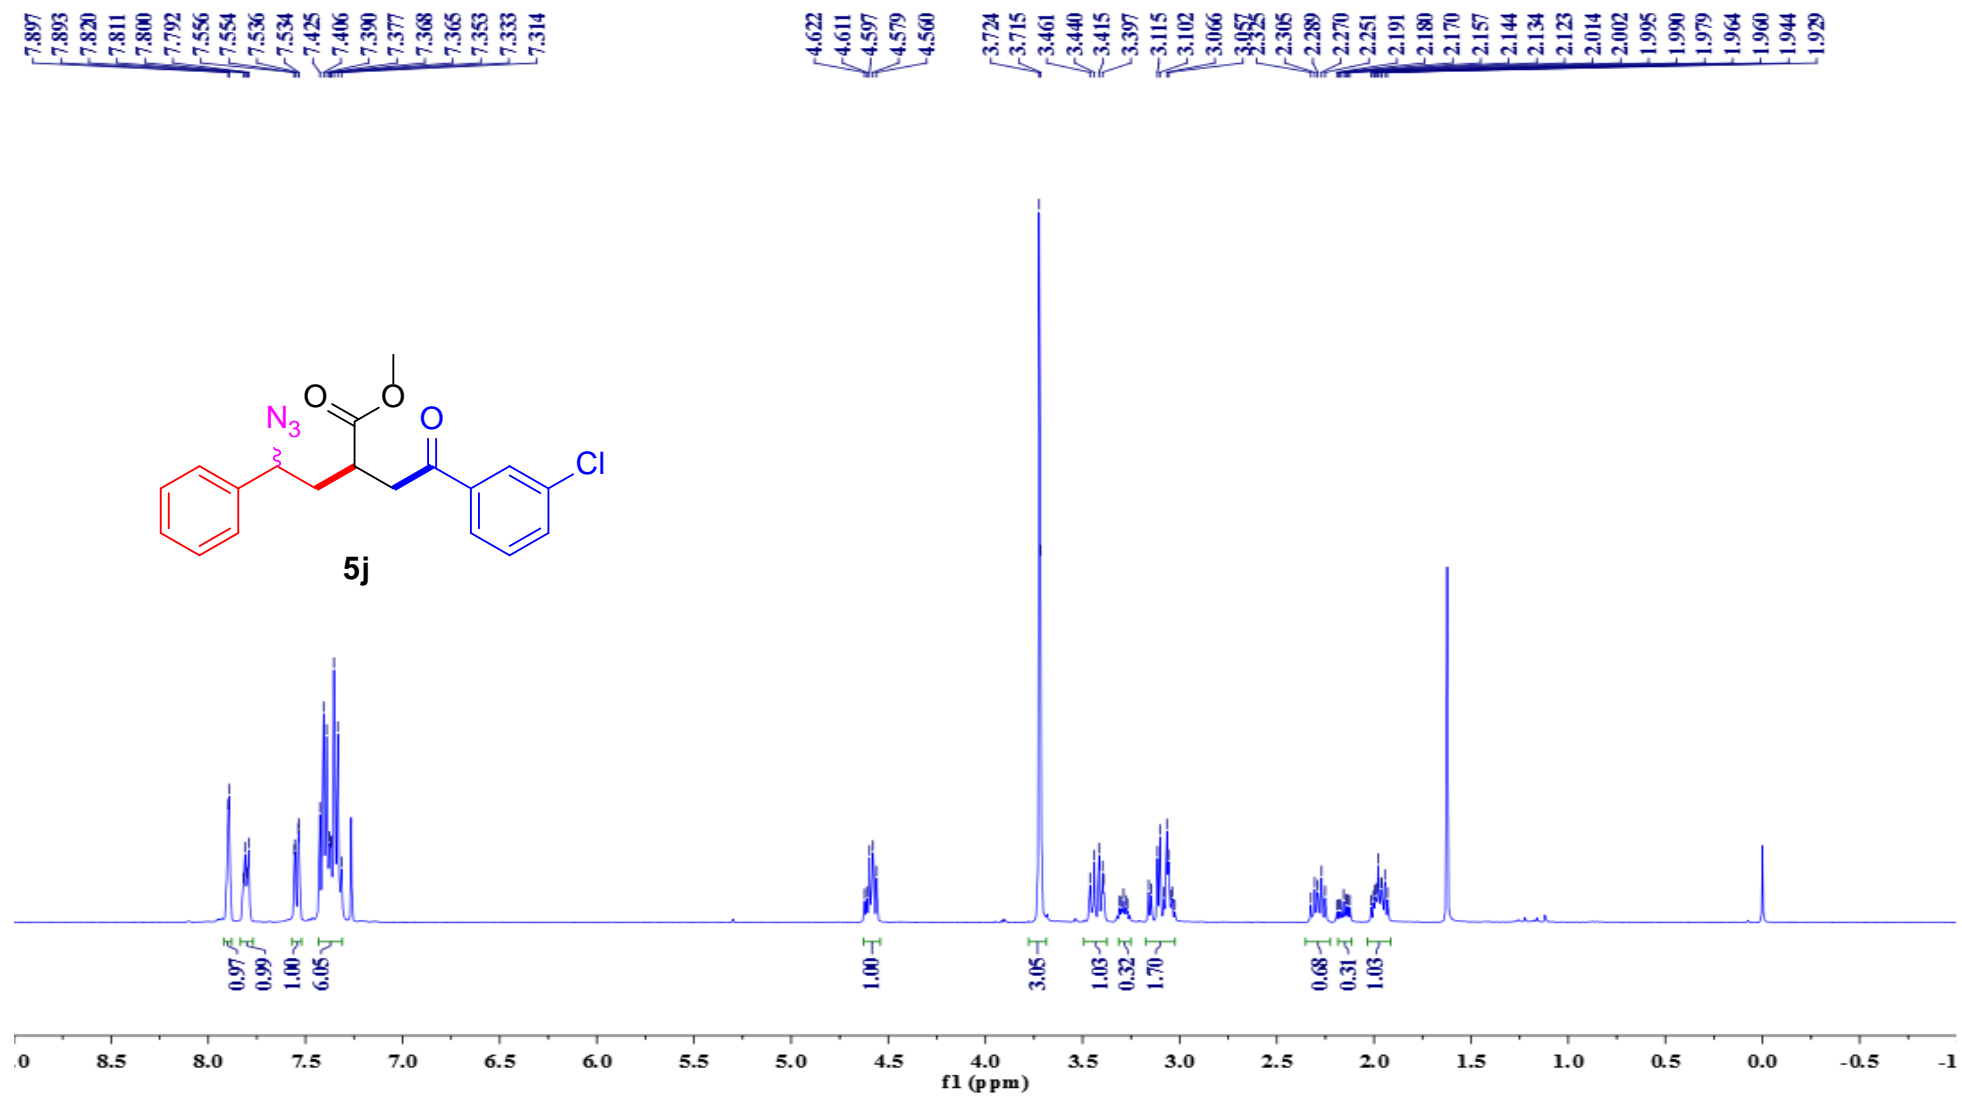

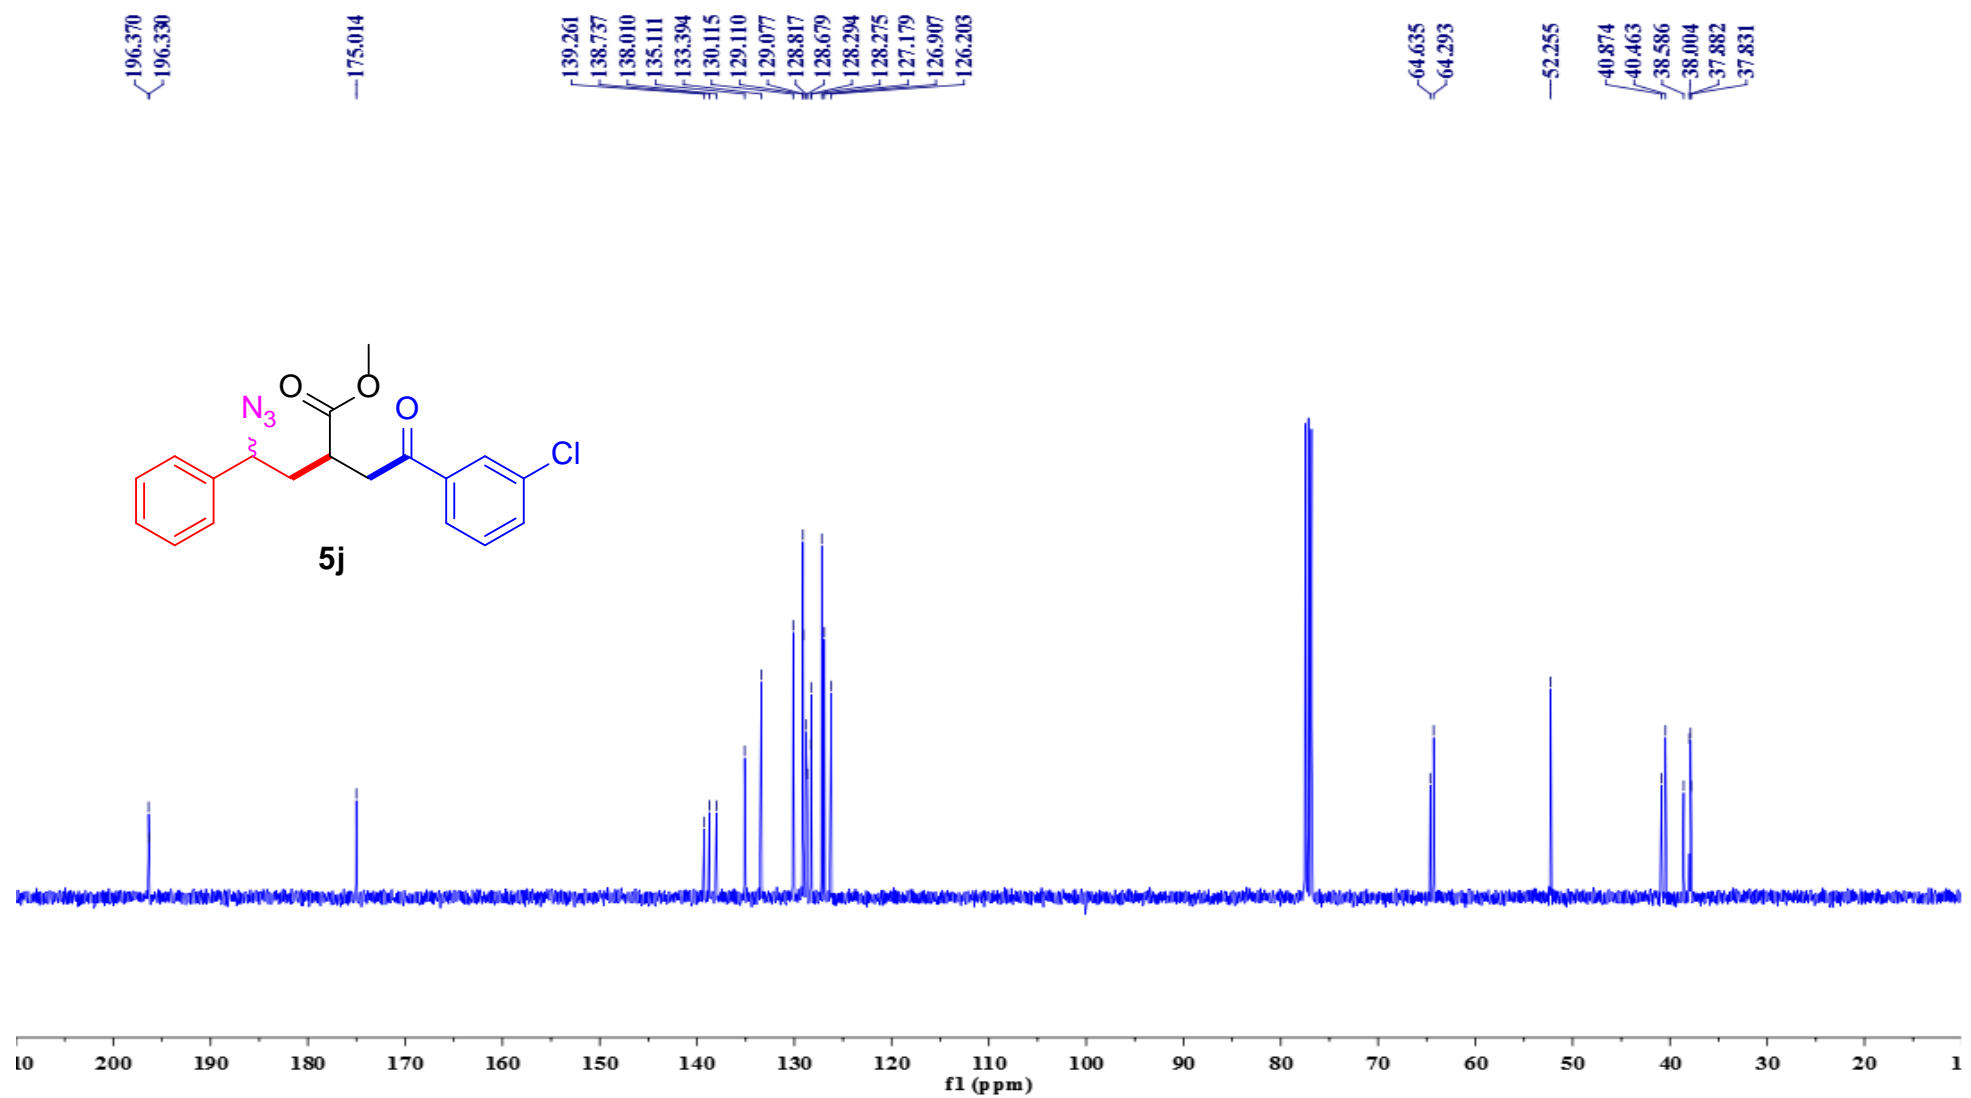

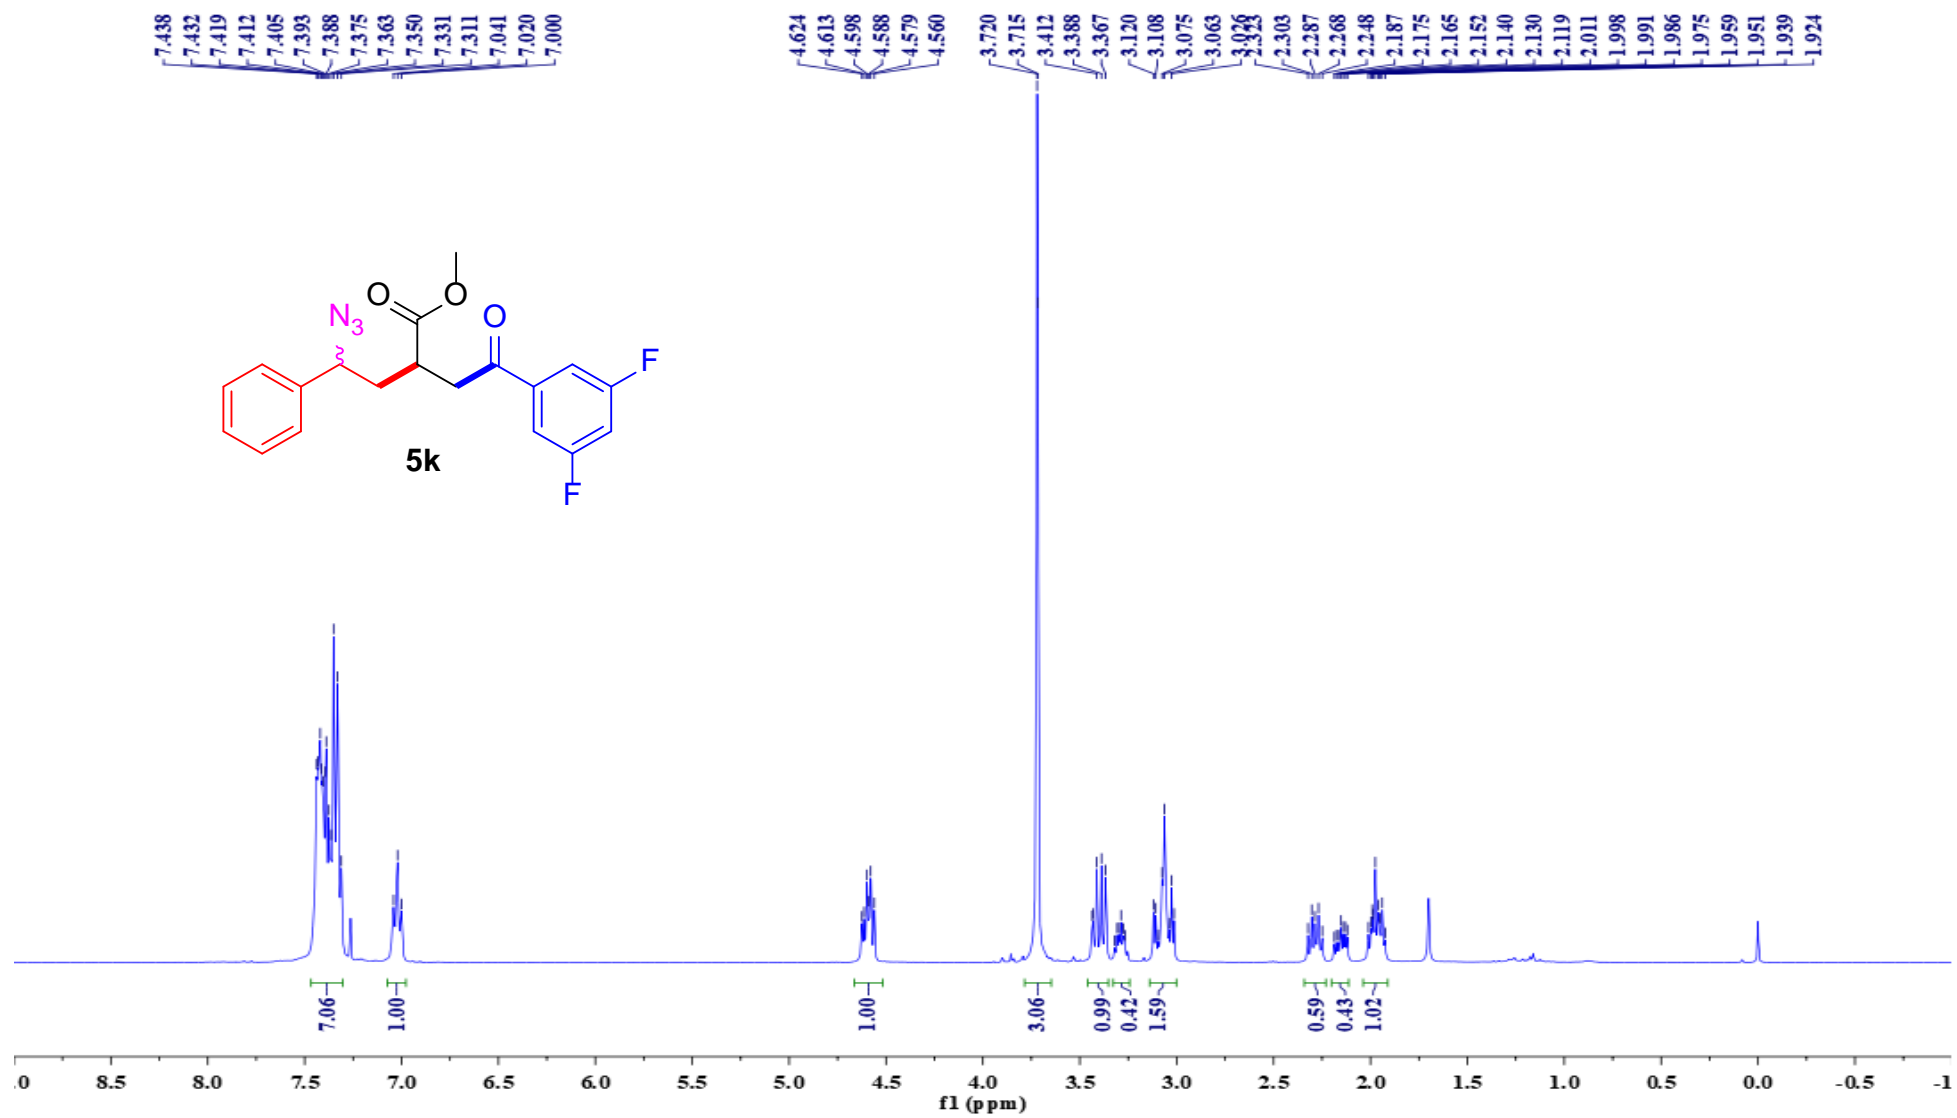

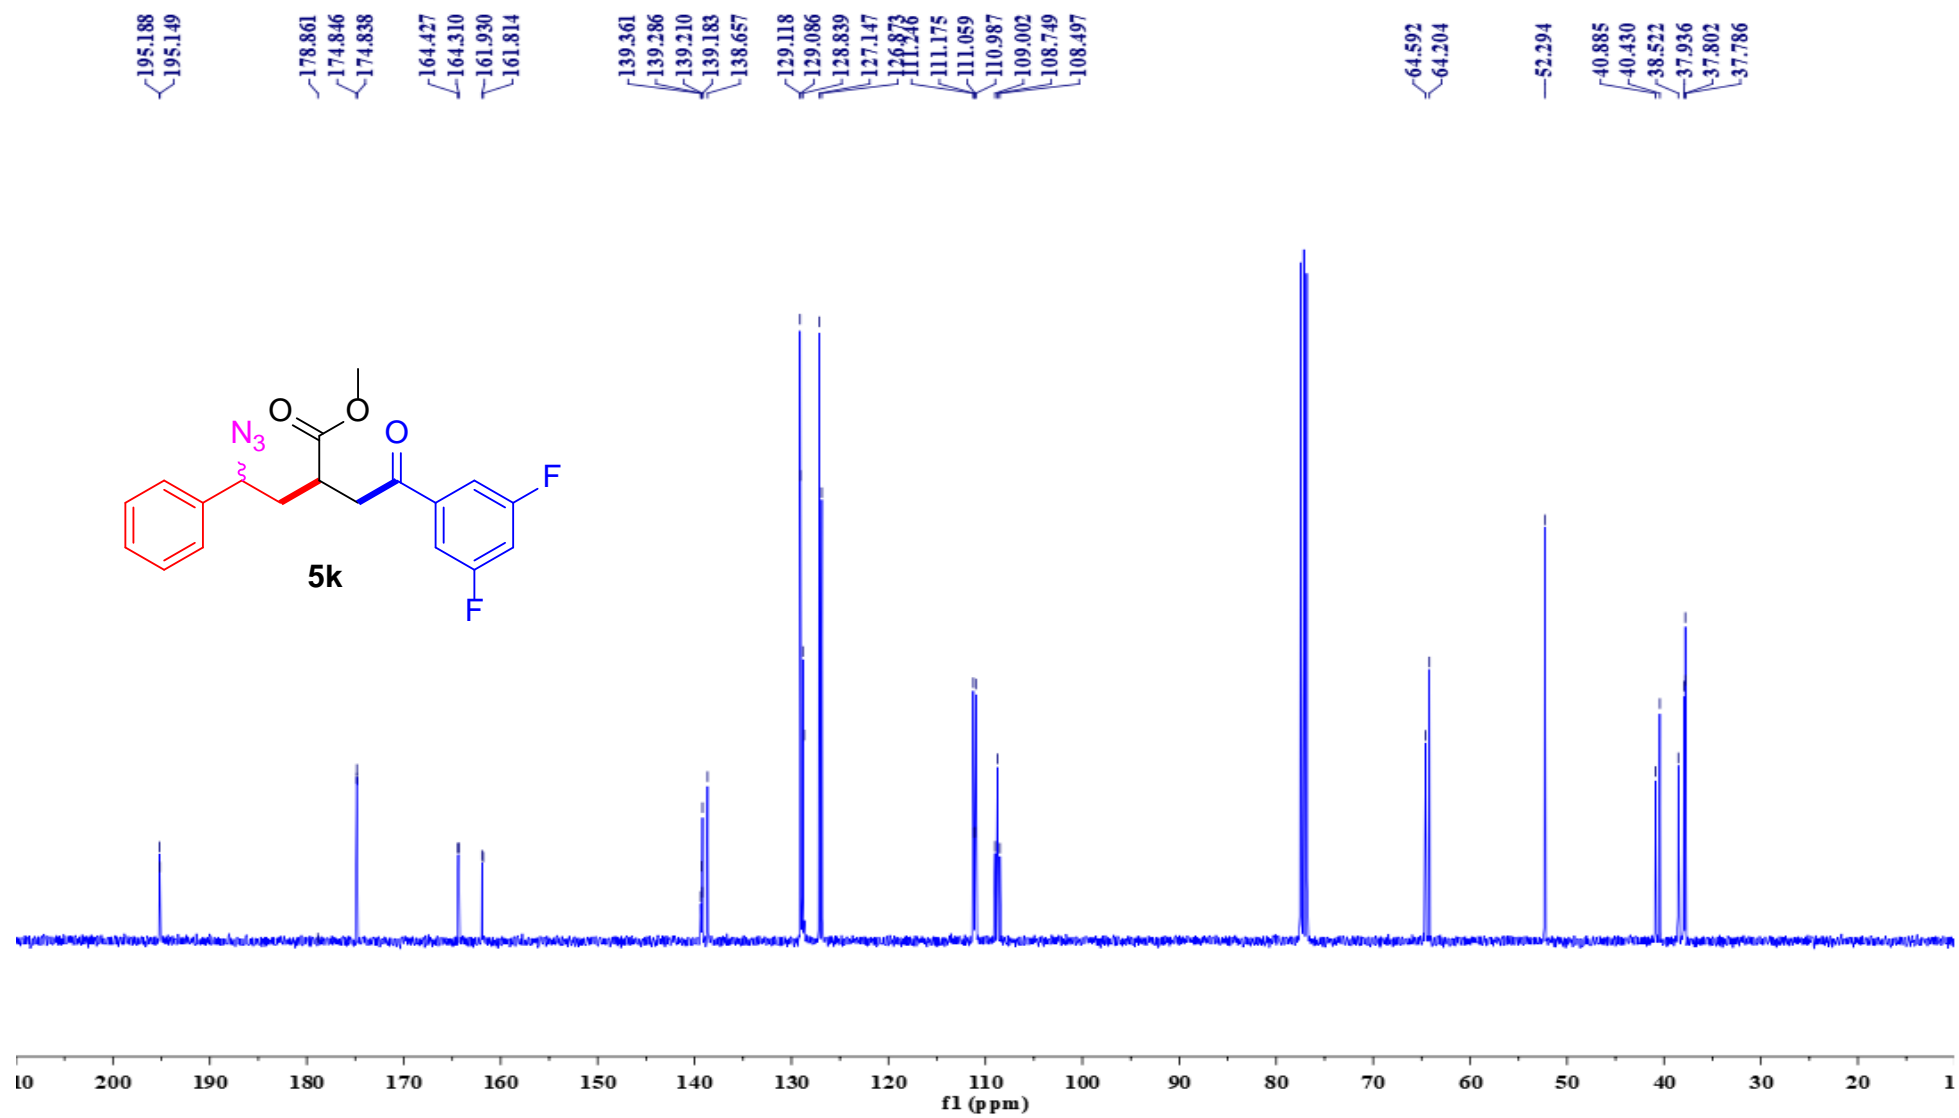

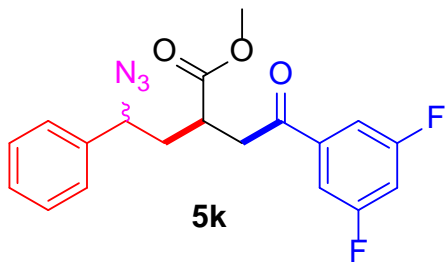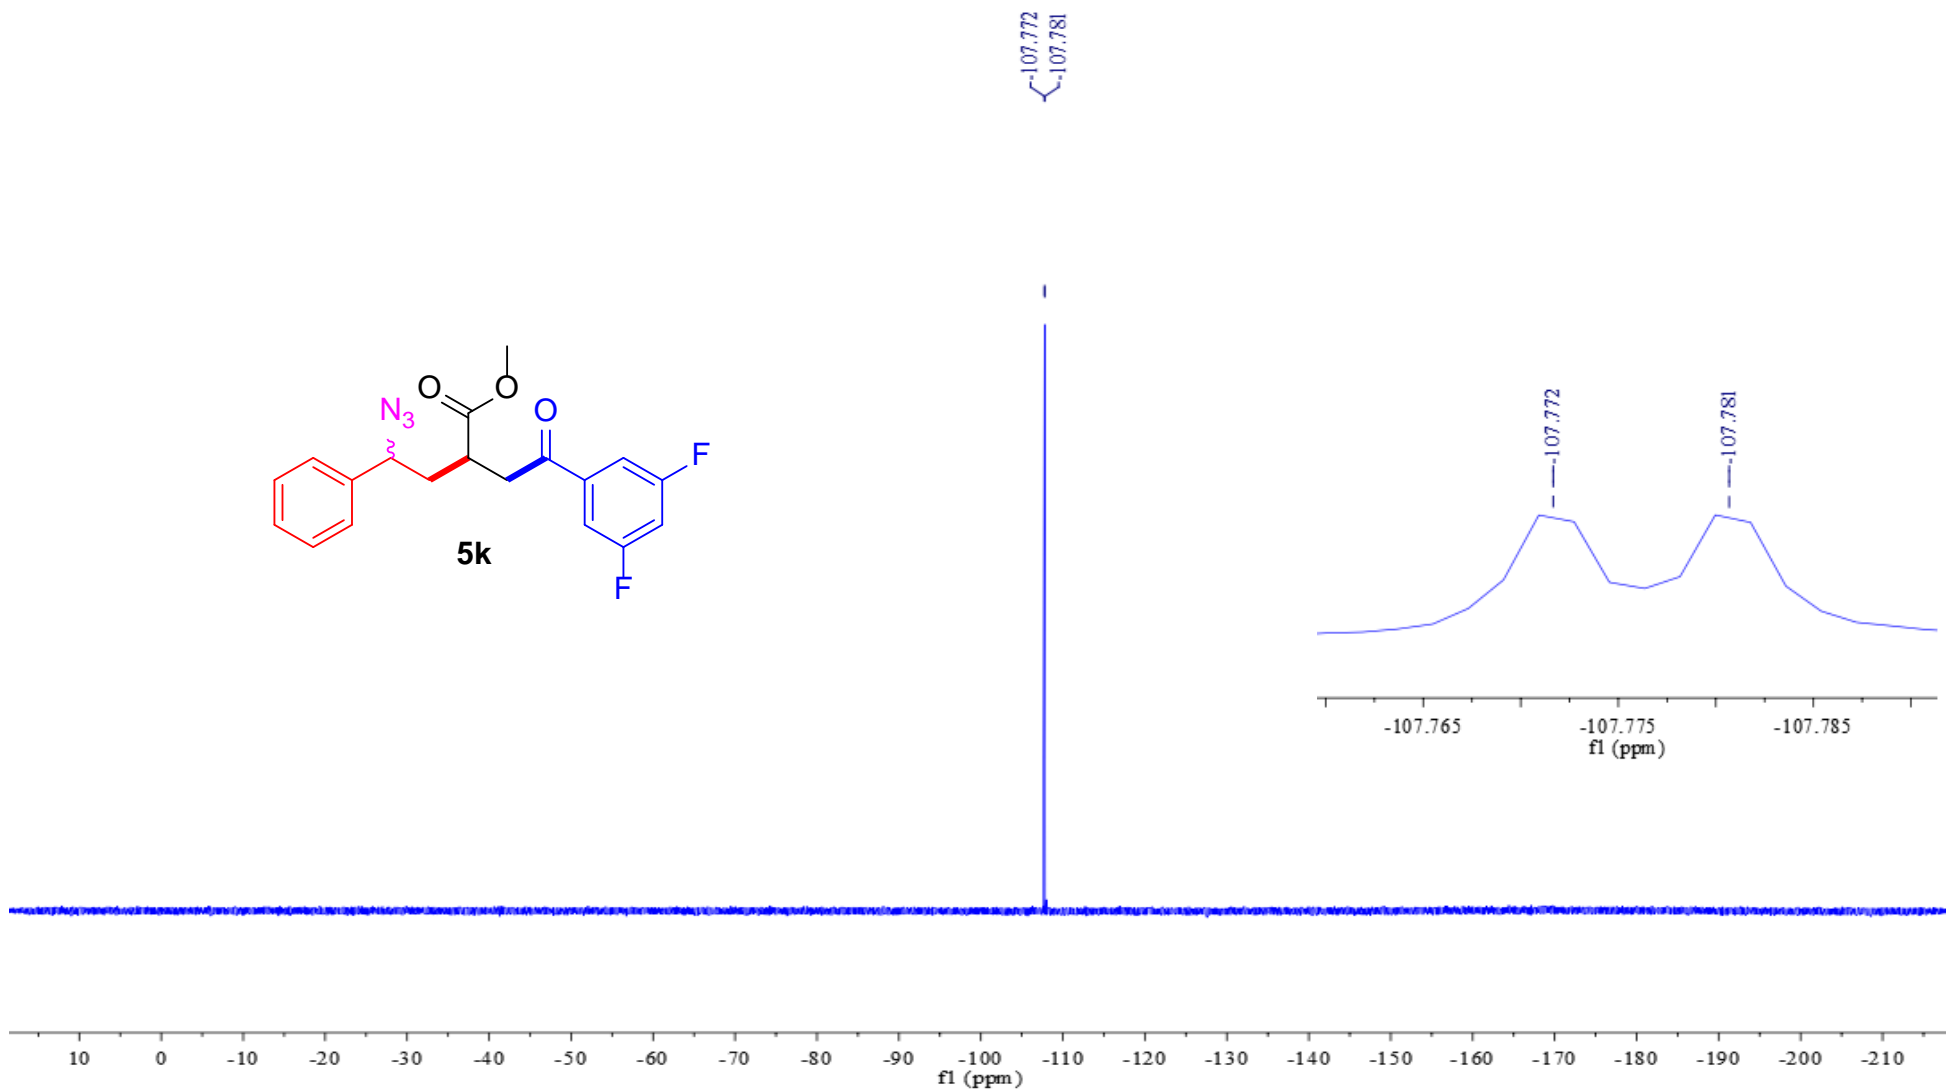

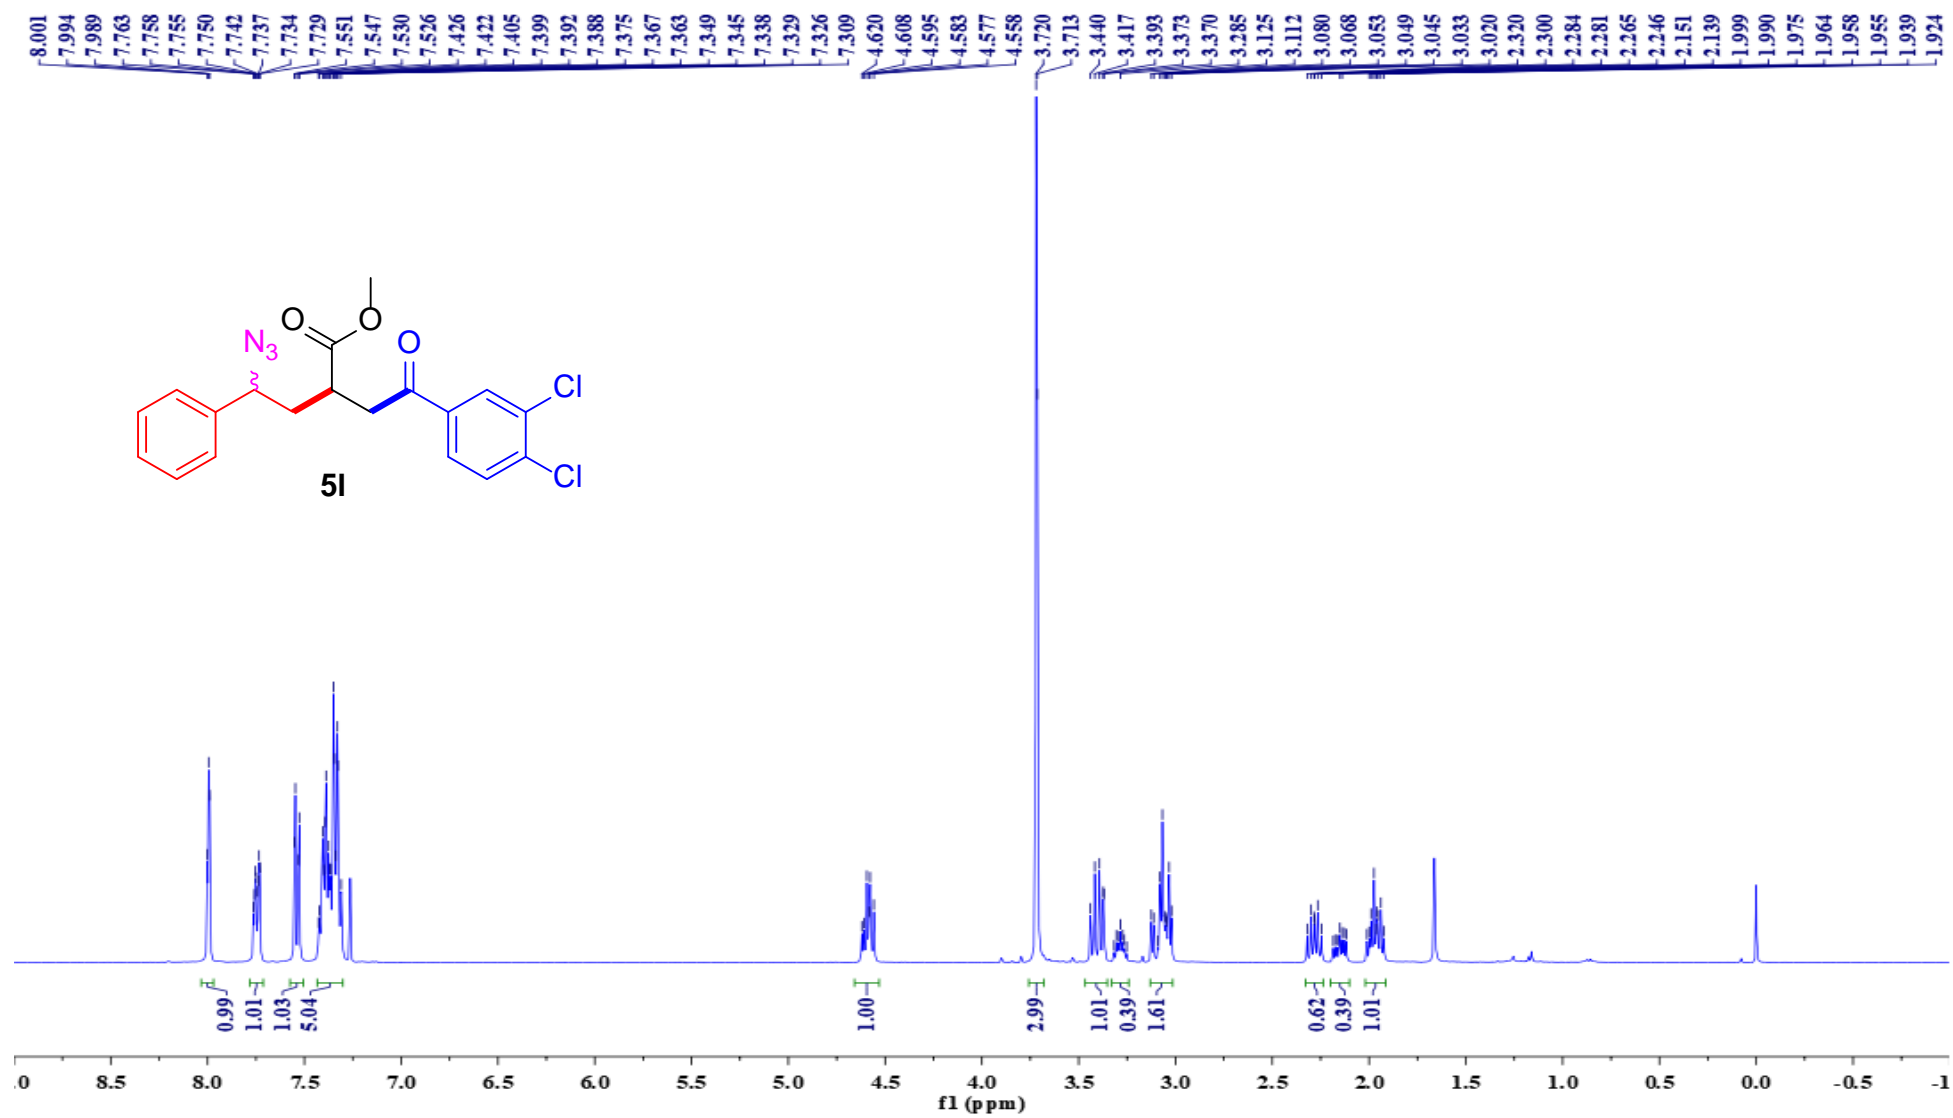

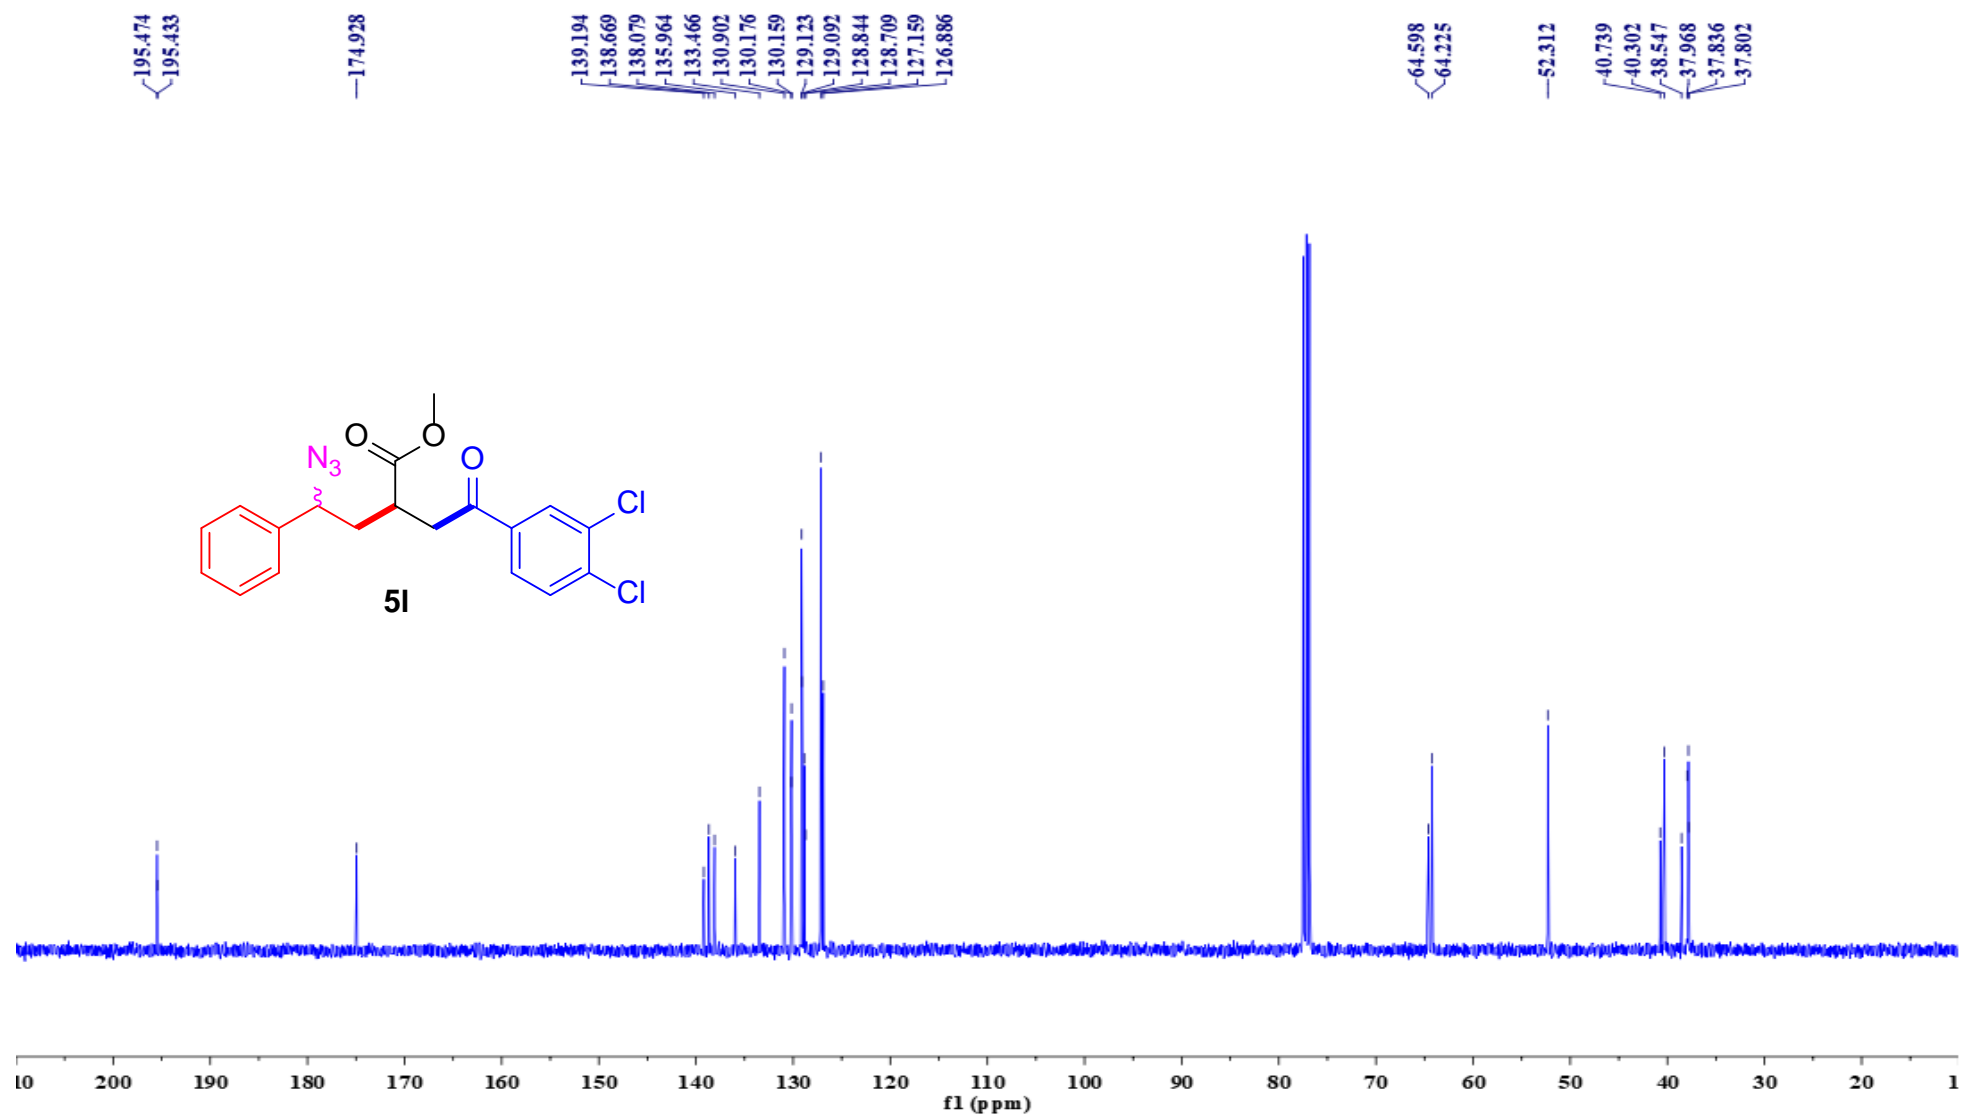

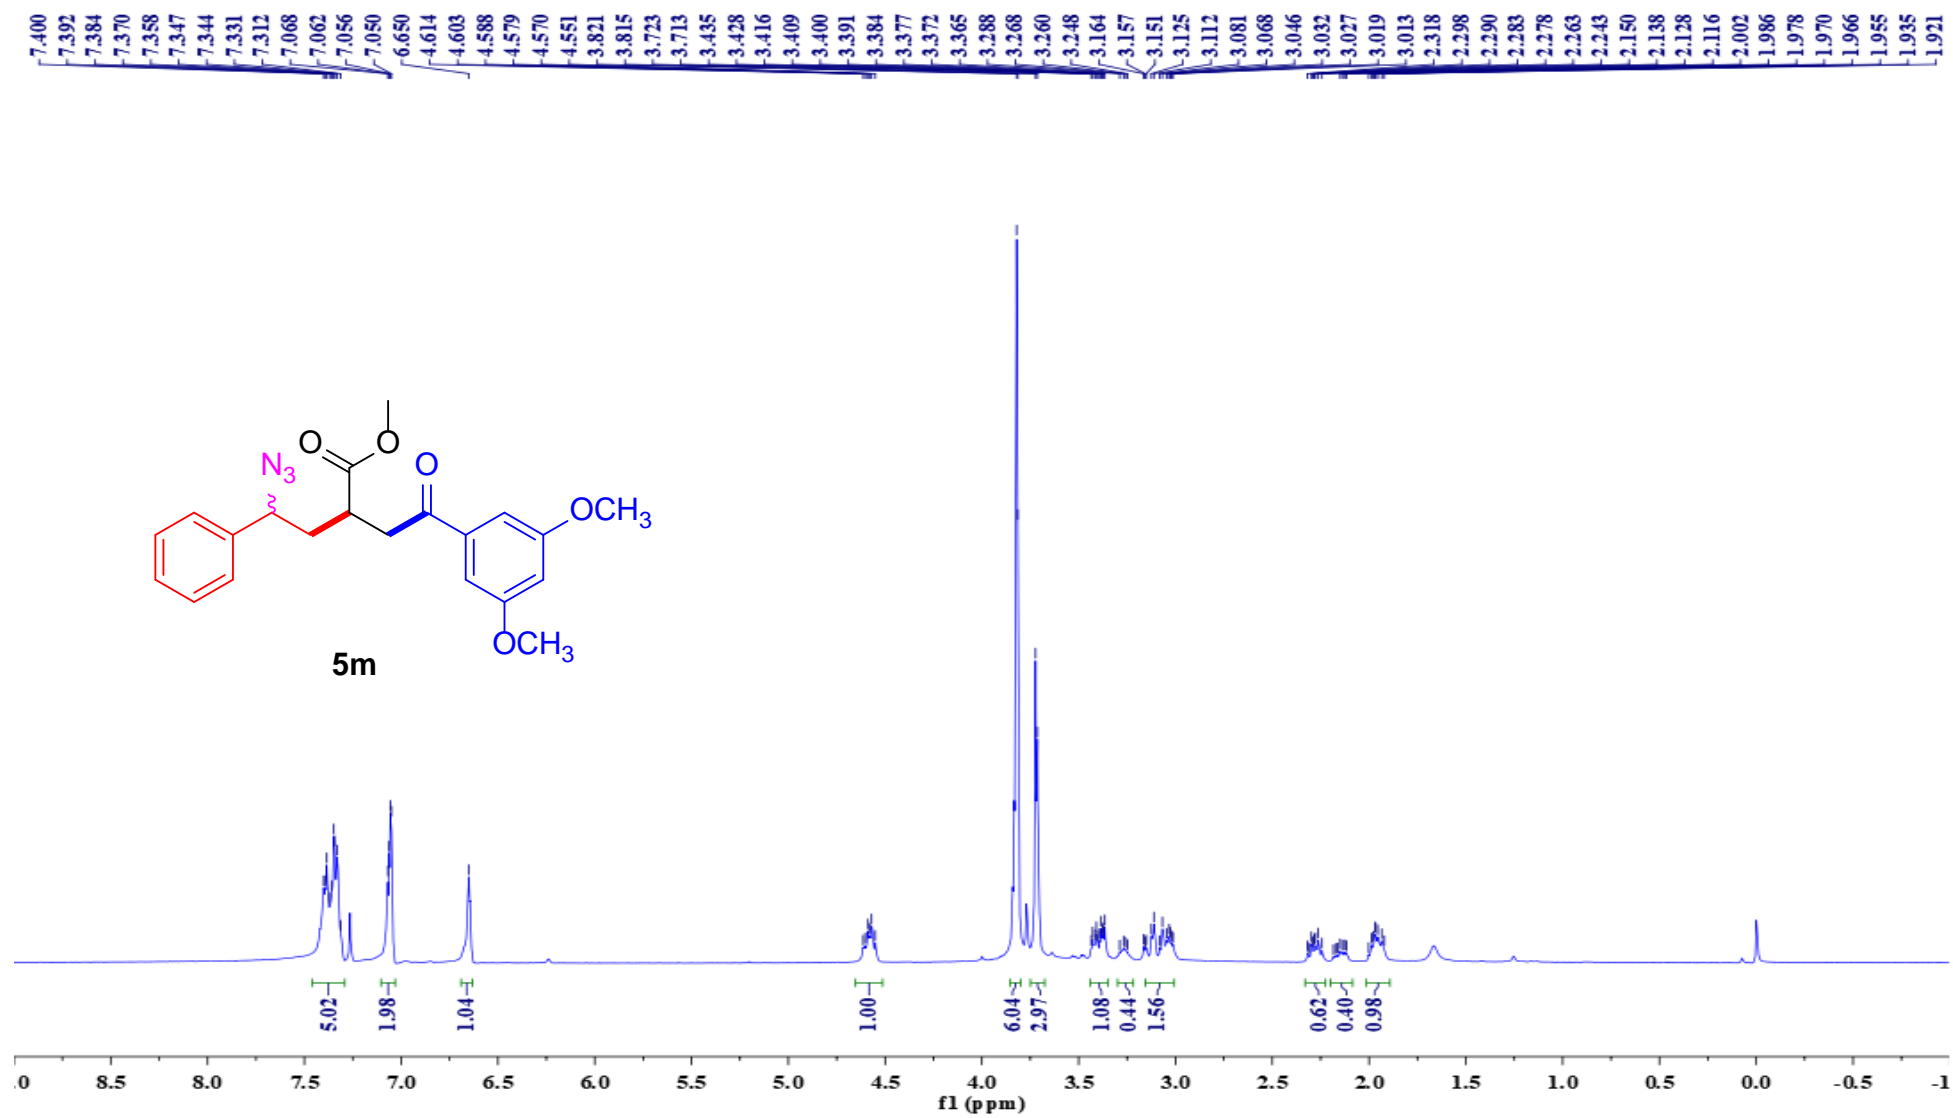



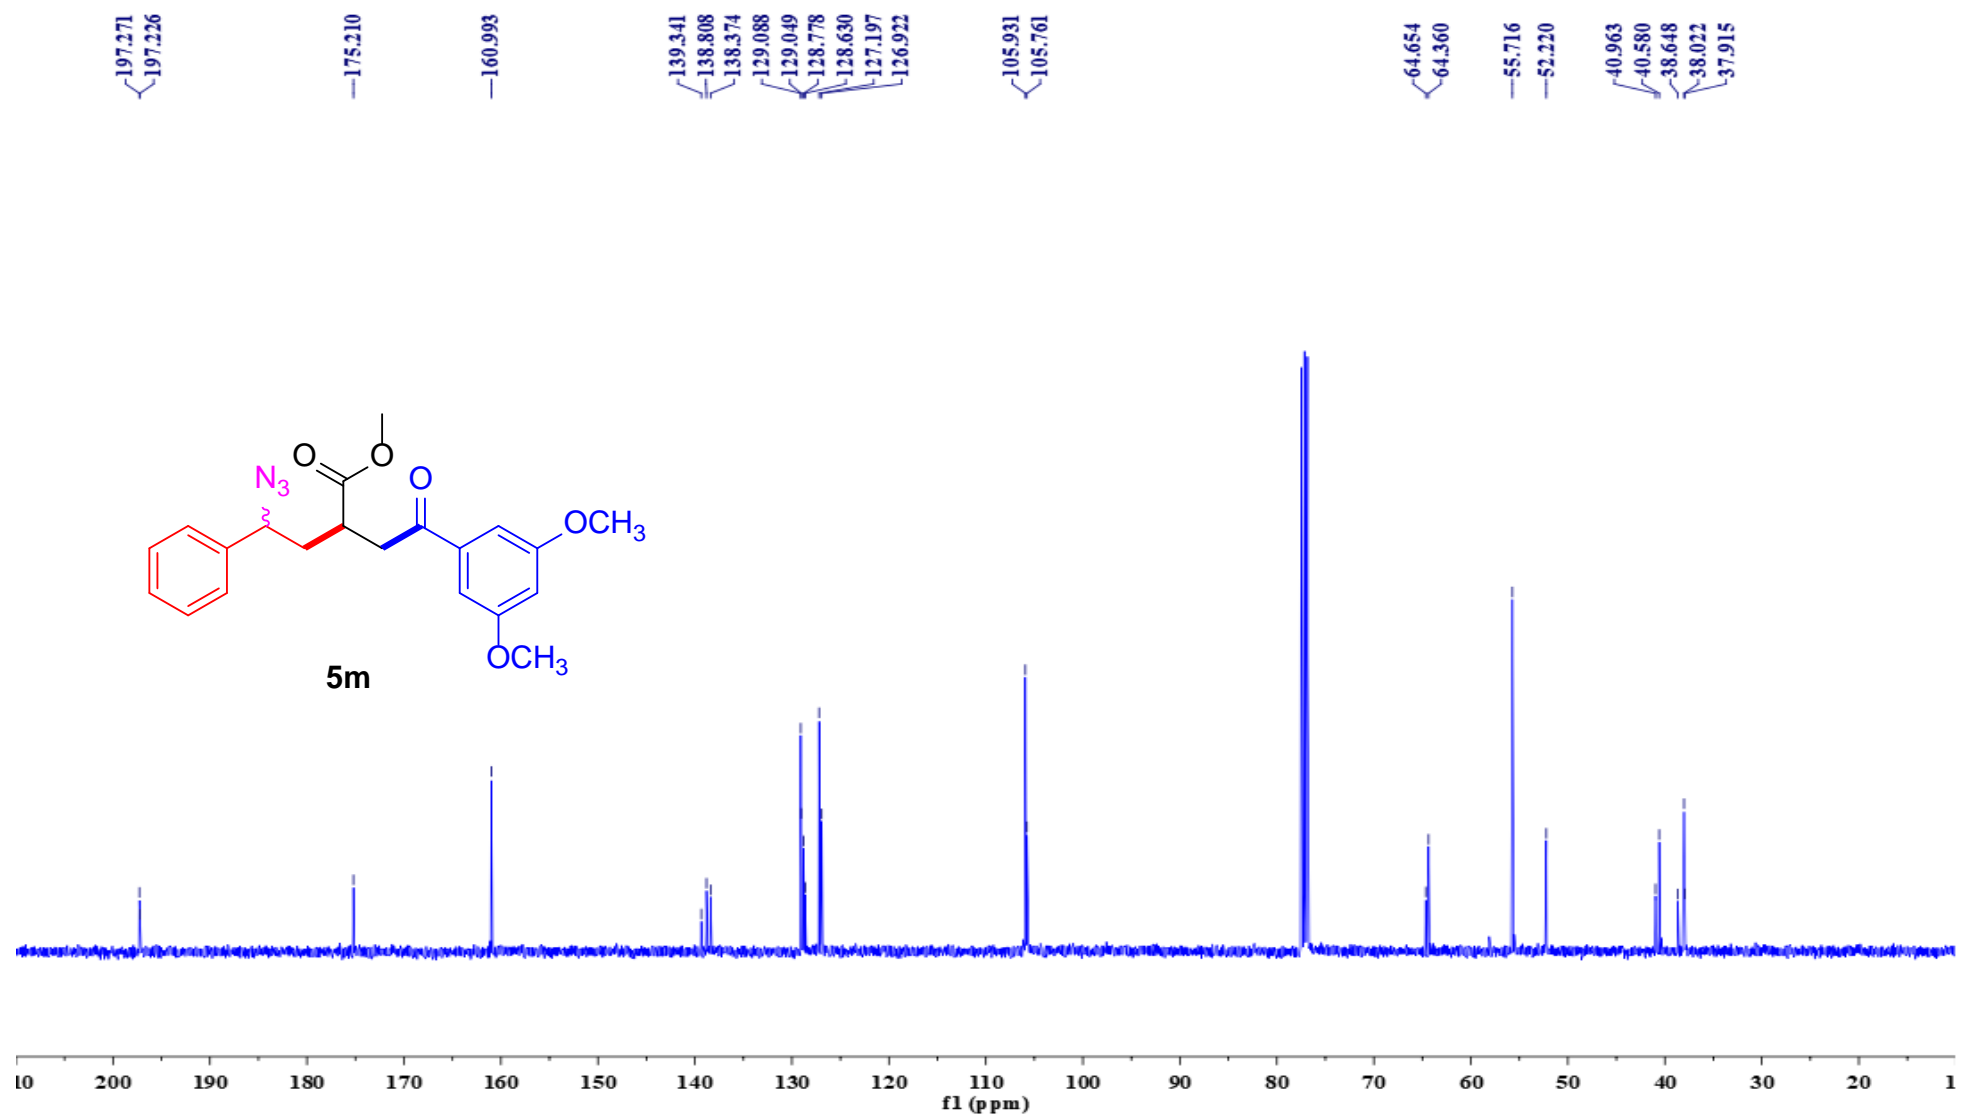

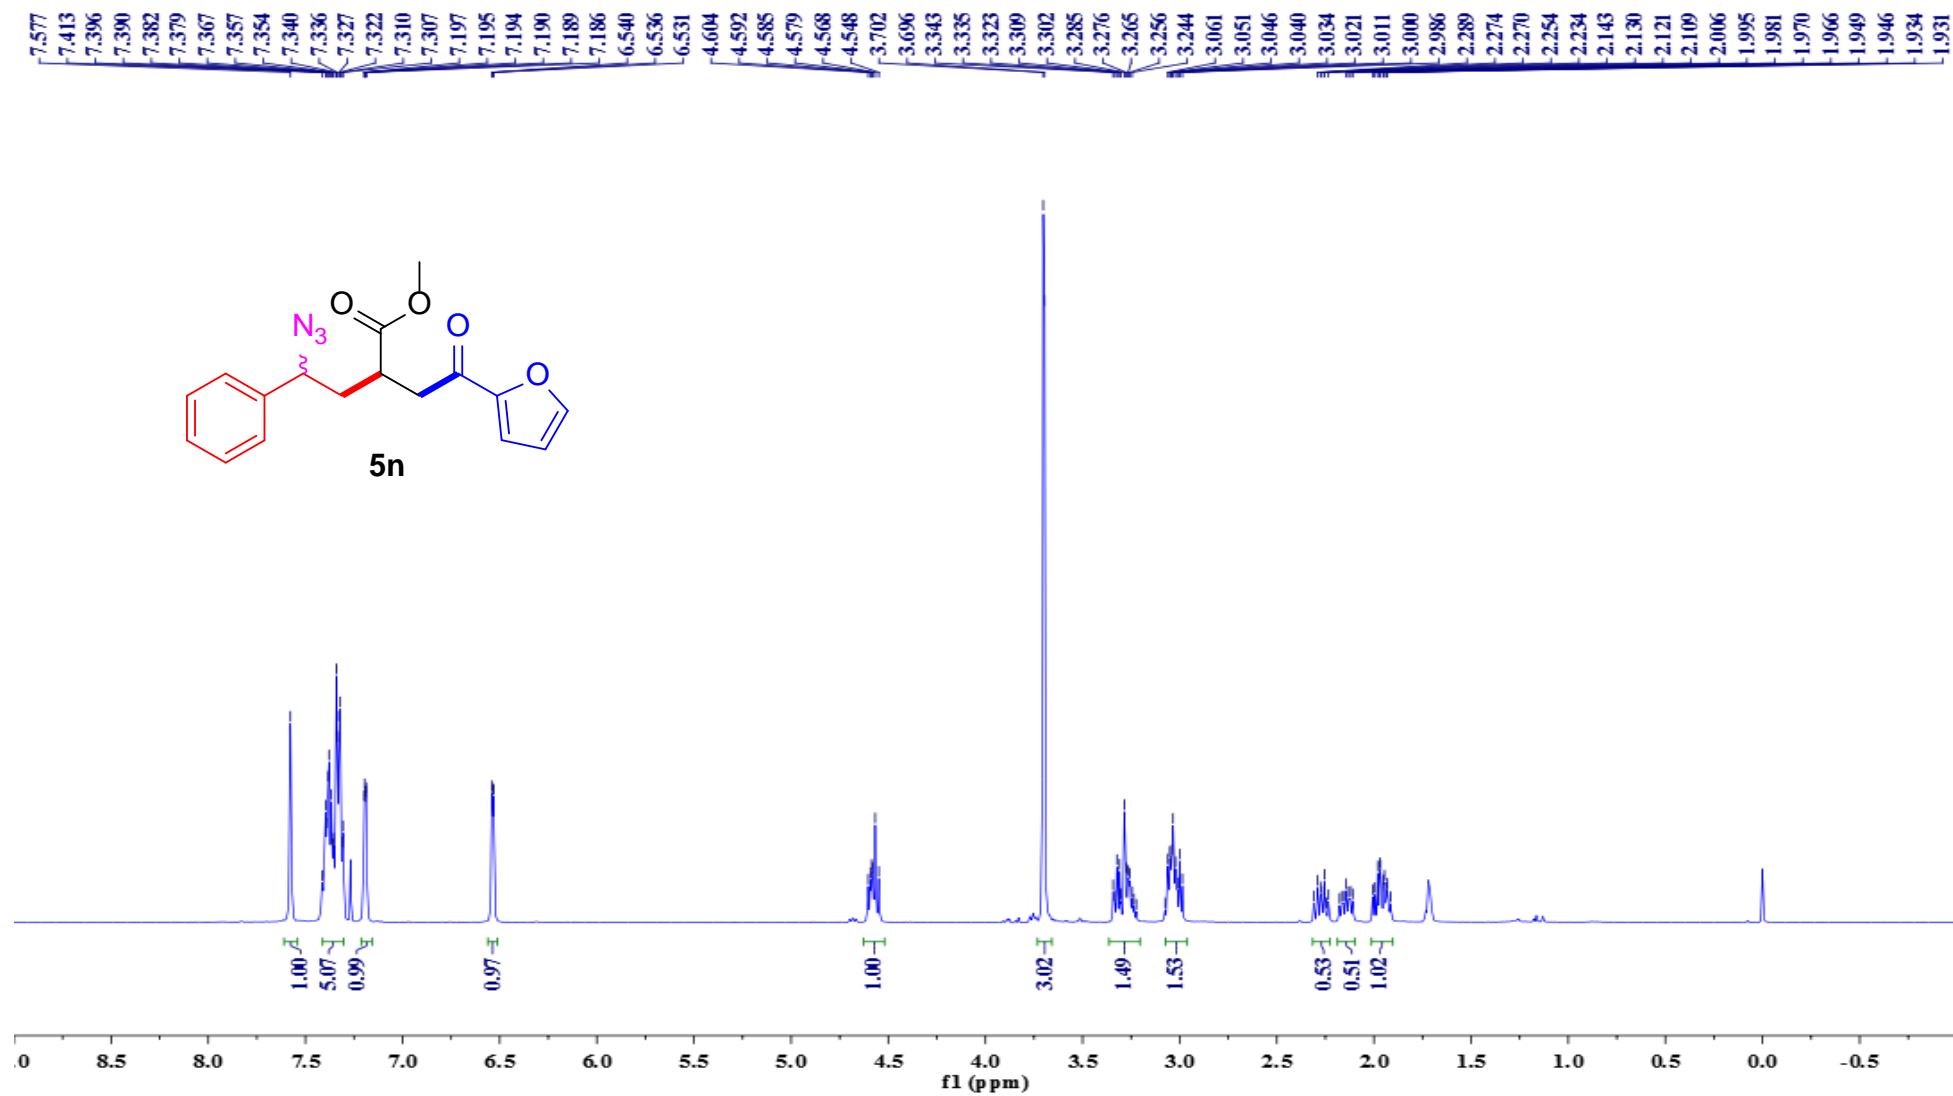

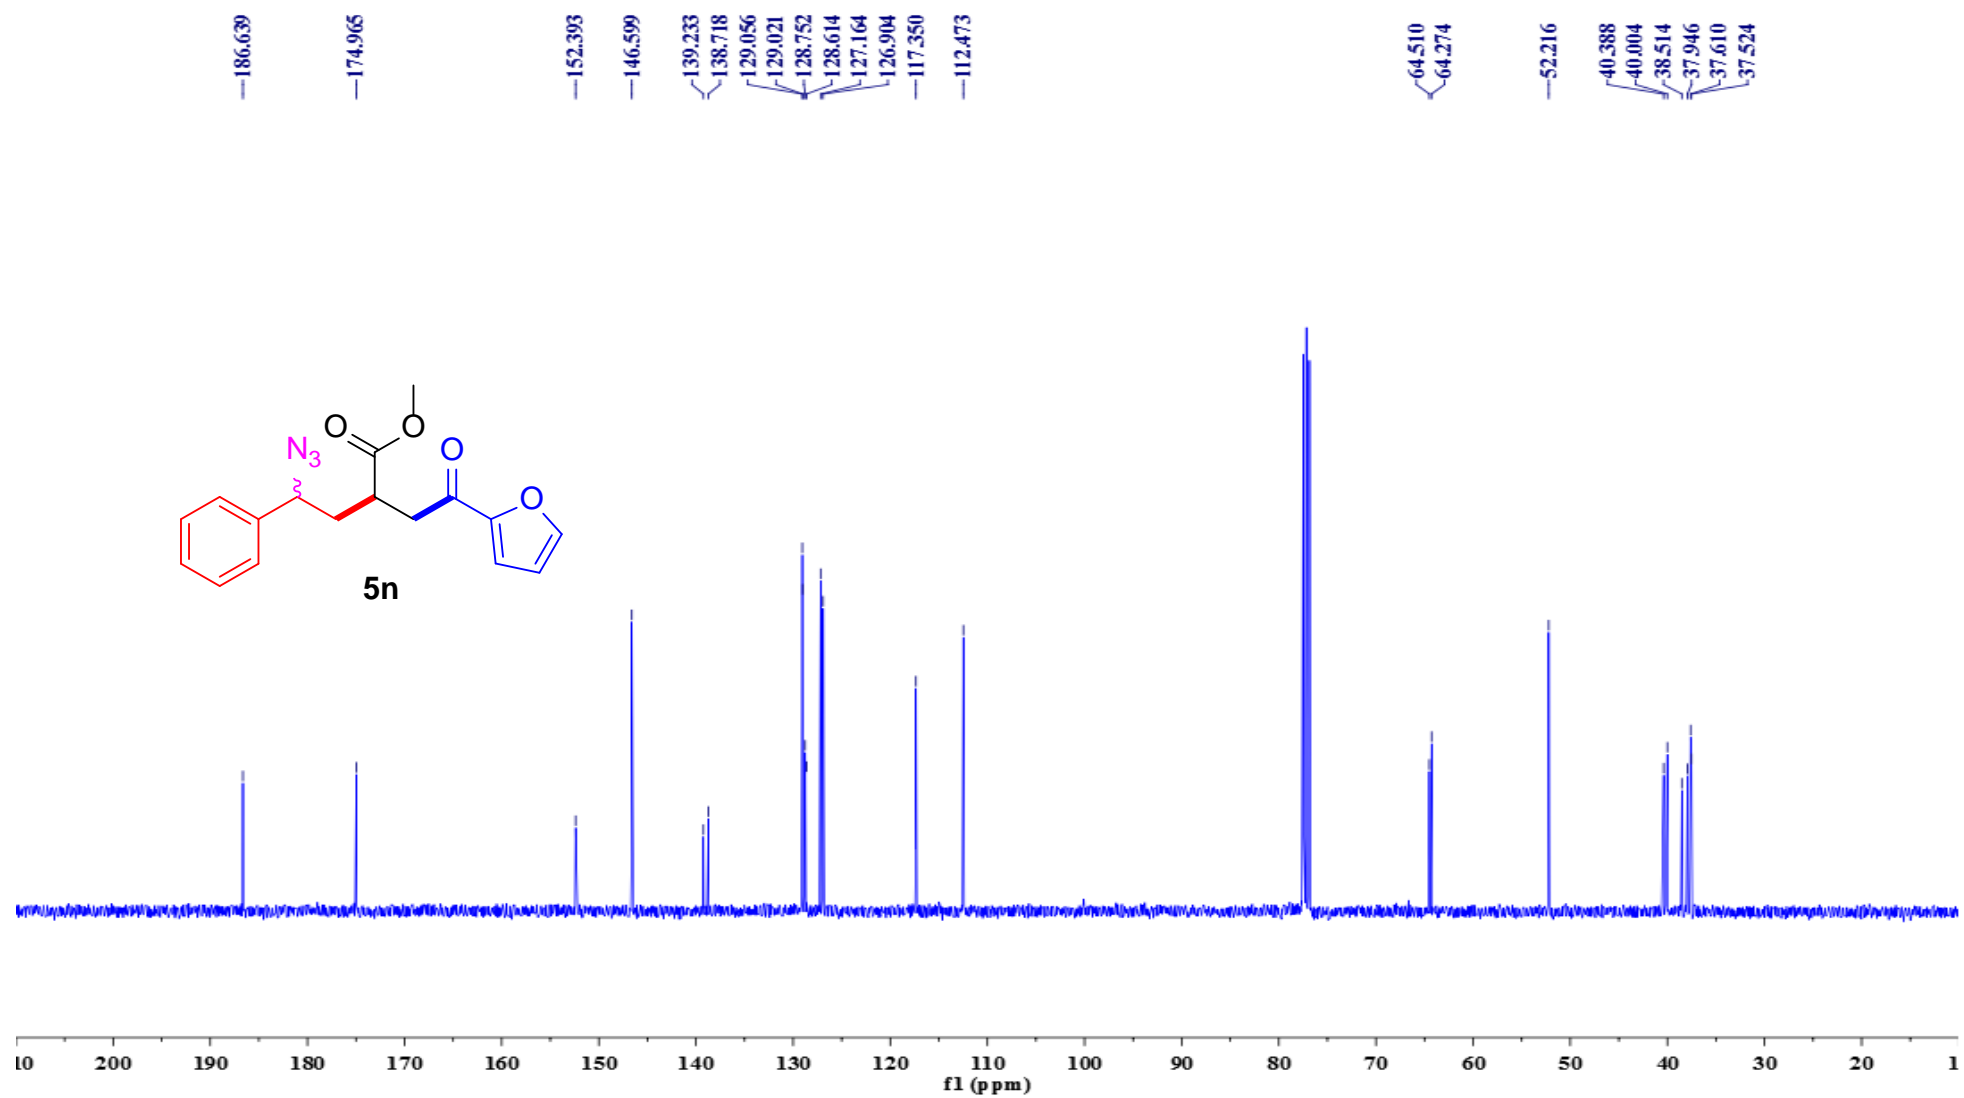

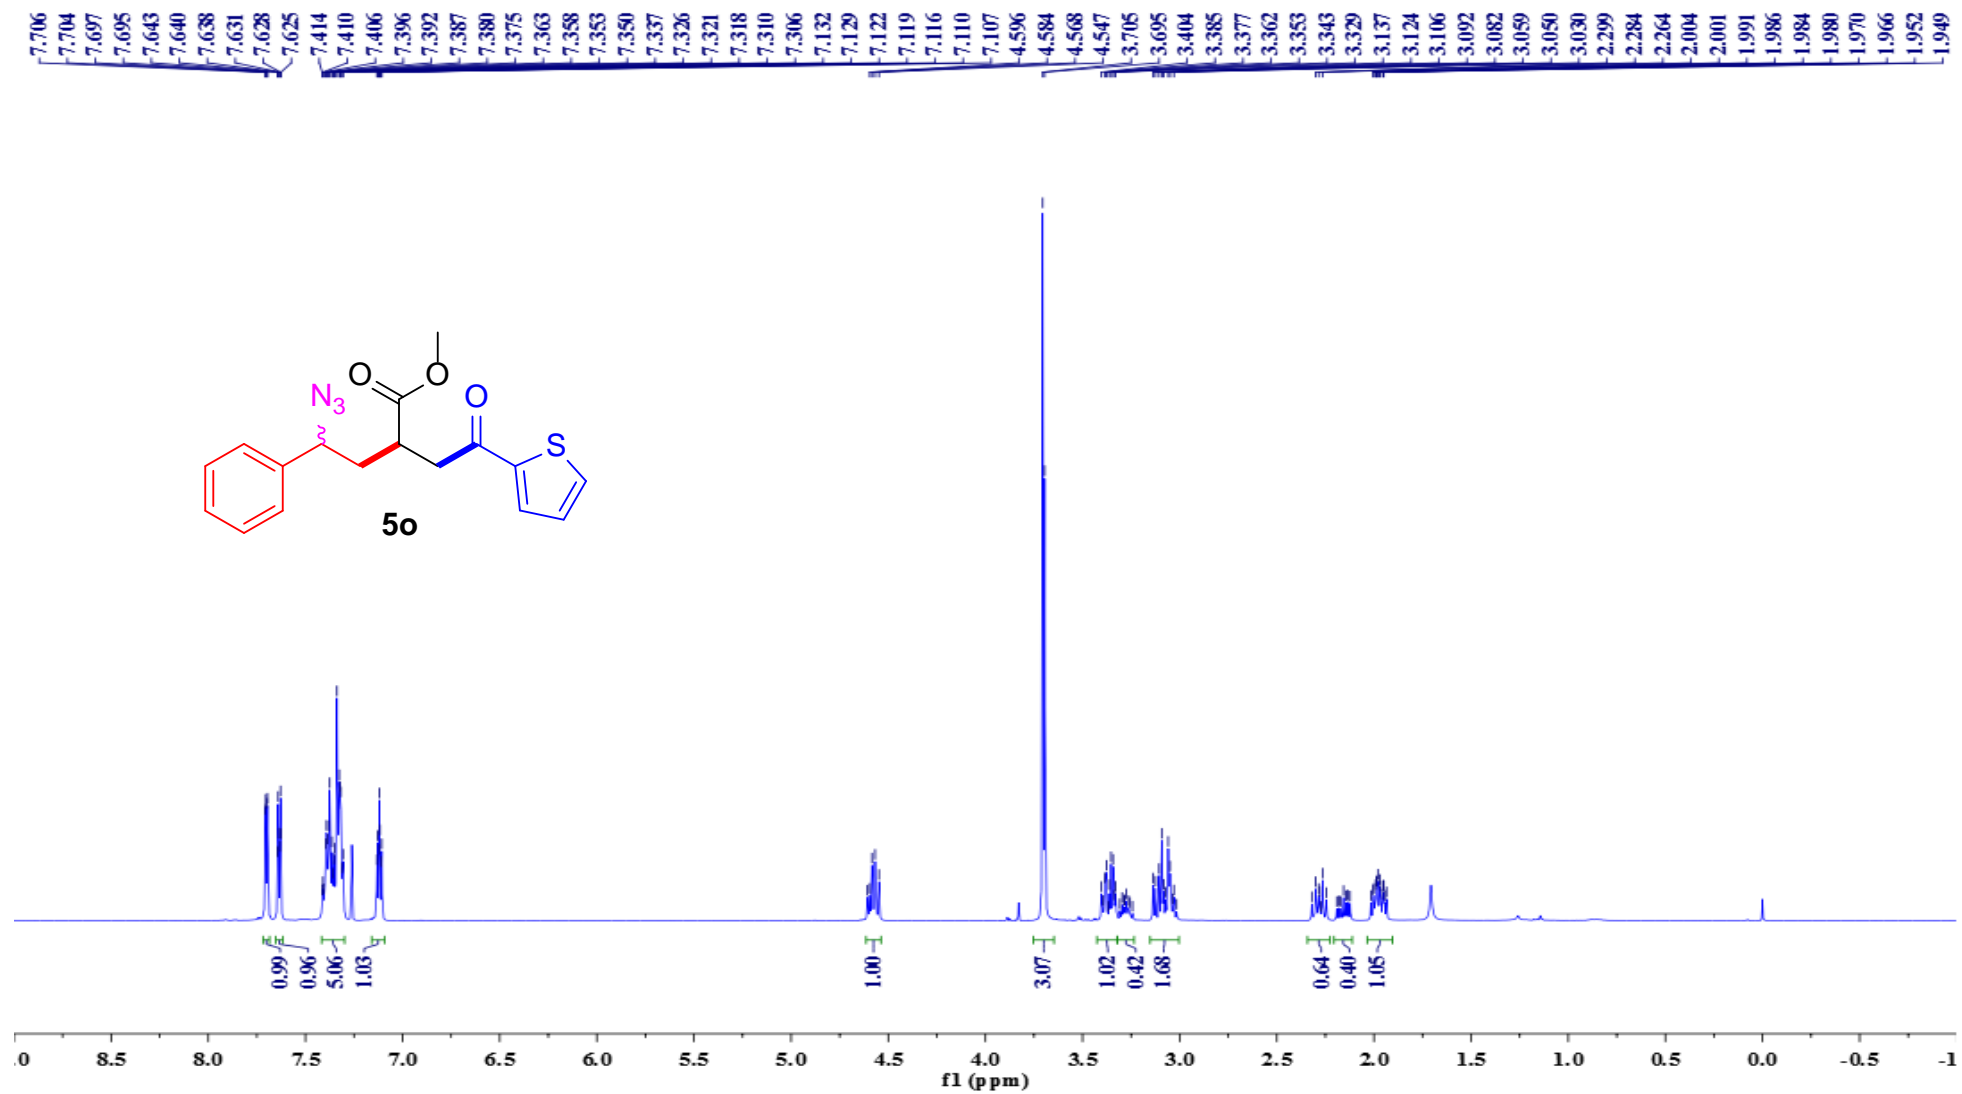

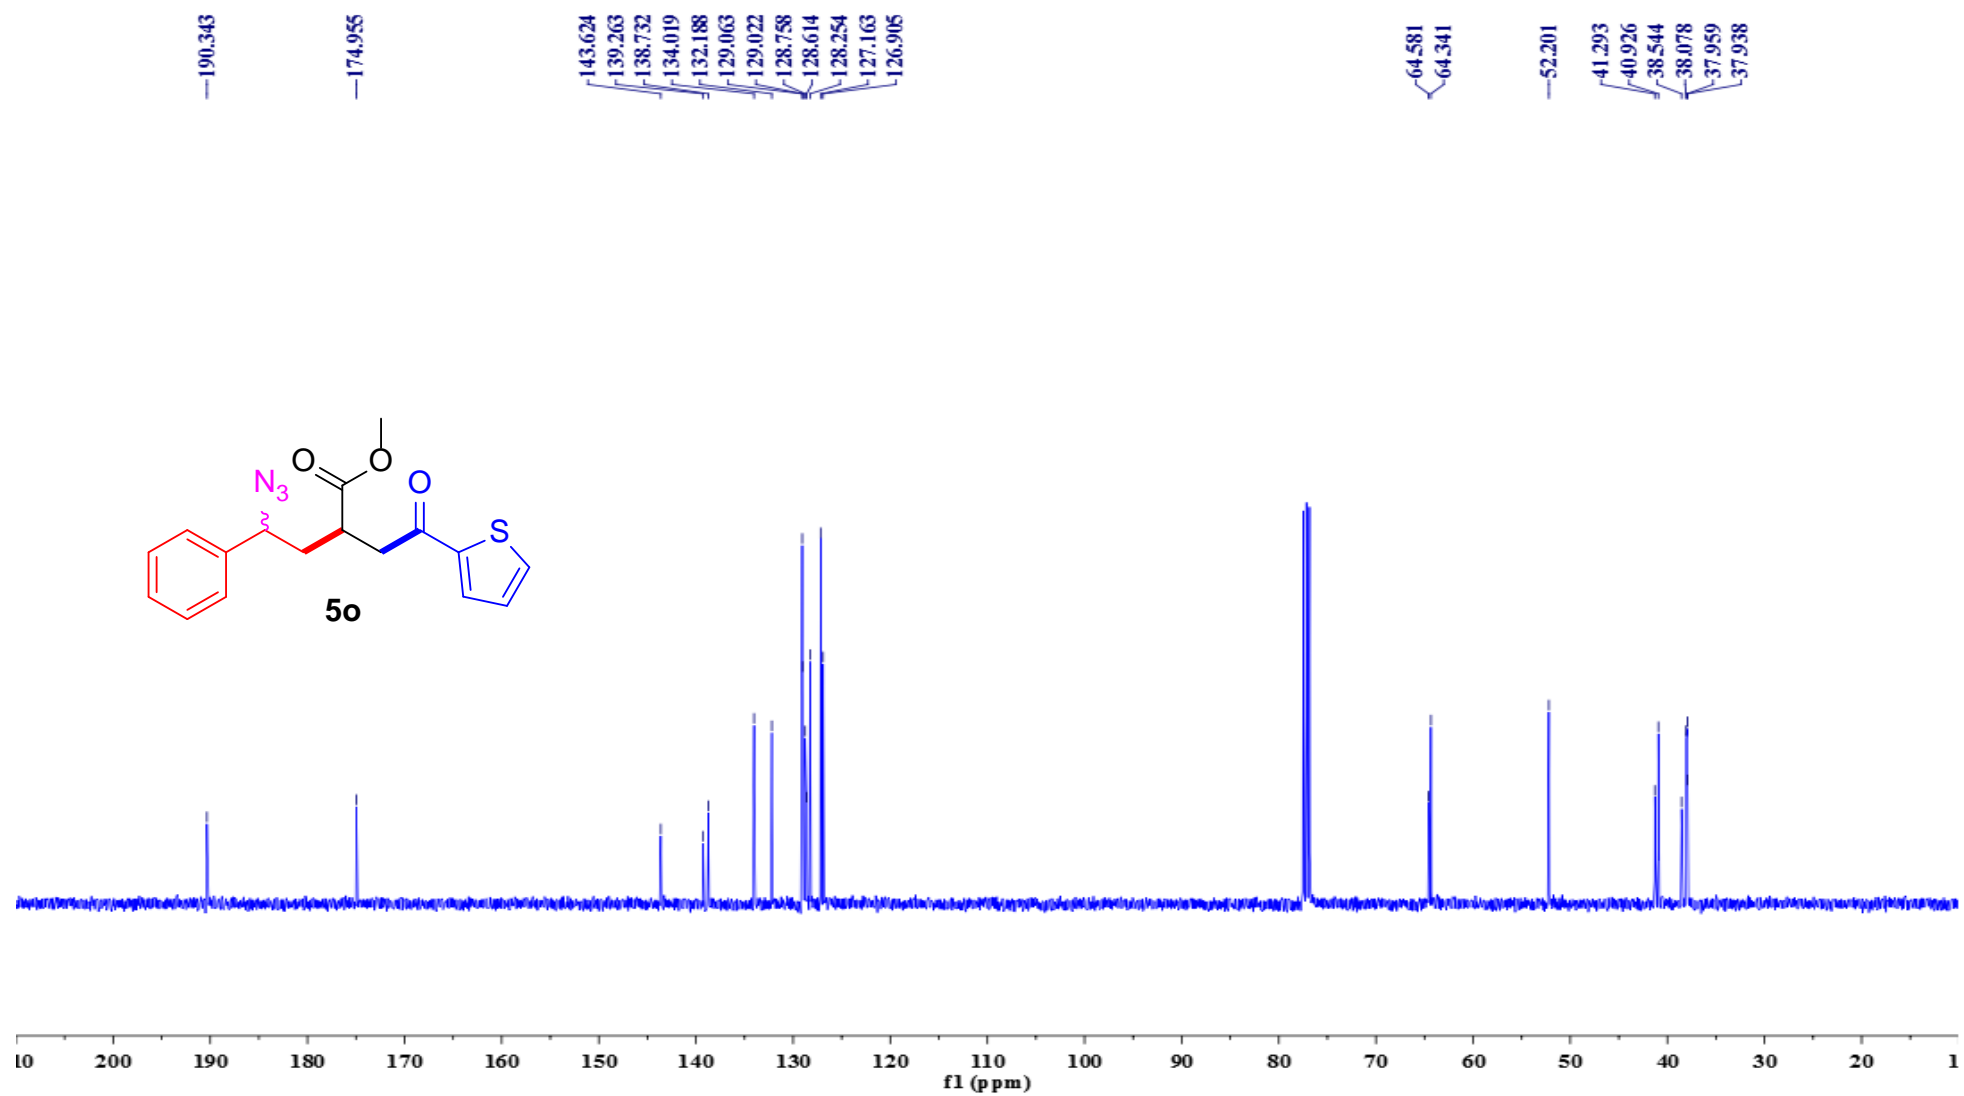

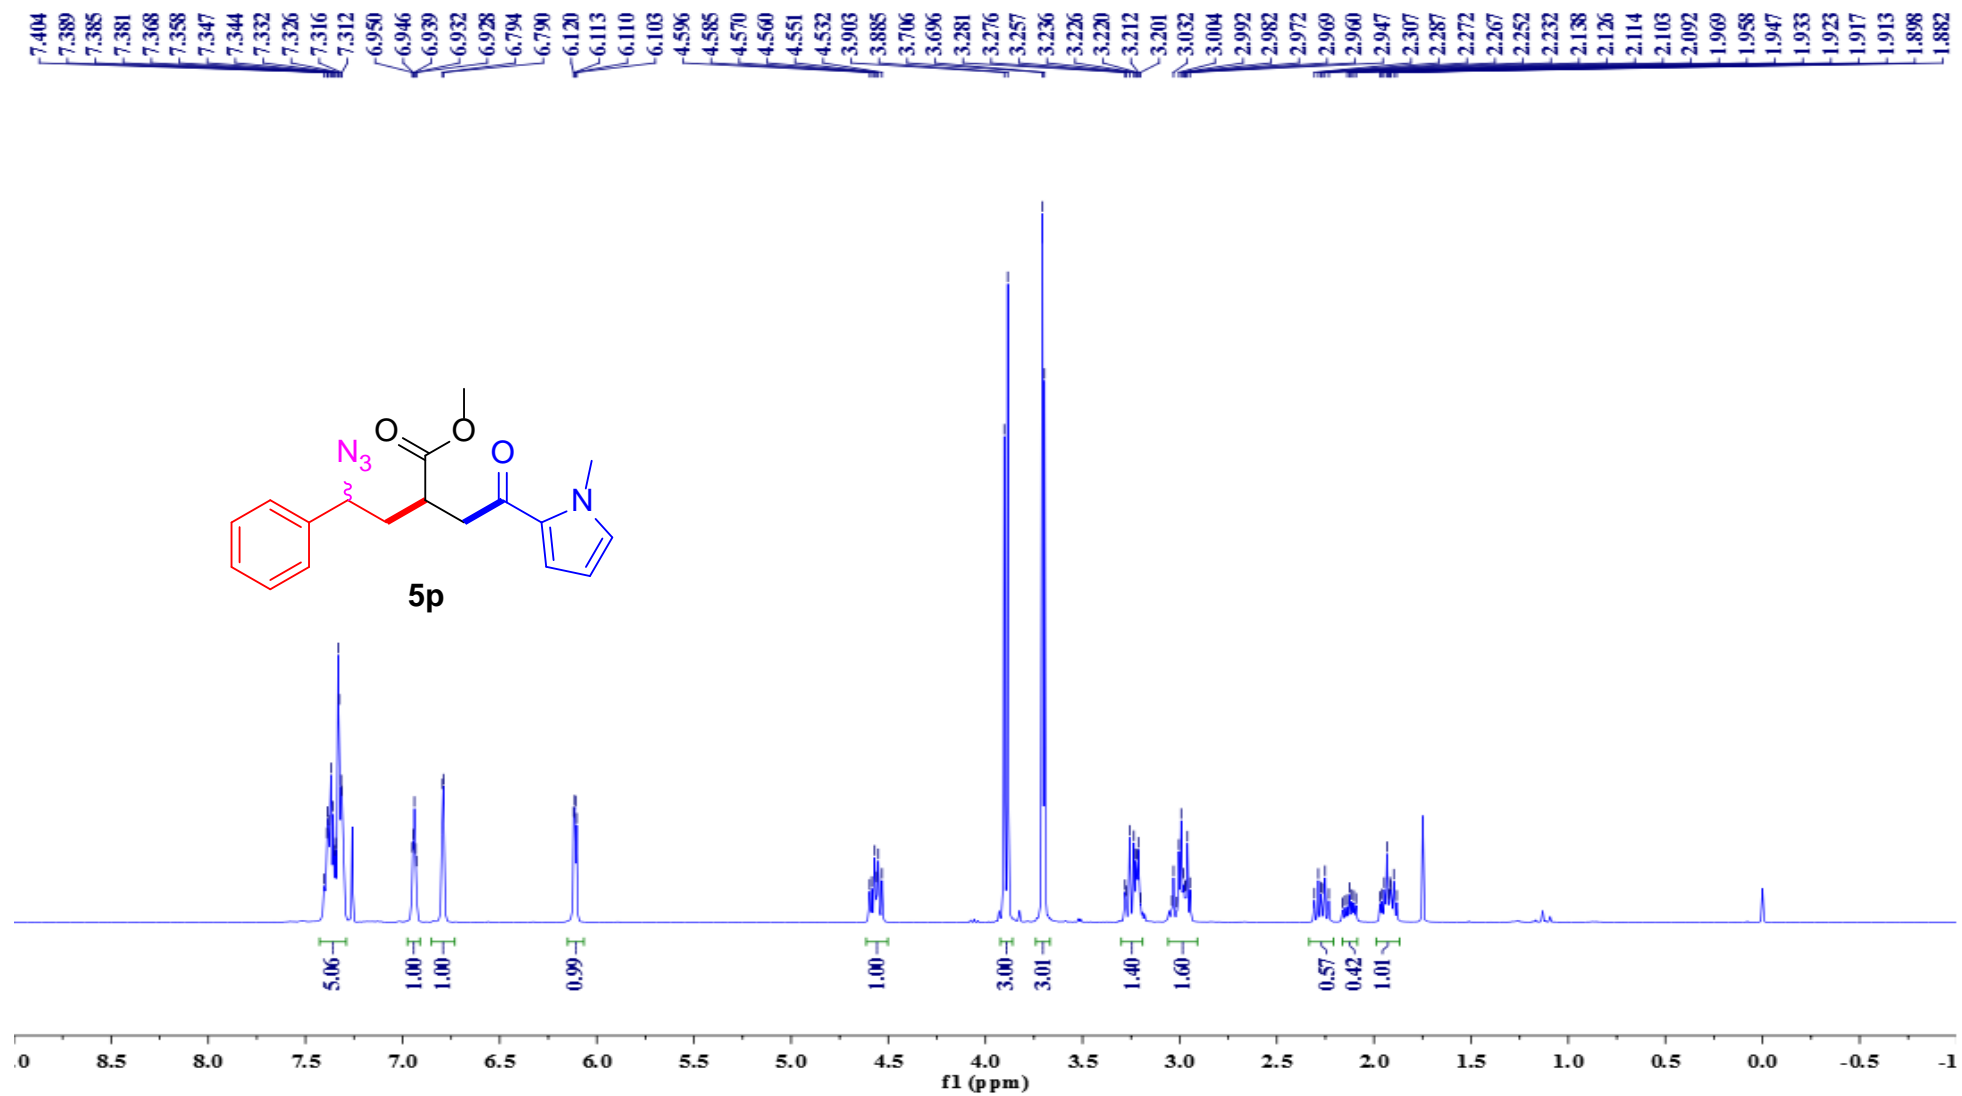

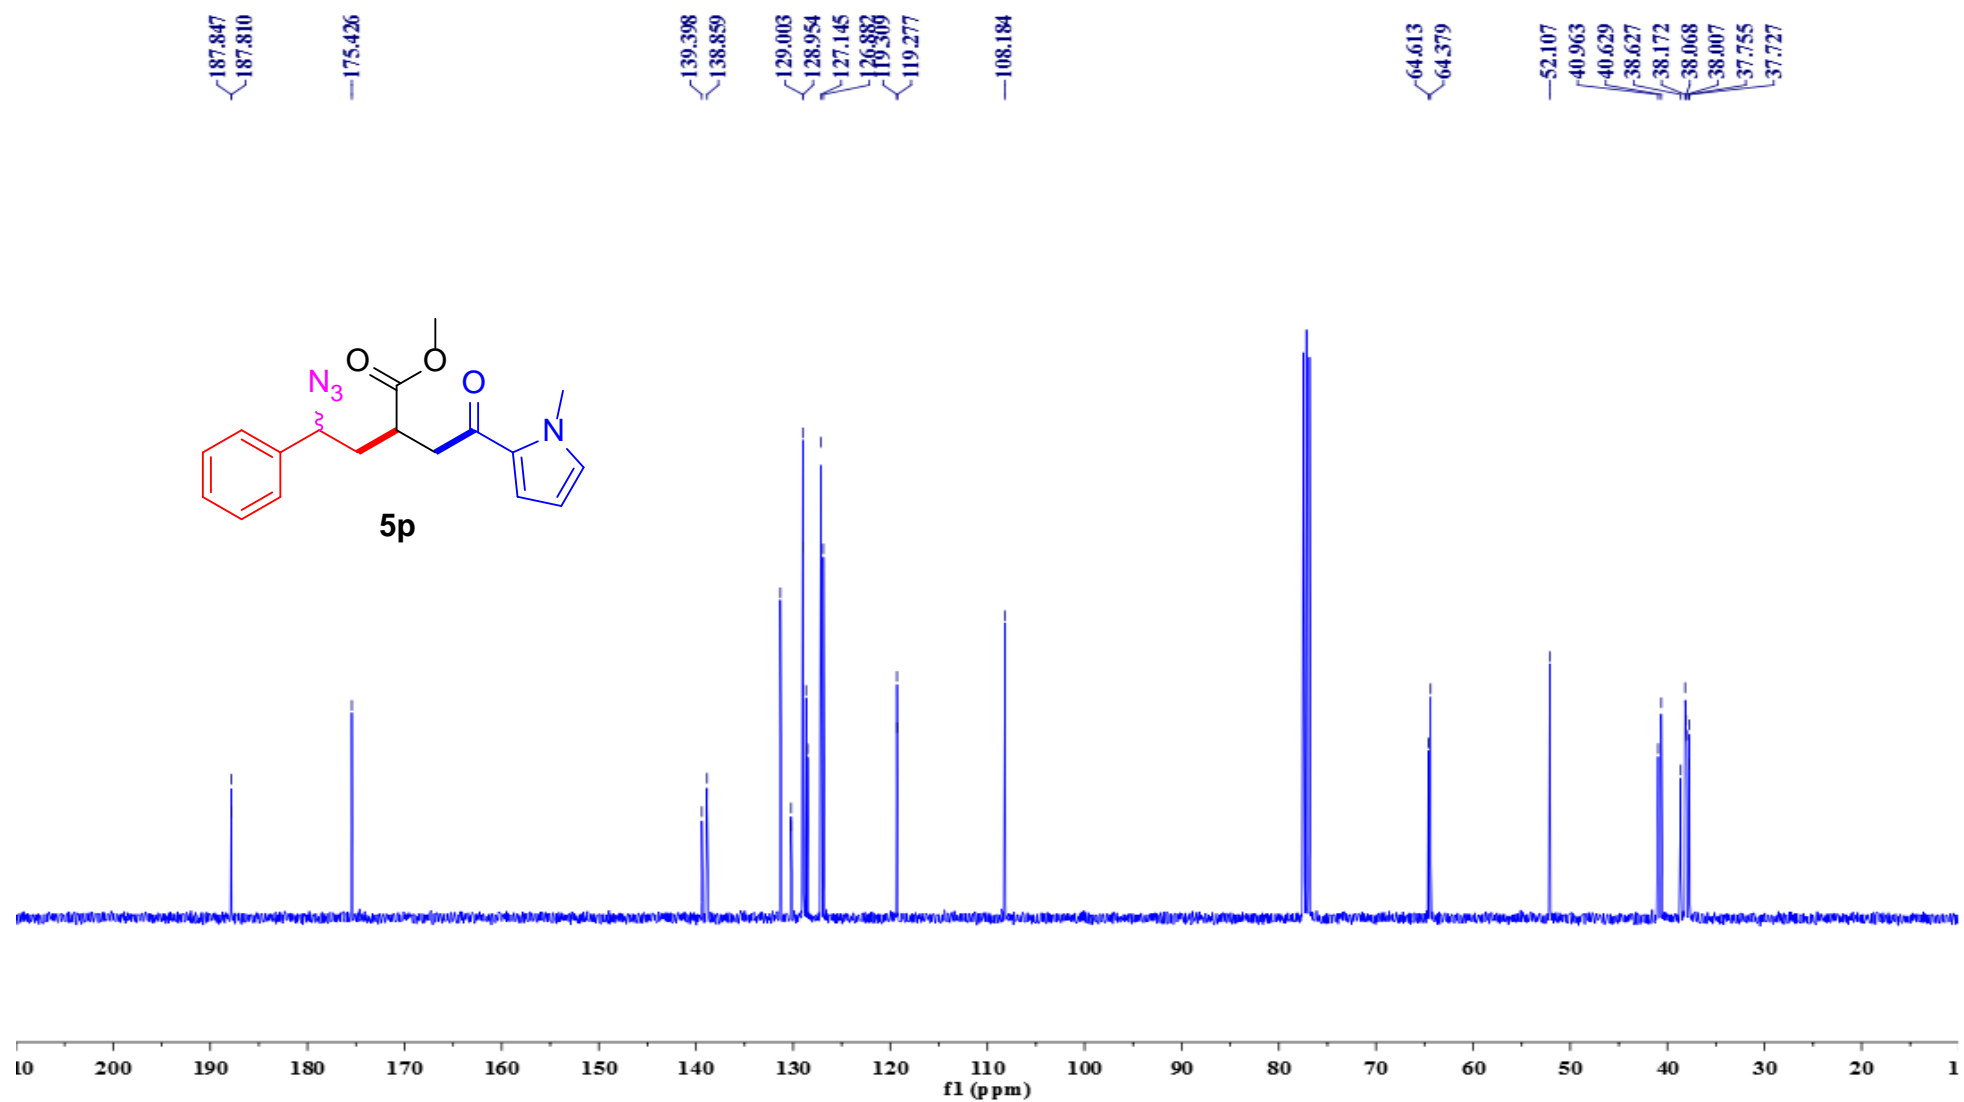

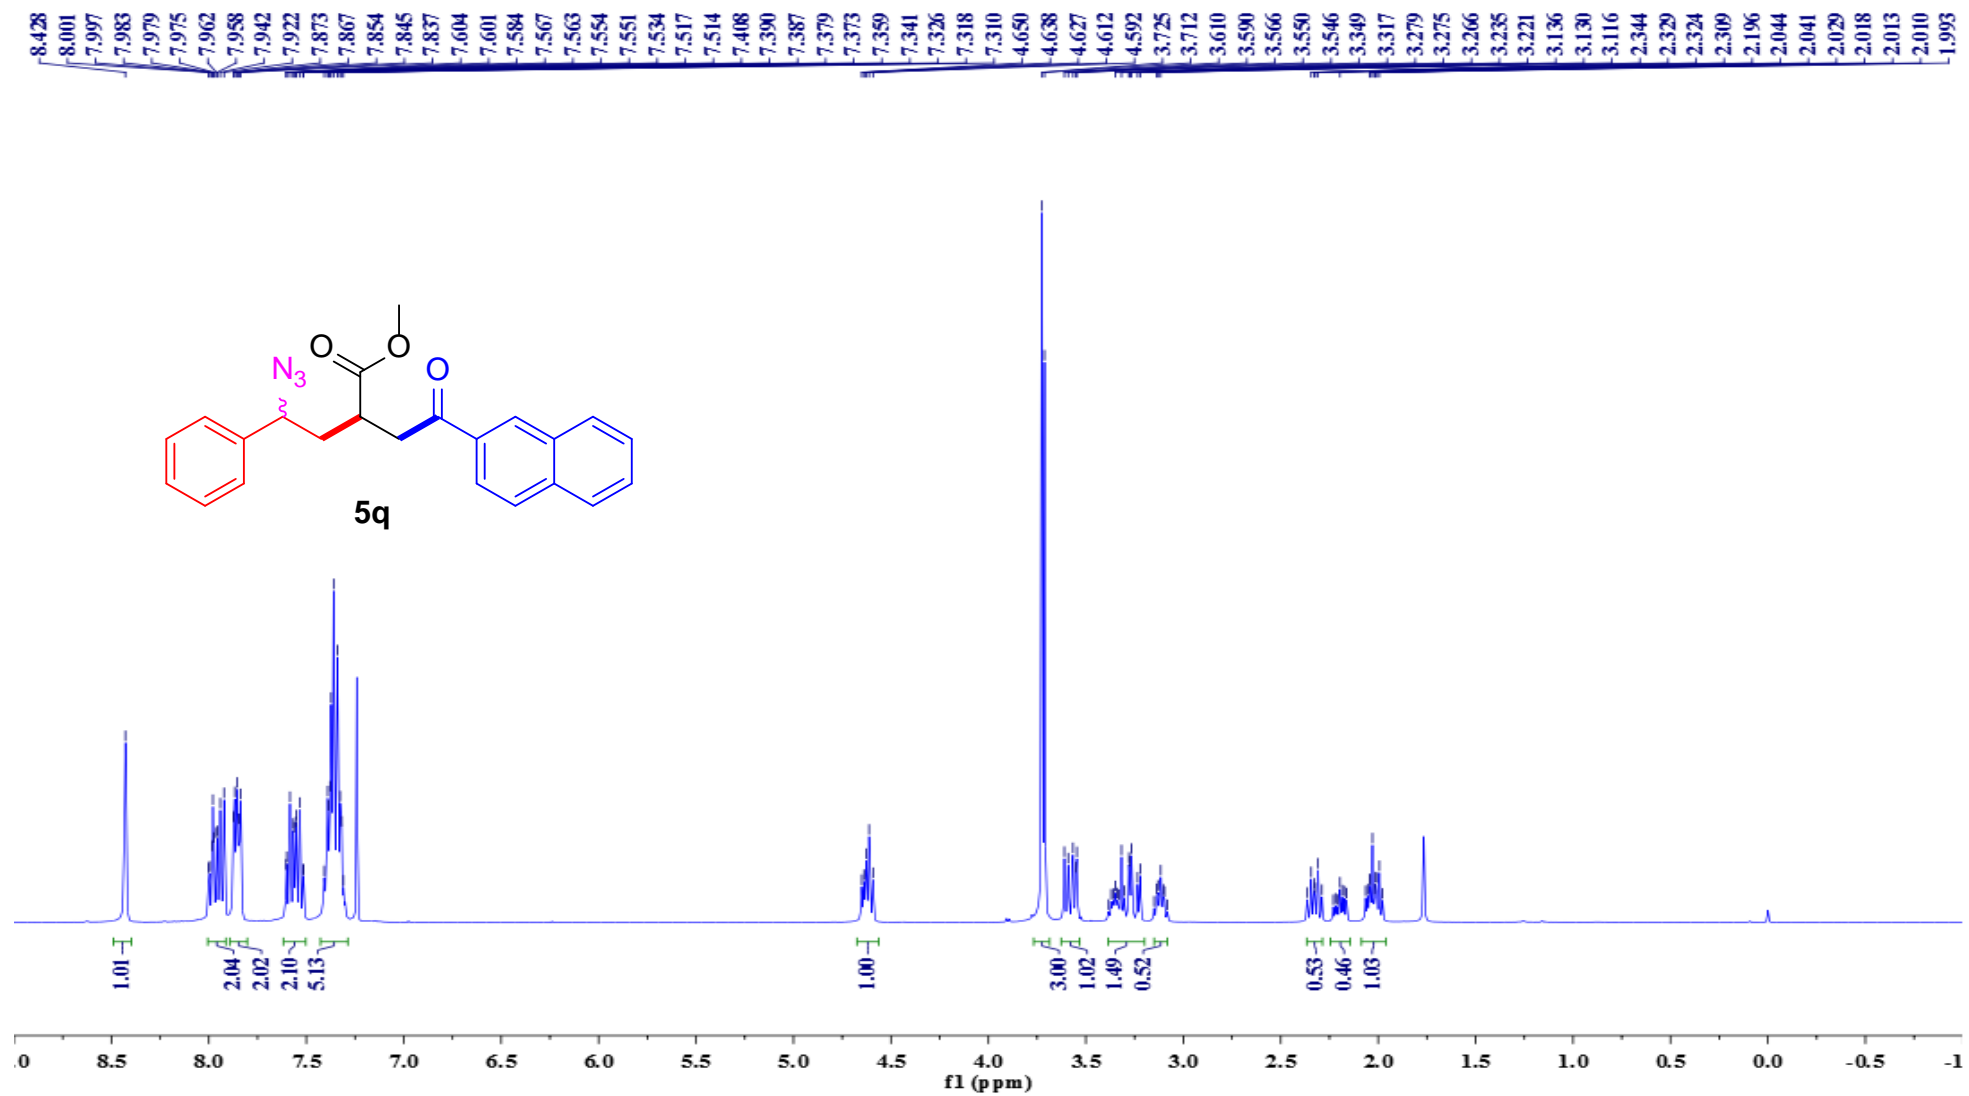



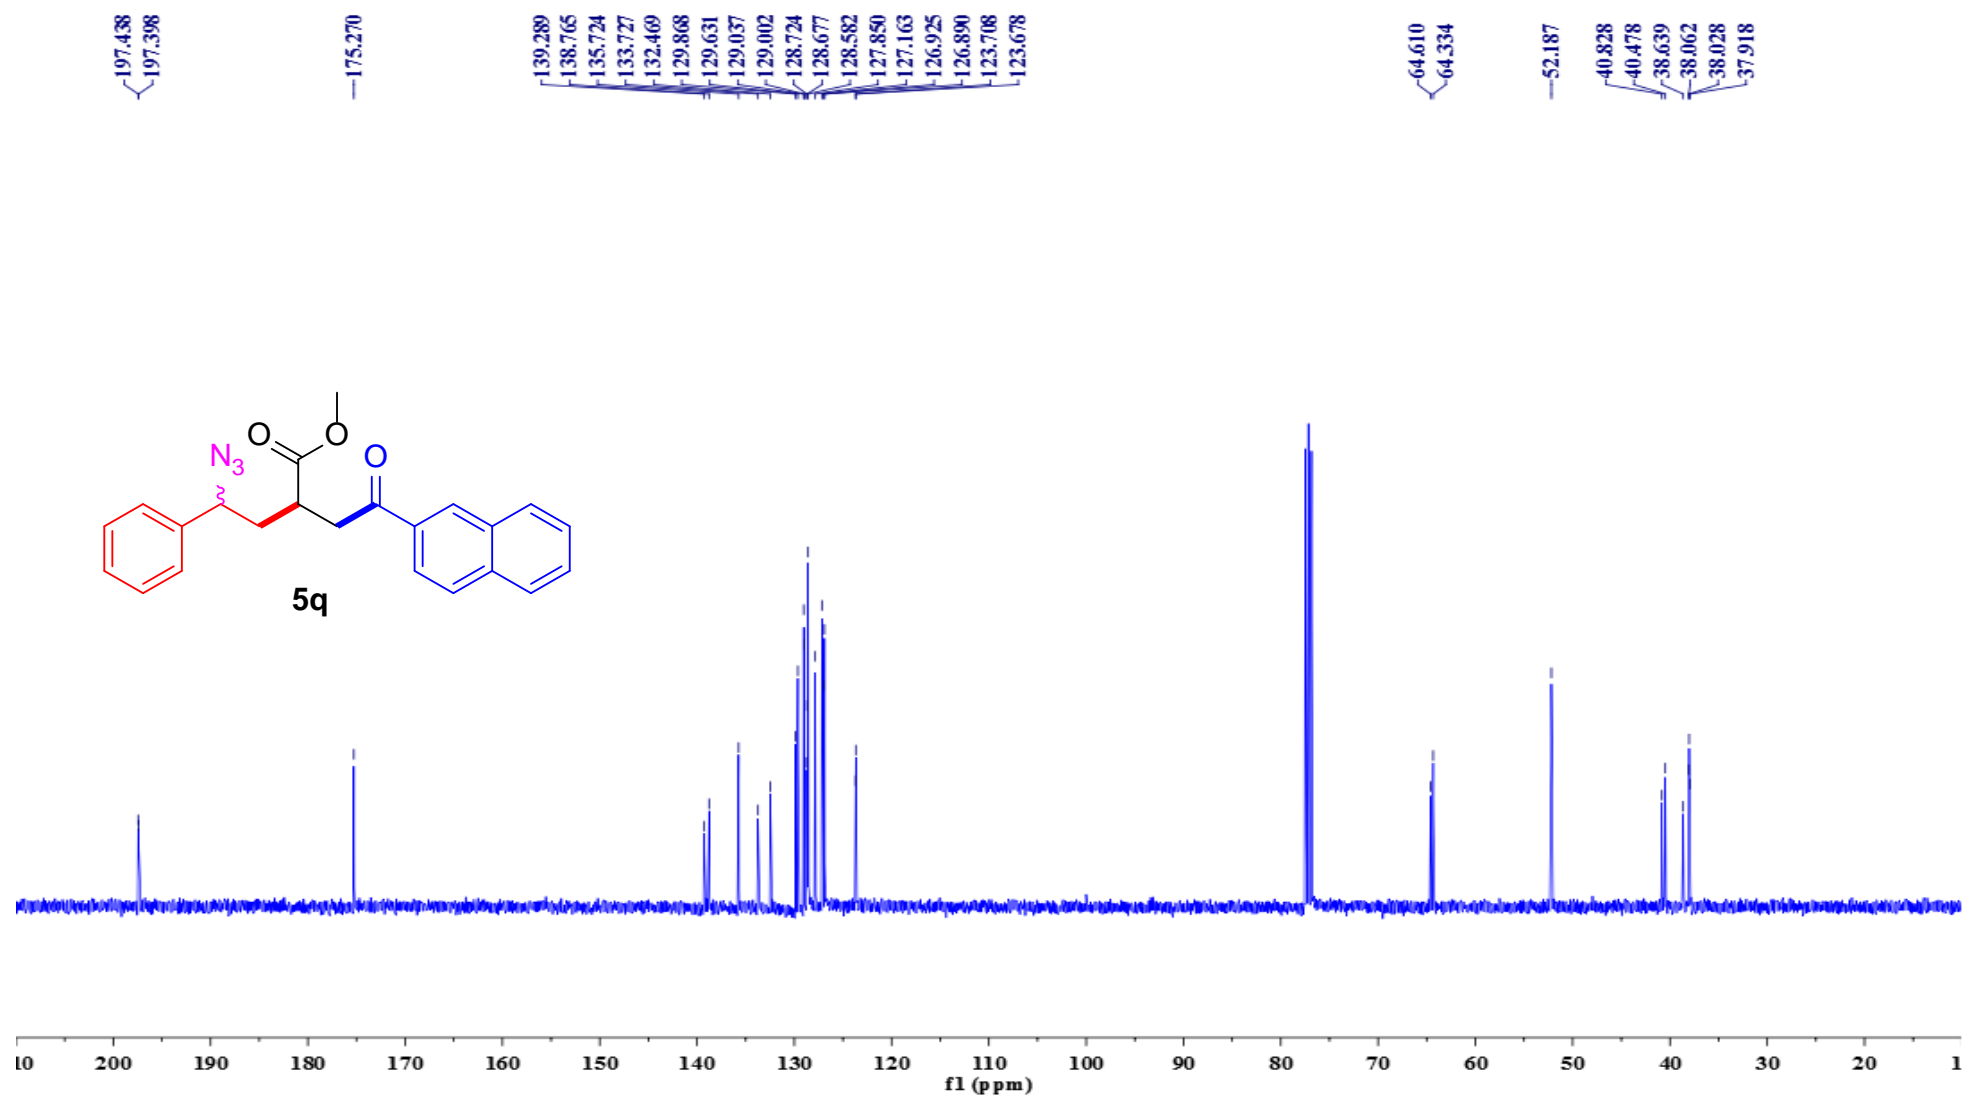

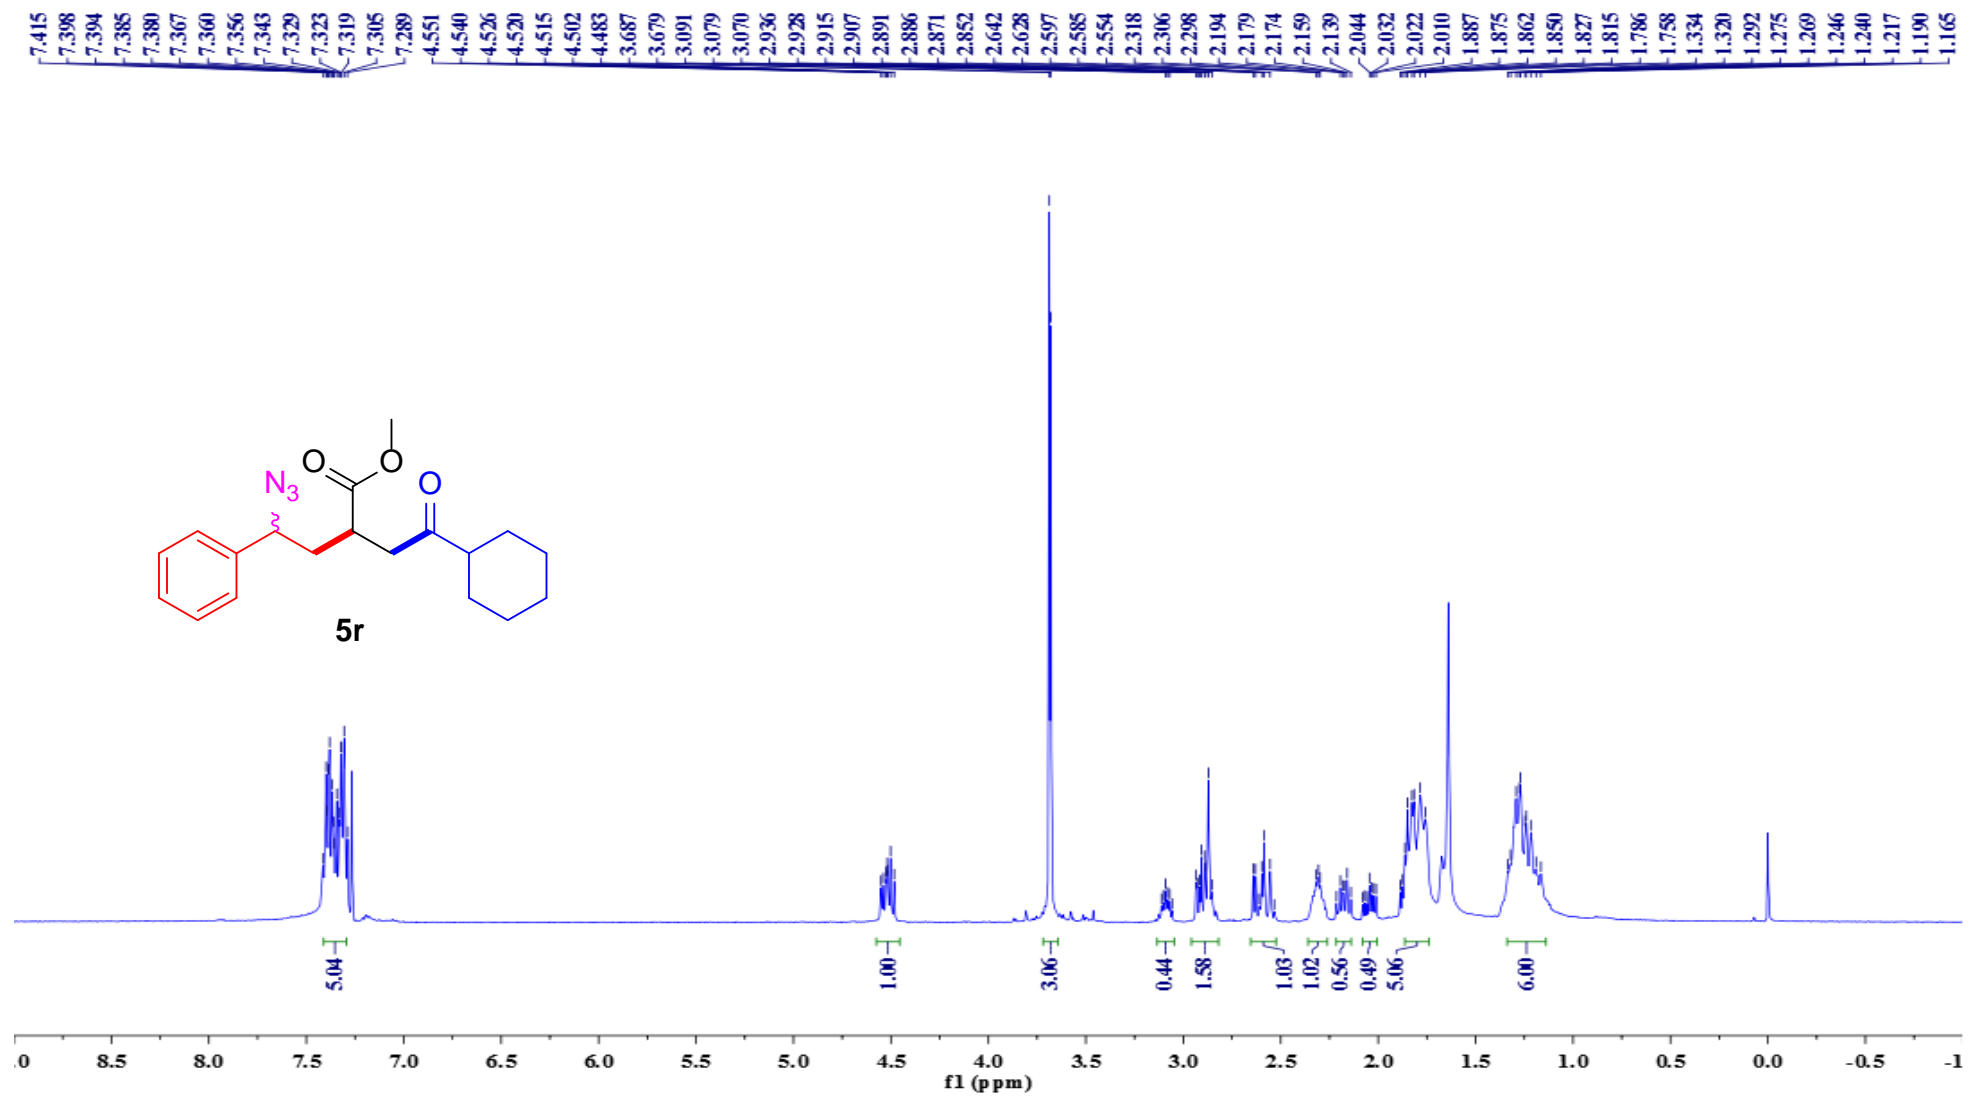

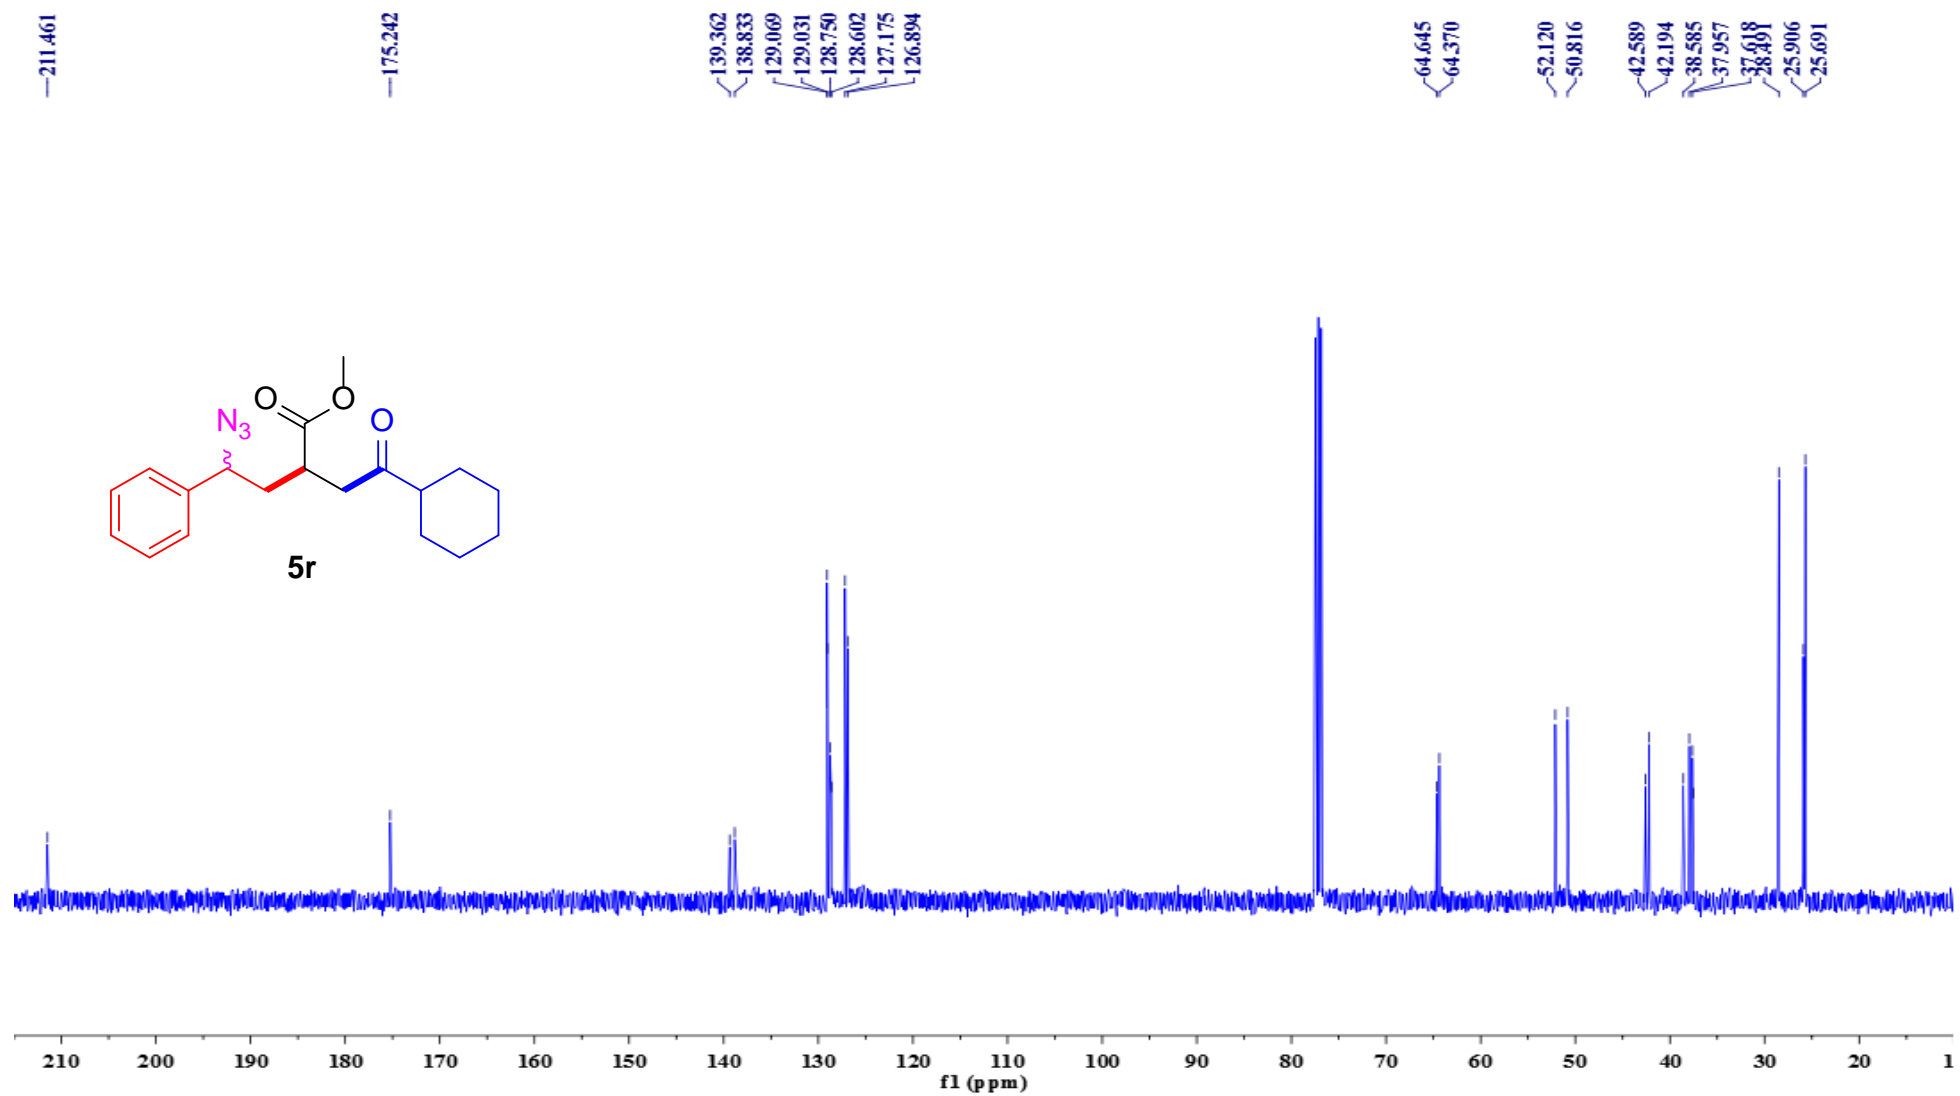

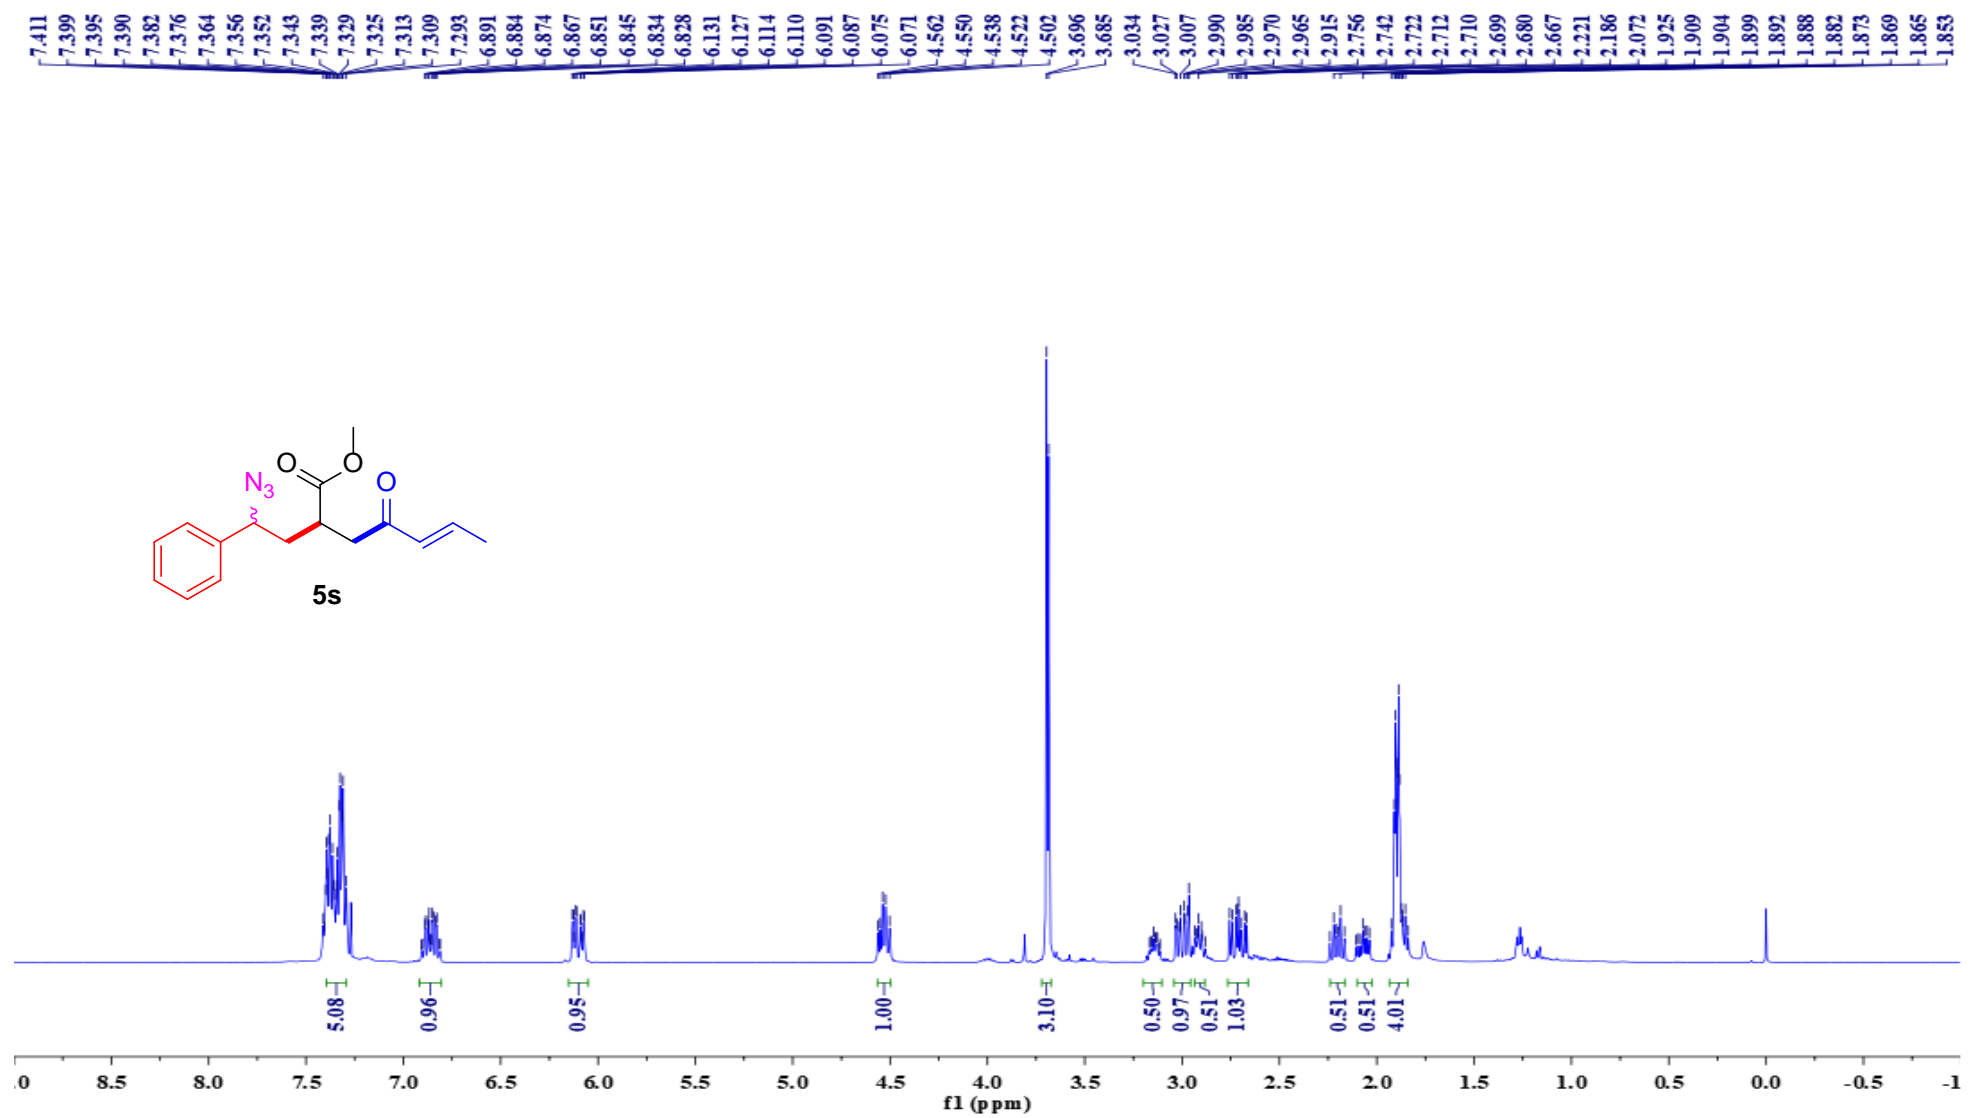

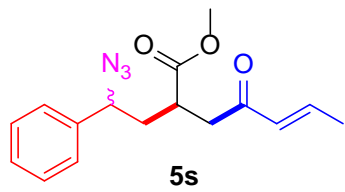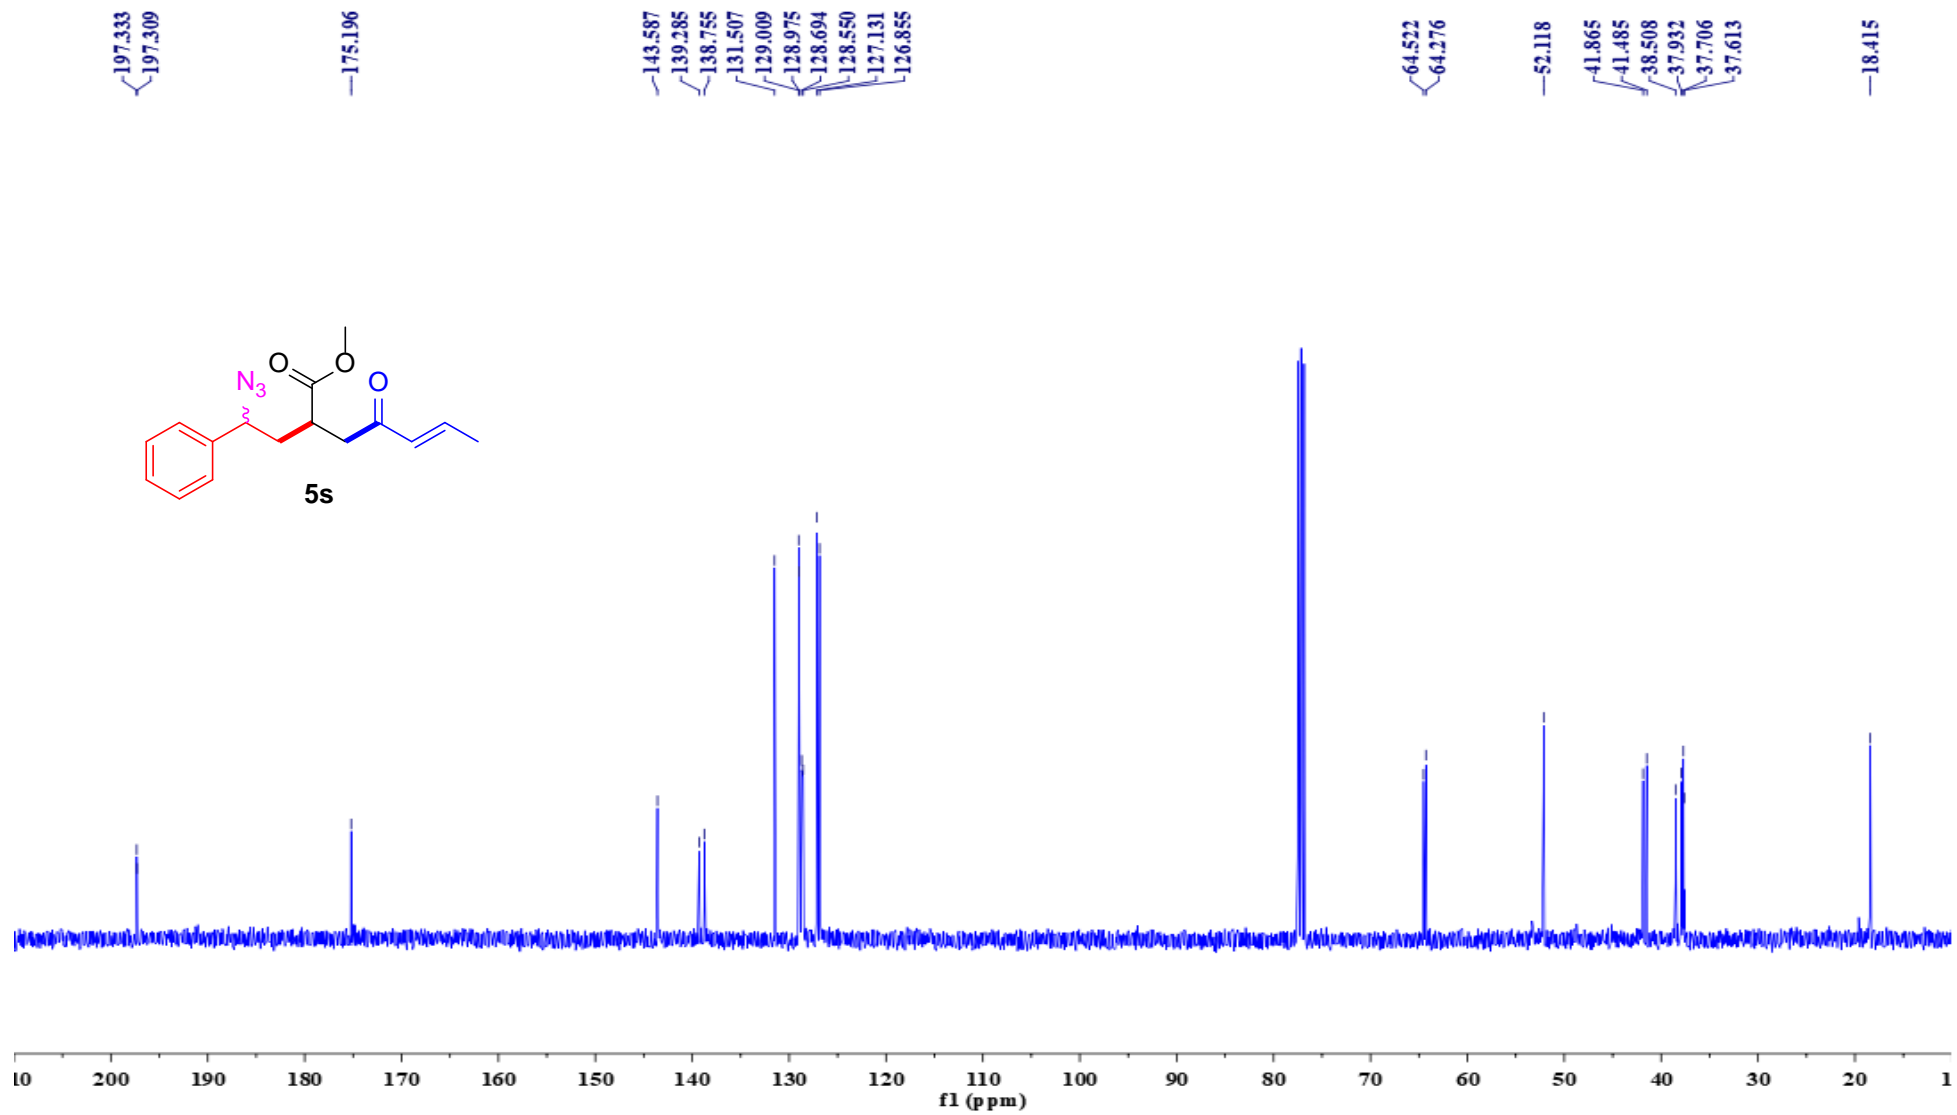

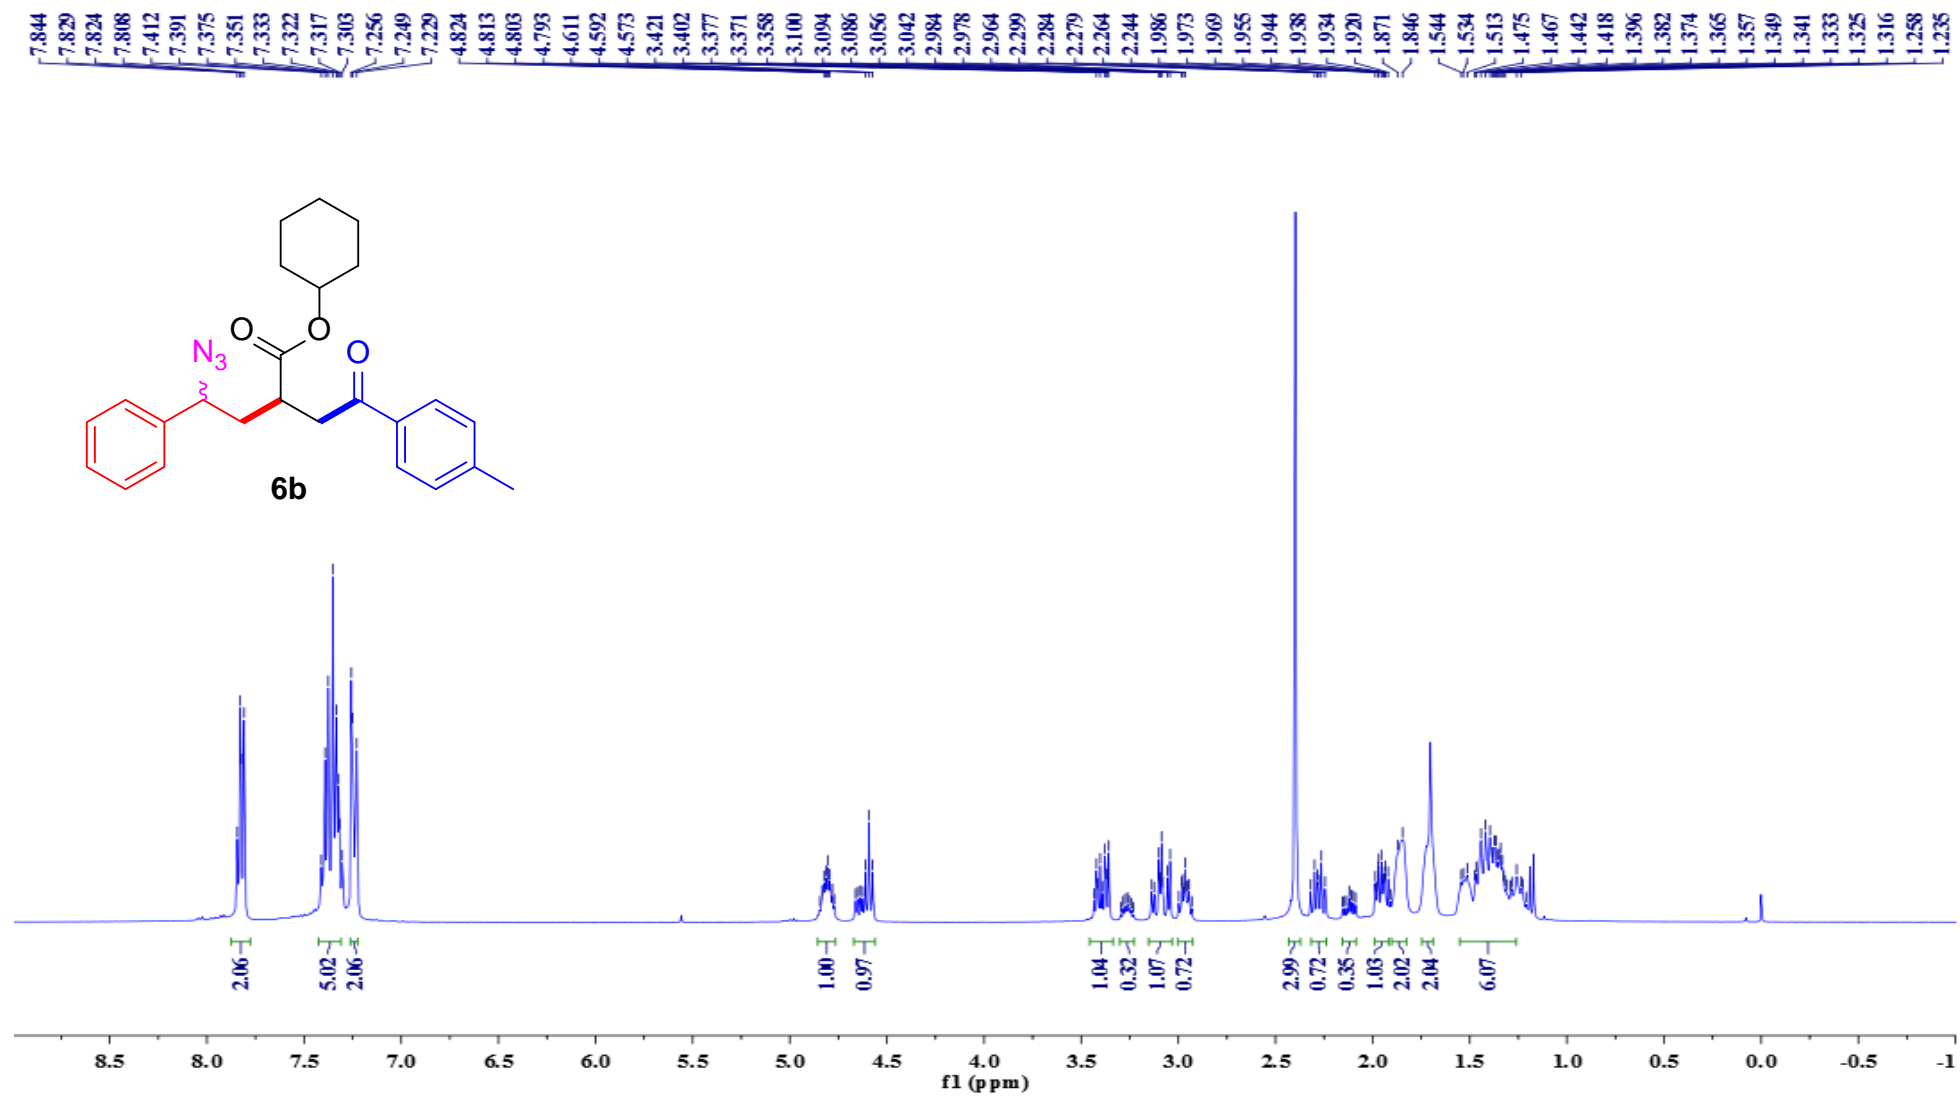

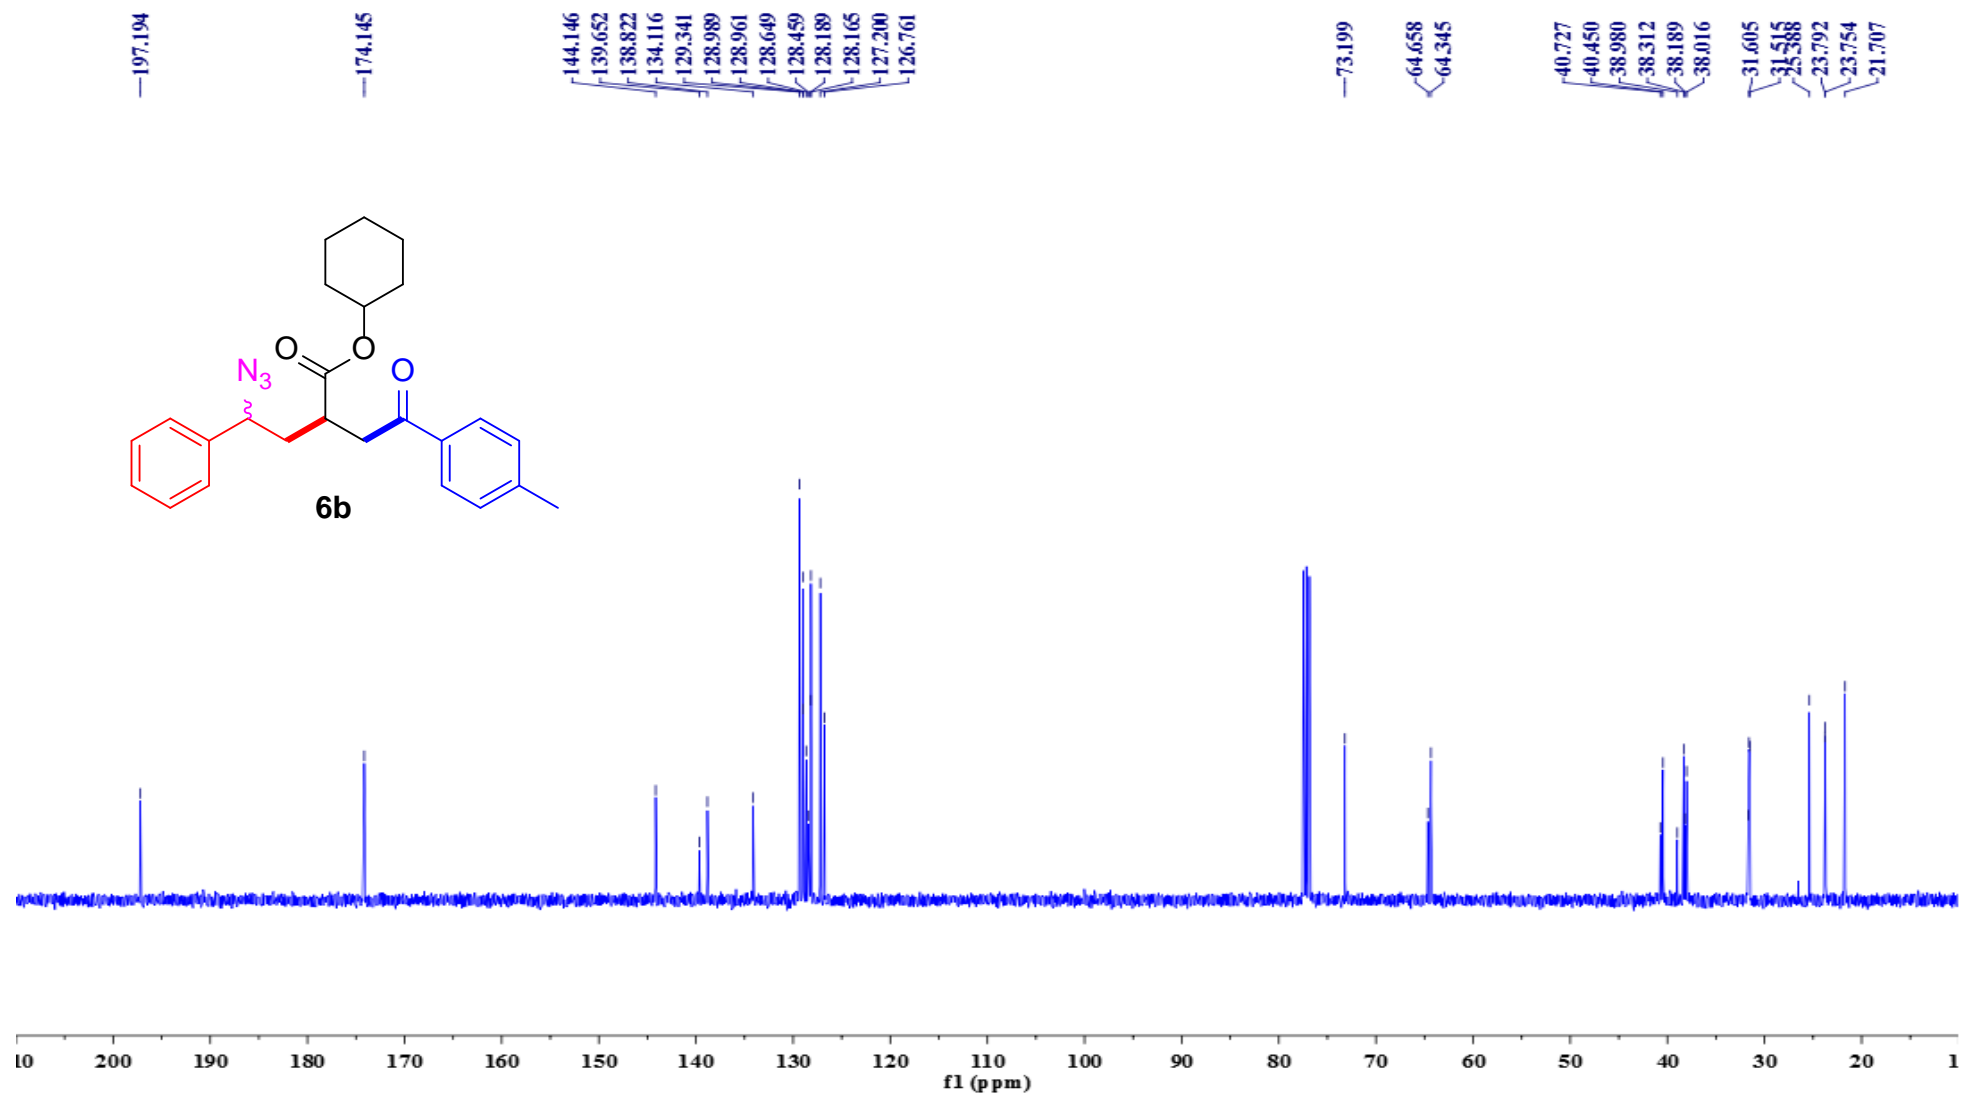

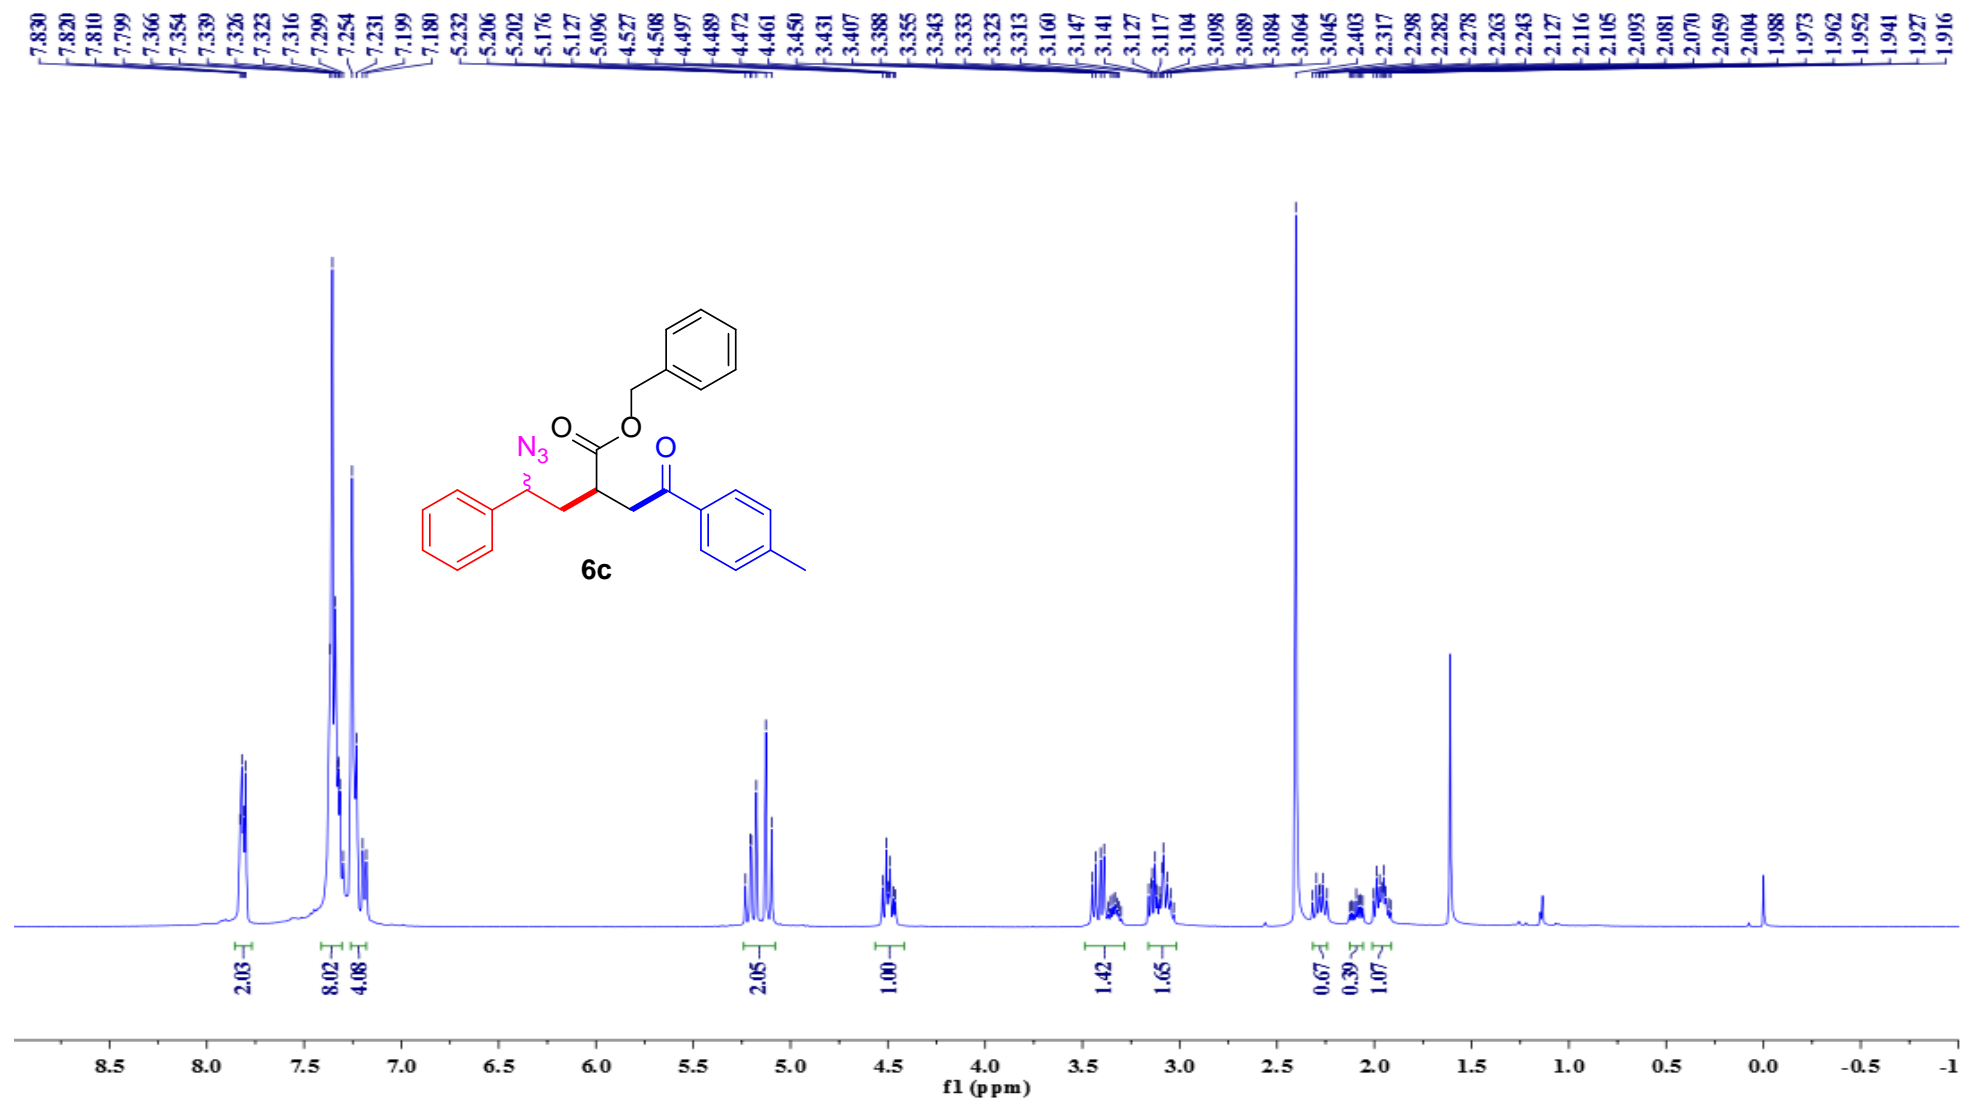

S104



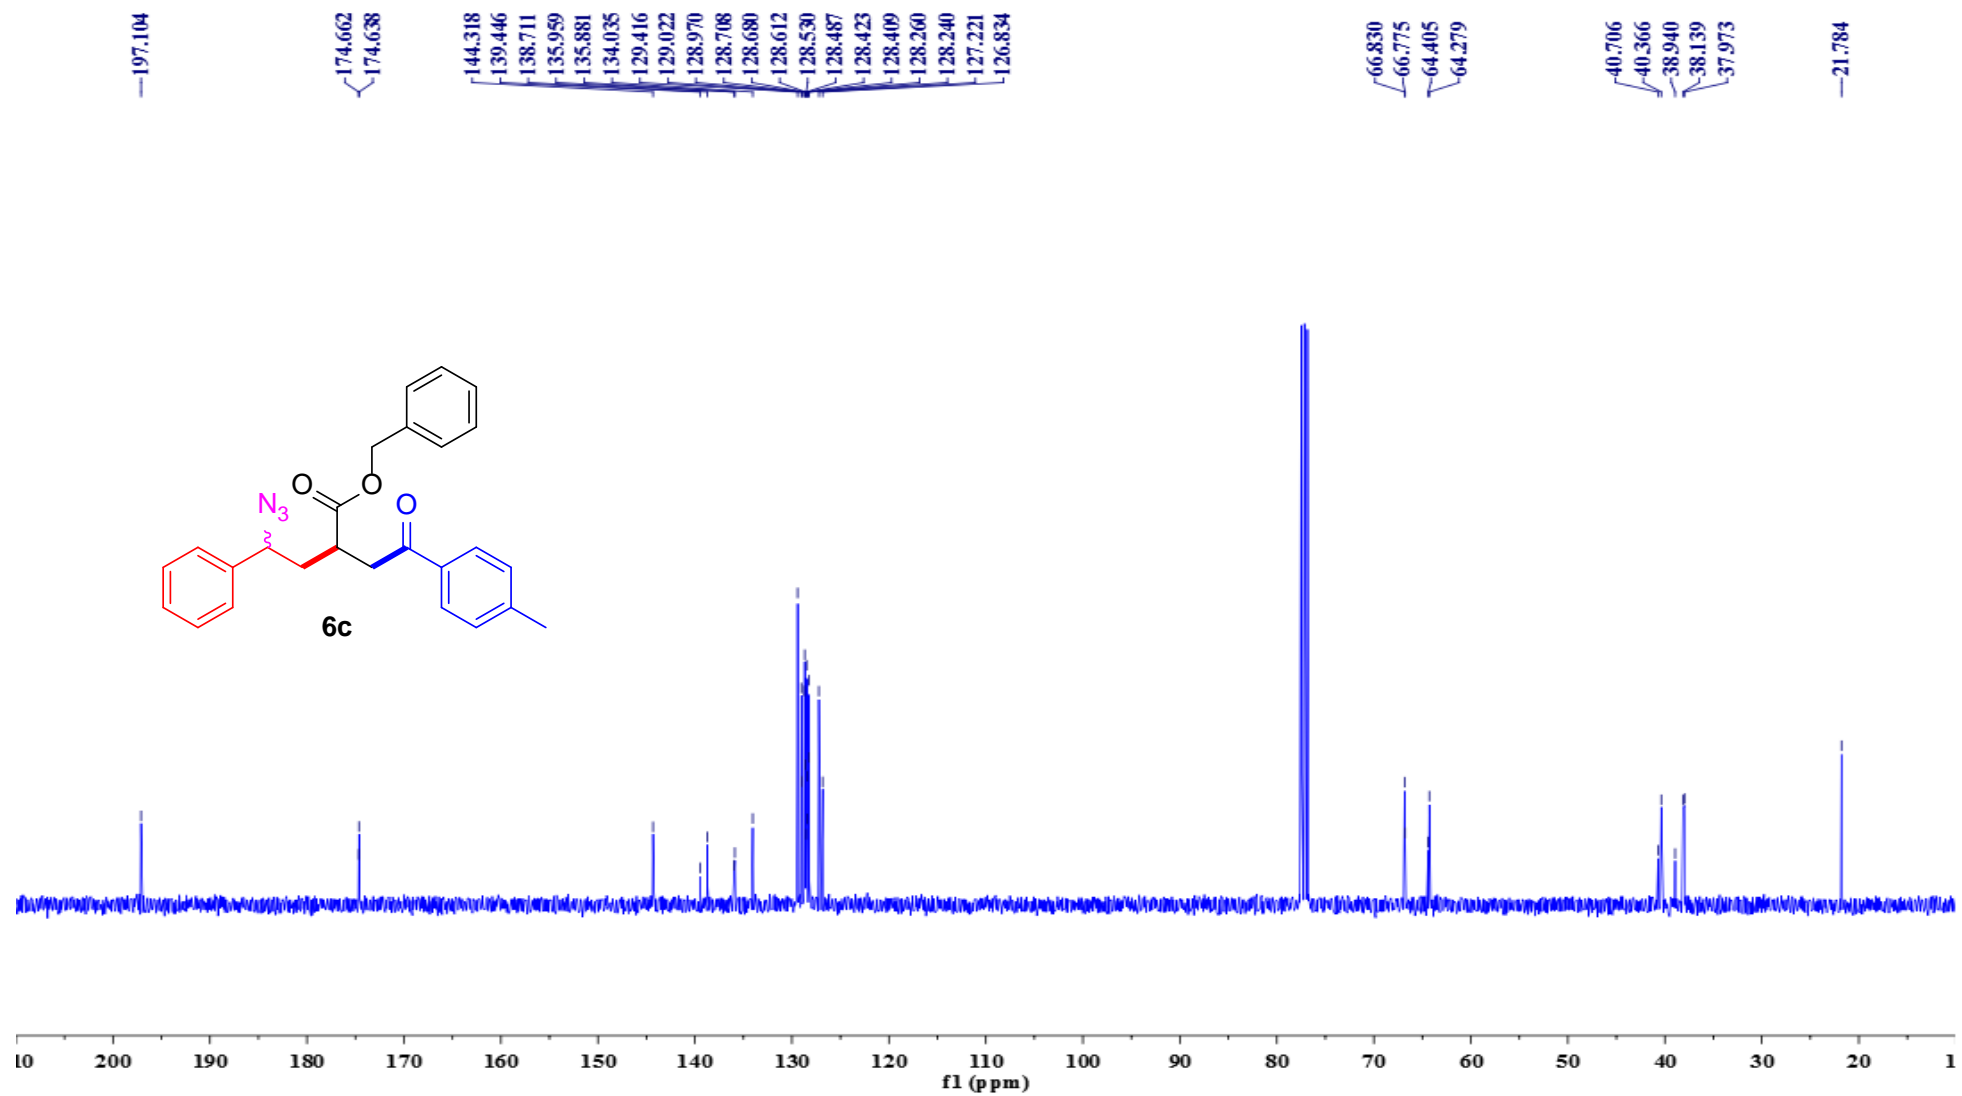

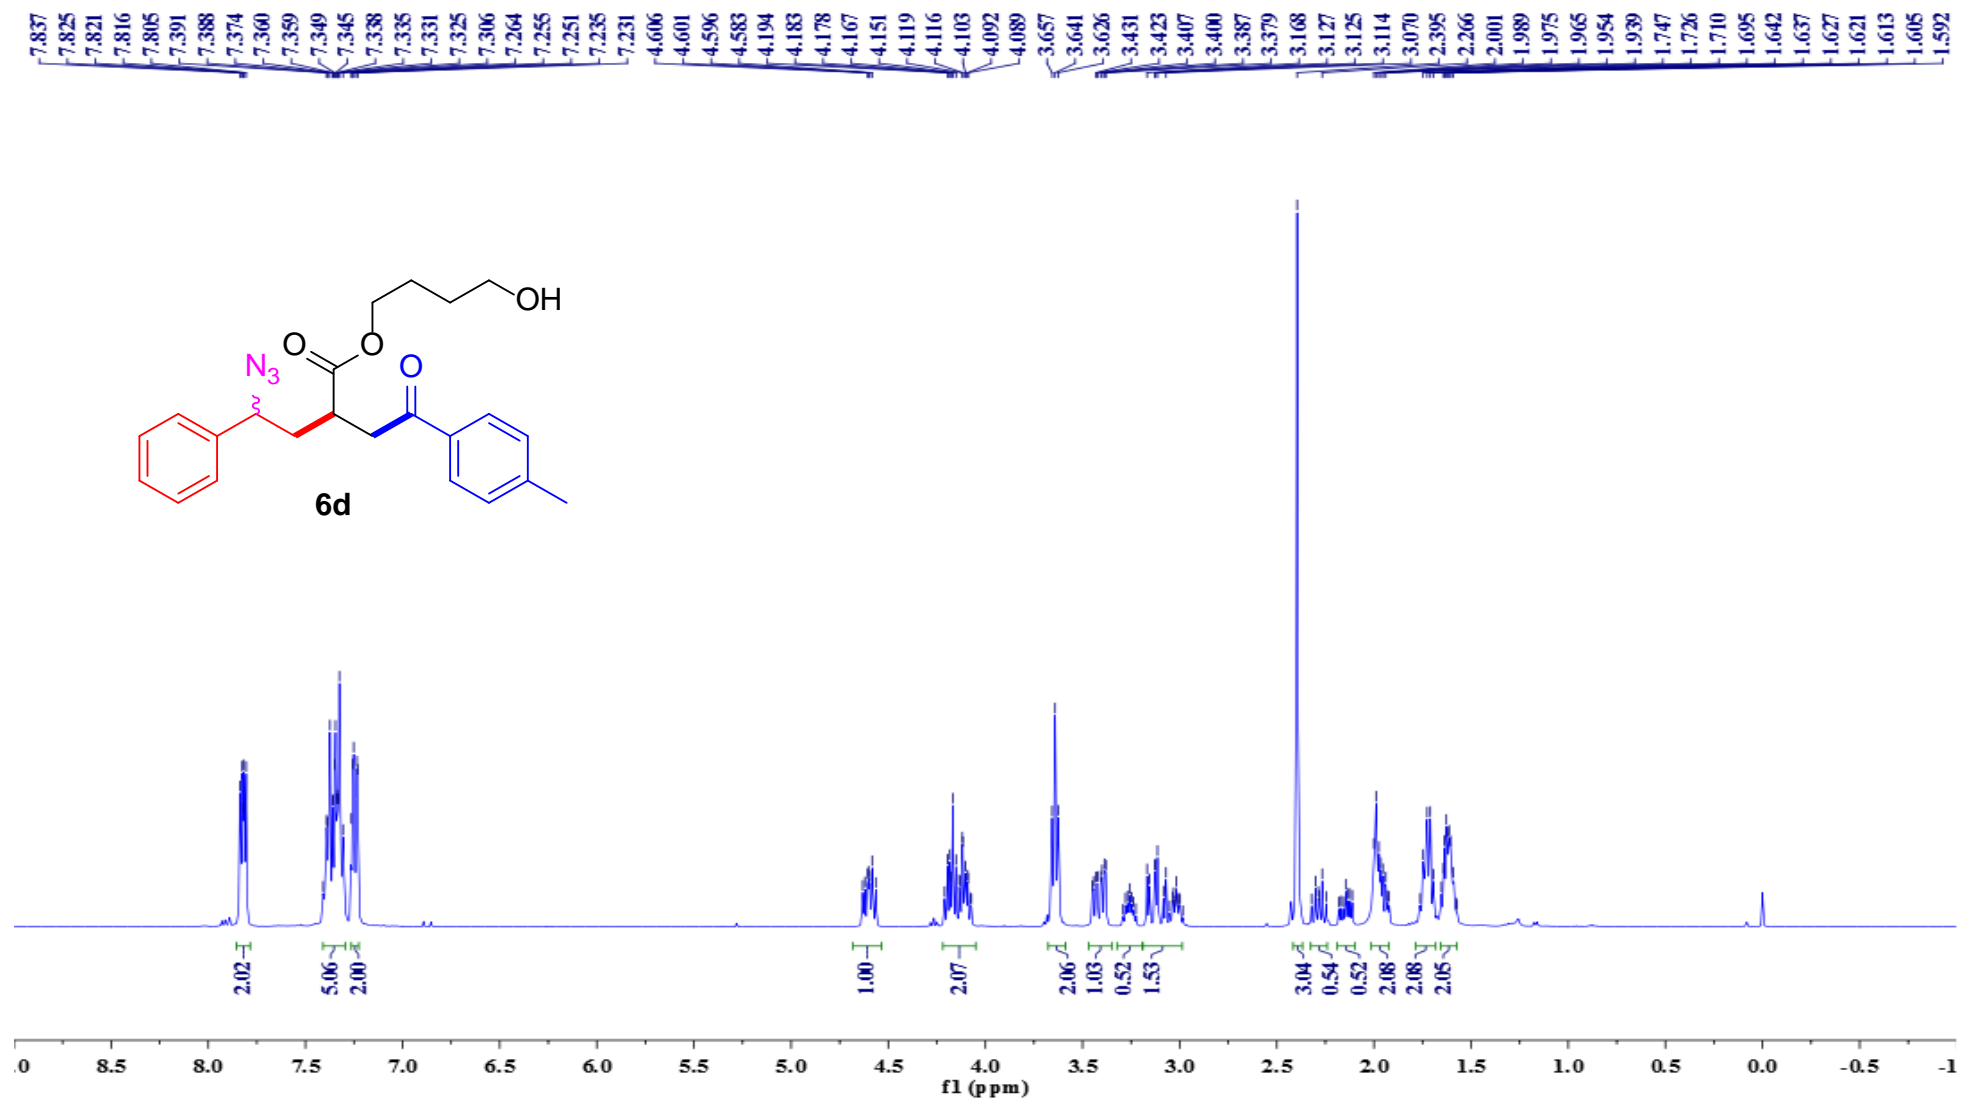

S106

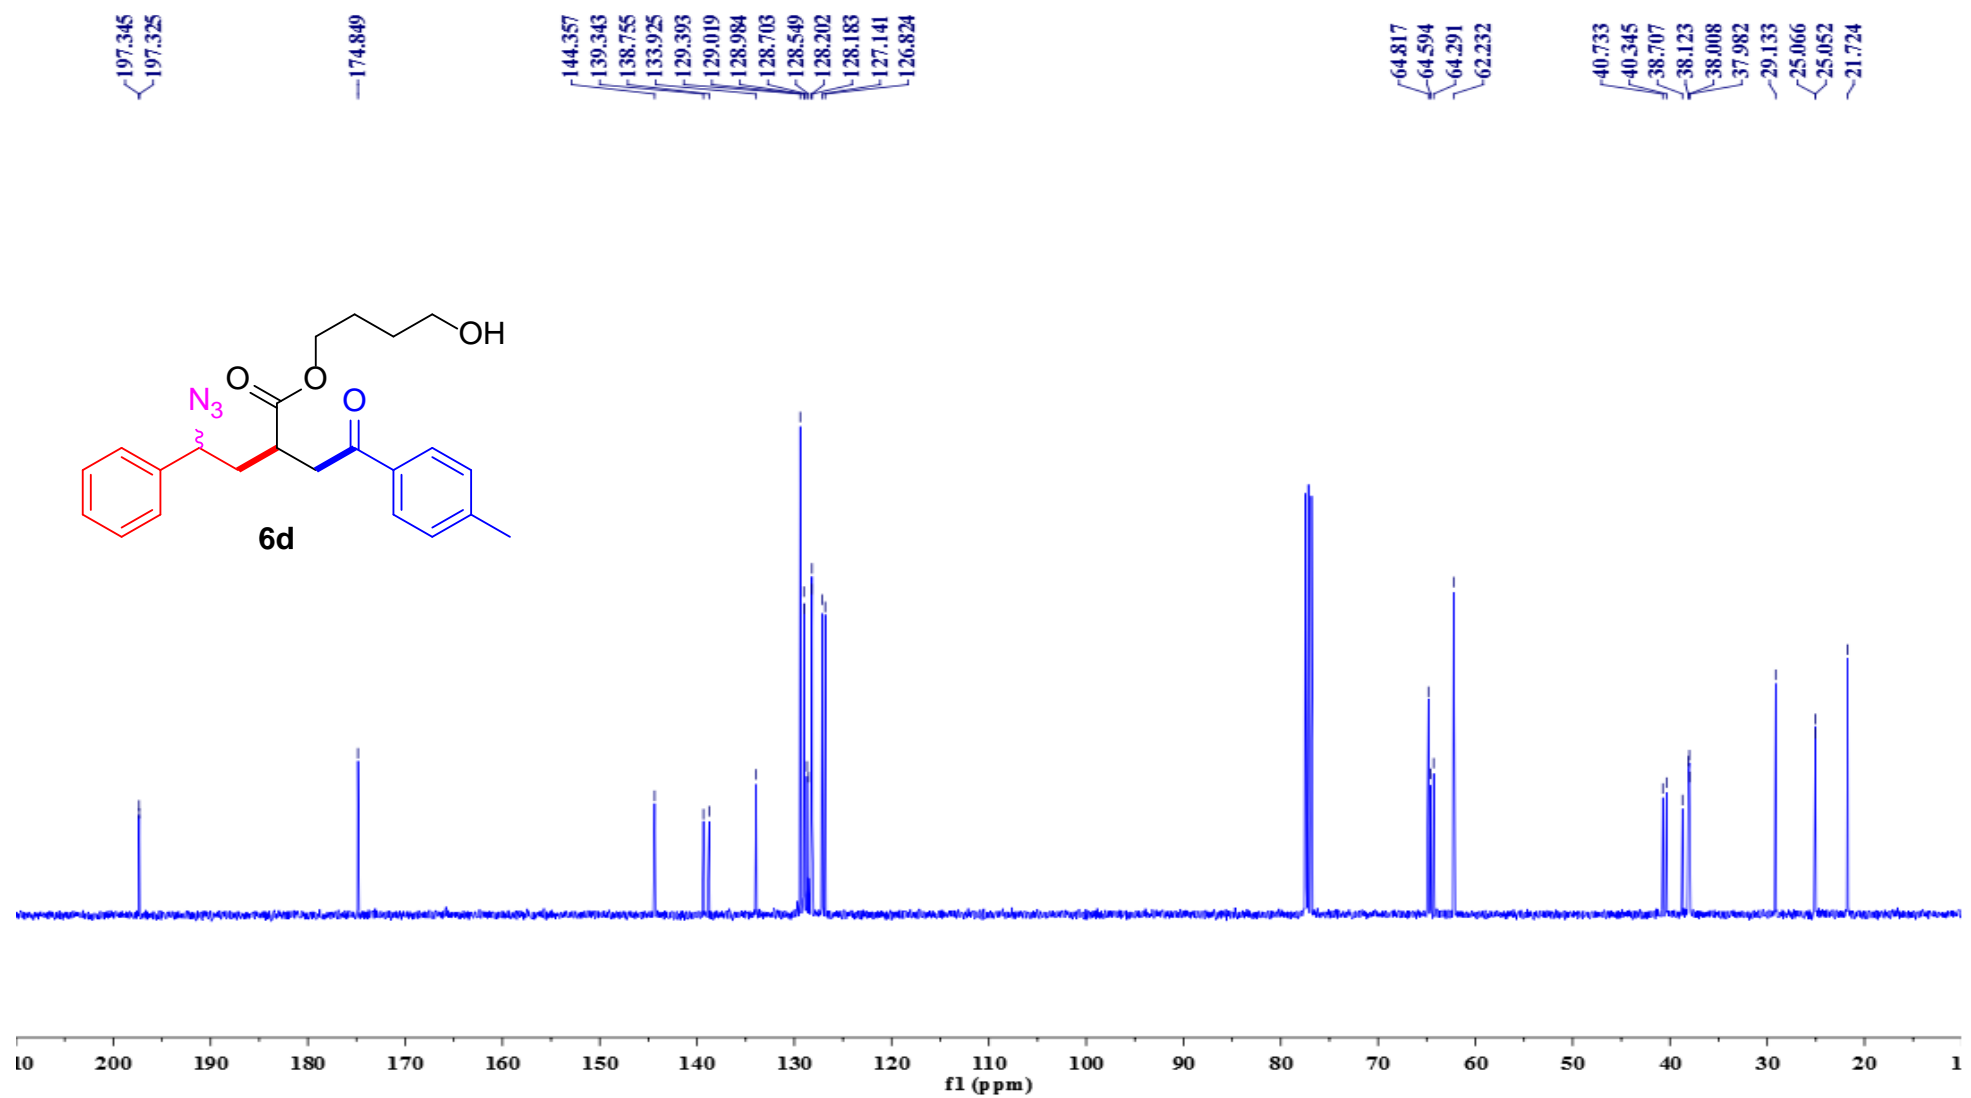

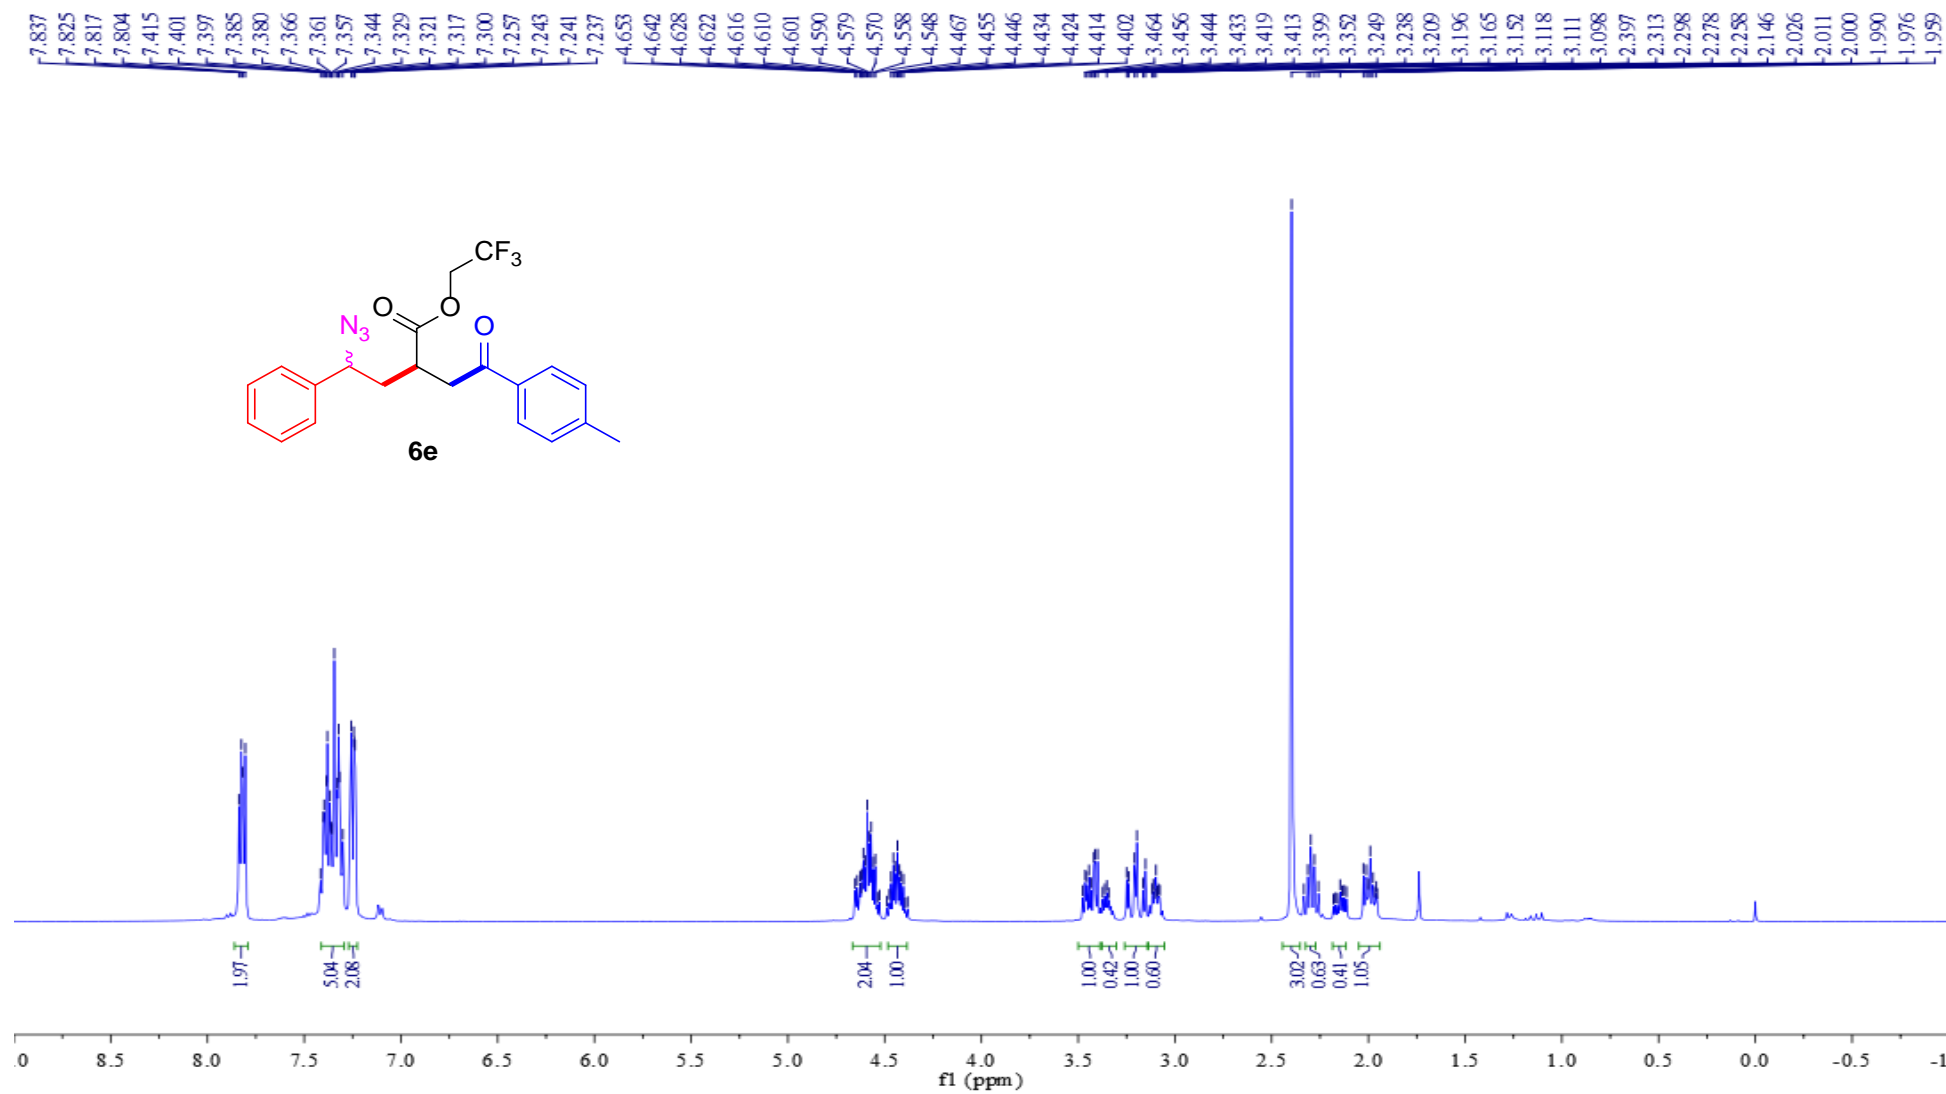

S108

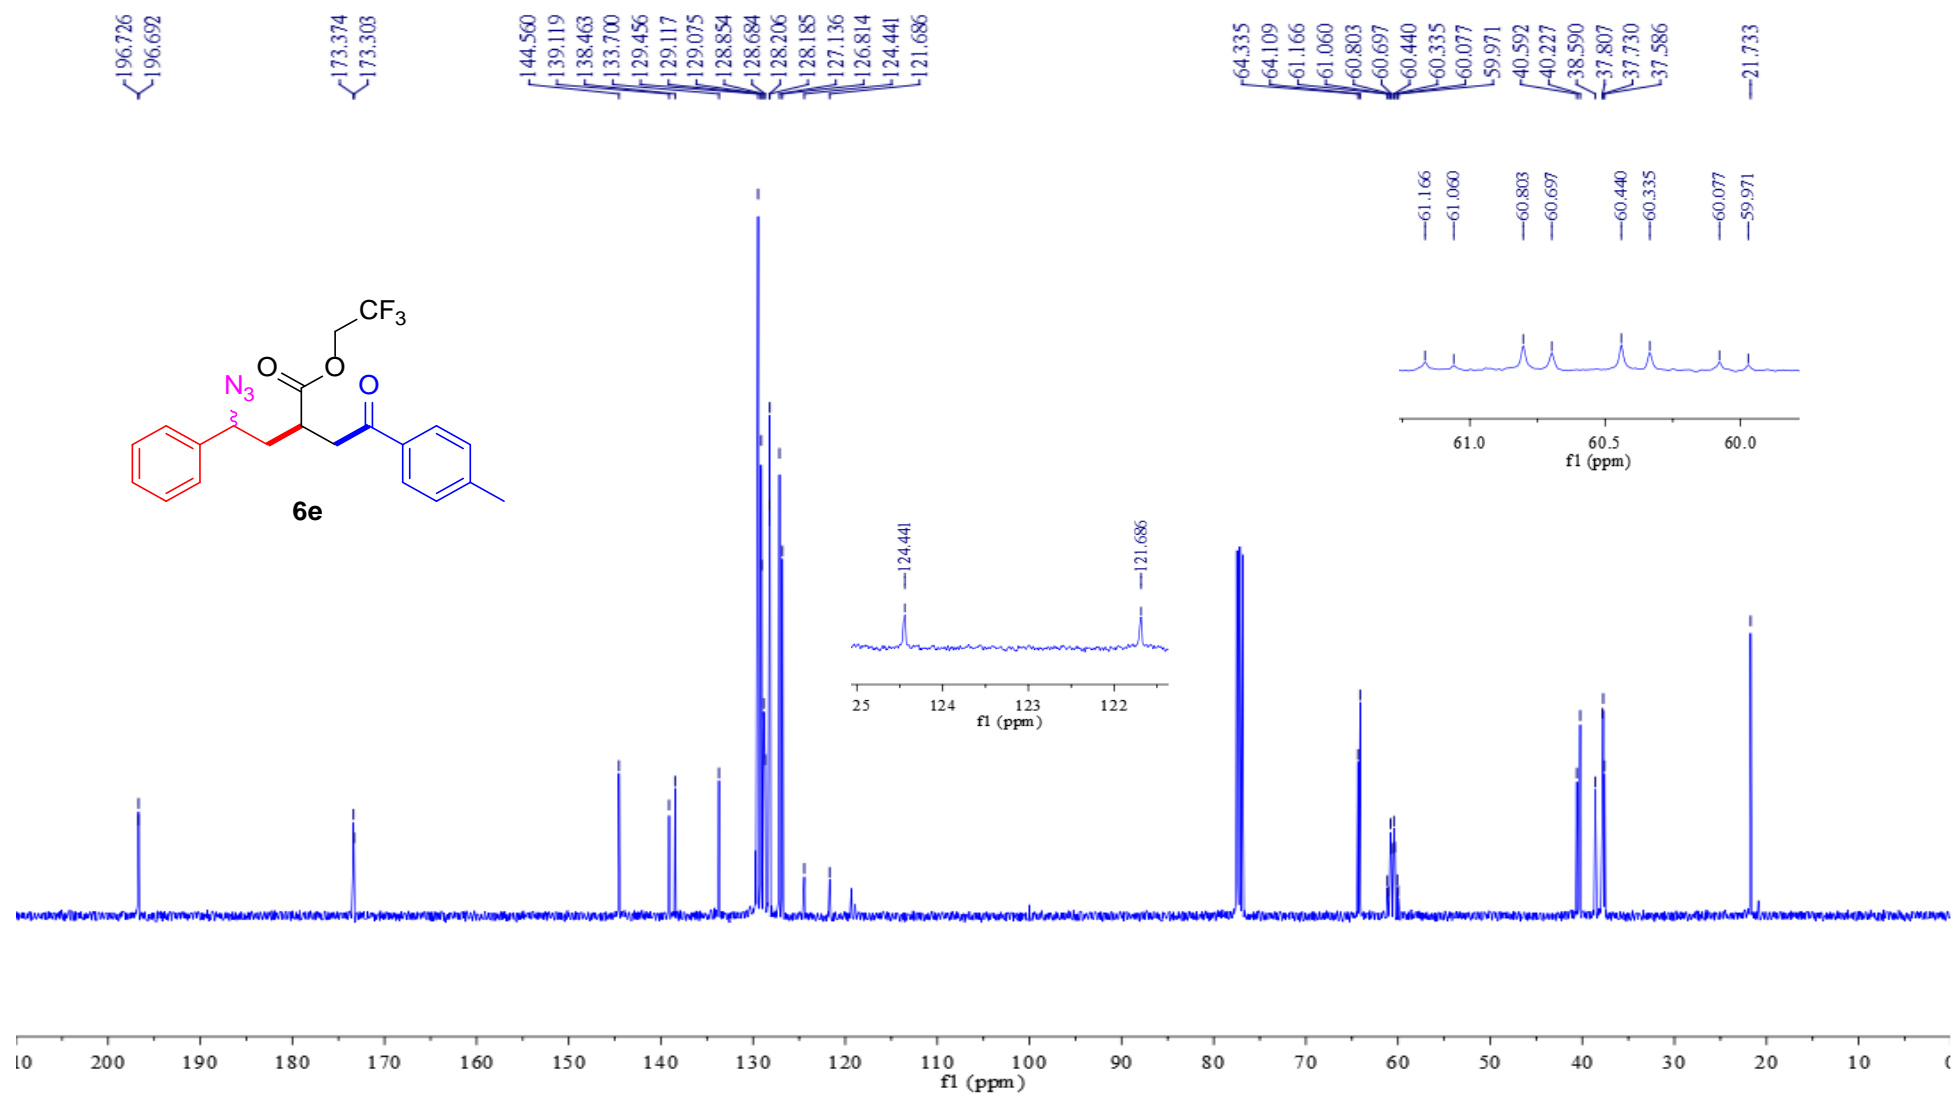

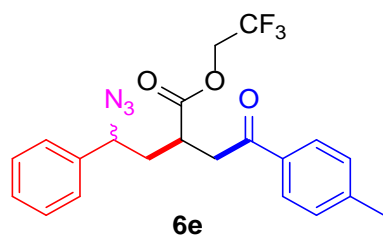

-73.493  
-73.505

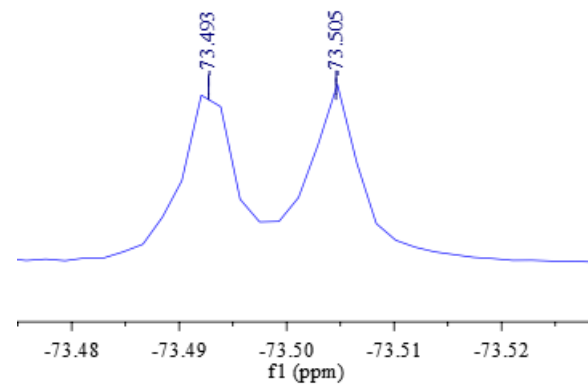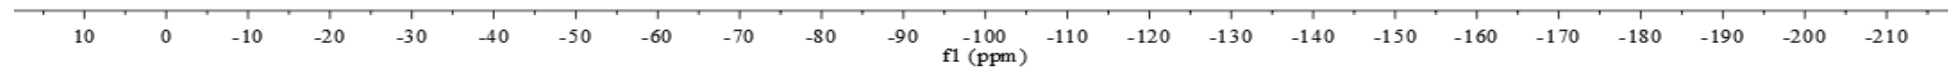

S110

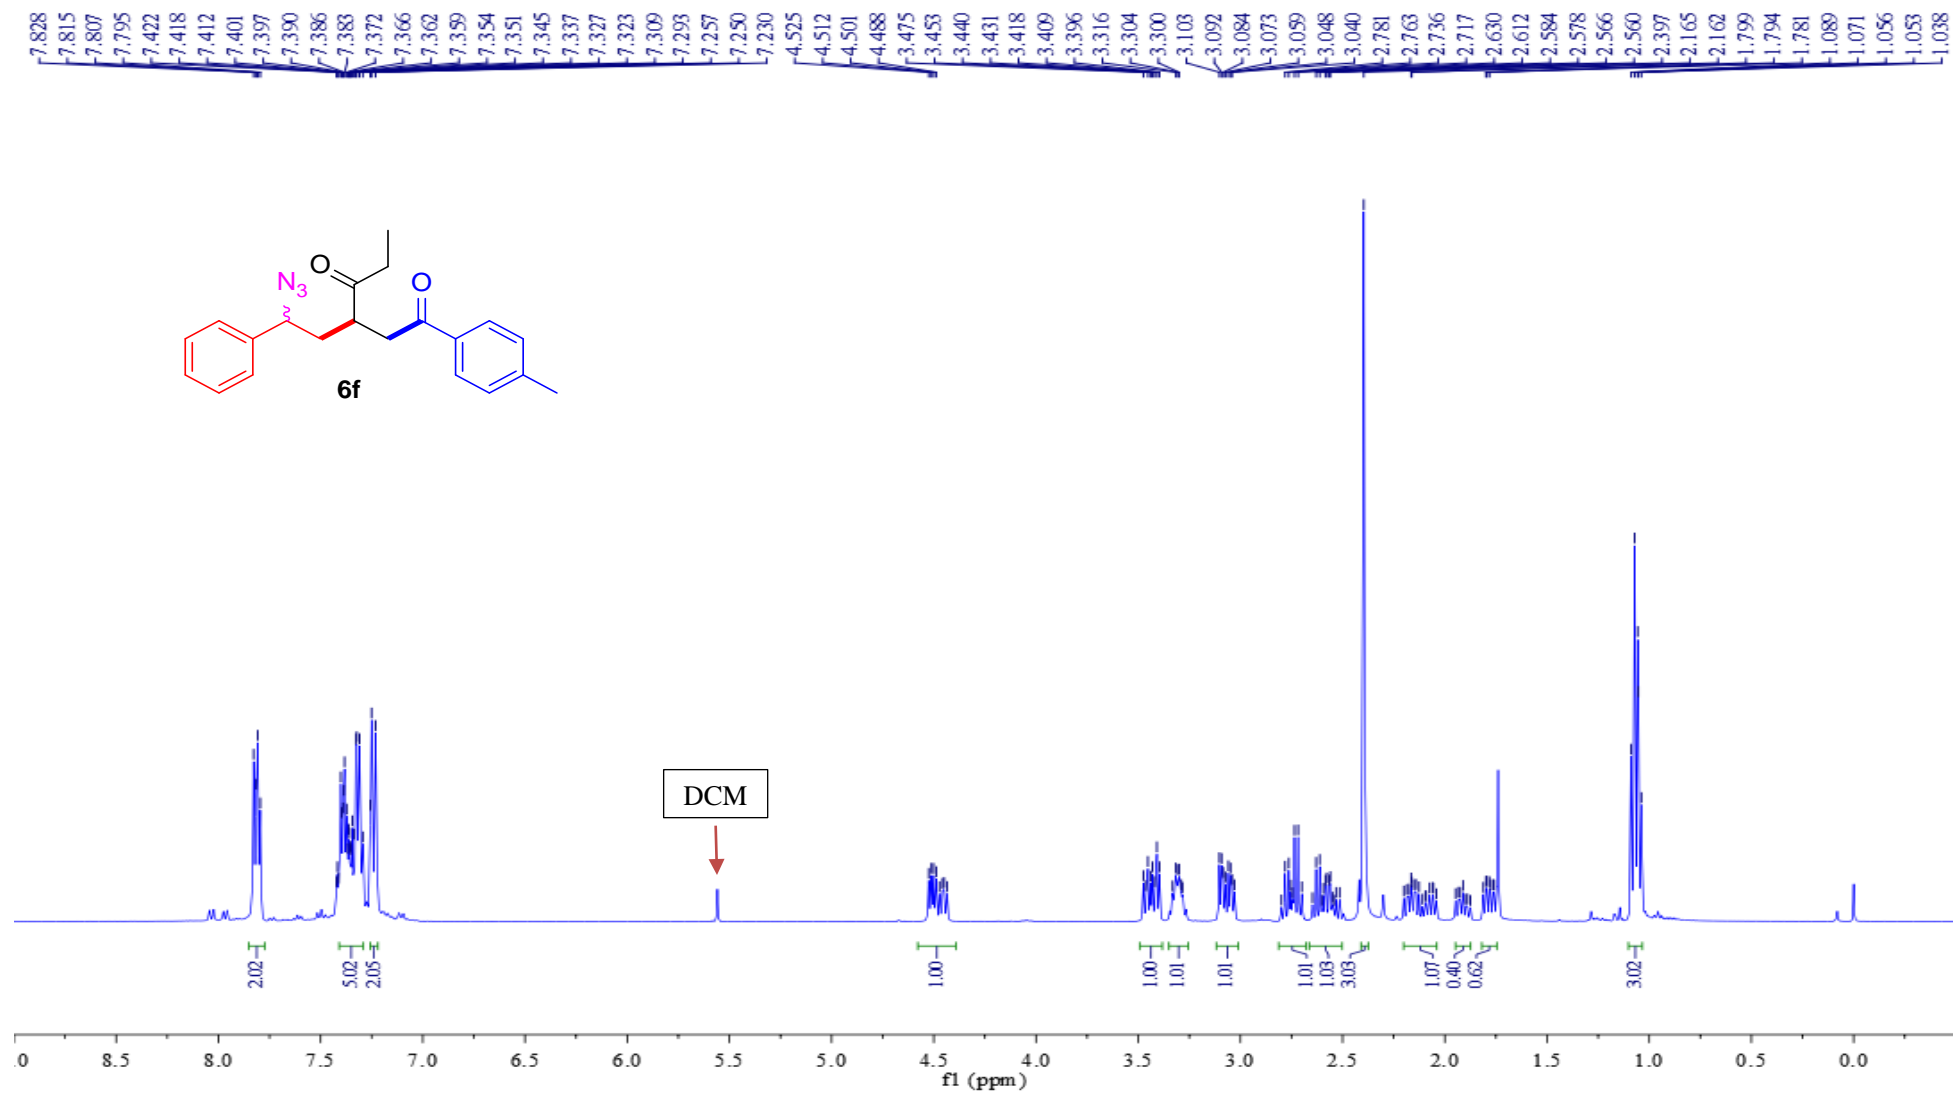

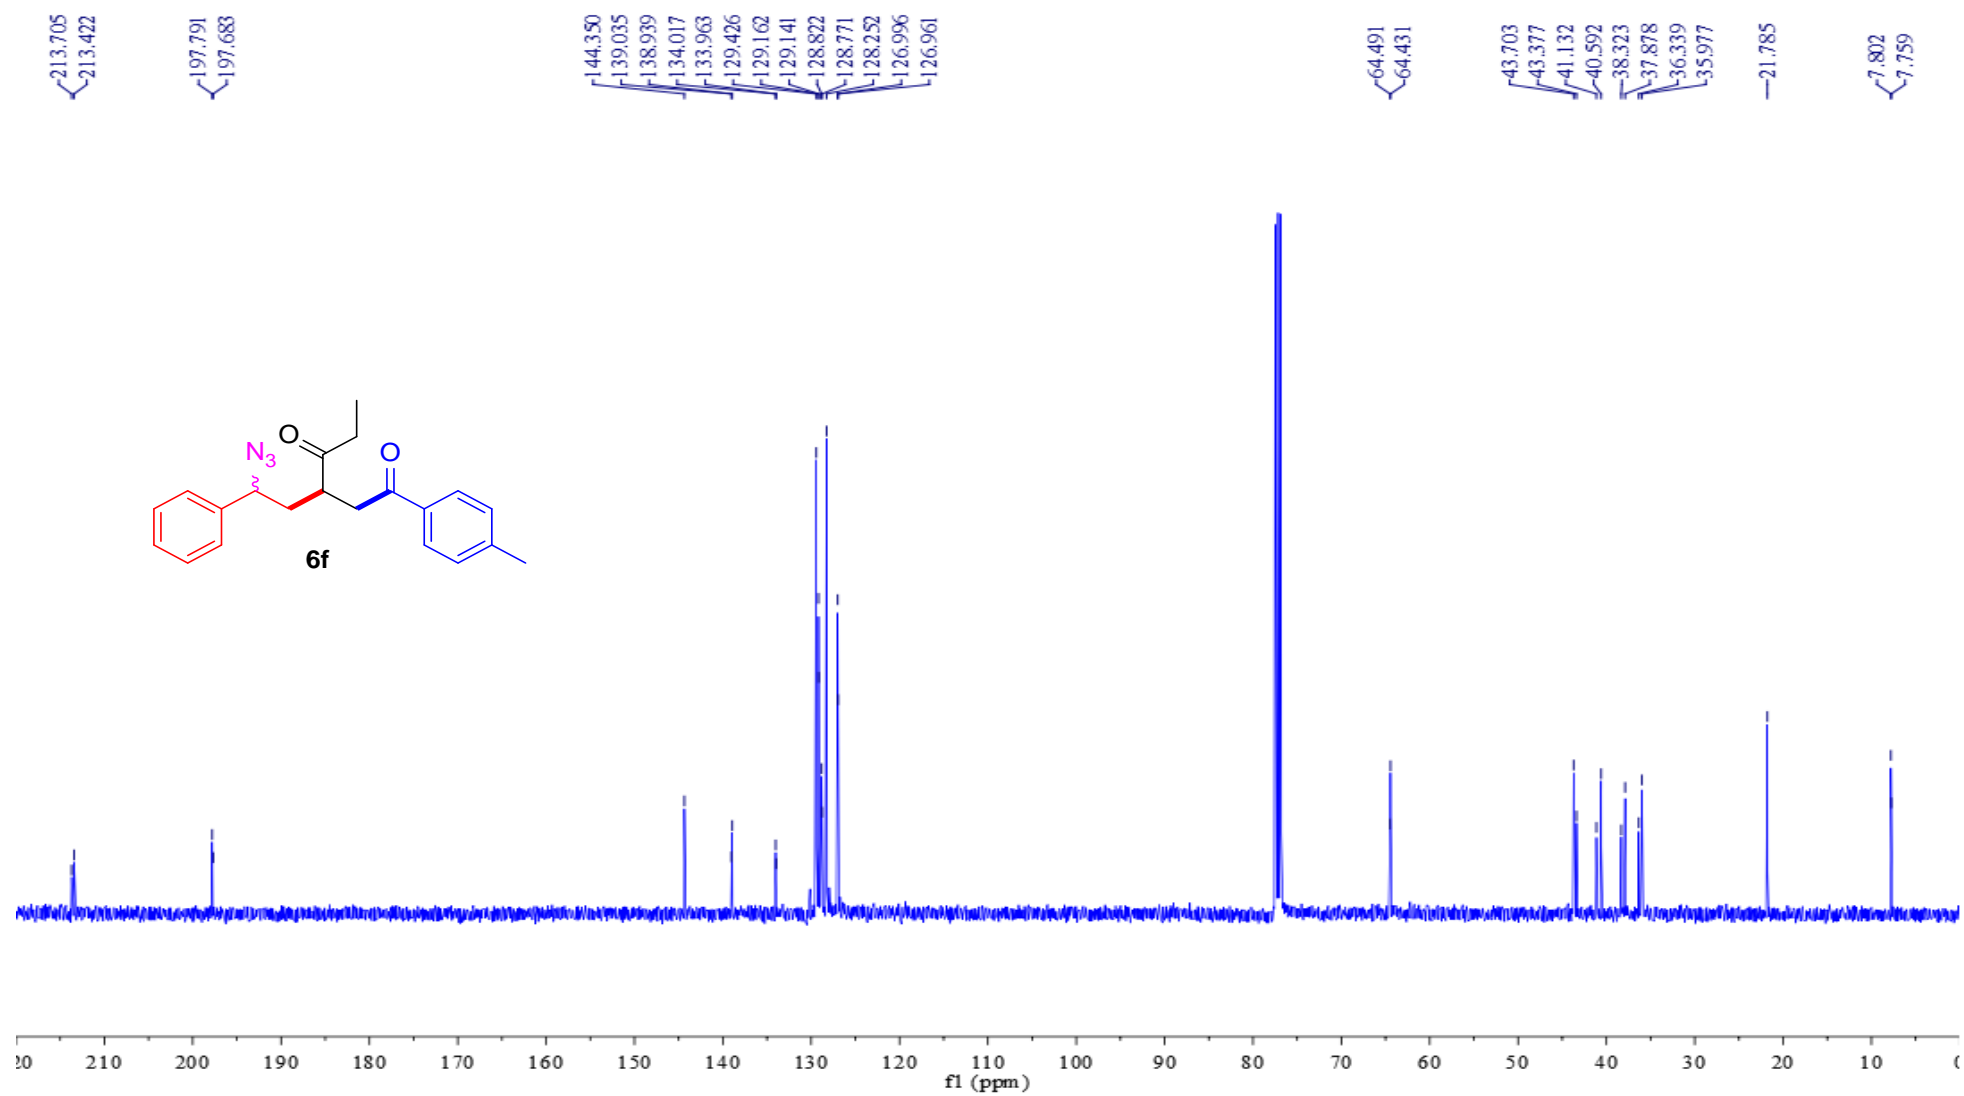



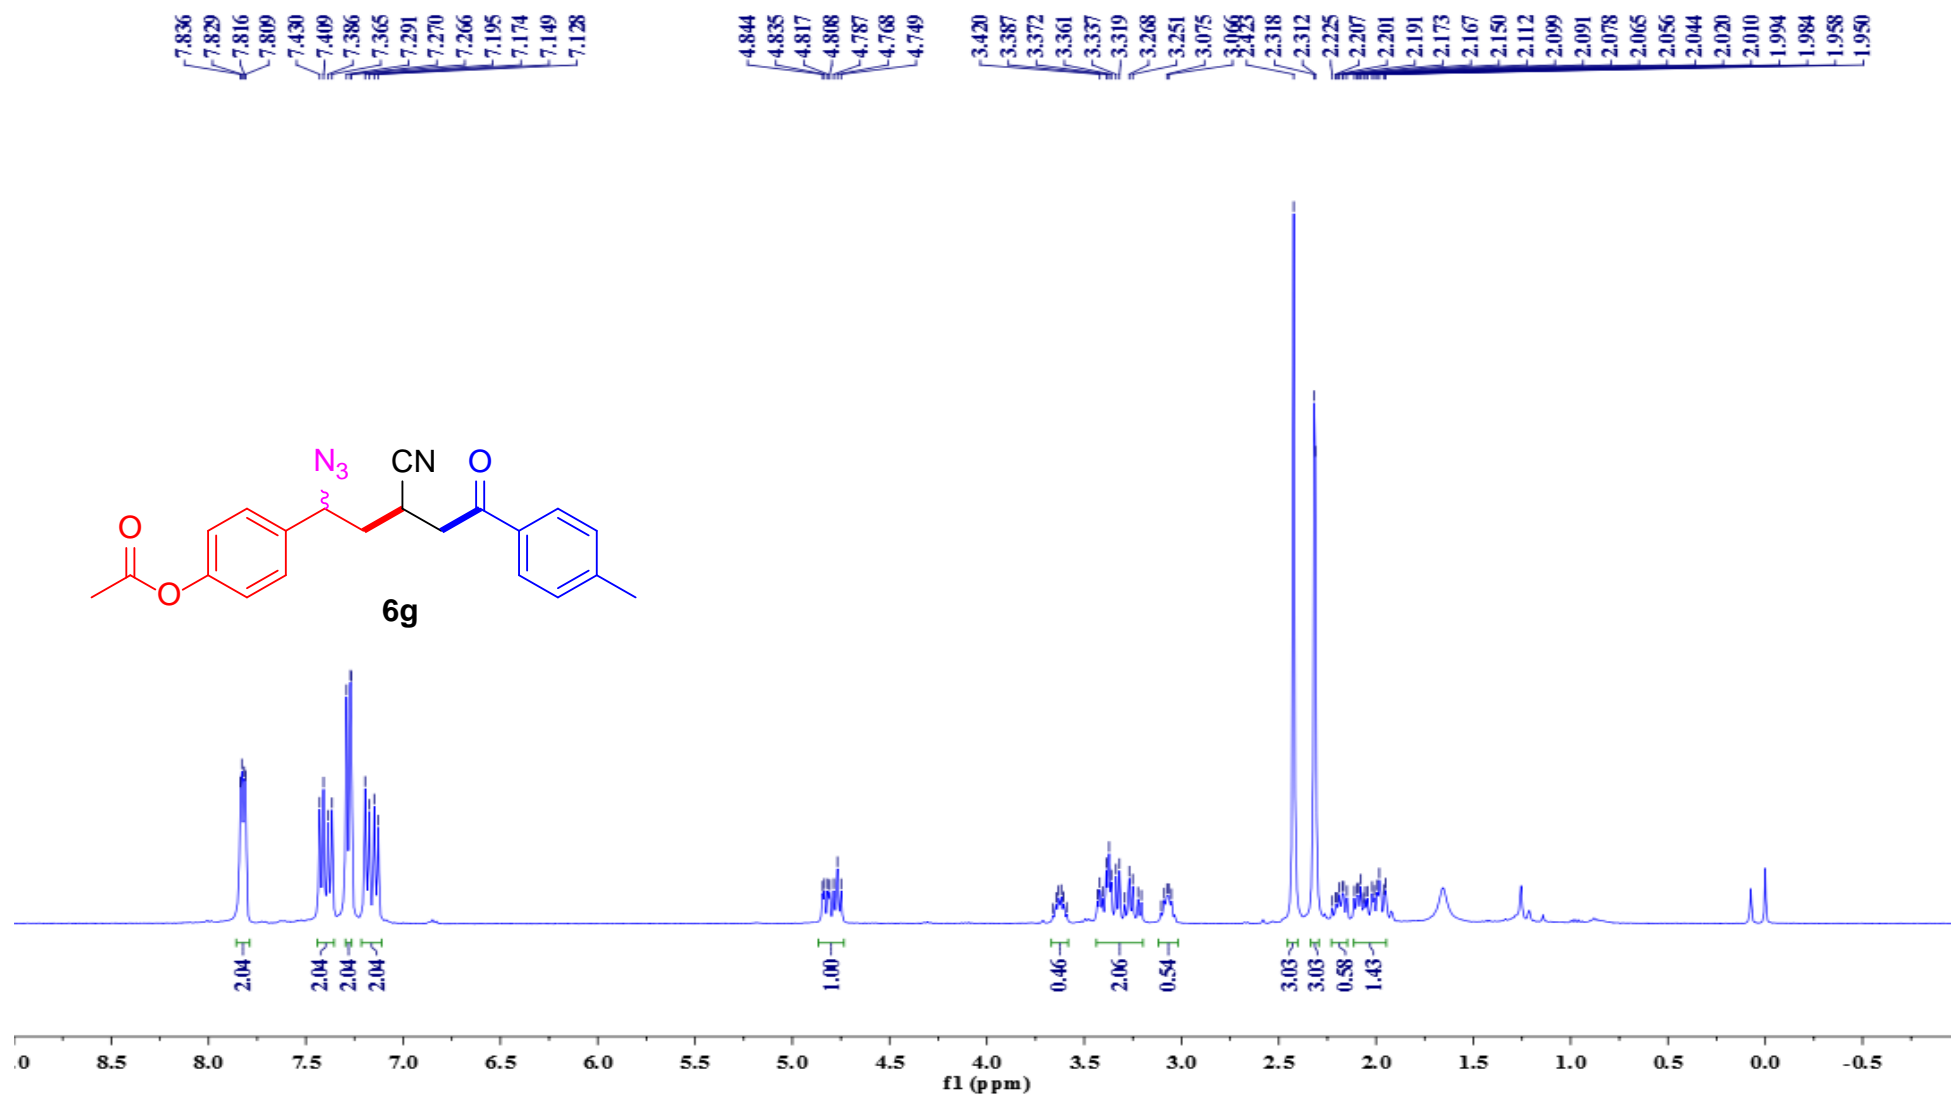

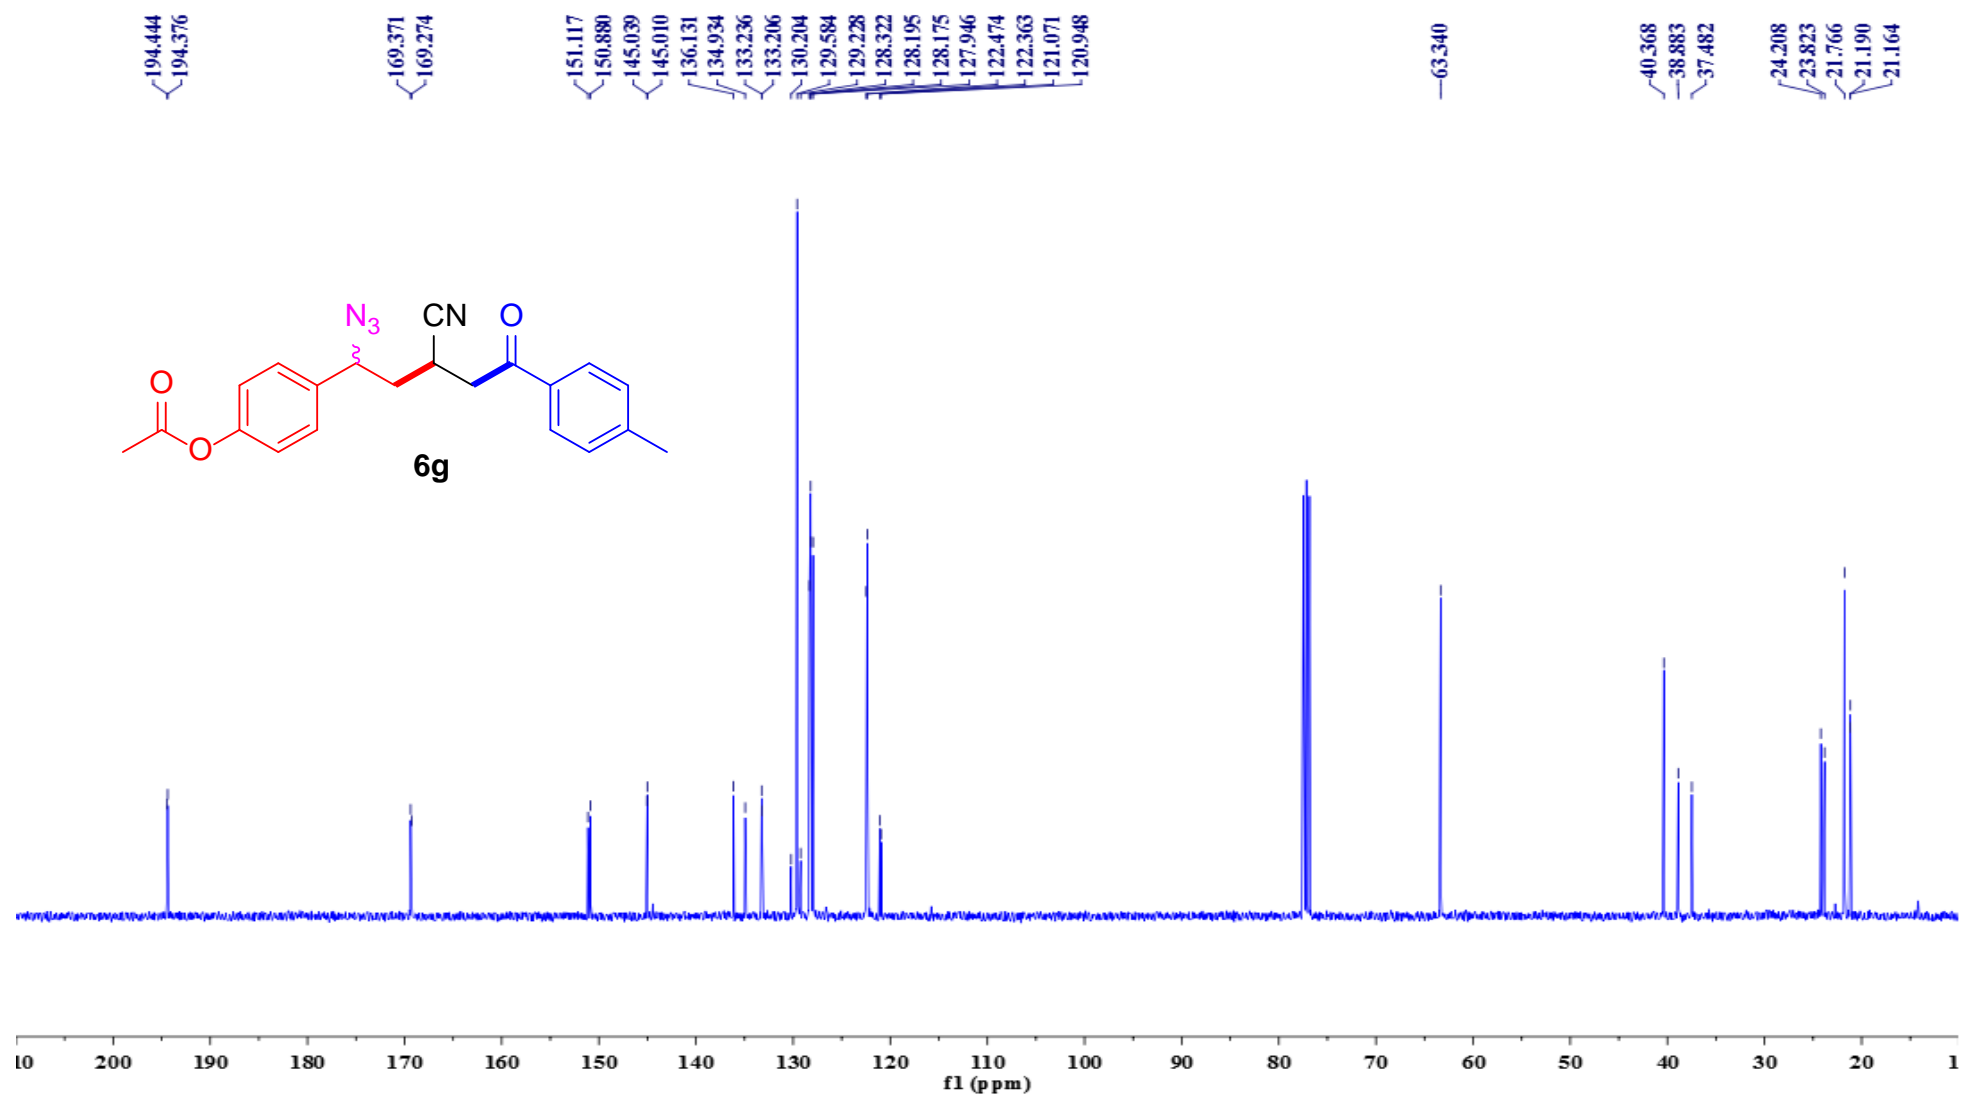

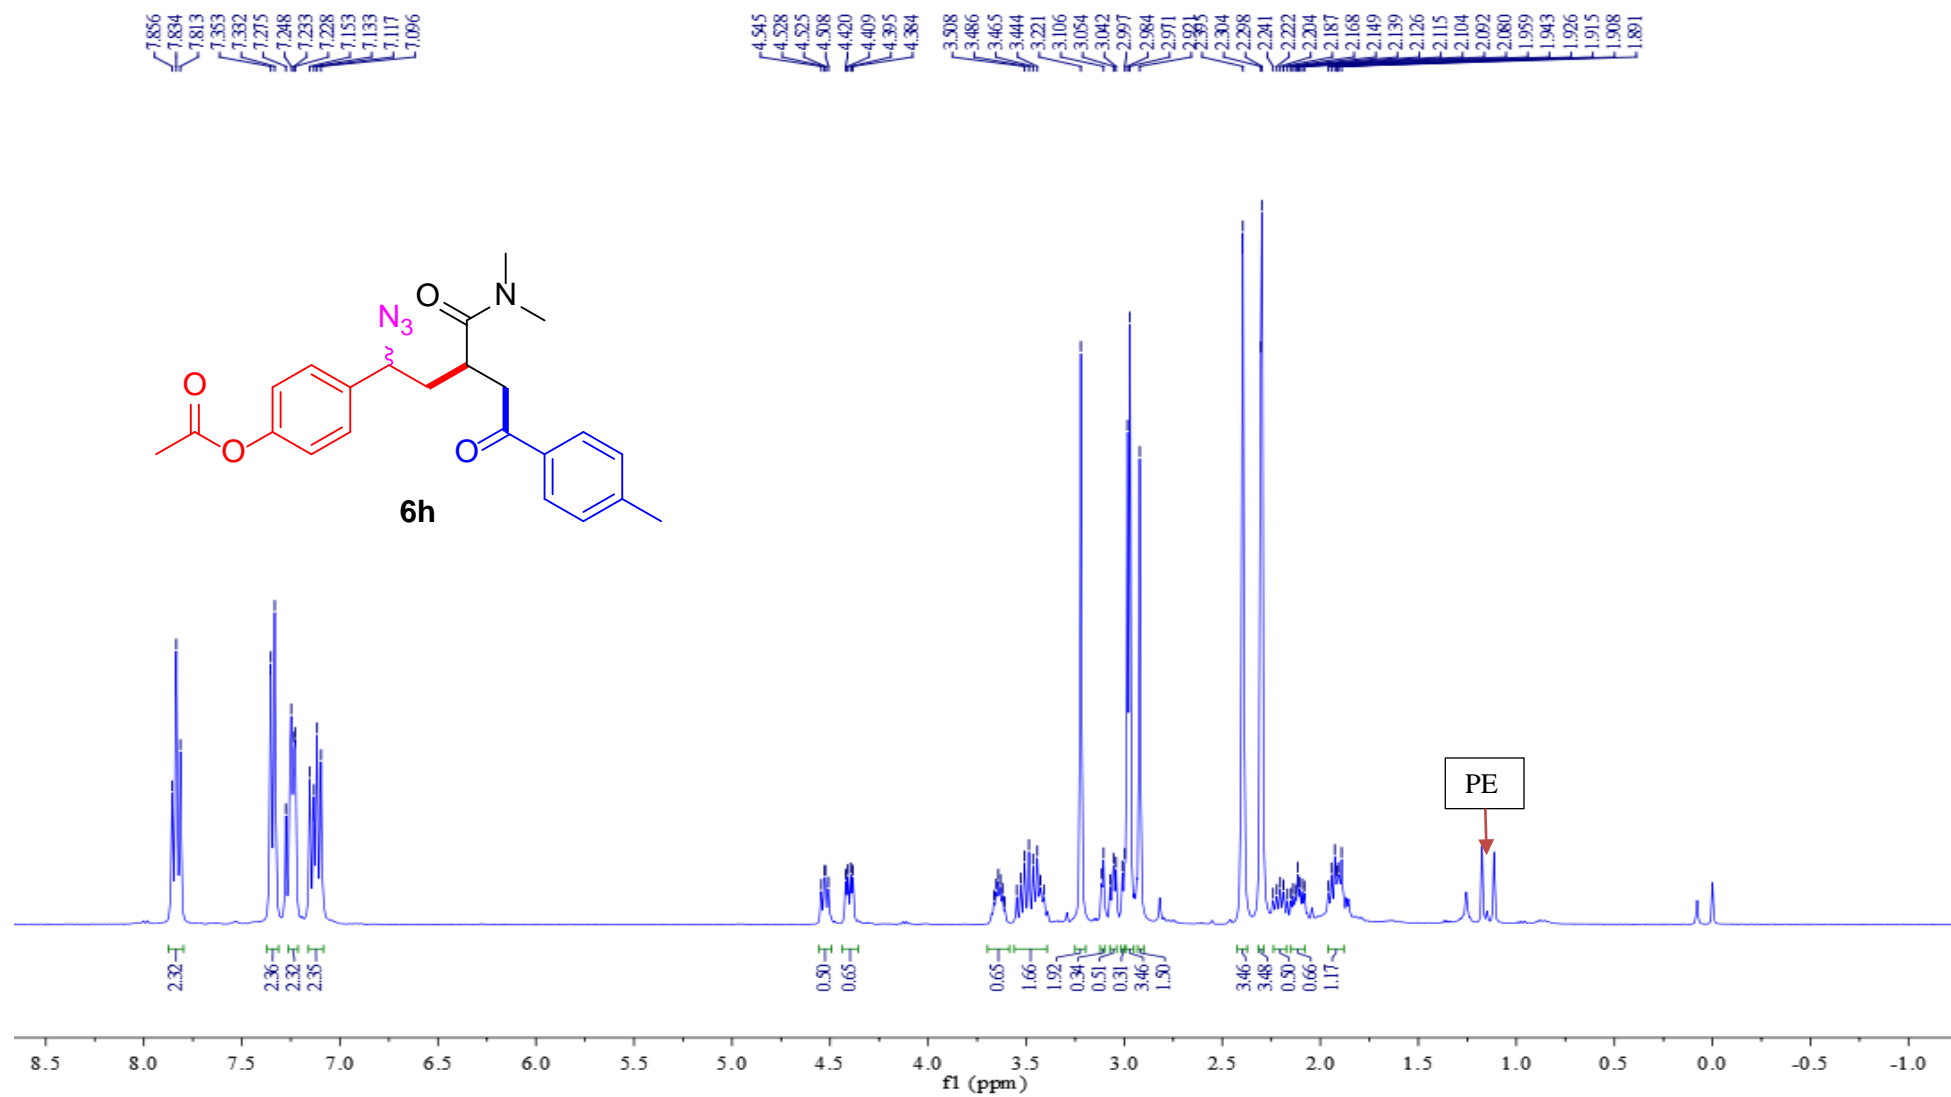

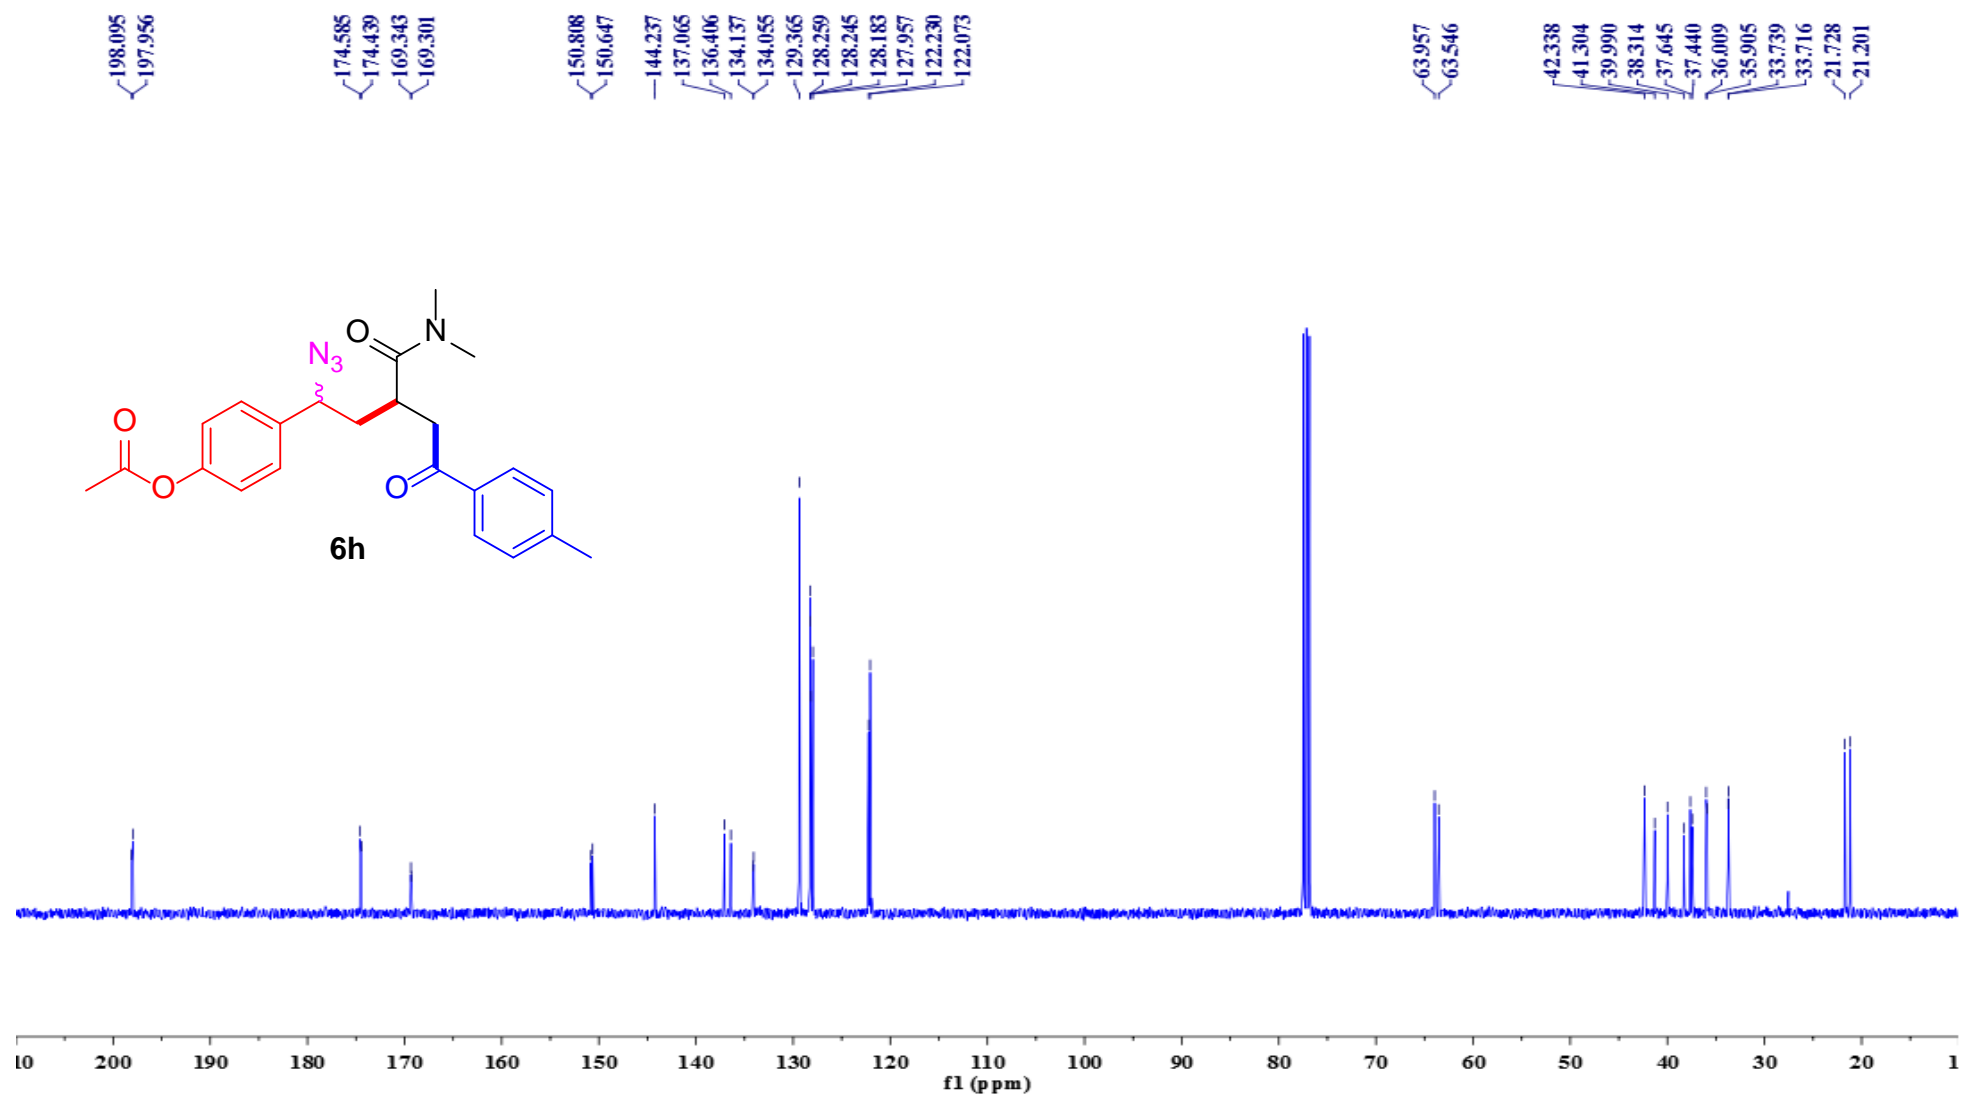

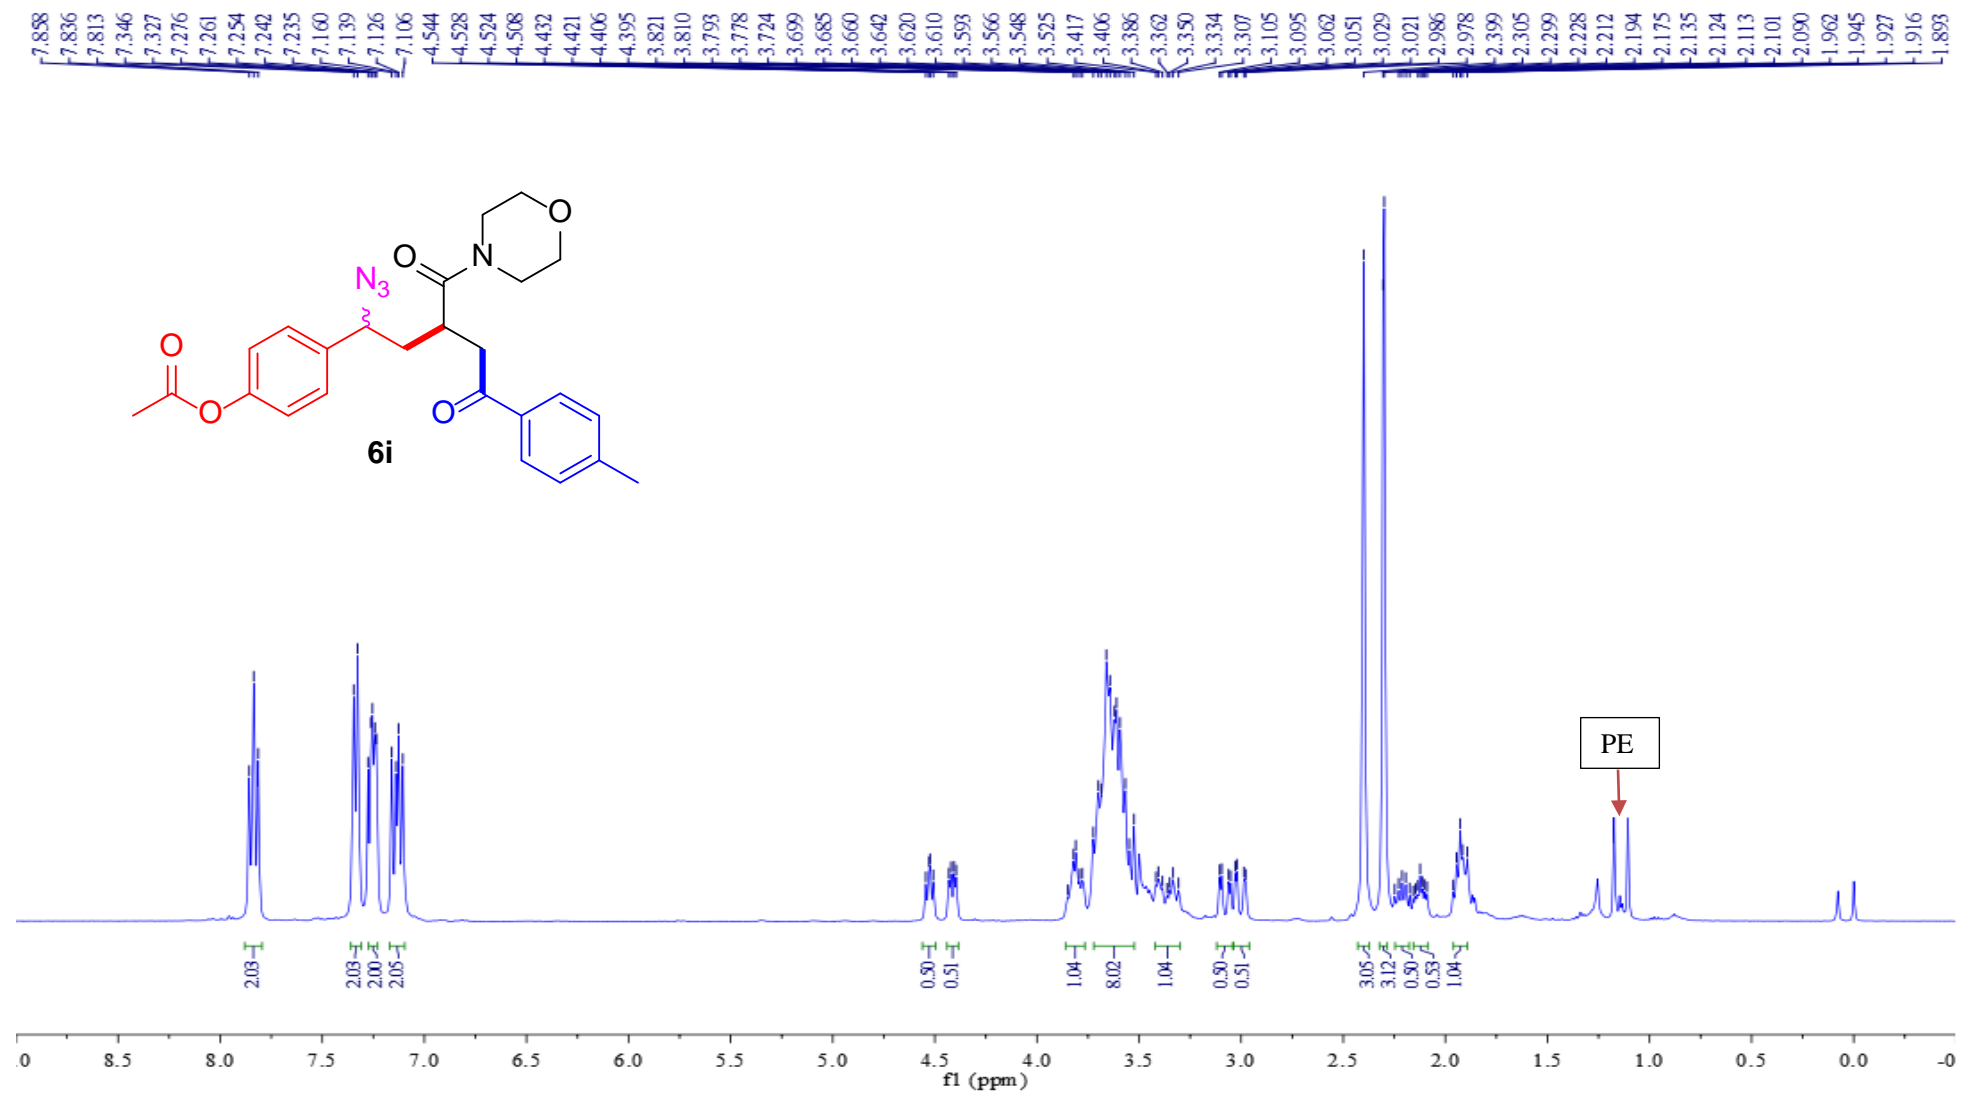

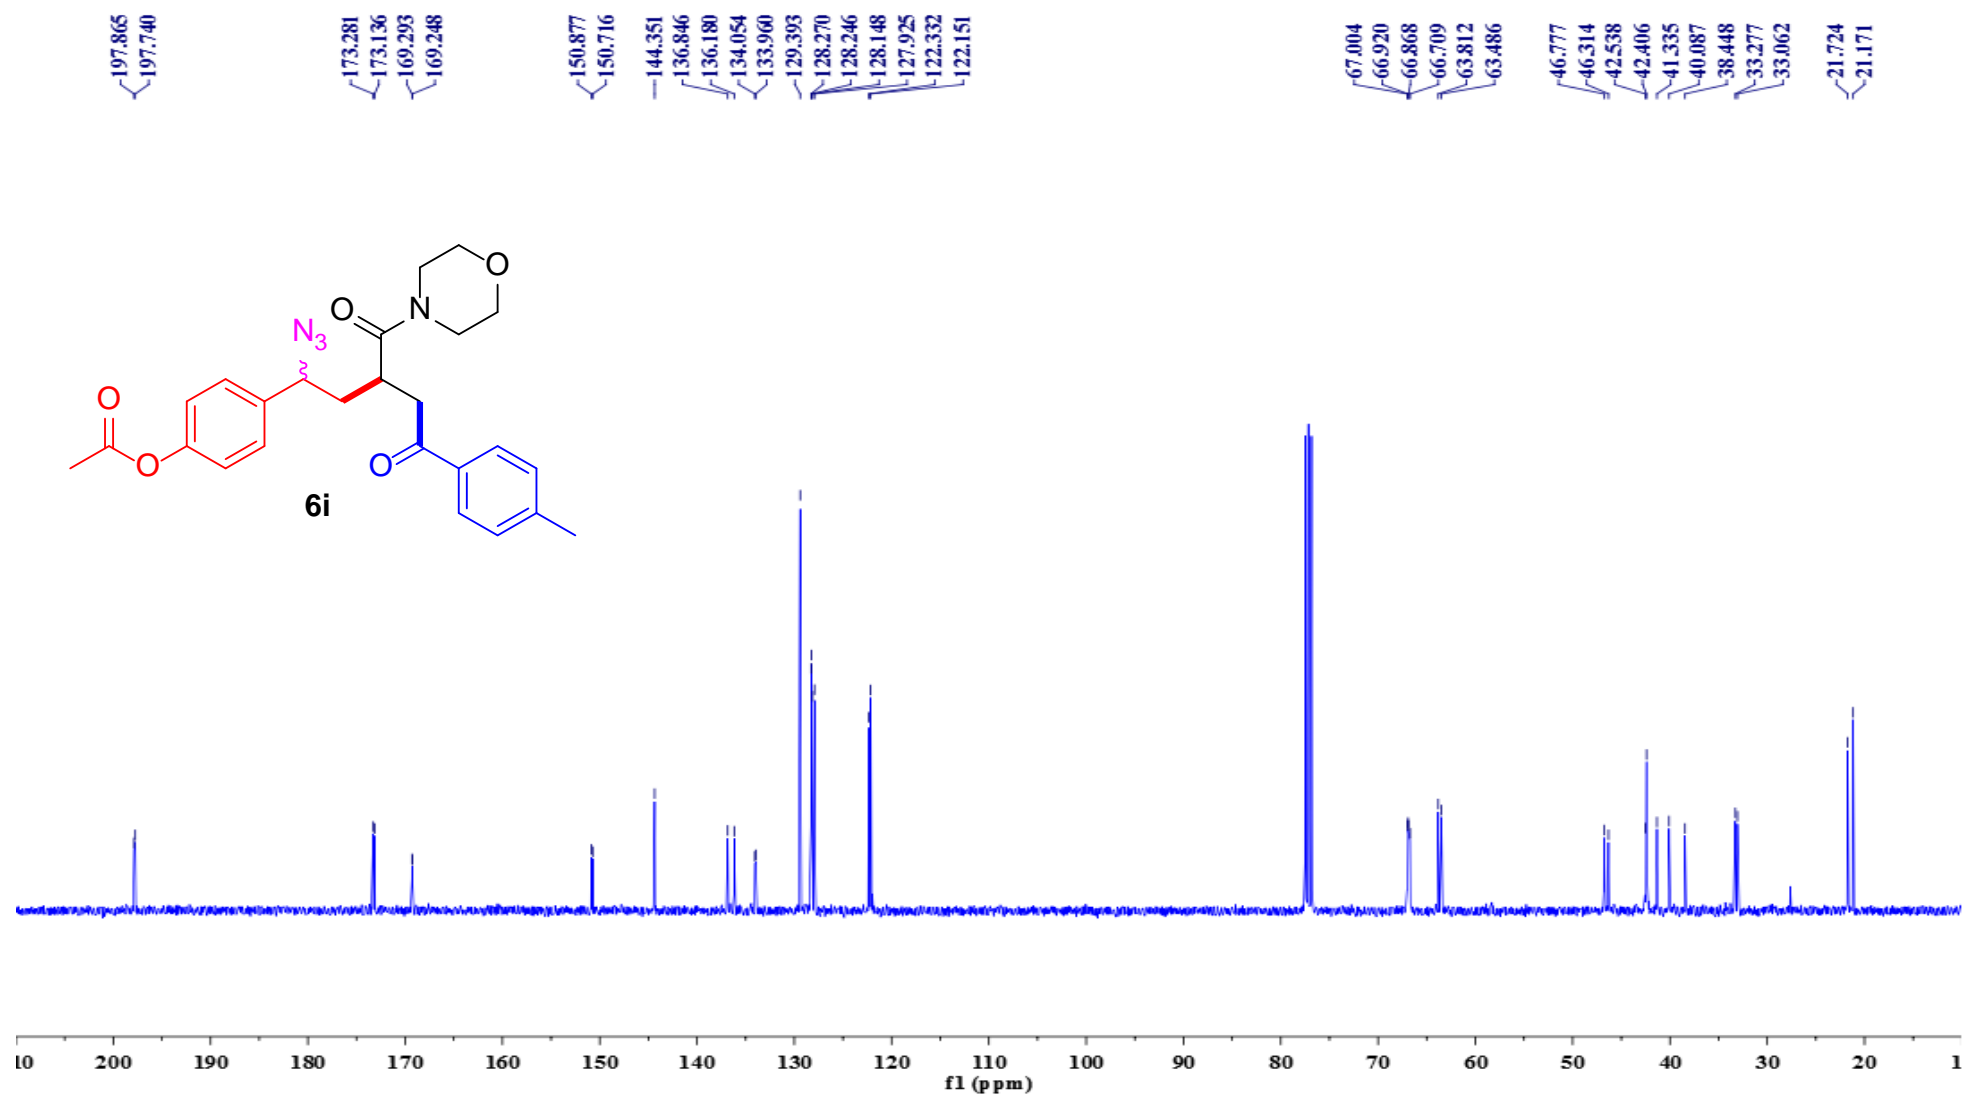

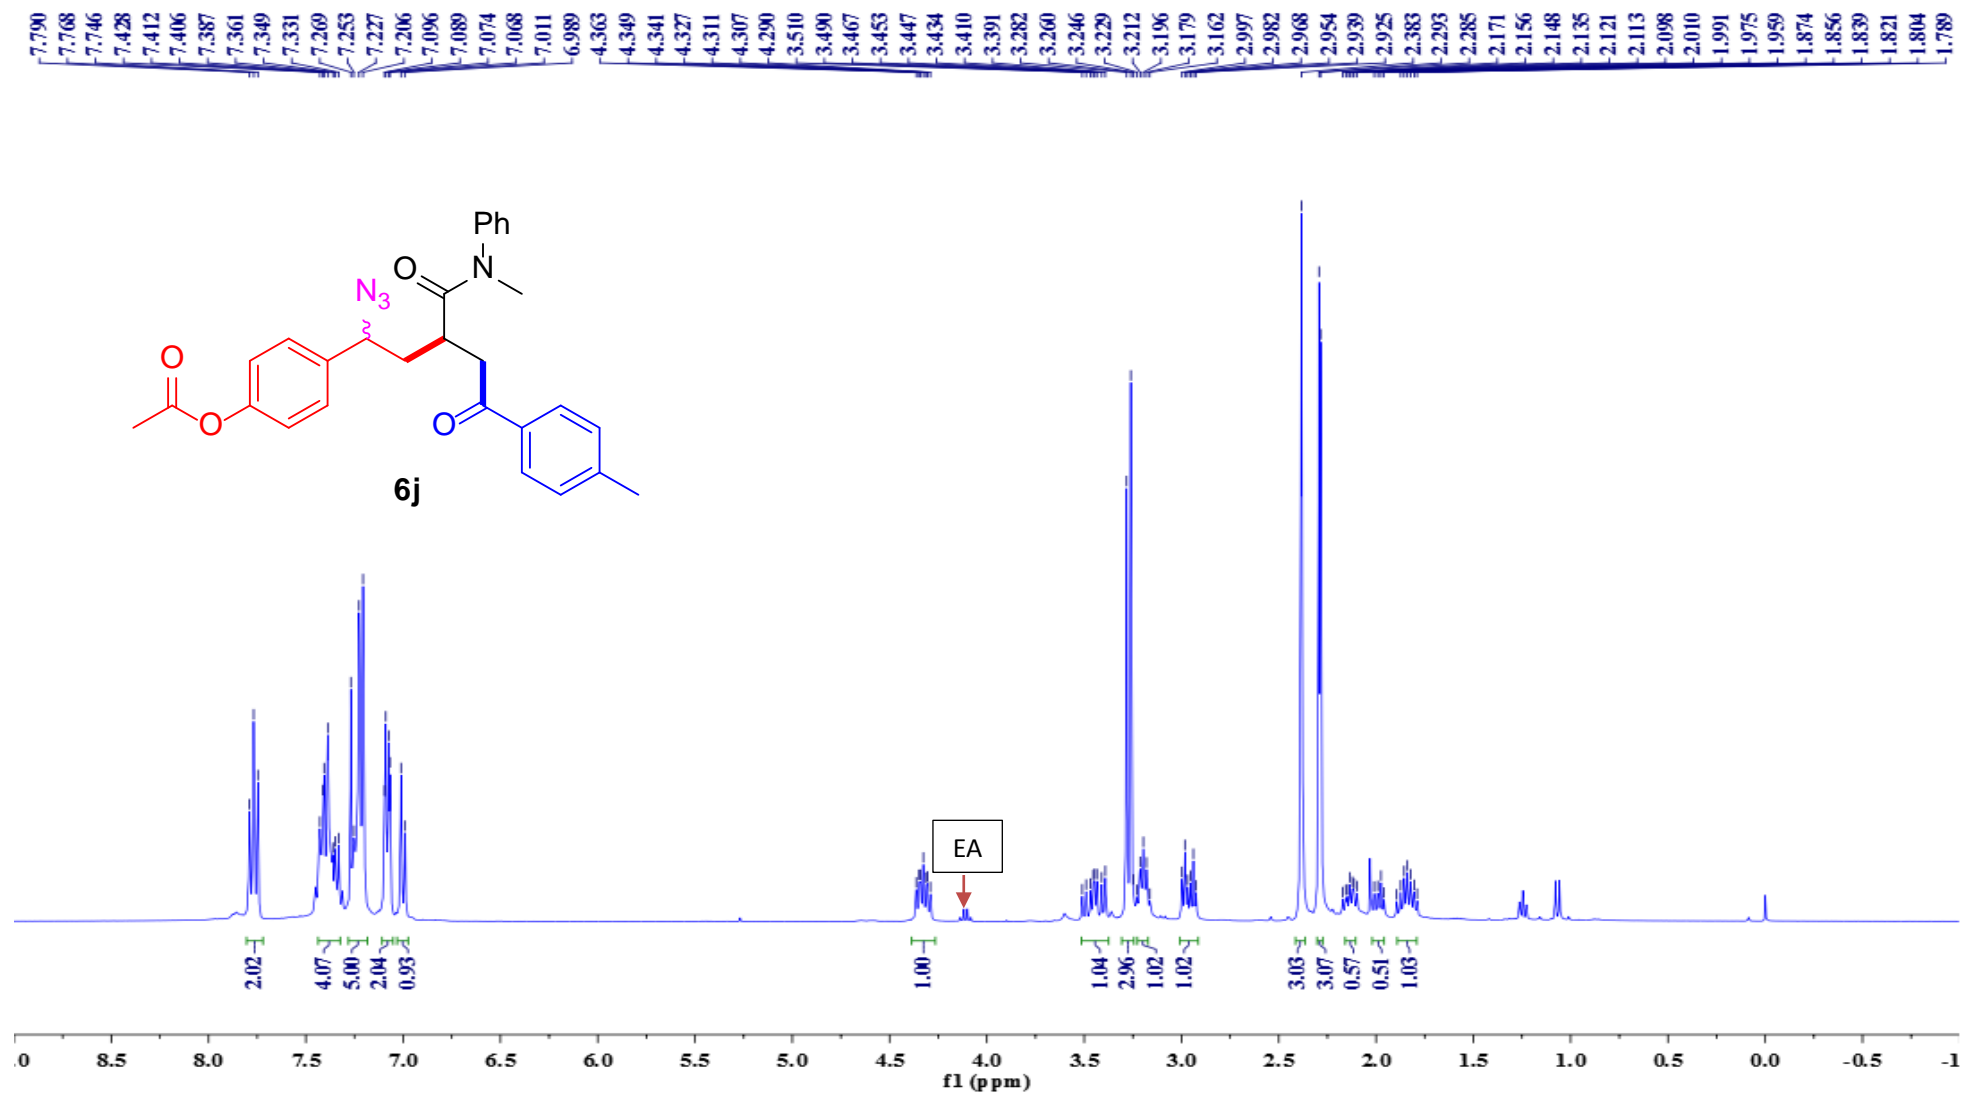

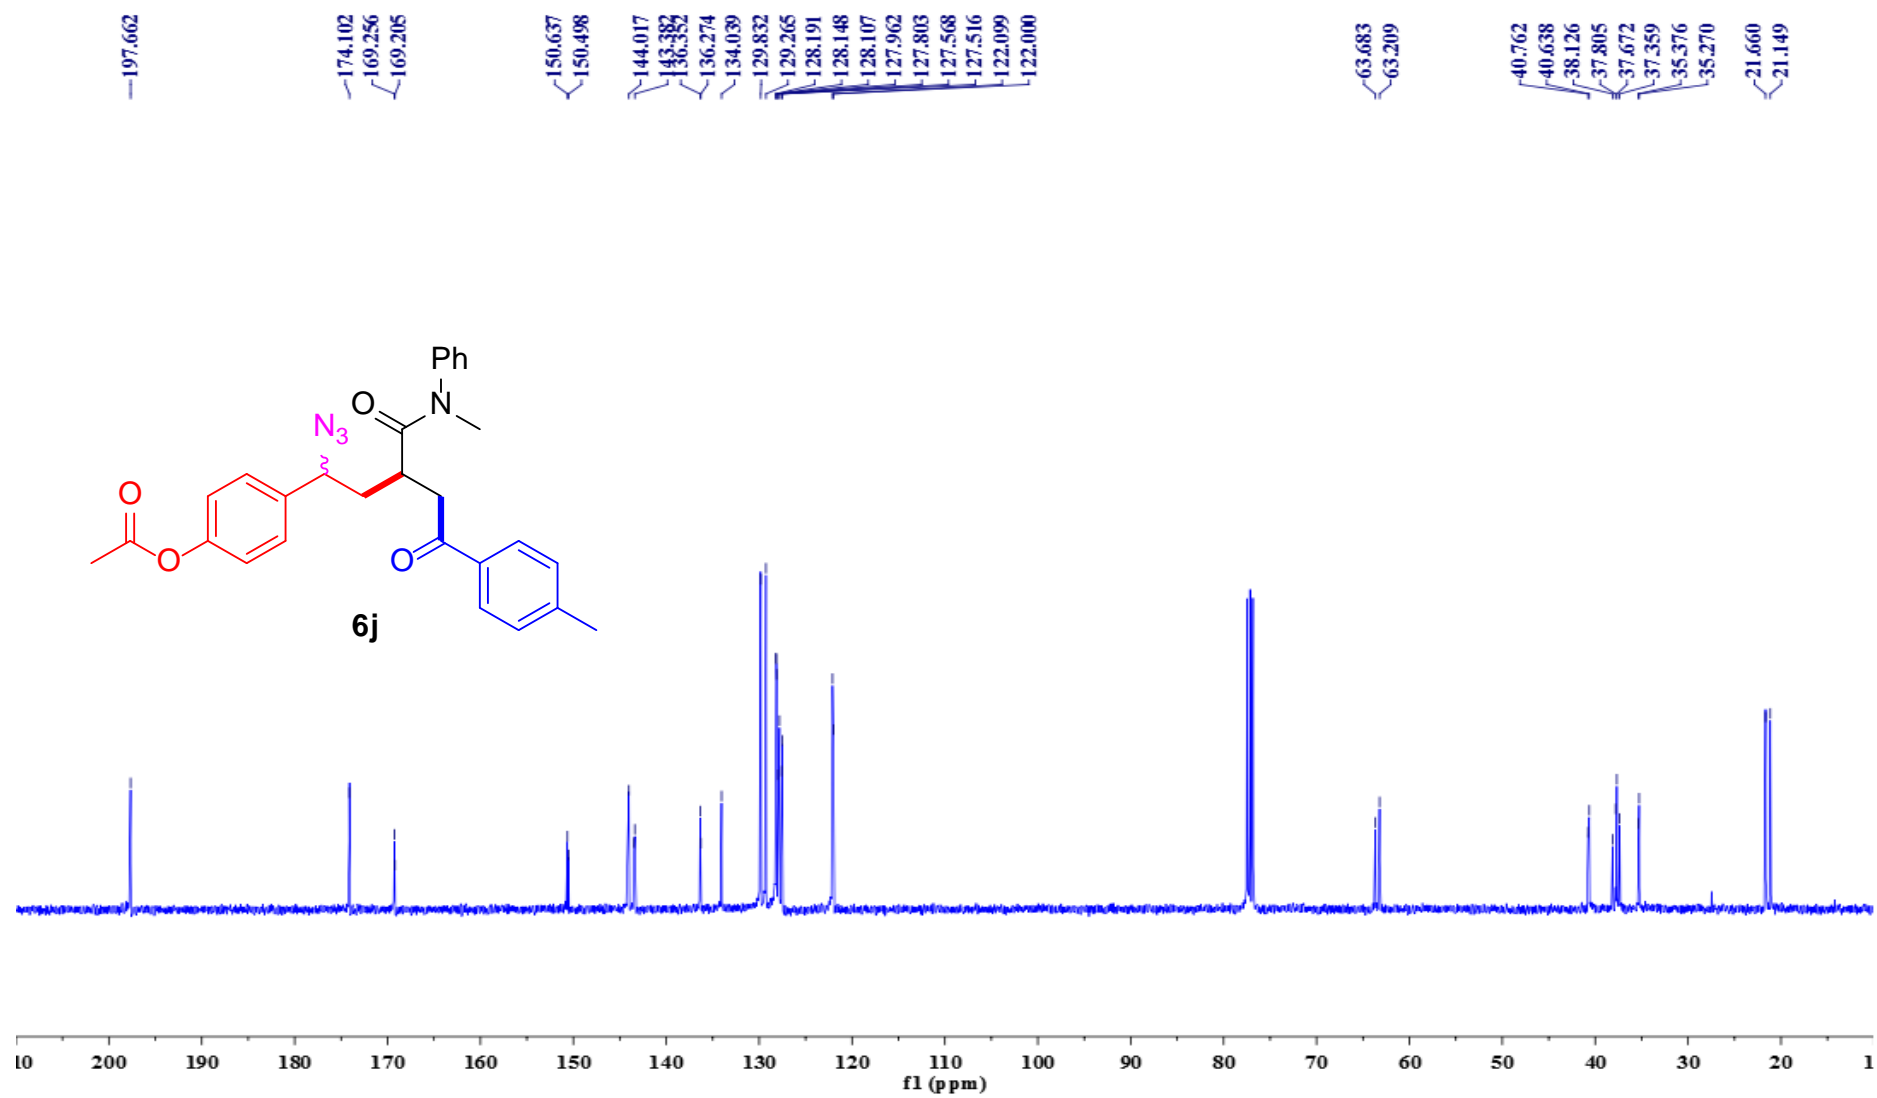



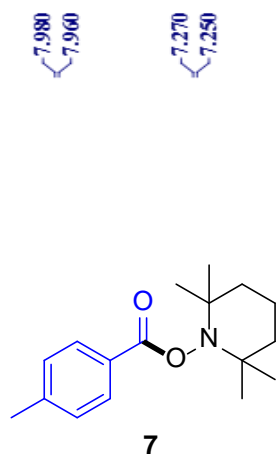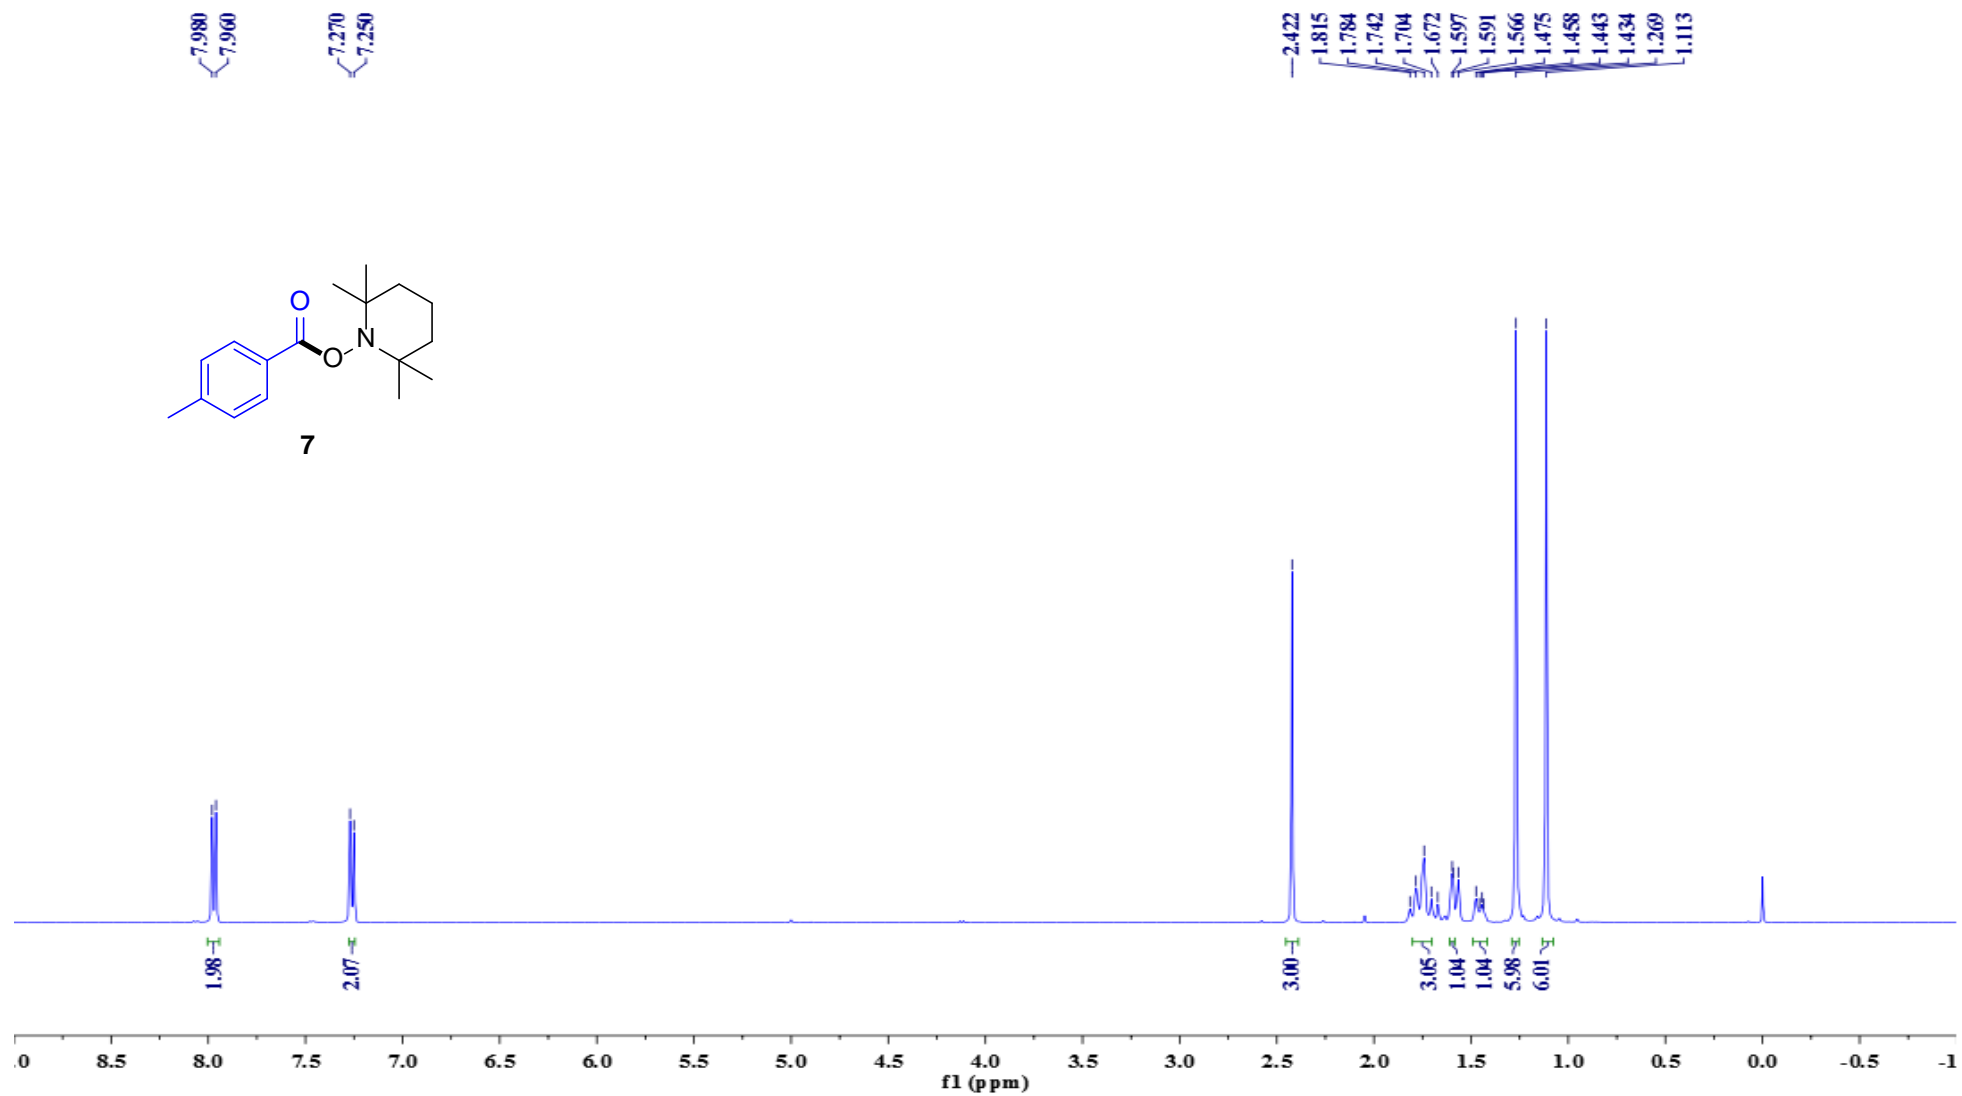

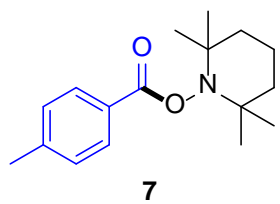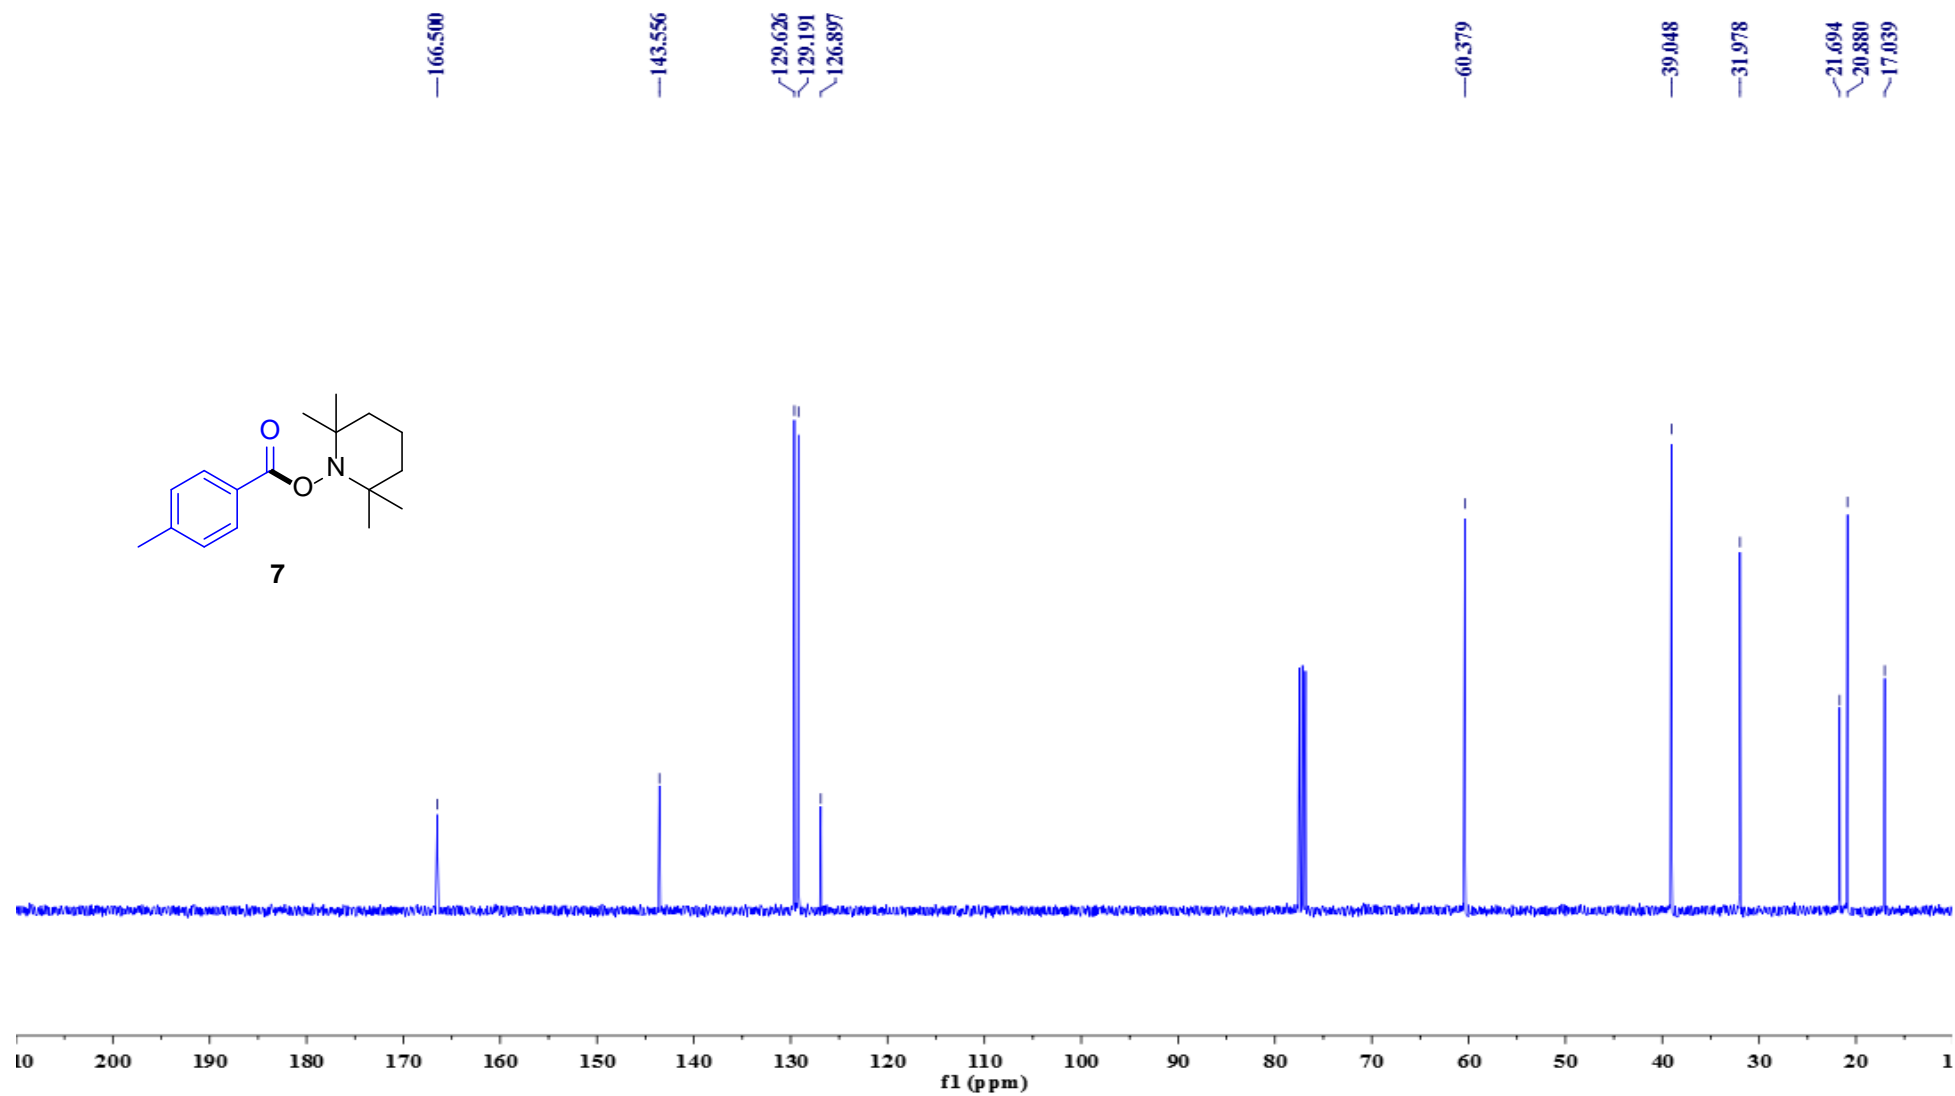

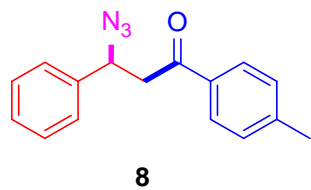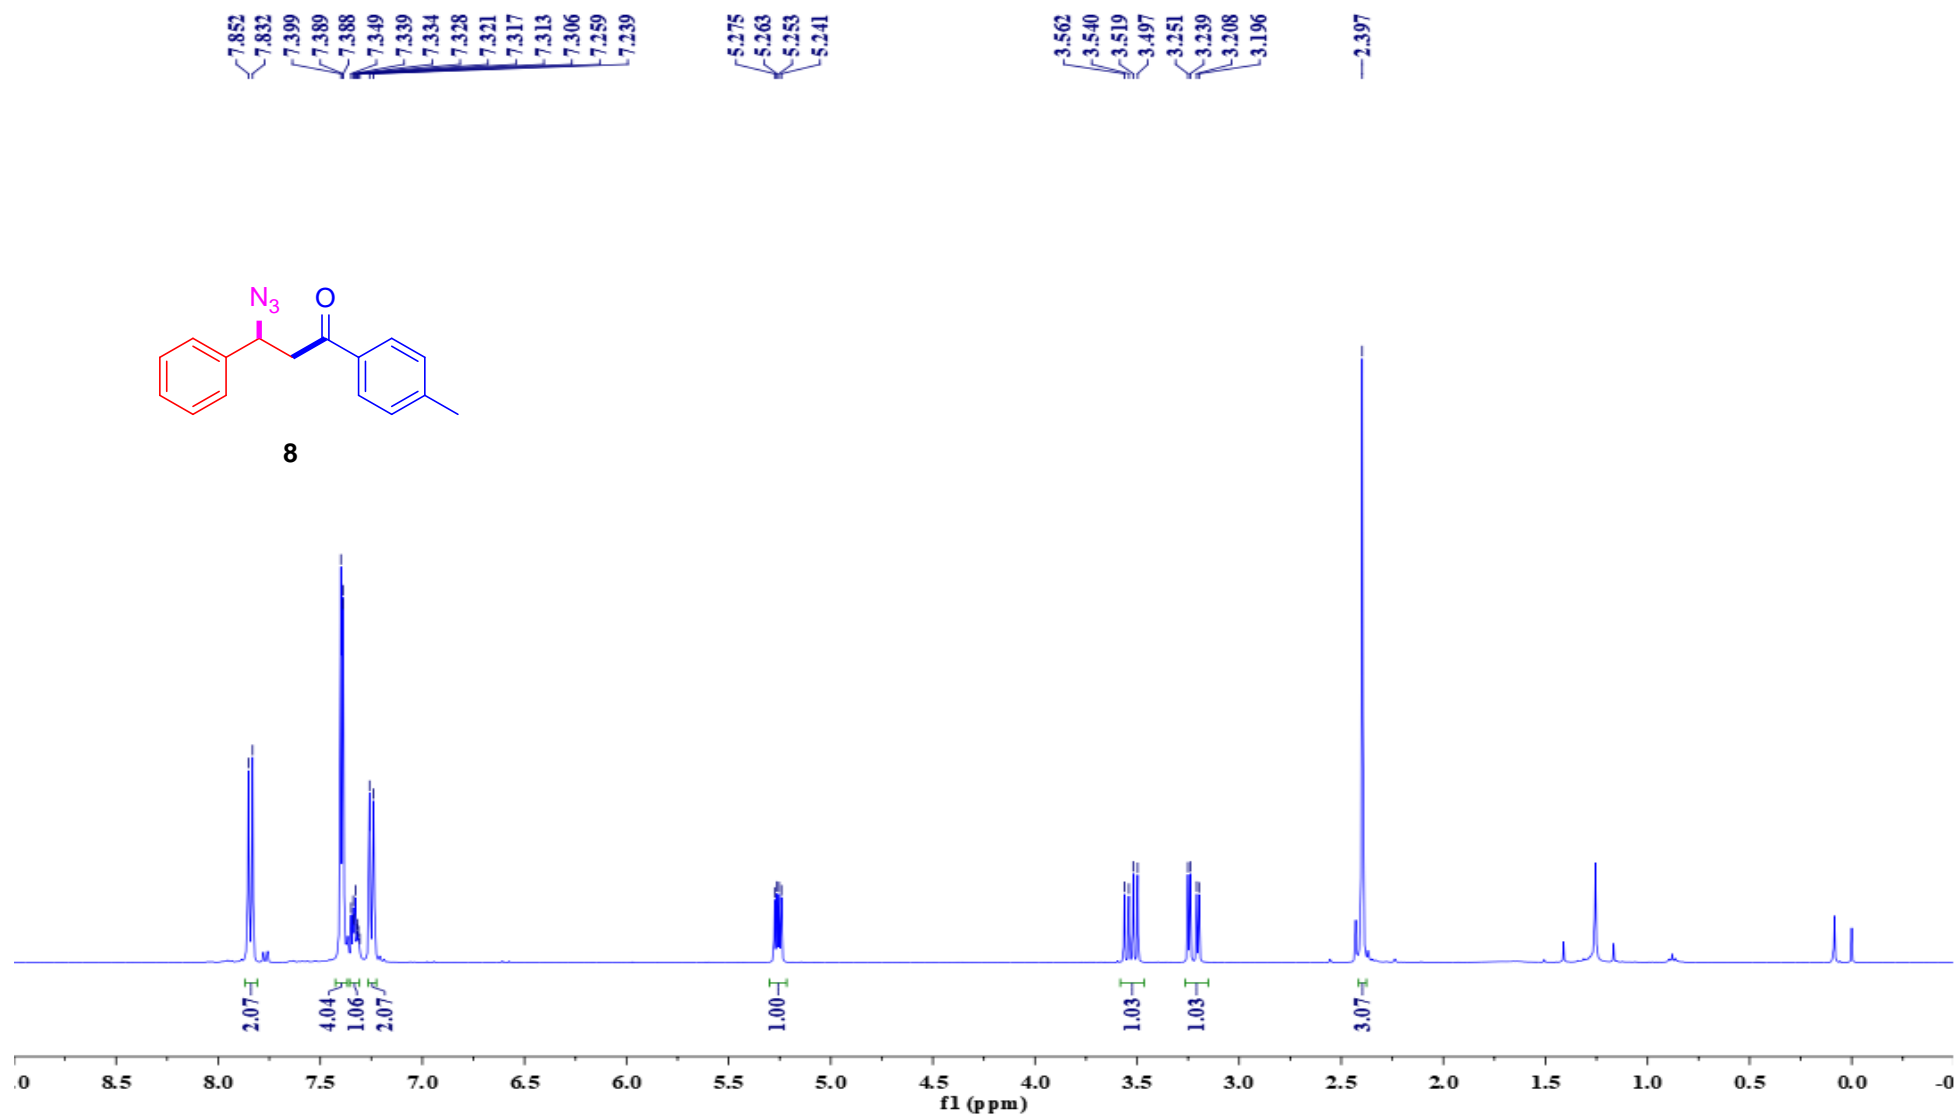

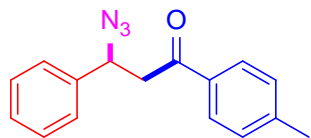

8

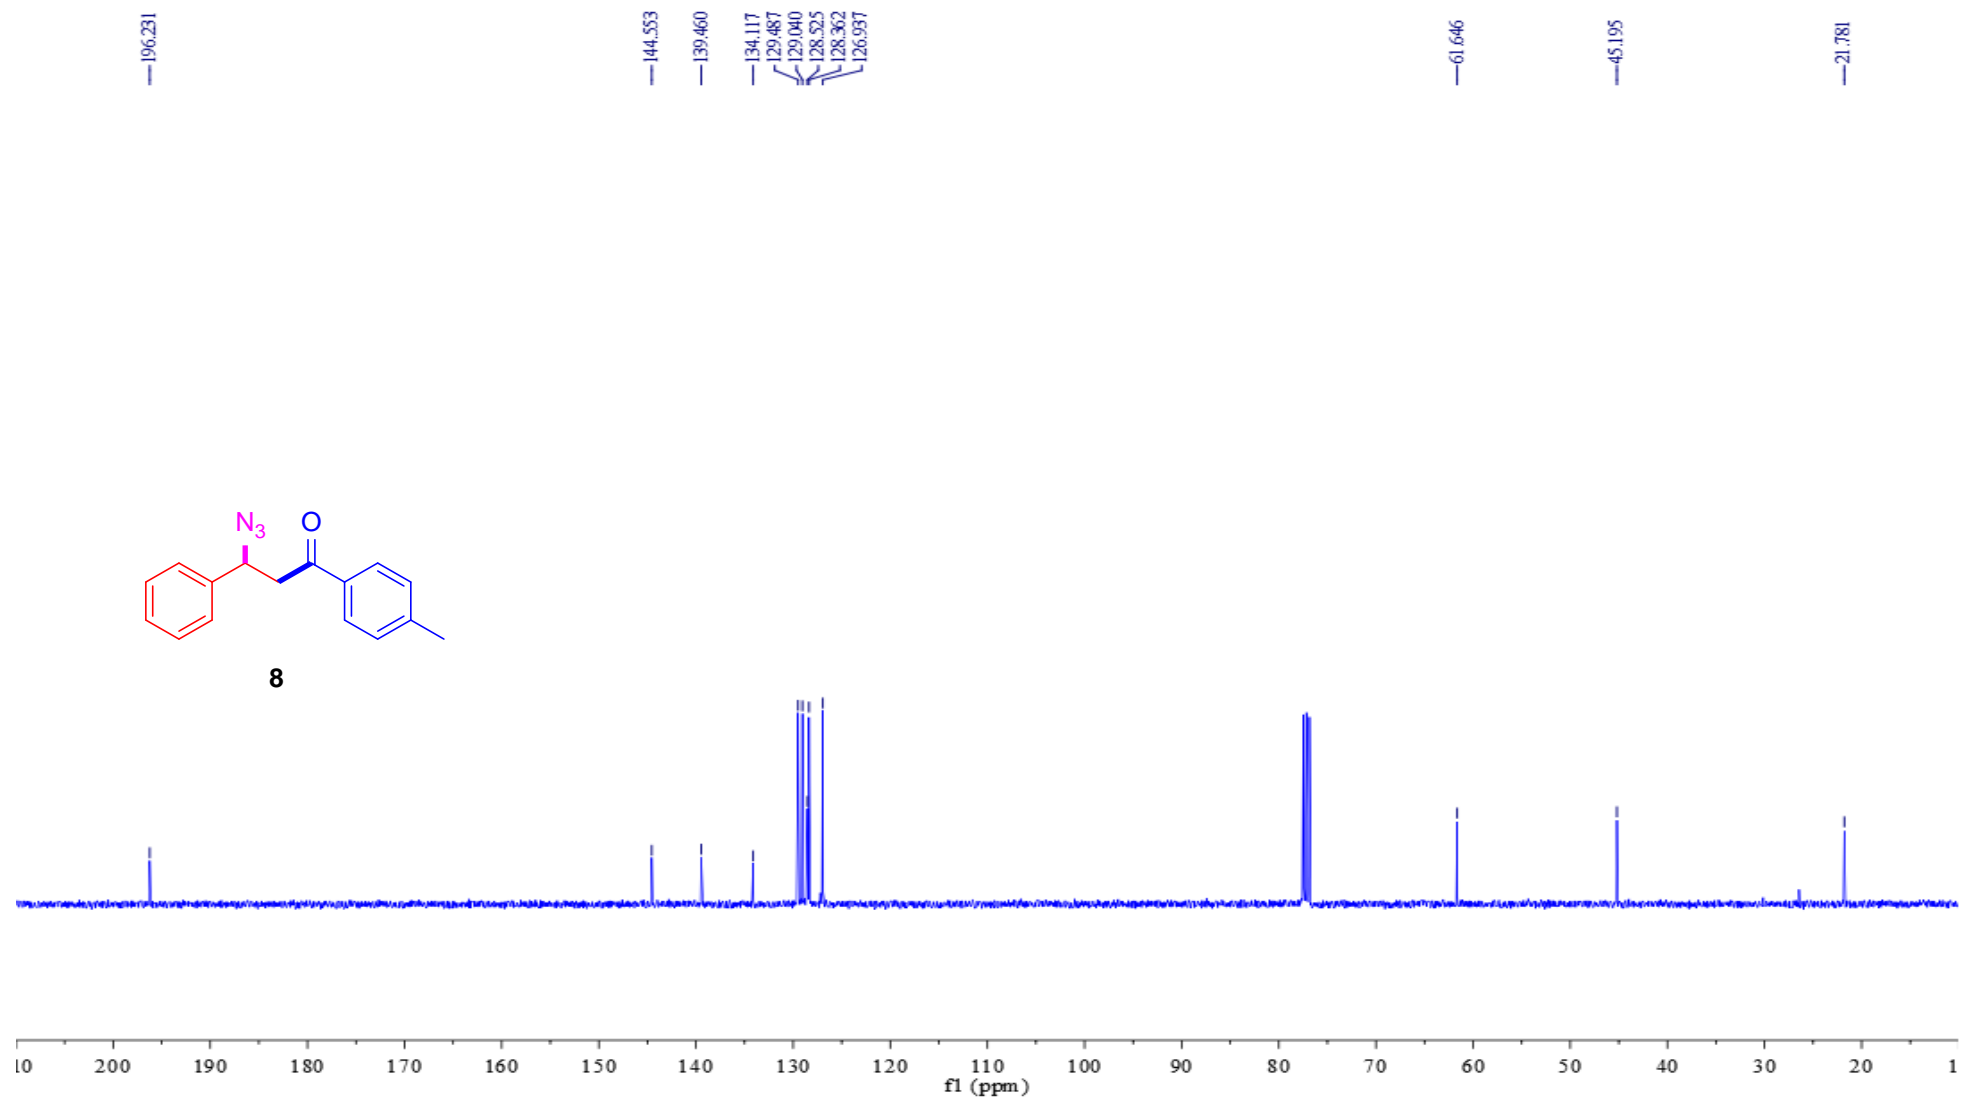

S124

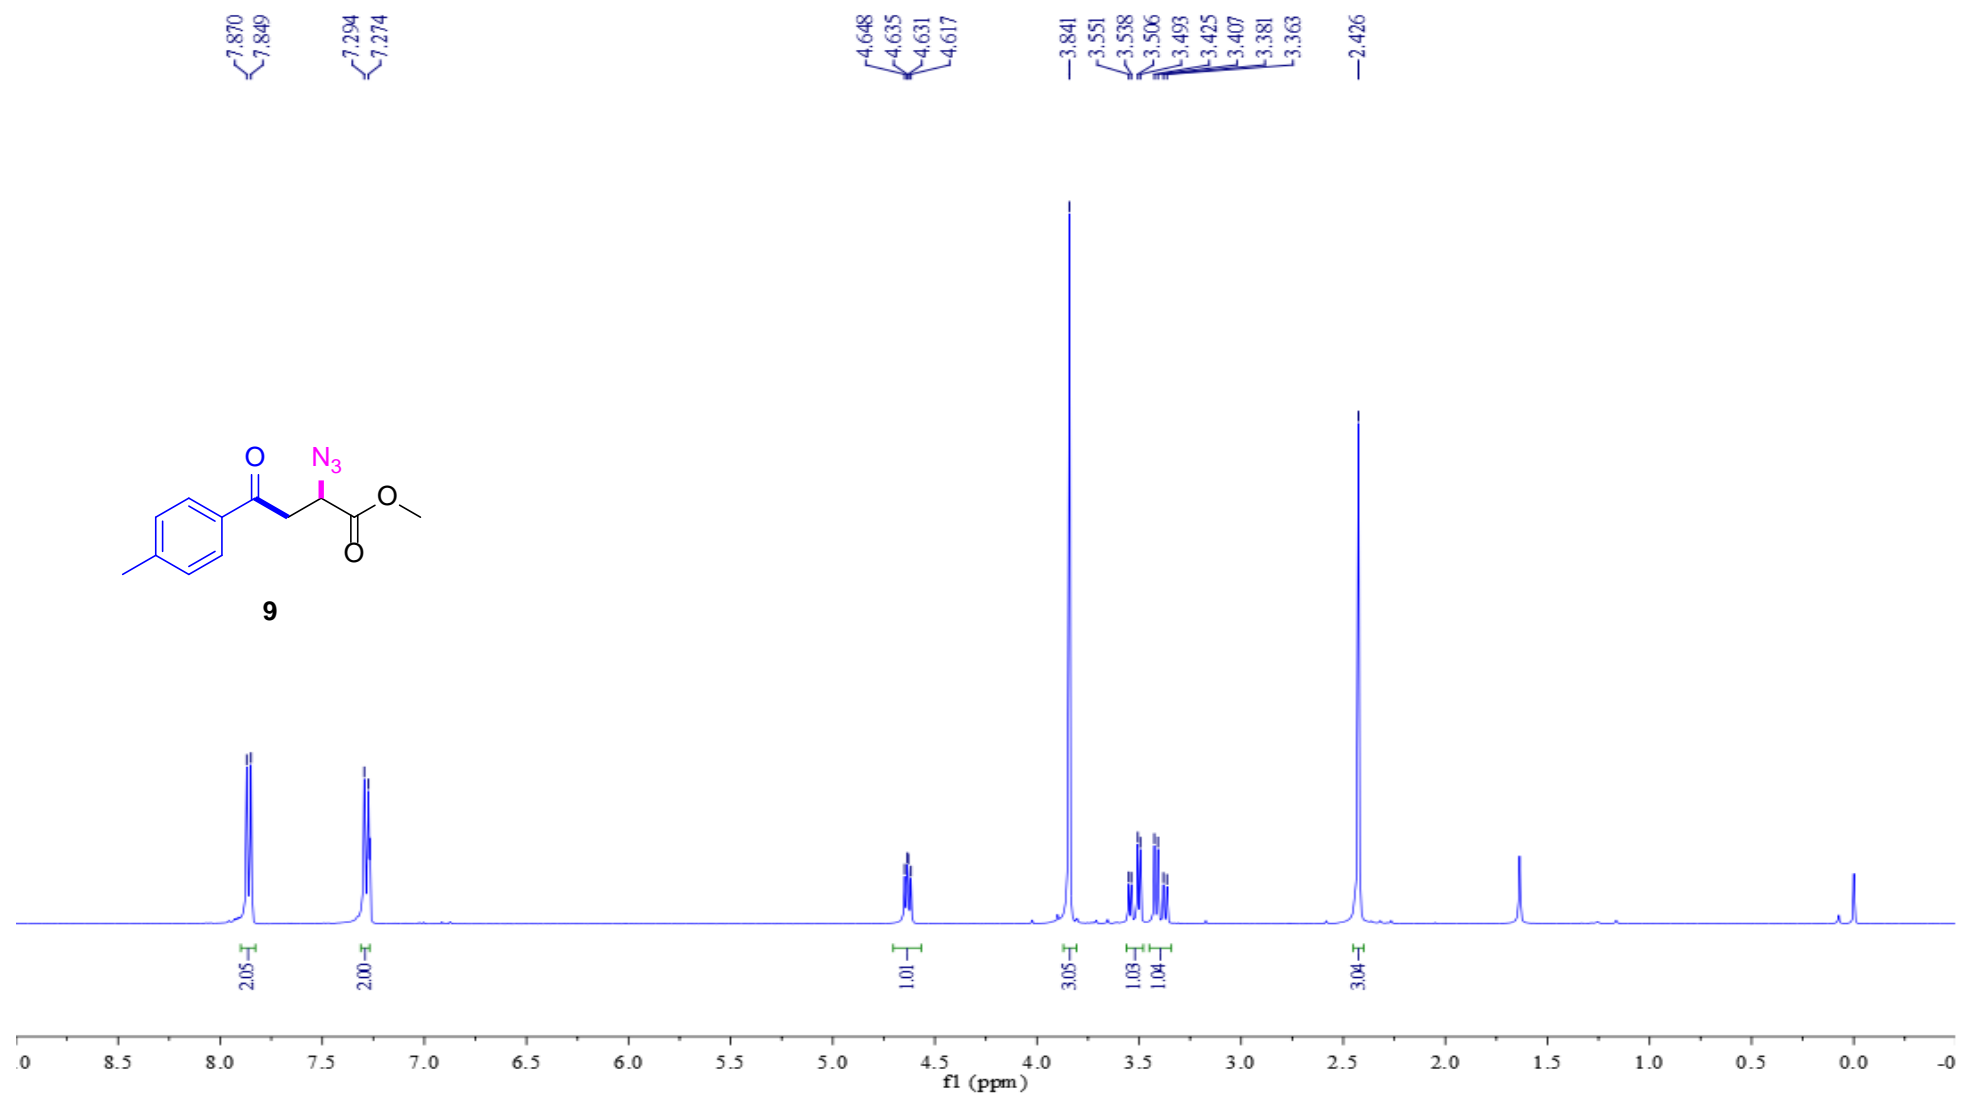

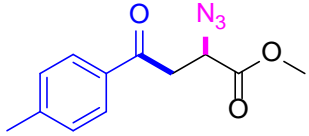

9

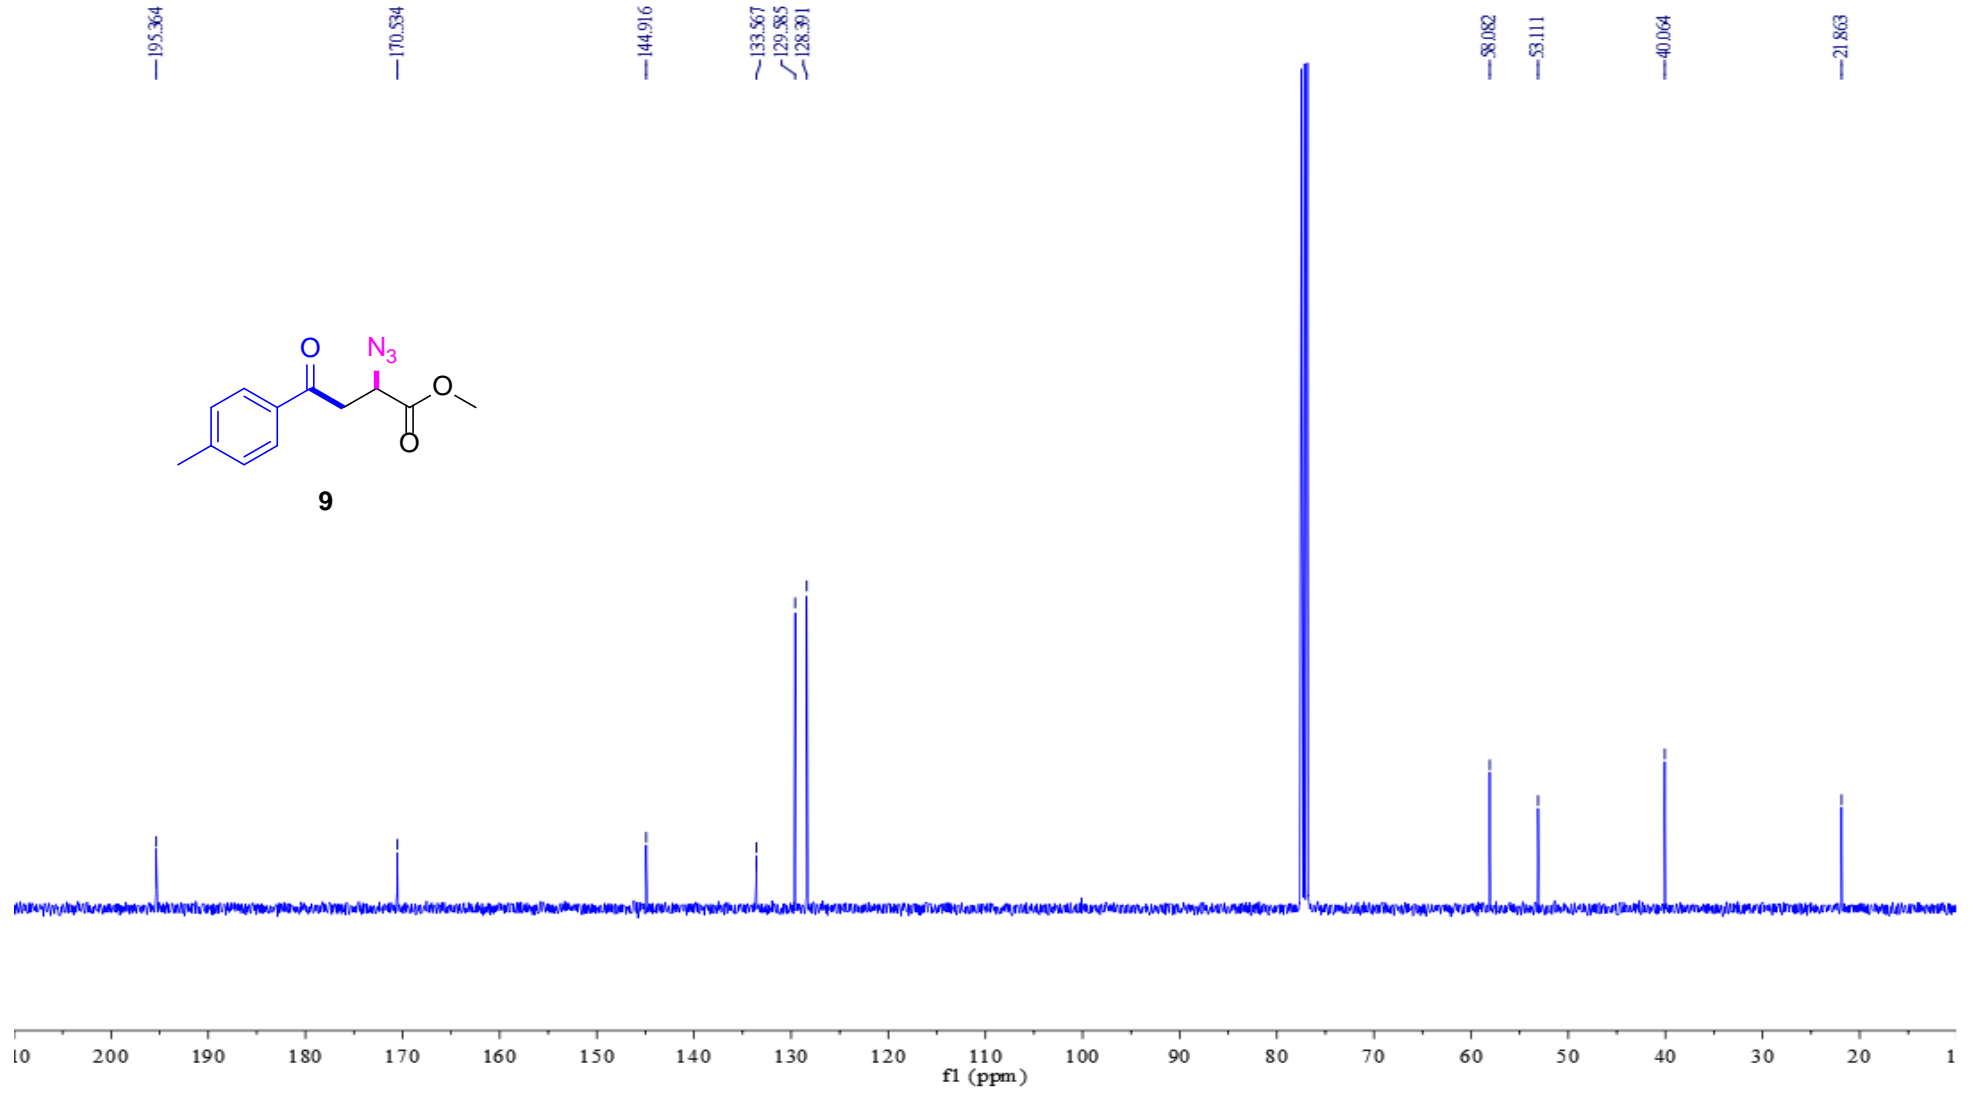

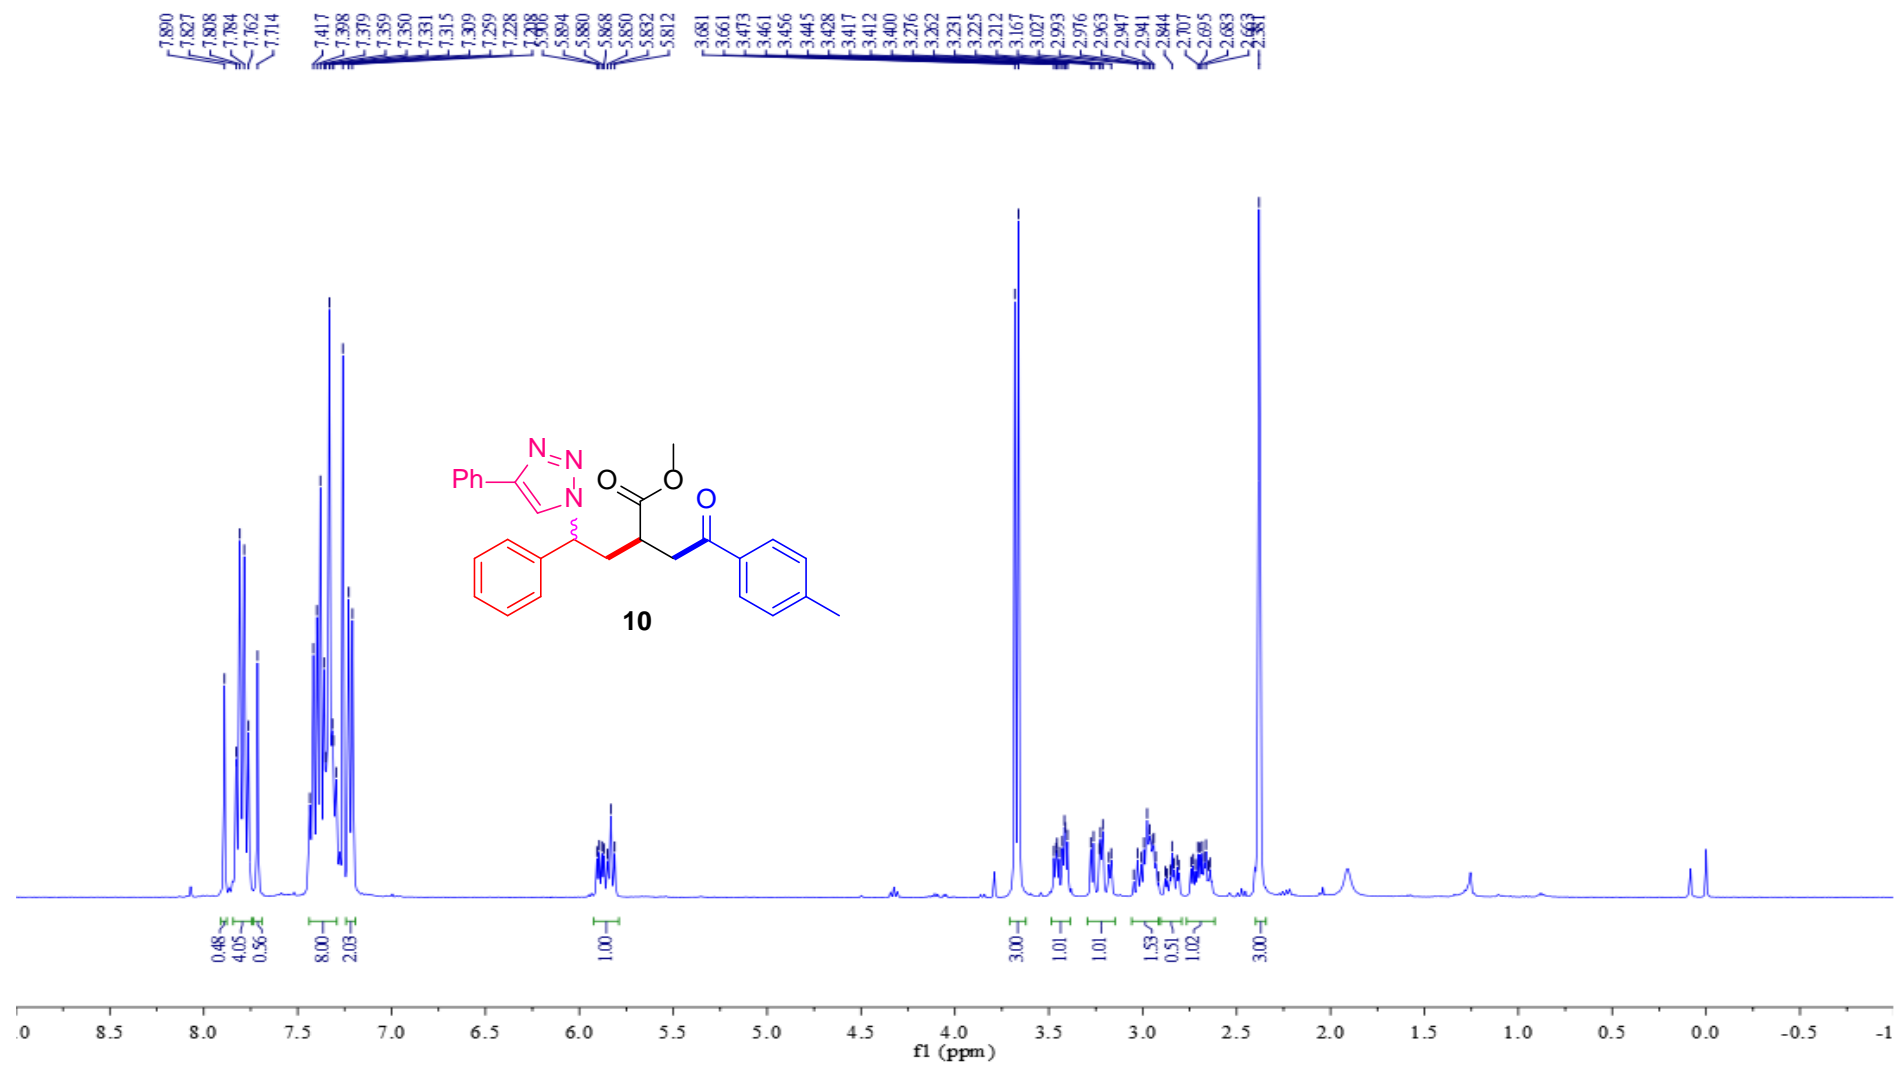

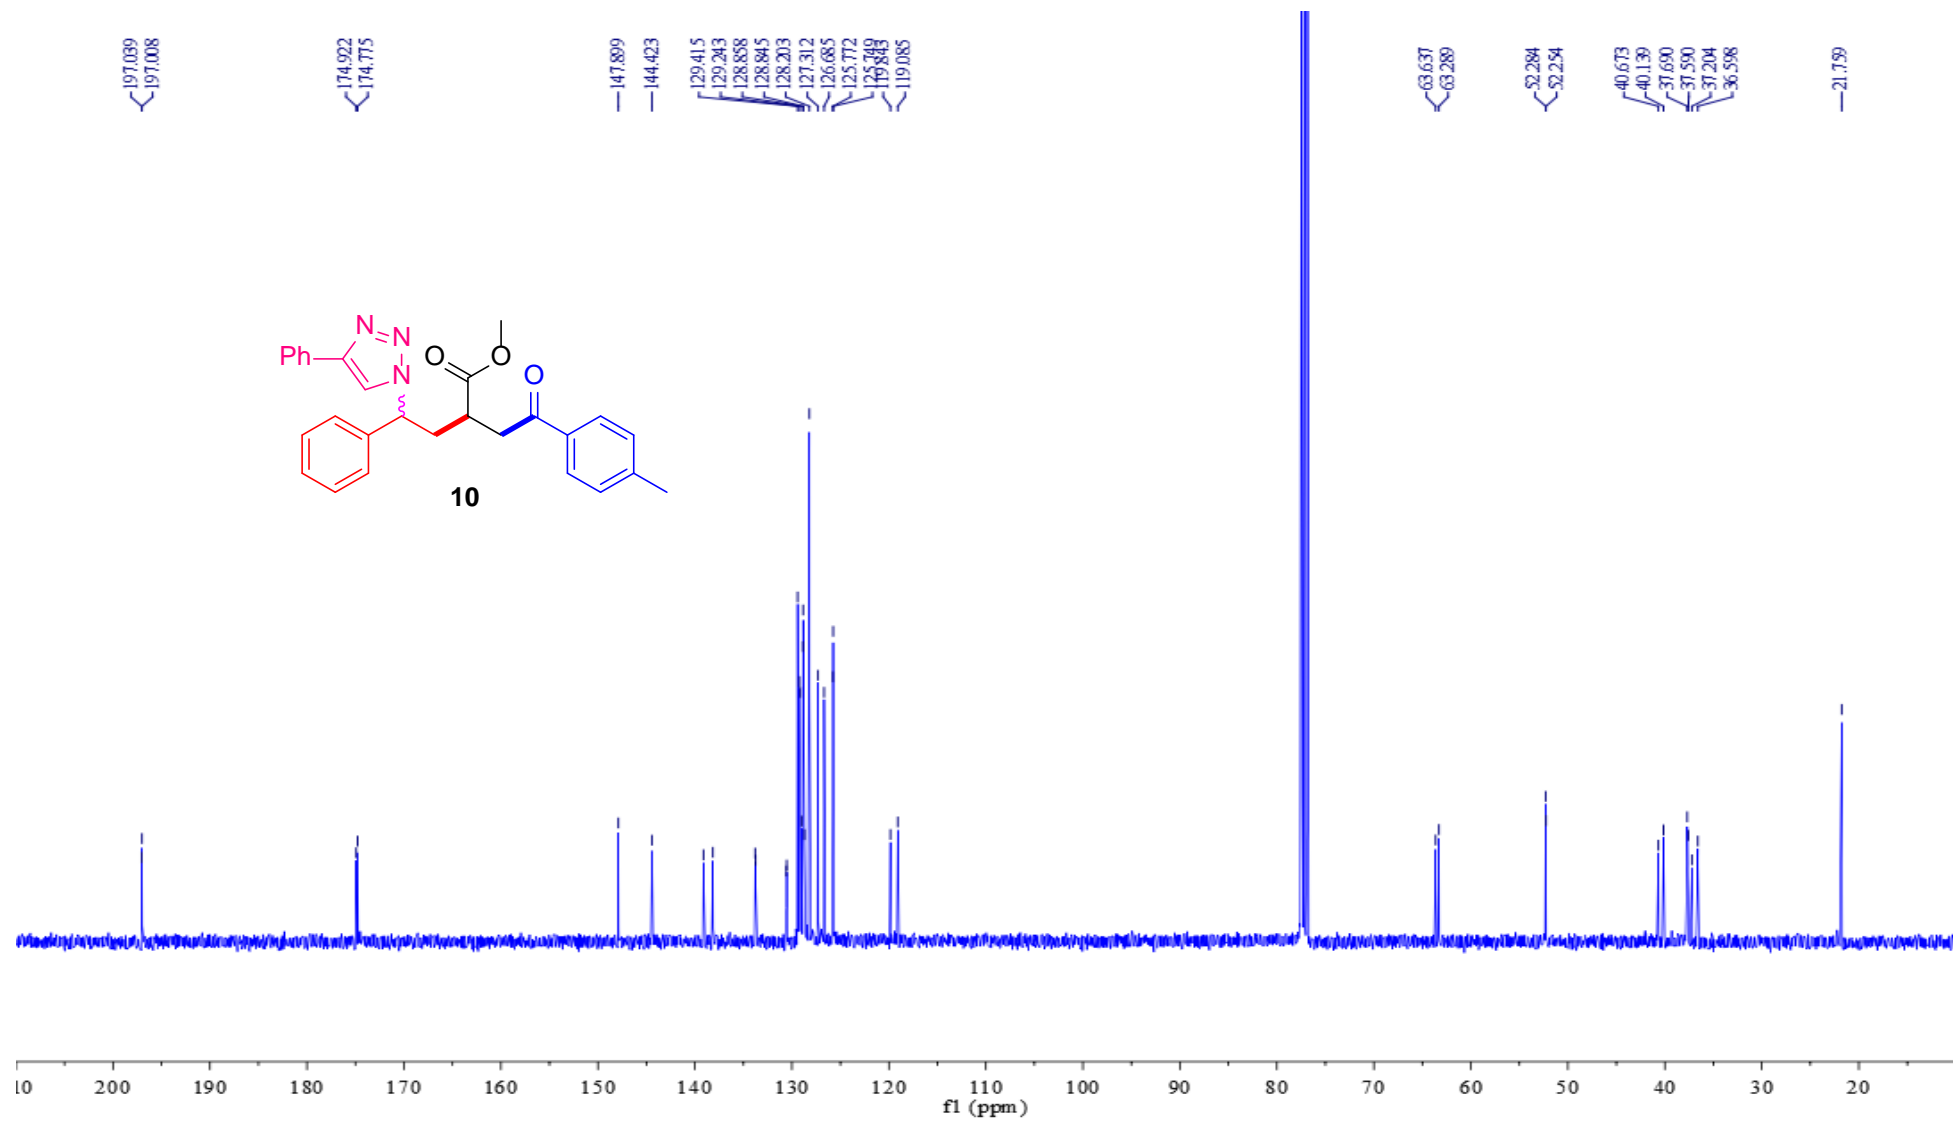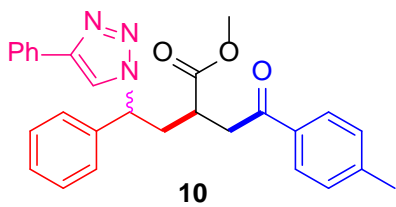



## XI. Copies of HPLC spectra of products

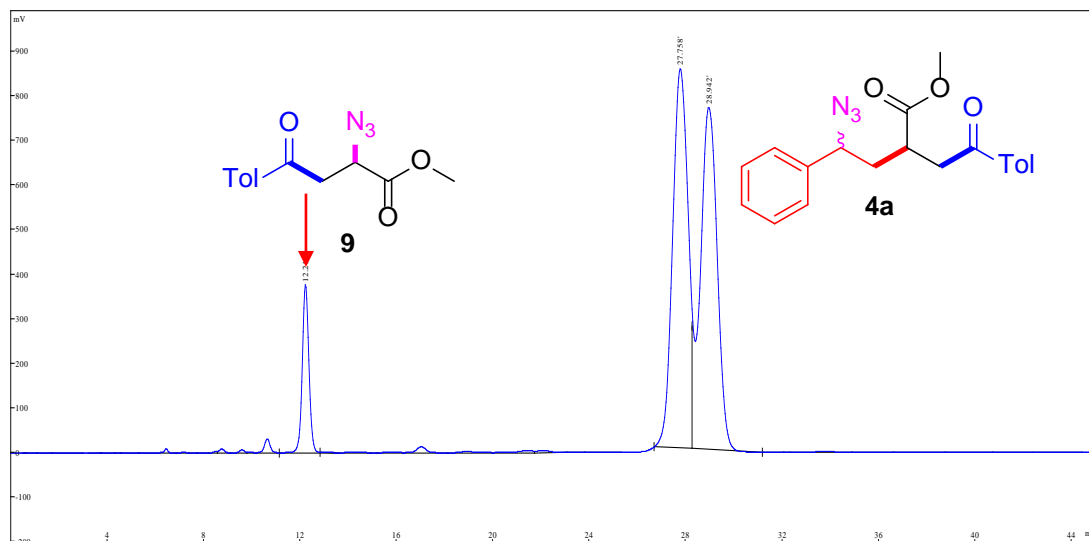

eluted by CH<sub>3</sub>CN:H<sub>2</sub>O=60:40

| 序号        | 保留时间           | 浓度              | 峰面积       |
|-----------|----------------|-----------------|-----------|
|           | retention time | peak percentage | peak area |
| 1         | 12.213         | 8.885           | 7279889   |
| 2         | 27.758         | 45.99           | 37692931  |
| 3         | 28.942         | 45.12           | 36964602  |
| 总计(total) |                | 100             | 81937422  |

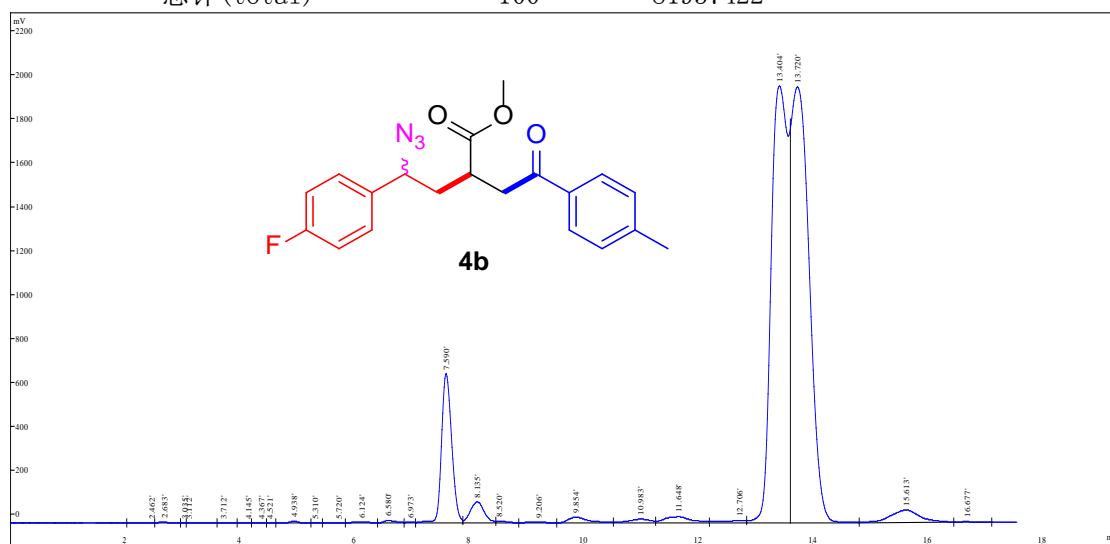

eluted by CH<sub>3</sub>CN:H<sub>2</sub>O=70:30

| 序号 | 保留时间   | 名称 | 浓度    | 峰面积      |
|----|--------|----|-------|----------|
| 23 | 13.404 |    | 42.94 | 42777120 |
| 24 | 13.720 |    | 41.73 | 41576198 |

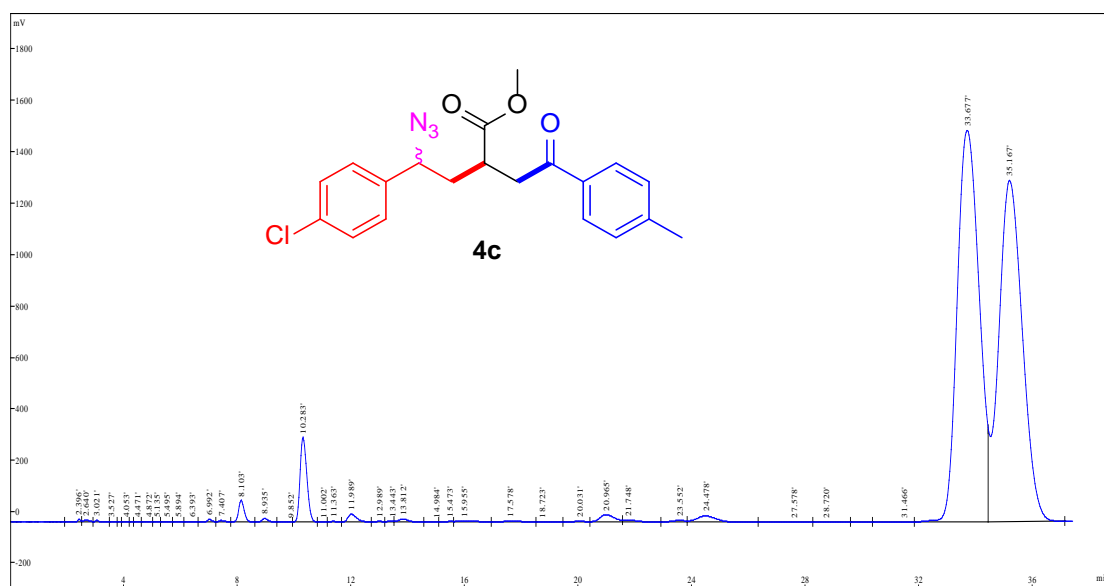

eluted by CH<sub>3</sub>CN:H<sub>2</sub>O=60:40

| 序号 | 保留时间   | 名称 | 浓度    | 峰面积      |
|----|--------|----|-------|----------|
| 37 | 33.677 |    | 48.19 | 82215123 |
| 38 | 35.167 |    | 44.1  | 75243974 |

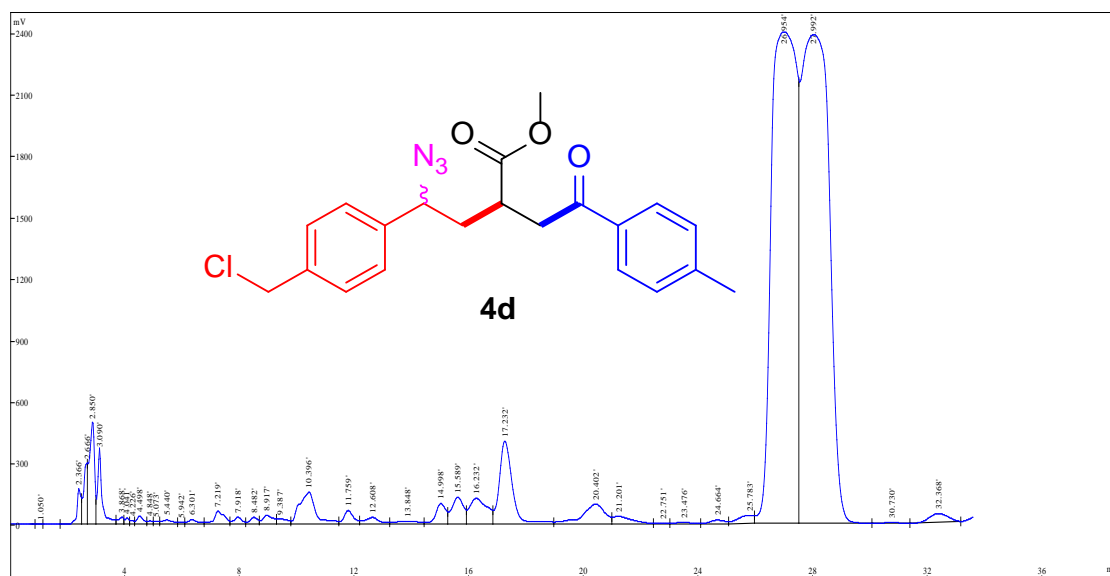

eluted by CH<sub>3</sub>CN:H<sub>2</sub>O=60:40

| 序号 | 保留时间   | 名称 | 浓度    | 峰面积       |
|----|--------|----|-------|-----------|
| 34 | 26.954 |    | 39.83 | 150429619 |
| 35 | 27.992 |    | 41.87 | 158133683 |

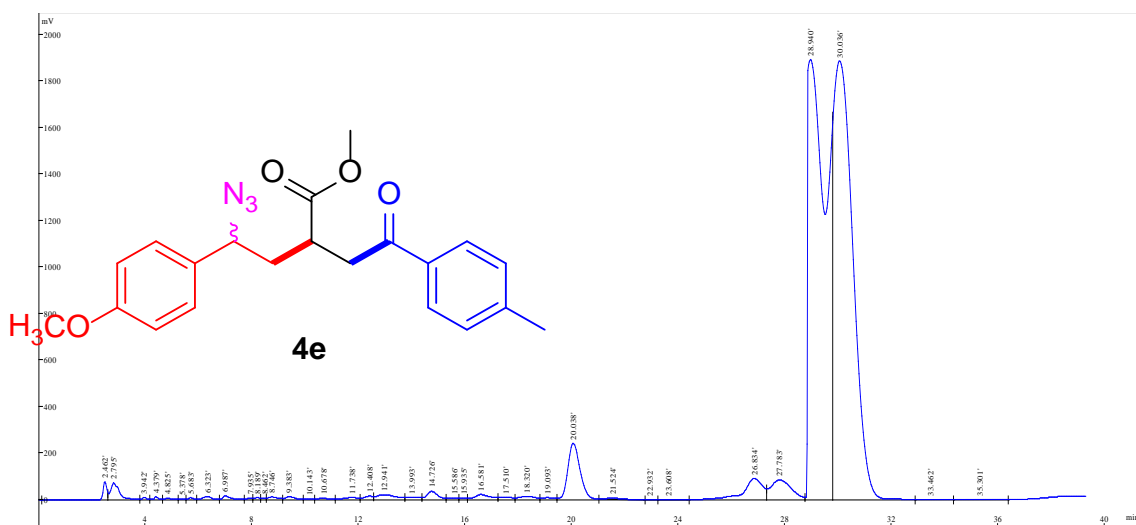

eluted by CH<sub>3</sub>CN:H<sub>2</sub>O=50:50

| 序号 | 保留时间   | 名称 | 浓度    | 峰面积      |
|----|--------|----|-------|----------|
| 34 | 28.940 |    | 42.54 | 90164819 |
| 35 | 30.036 |    | 43.61 | 92466362 |

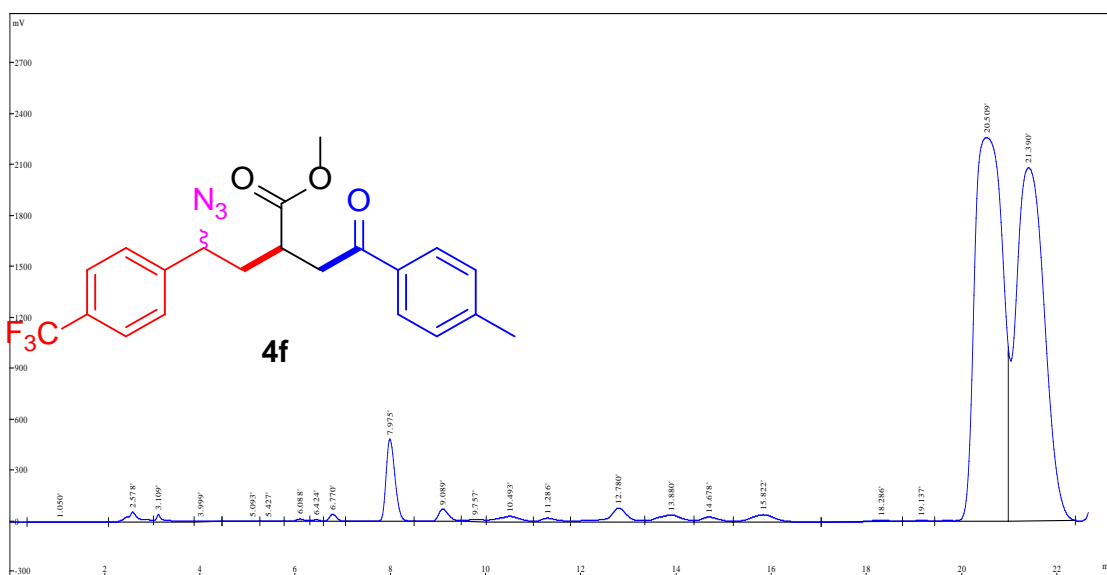

eluted by CH<sub>3</sub>CN:H<sub>2</sub>O=60:40

| 序号 | 保留时间   | 名称 | 浓度    | 峰面积      |
|----|--------|----|-------|----------|
| 21 | 20.509 |    | 46.36 | 90872966 |
| 22 | 21.390 |    | 44.44 | 87113005 |

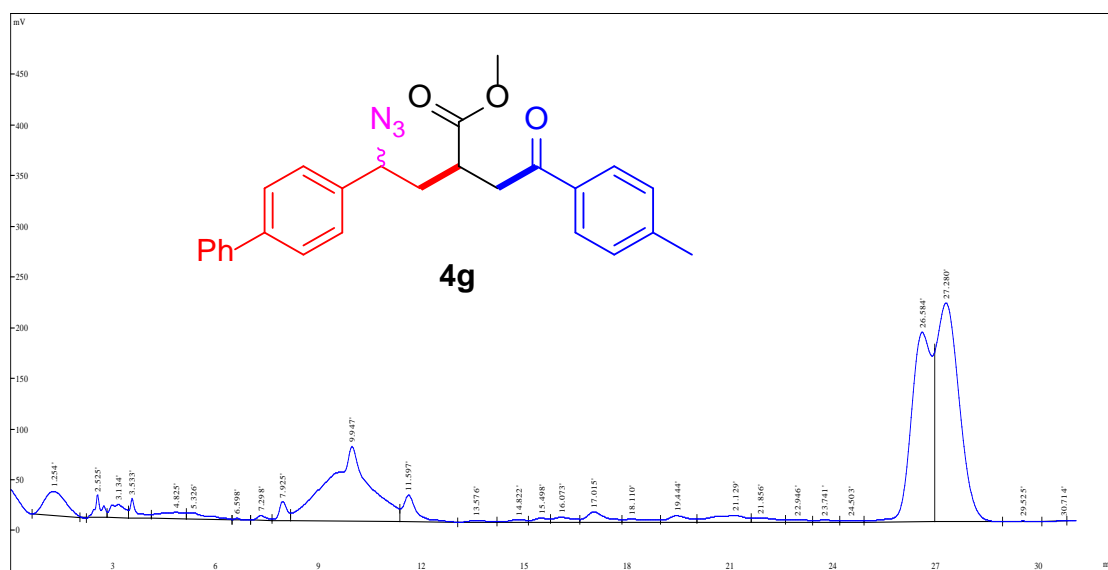

eluted by CH3CN:H2O=60:40

| 序号 | 保留时间   | 名称 | 浓度    | 峰面积     |
|----|--------|----|-------|---------|
| 24 | 26.584 |    | 27.66 | 8244071 |
| 25 | 27.280 |    | 31.96 | 9523237 |

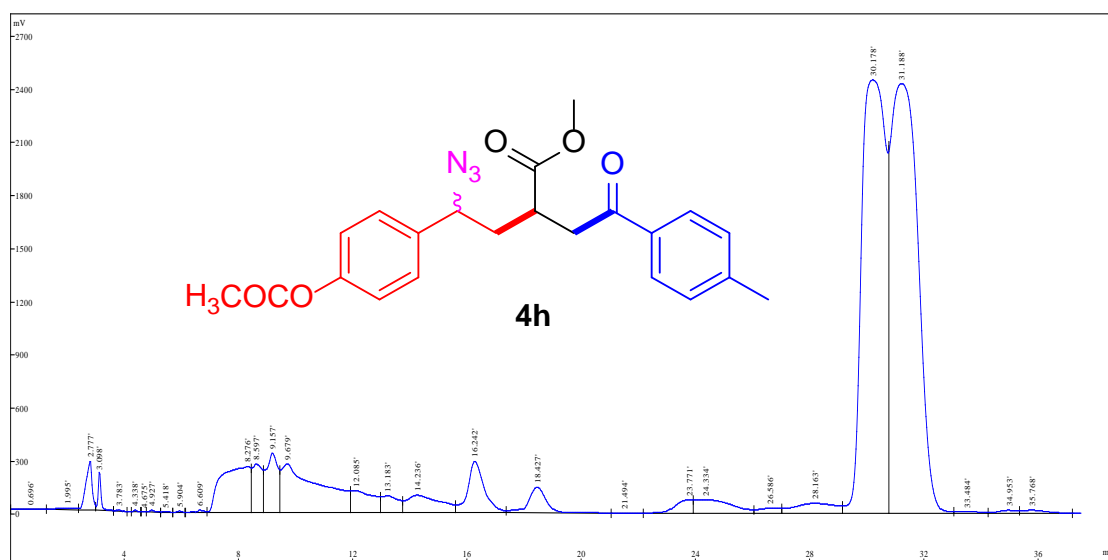

eluted by CH3CN:H2O=50:50

| 序号 | 保留时间   | 名称 | 浓度    | 峰面积       |
|----|--------|----|-------|-----------|
| 26 | 30.178 |    | 34.24 | 148424602 |
| 27 | 31.188 |    | 35.92 | 155720858 |

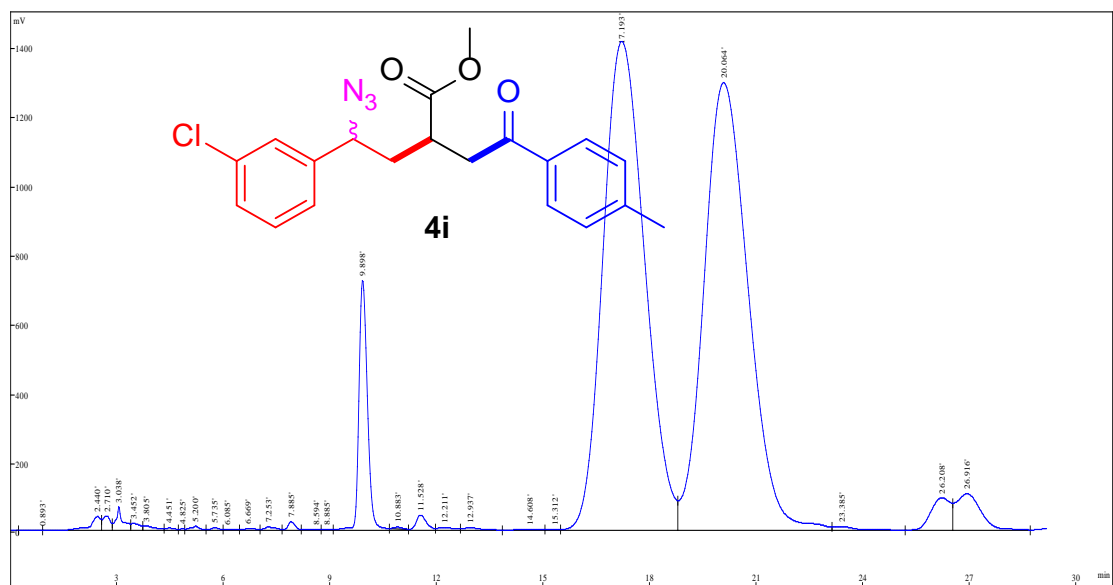

eluted by CH<sub>3</sub>CN:H<sub>2</sub>O=70:30

| 序号 | 保留时间   | 名称 | 浓度    | 峰面积       |
|----|--------|----|-------|-----------|
| 24 | 17.193 |    | 45.2  | 114895514 |
| 25 | 20.064 |    | 43.81 | 111353958 |

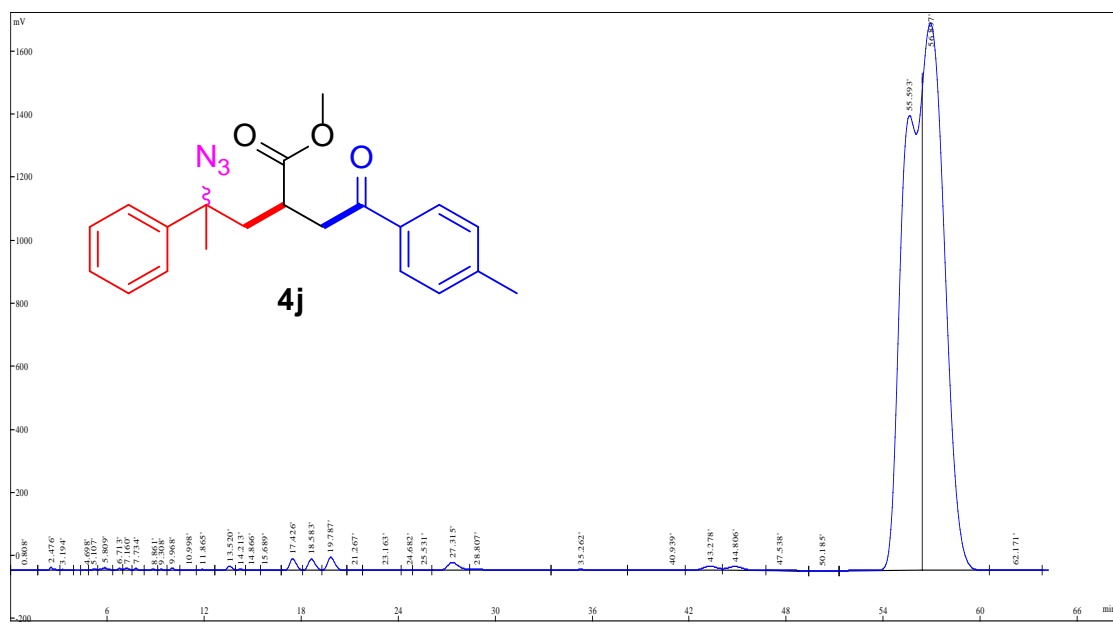

eluted by CH<sub>3</sub>CN:H<sub>2</sub>O=50:50

| 序号 | 保留时间   | 名称 | 浓度    | 峰面积       |
|----|--------|----|-------|-----------|
| 34 | 55.593 |    | 41.92 | 126548851 |
| 35 | 56.897 |    | 50.7  | 153045094 |

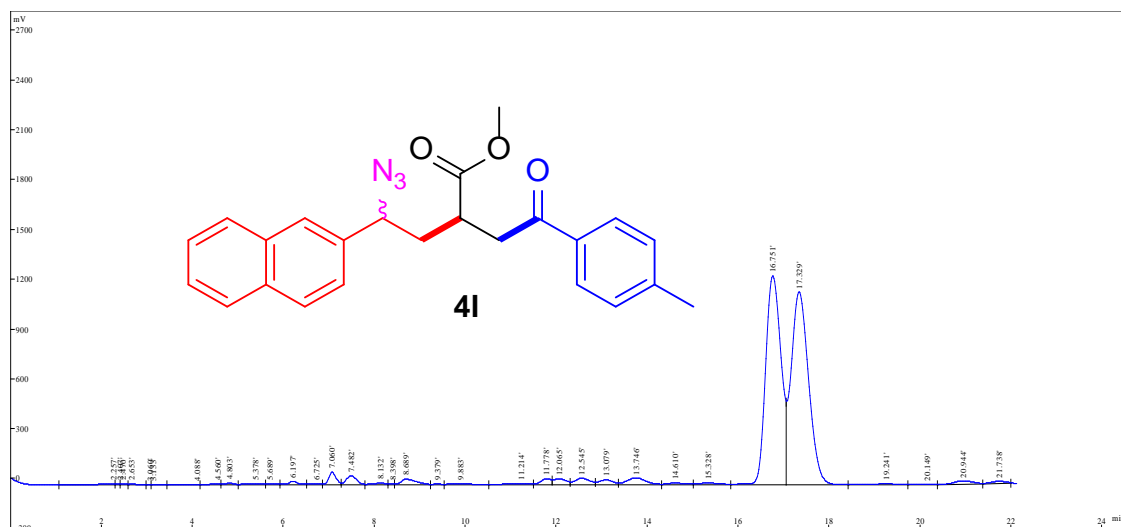

eluted by CH<sub>3</sub>CN:H<sub>2</sub>O=60:40

| 序号 | 保留时间   | 名称 | 浓度    | 峰面积      |
|----|--------|----|-------|----------|
| 29 | 16.751 |    | 42.07 | 29790410 |
| 30 | 17.329 |    | 43.66 | 30921952 |

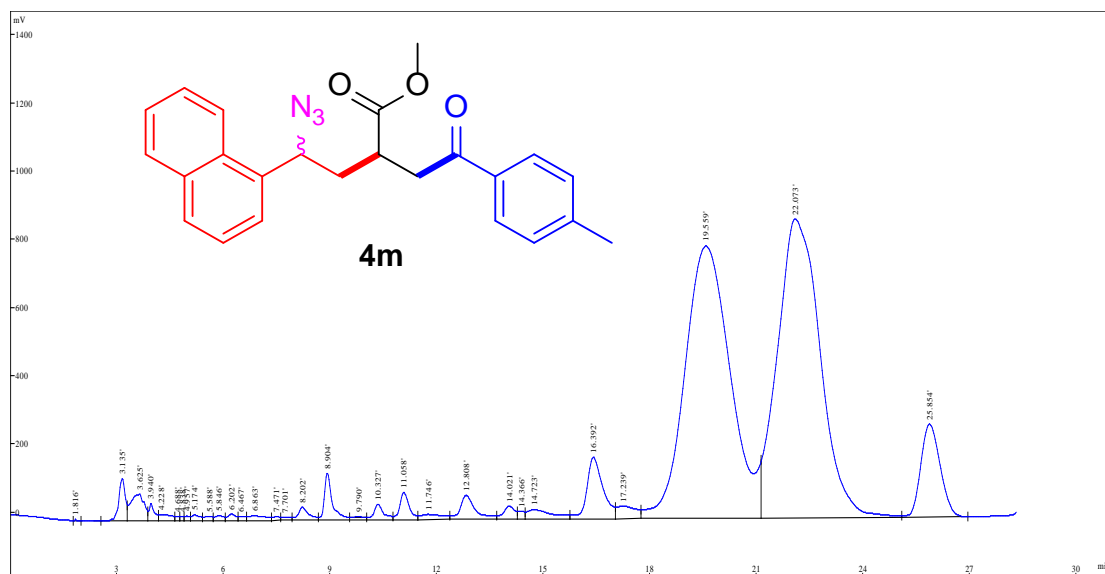

eluted by CH<sub>3</sub>CN:H<sub>2</sub>O=60:40

| 序号 | 保留时间   | 名称 | 浓度    | 峰面积      |
|----|--------|----|-------|----------|
| 29 | 19.559 |    | 39.24 | 71321869 |
| 30 | 22.073 |    | 40.41 | 73447571 |

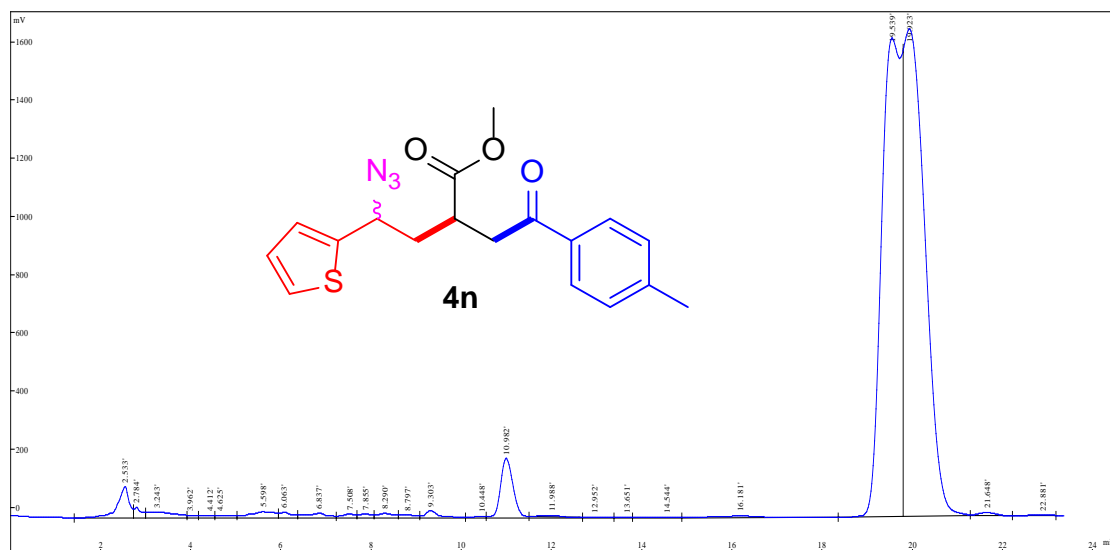

eluted by CH<sub>3</sub>CN:H<sub>2</sub>O=60:40

| 序号 | 保留时间   | 名称 | 浓度    | 峰面积      |
|----|--------|----|-------|----------|
| 22 | 19.539 |    | 43.46 | 51702736 |
| 23 | 19.923 |    | 45.12 | 53685510 |

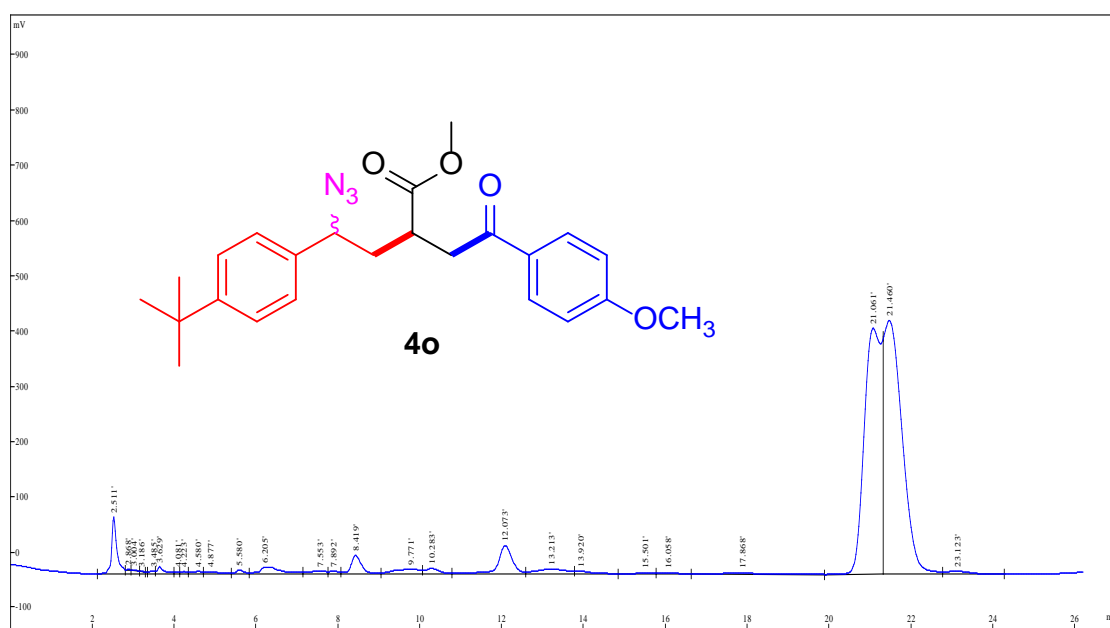

eluted by CH<sub>3</sub>CN:H<sub>2</sub>O=60:40

| 序号 | 保留时间   | 名称 | 浓度    | 峰面积      |
|----|--------|----|-------|----------|
| 24 | 21.061 |    | 40.23 | 13616904 |
| 25 | 21.460 |    | 40.74 | 13783984 |

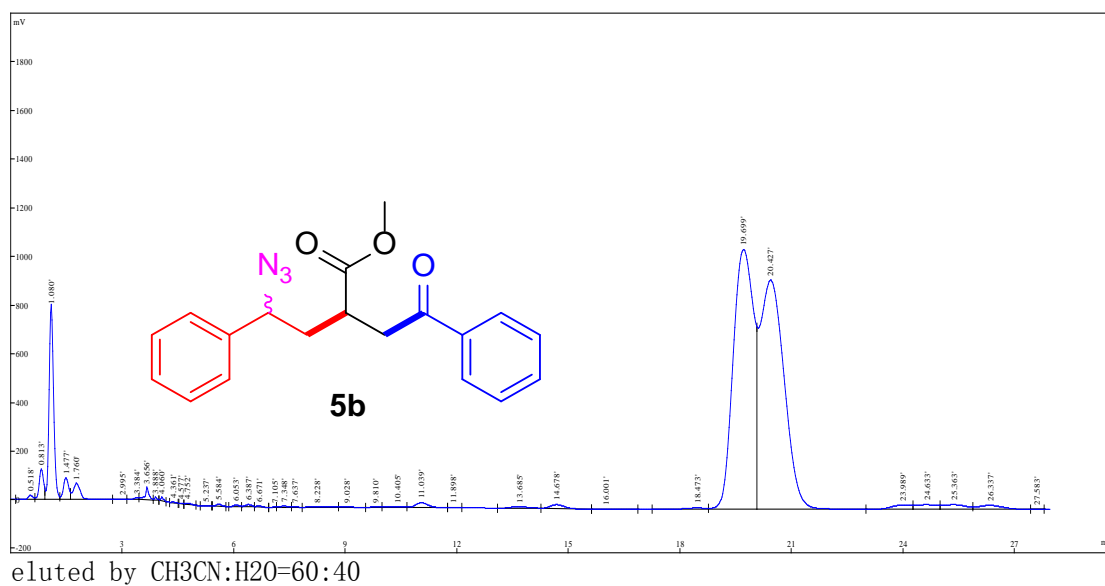

| 序号 | 保留时间   | 名称 | 浓度    | 峰面积      |
|----|--------|----|-------|----------|
| 32 | 19.699 |    | 41.33 | 41492576 |
| 33 | 20.427 |    | 42.37 | 42533322 |

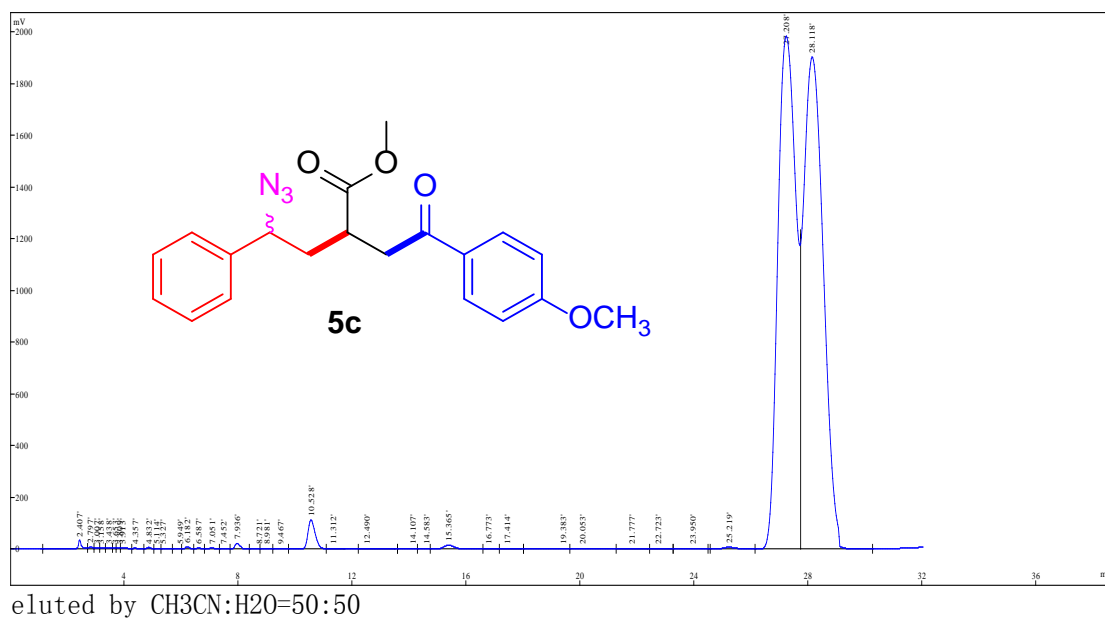

| 序号 | 保留时间   | 名称 | 浓度    | 峰面积      |
|----|--------|----|-------|----------|
| 36 | 27.208 |    | 48.97 | 91073715 |
| 37 | 28.118 |    | 47.84 | 88985702 |



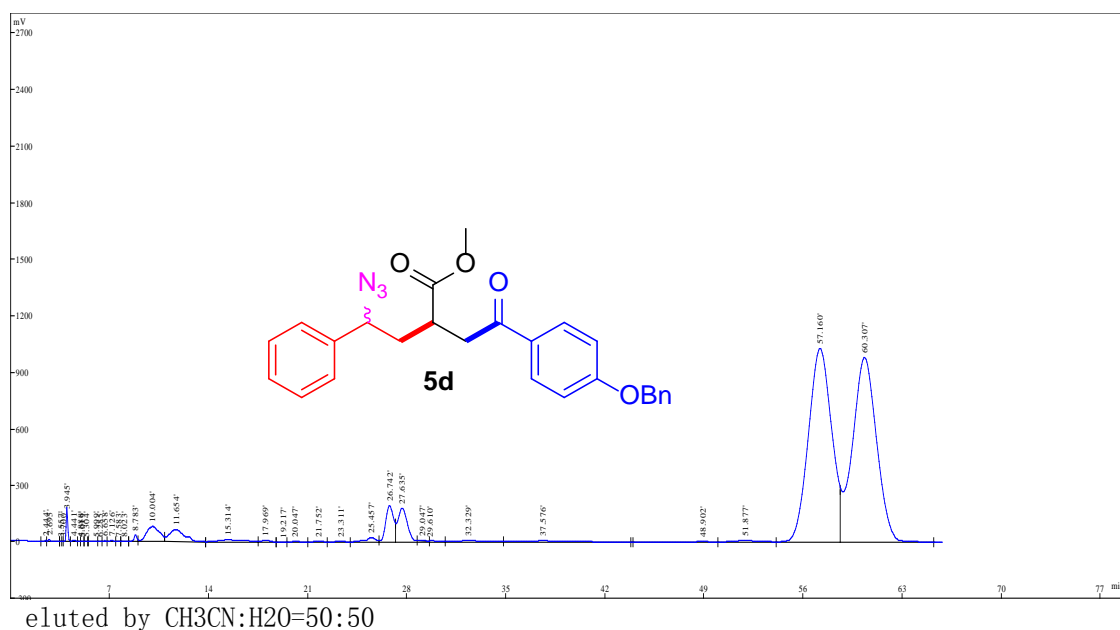

| 序号 | 保留时间   | 名称 | 浓度    | 峰面积       |
|----|--------|----|-------|-----------|
| 34 | 57.160 |    | 43.21 | 117925939 |
| 35 | 60.307 |    | 42.65 | 116411699 |

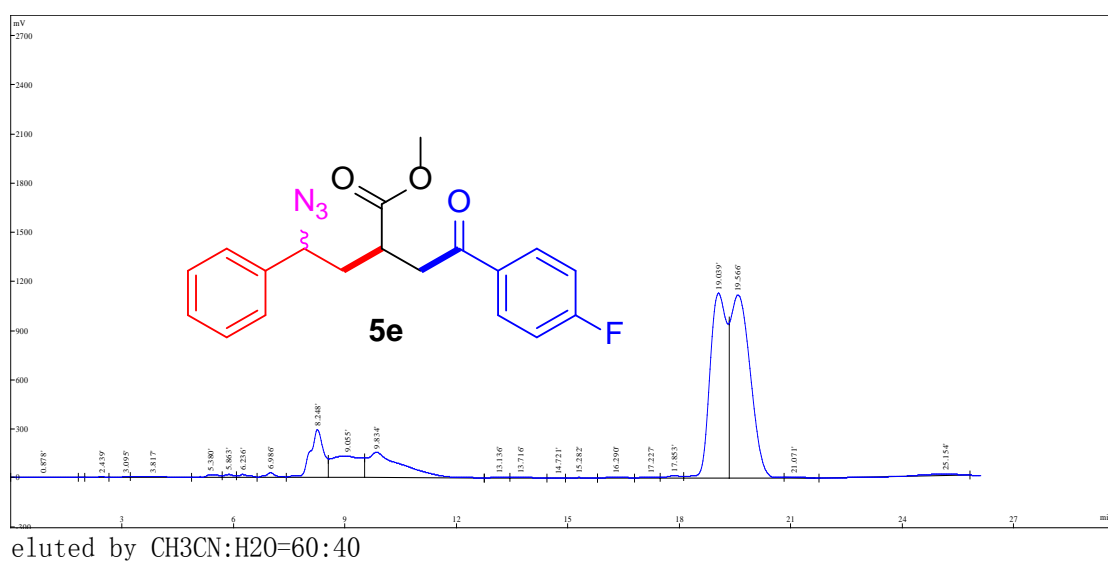

| 序号 | 保留时间   | 名称 | 浓度    | 峰面积      |
|----|--------|----|-------|----------|
| 19 | 19.039 |    | 34.72 | 37550038 |
| 20 | 19.566 |    | 36.49 | 39460355 |

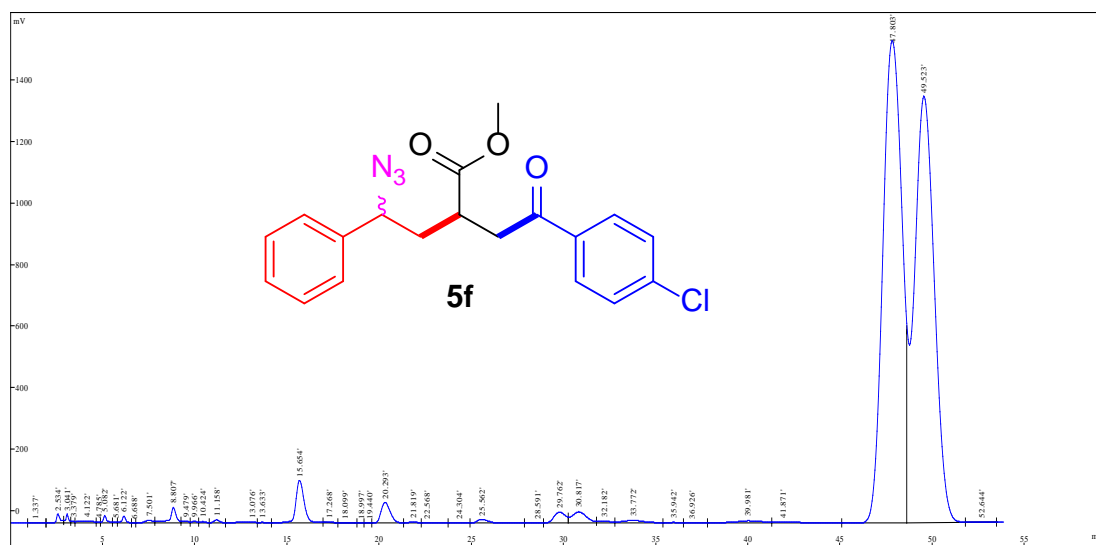

eluted by CH<sub>3</sub>CN:H<sub>2</sub>O=50:50

| 序号 | 保留时间   | 名称 | 浓度    | 峰面积       |
|----|--------|----|-------|-----------|
| 38 | 47.803 |    | 46.67 | 111726182 |
| 39 | 49.523 |    | 44.37 | 106242291 |

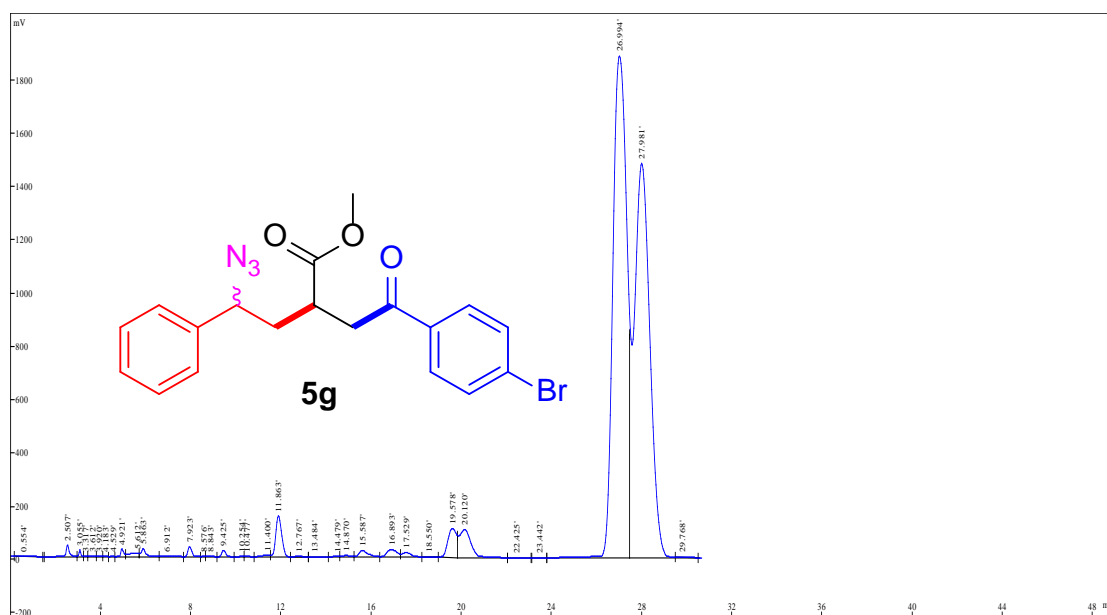

eluted by CH<sub>3</sub>CN:H<sub>2</sub>O=60:40

| 序号 | 保留时间   | 名称 | 浓度    | 峰面积      |
|----|--------|----|-------|----------|
| 33 | 26.994 |    | 47.37 | 80765549 |
| 34 | 27.981 |    | 41.65 | 71043034 |

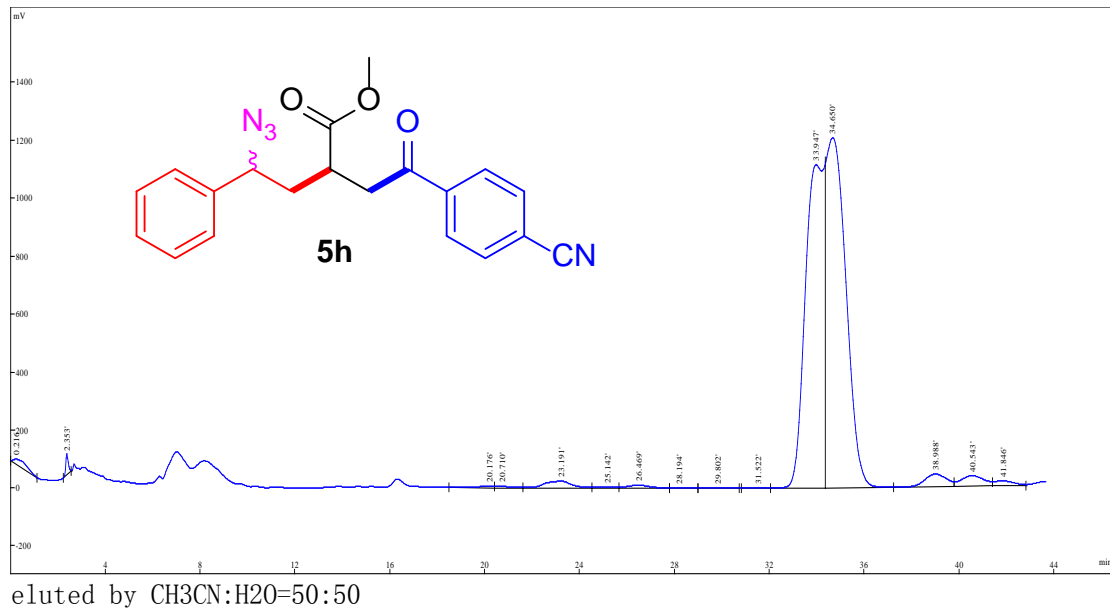

| 序号 | 保留时间   | 名称 | 浓度    | 峰面积      |
|----|--------|----|-------|----------|
| 11 | 33.947 |    | 45.03 | 63649491 |
| 12 | 34.650 |    | 47.87 | 67661773 |

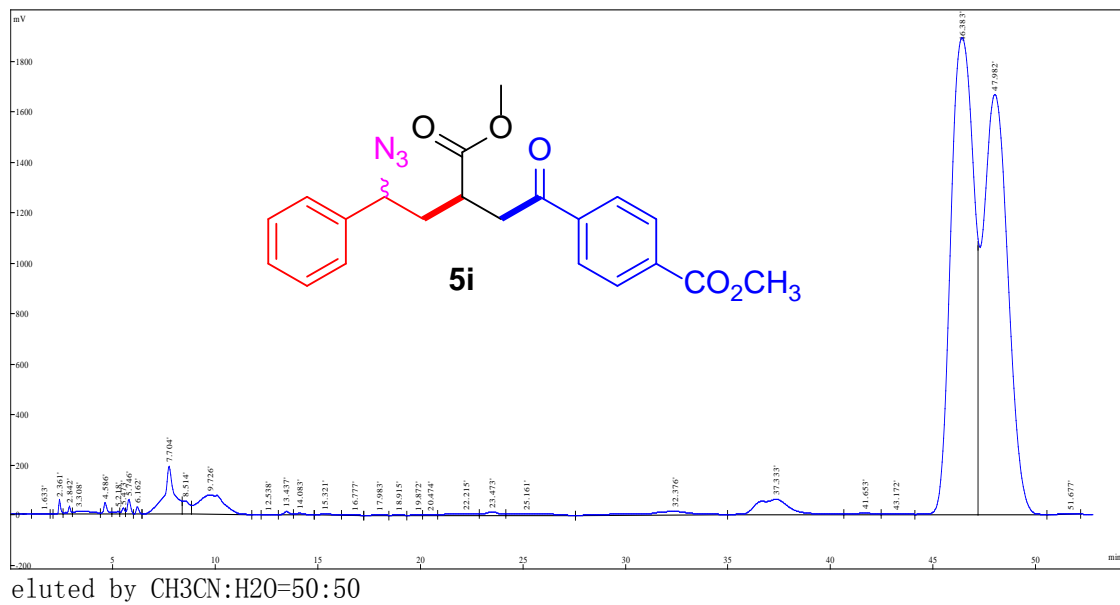

| 序号 | 保留时间   | 名称 | 浓度    | 峰面积       |
|----|--------|----|-------|-----------|
| 29 | 46.383 |    | 45.91 | 148551181 |
| 30 | 47.982 |    | 42.94 | 138892480 |

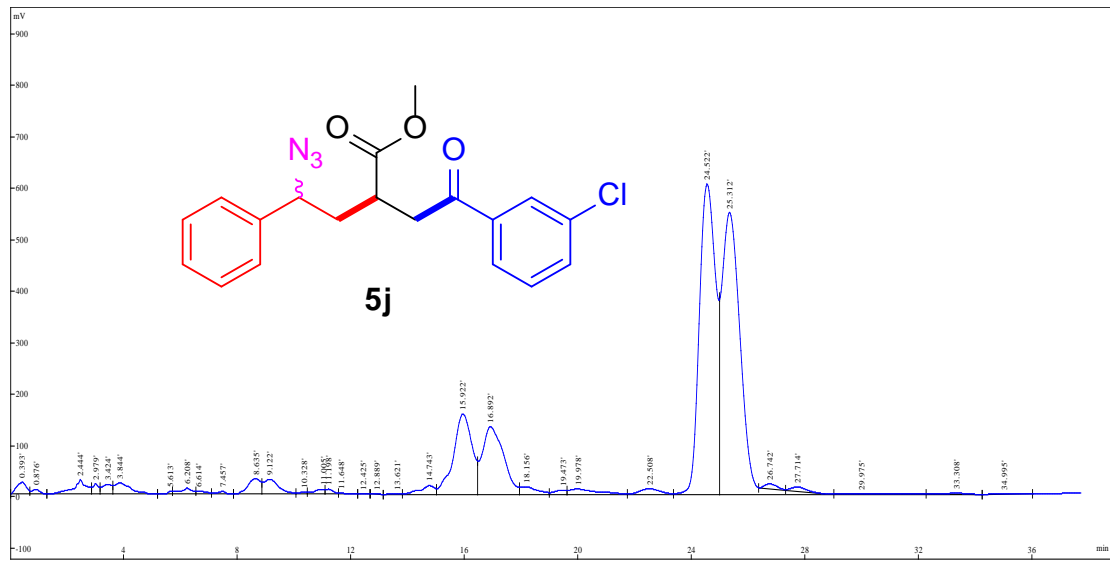

eluted by CH<sub>3</sub>CN:H<sub>2</sub>O=60:40

| 序号 | 保留时间   | 名称 | 浓度    | 峰面积      |
|----|--------|----|-------|----------|
| 27 | 24.522 |    | 32.76 | 24911237 |
| 28 | 25.312 |    | 33.29 | 25315405 |

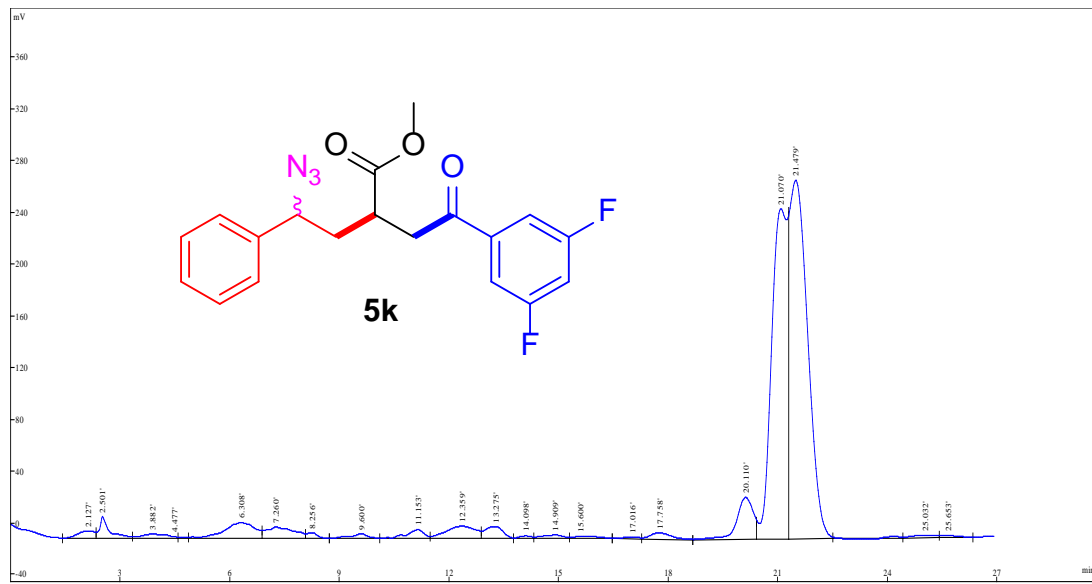

eluted by CH<sub>3</sub>CN:H<sub>2</sub>O=60:40

| 序号 | 保留时间   | 名称 | 浓度    | 峰面积     |
|----|--------|----|-------|---------|
| 18 | 21.070 |    | 37.16 | 8182904 |
| 19 | 21.479 |    | 41.27 | 9084936 |

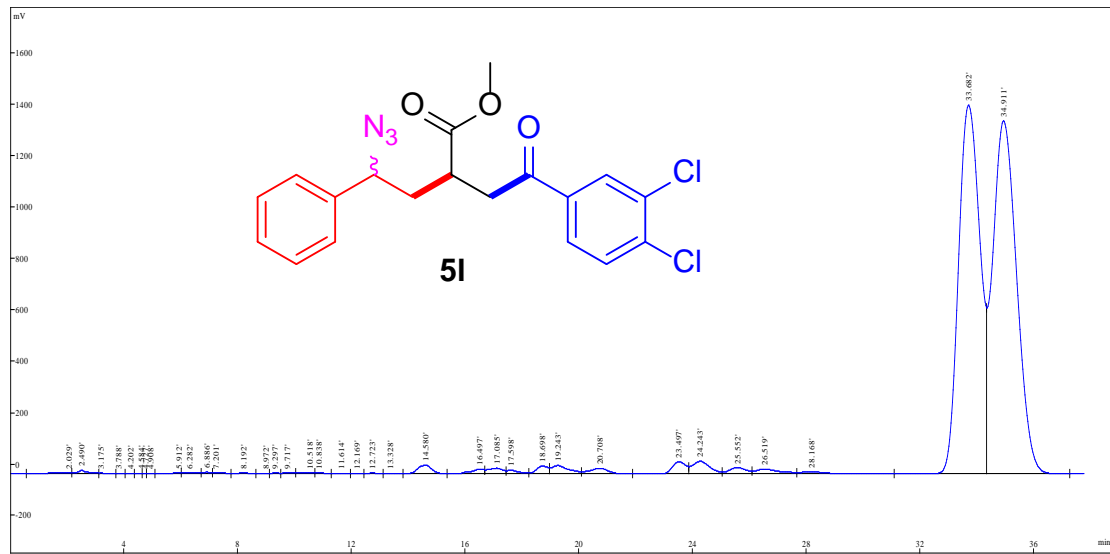

eluted by CH<sub>3</sub>CN:H<sub>2</sub>O=60:40

| 序号 | 保留时间   | 名称 | 浓度    | 峰面积      |
|----|--------|----|-------|----------|
| 35 | 33.682 |    | 46.7  | 80043334 |
| 36 | 34.911 |    | 44.23 | 75807501 |

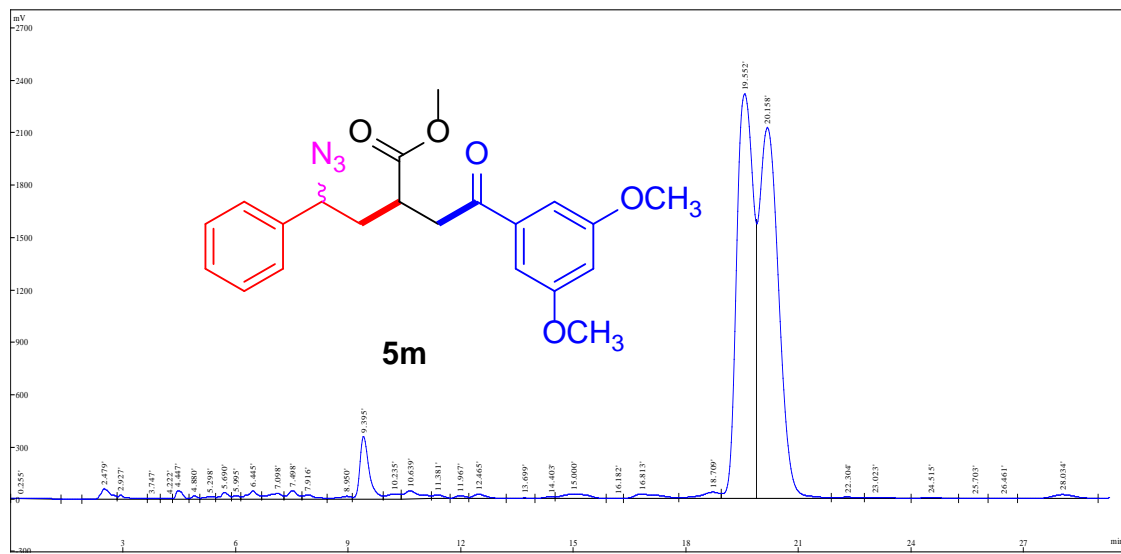

eluted by CH<sub>3</sub>CN:H<sub>2</sub>O=60:40

| 序号 | 保留时间   | 名称 | 浓度    | 峰面积      |
|----|--------|----|-------|----------|
| 28 | 19.852 |    | 40.93 | 72734874 |
| 29 | 20.158 |    | 43.96 | 78099718 |

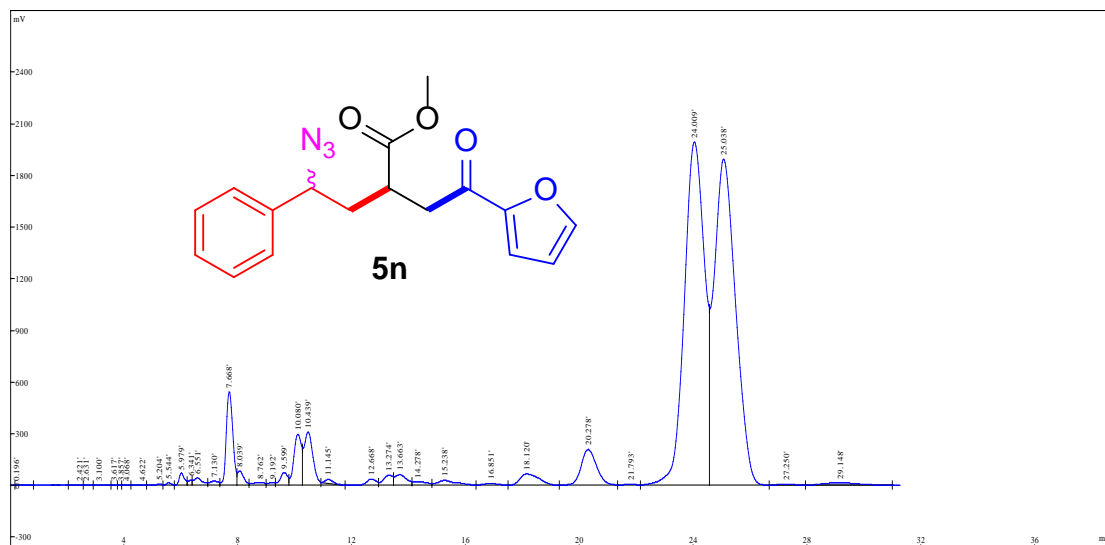

eluted by CH3CN:H2O=60:40

| 序号 | 保留时间   | 名称 | 浓度    | 峰面积      |
|----|--------|----|-------|----------|
| 32 | 24.009 |    | 40.13 | 98738246 |
| 33 | 25.038 |    | 40.17 | 98854323 |

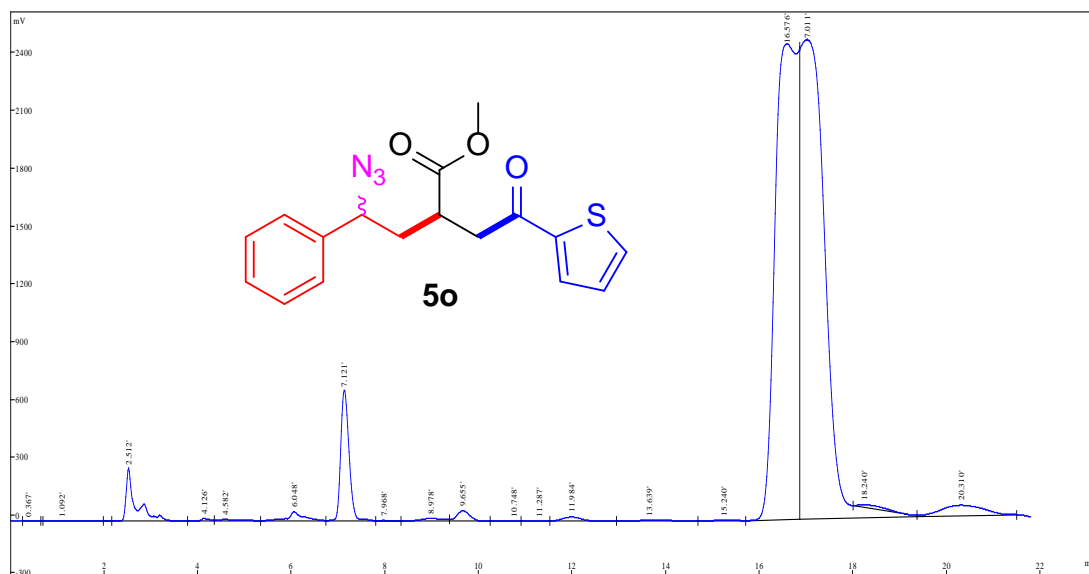

eluted by CH3CN:H2O=60:40

| 序号 | 保留时间   | 名称 | 浓度    | 峰面积      |
|----|--------|----|-------|----------|
| 16 | 16.576 |    | 43.8  | 86339834 |
| 17 | 17.011 |    | 44.36 | 87468742 |

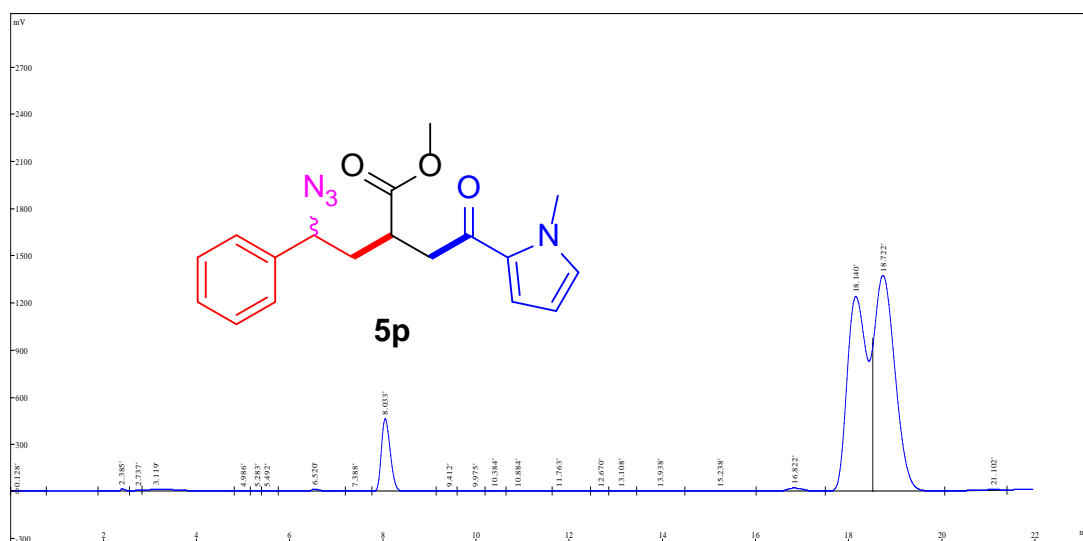

eluted by CH3CN:H2O=60:40

| 序号 | 保留时间   | 名称 | 浓度    | 峰面积      |
|----|--------|----|-------|----------|
| 21 | 18.140 |    | 43.34 | 38660022 |
| 22 | 18.722 |    | 45.21 | 40329760 |

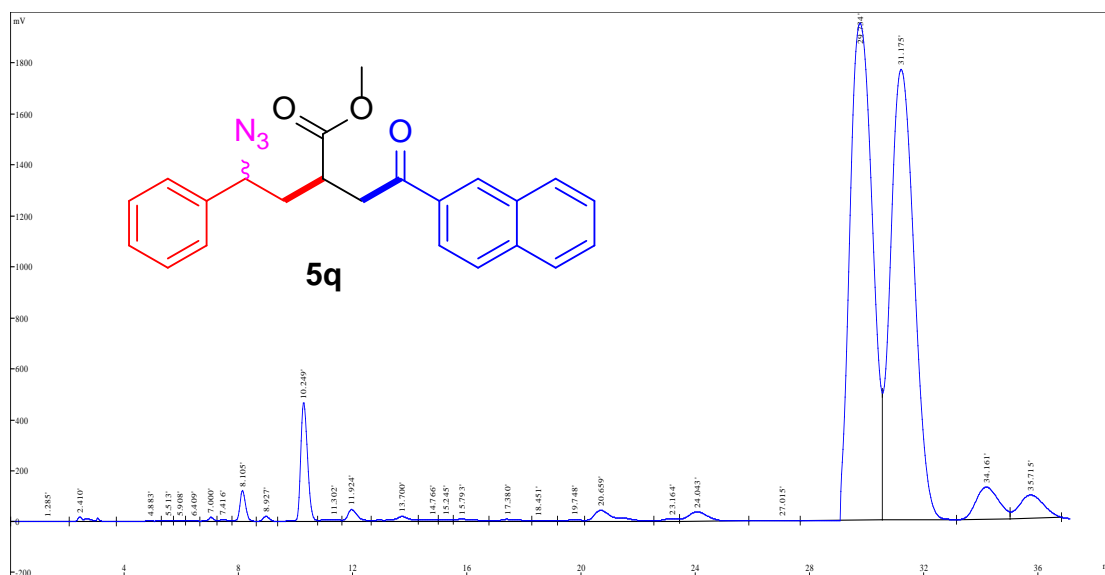

eluted by CH3CN:H2O=60:40

| 序号 | 保留时间   | 名称 | 浓度    | 峰面积       |
|----|--------|----|-------|-----------|
| 25 | 29.734 |    | 44.38 | 106708192 |
| 26 | 31.175 |    | 42.46 | 102114970 |

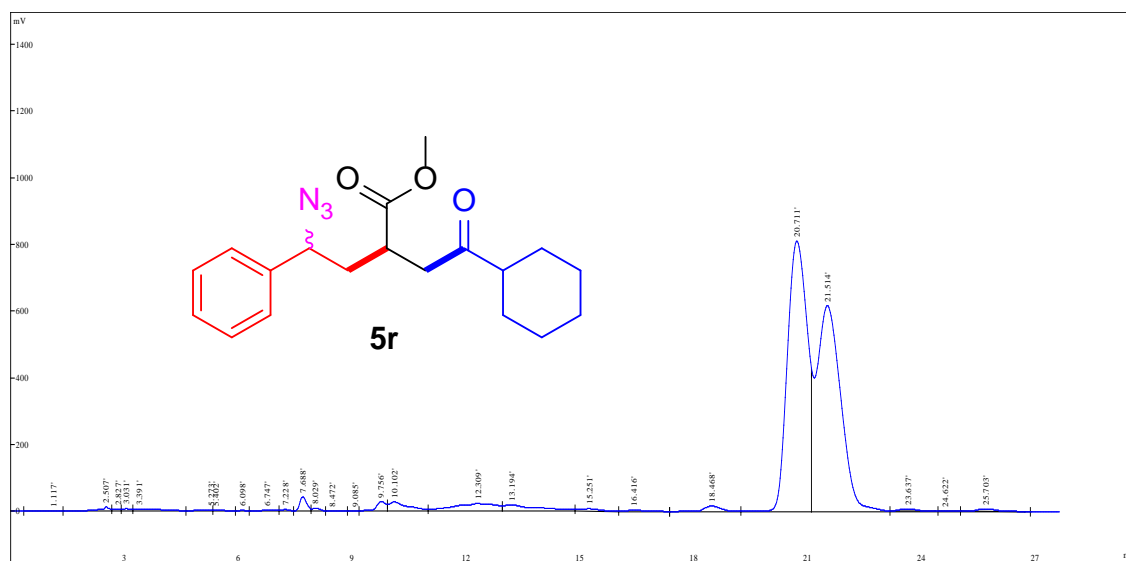

eluted by CH<sub>3</sub>CN:H<sub>2</sub>O=70:30

| 序号 | 保留时间   | 名称 | 浓度    | 峰面积      |
|----|--------|----|-------|----------|
| 22 | 20.711 |    | 45.59 | 30917715 |
| 23 | 21.514 |    | 37.84 | 25671790 |

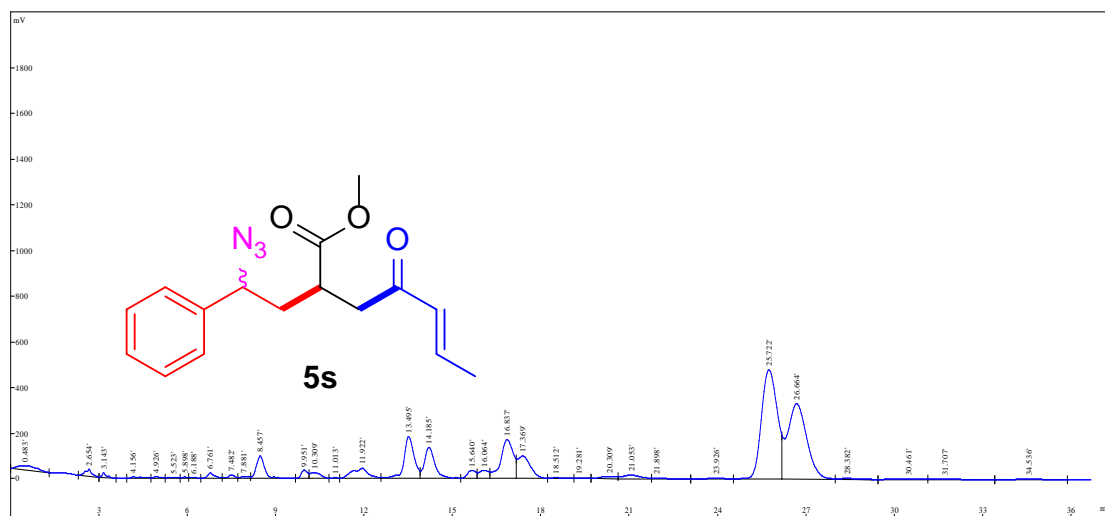

eluted by CH<sub>3</sub>CN:H<sub>2</sub>O=70:30

| 序号 | 保留时间   | 名称 | 浓度    | 峰面积      |
|----|--------|----|-------|----------|
| 29 | 25.722 |    | 29.6  | 18081656 |
| 30 | 26.664 |    | 25.45 | 15550032 |



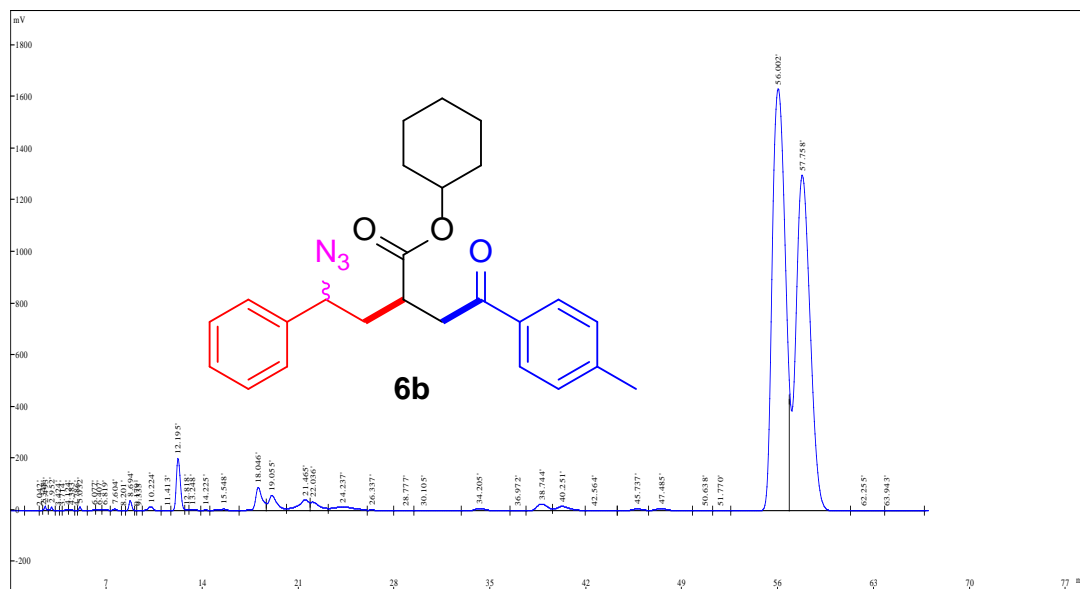

eluted by CH<sub>3</sub>CN:H<sub>2</sub>O=50:50

| 序号 | 保留时间   | 名称 | 浓度    | 峰面积       |
|----|--------|----|-------|-----------|
| 43 | 56.002 |    | 46.61 | 107026285 |
| 44 | 57.754 |    | 41.42 | 95137466  |

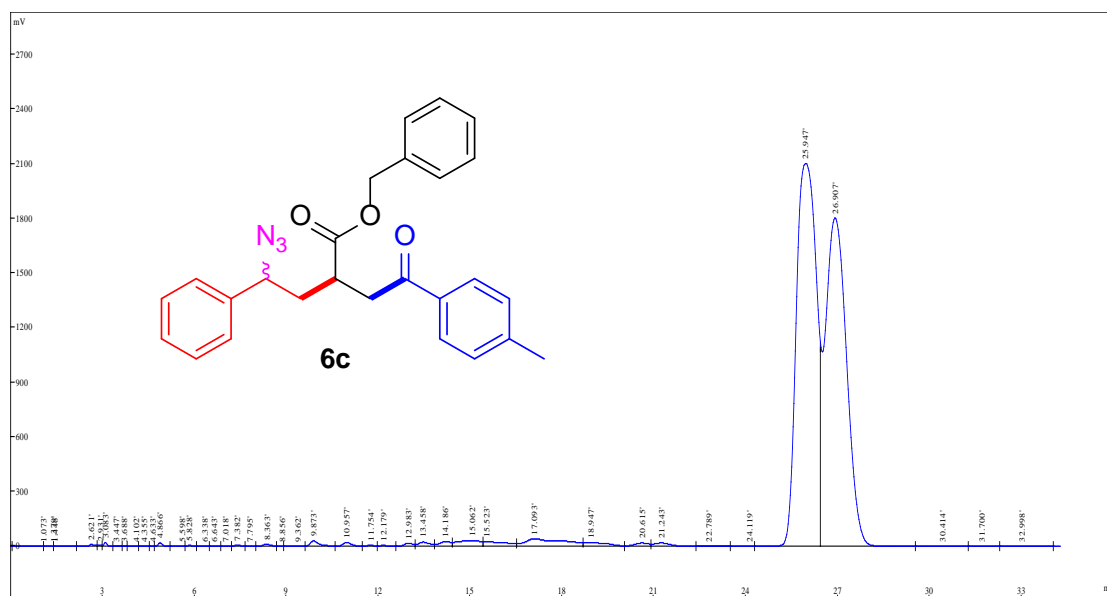

eluted by CH<sub>3</sub>CN:H<sub>2</sub>O=60:40

| 序号 | 保留时间   | 名称 | 浓度    | 峰面积      |
|----|--------|----|-------|----------|
| 38 | 25.947 |    | 48.32 | 95754989 |
| 39 | 26.907 |    | 44.21 | 87646214 |

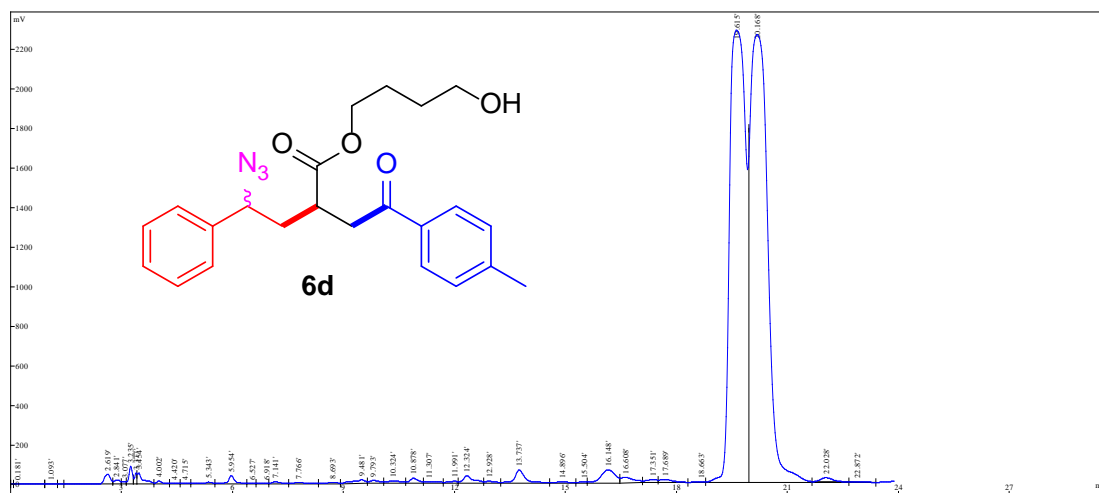

eluted by CH3CN:H2O=70:30

| 序号 | 保留时间   | 名称 | 浓度    | 峰面积      |
|----|--------|----|-------|----------|
| 36 | 19.615 |    | 46.35 | 72553306 |
| 37 | 20.168 |    | 45.43 | 71099027 |

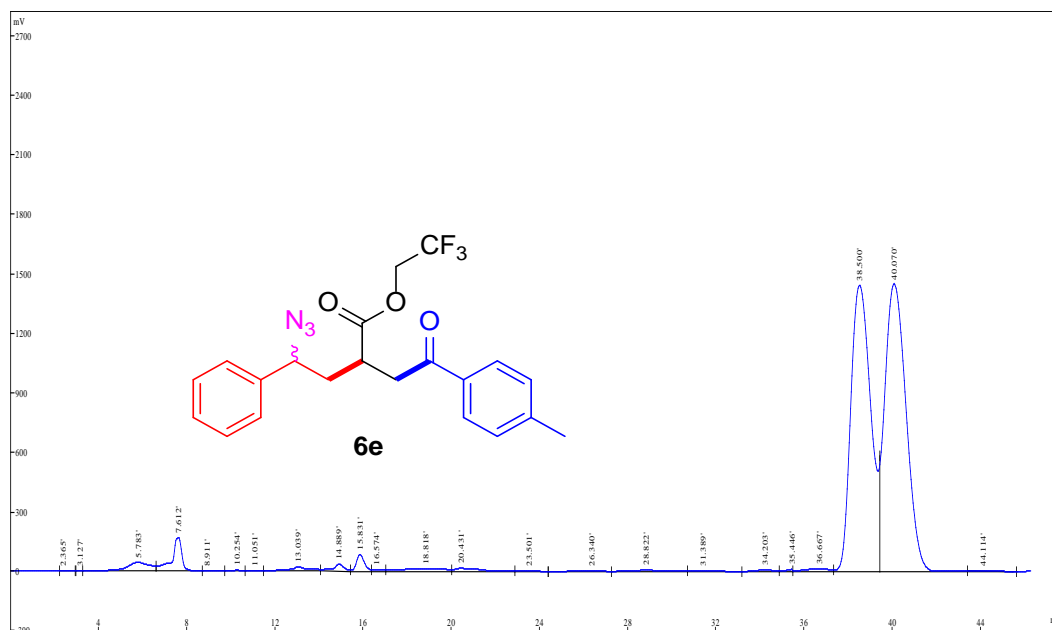

eluted by CH3CN:H2O=50:50

| 序号 | 保留时间   | 名称 | 浓度    | 峰面积      |
|----|--------|----|-------|----------|
| 21 | 38.500 |    | 43.11 | 92855936 |
| 22 | 40.070 |    | 44.56 | 95974534 |

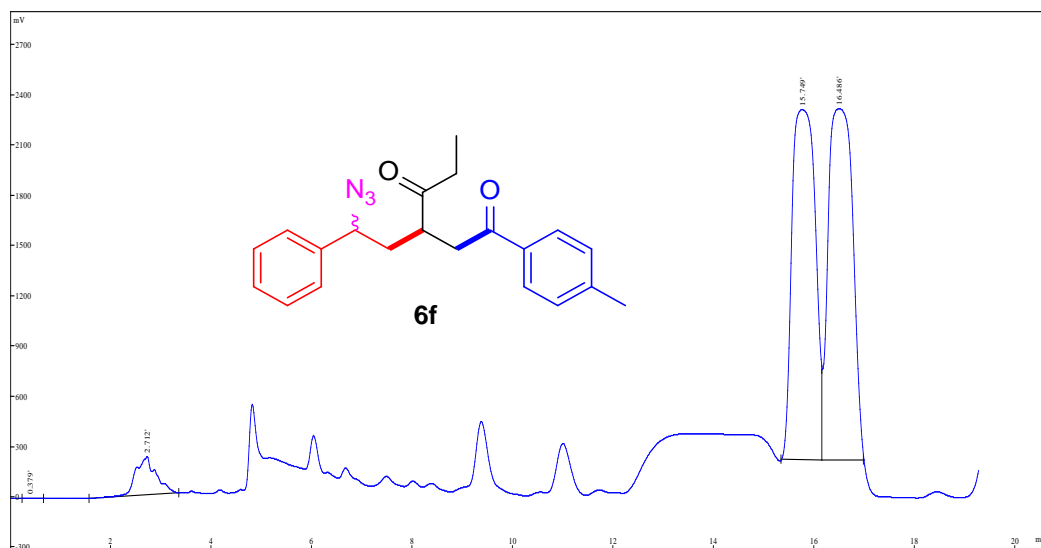

eluted by CH<sub>3</sub>CN:H<sub>2</sub>O=60:40

| 序号 | 保留时间   | 名称 | 浓度    | 峰面积      |
|----|--------|----|-------|----------|
| 3  | 15.749 |    | 46.66 | 67610835 |
| 4  | 16.486 |    | 48.84 | 70759226 |

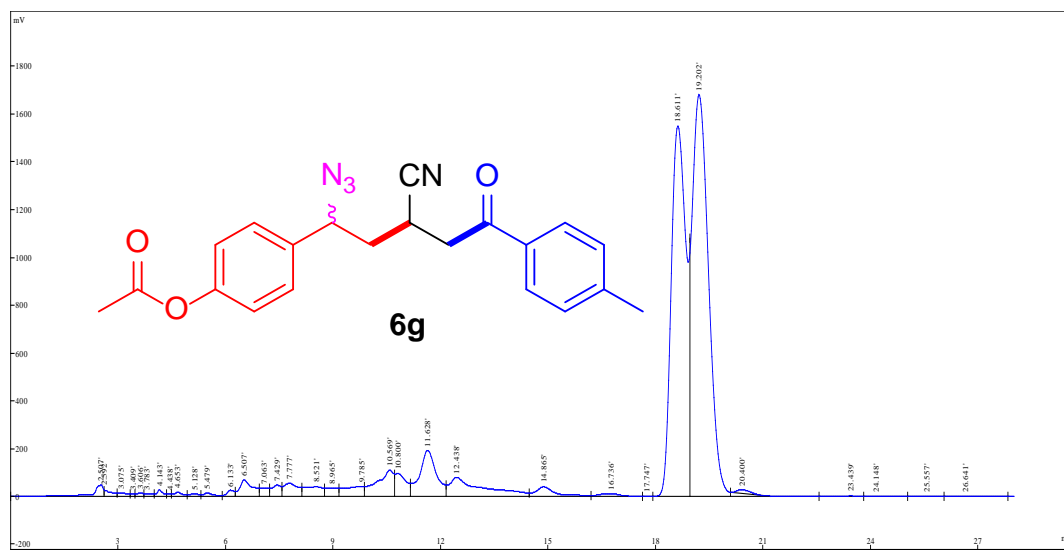

eluted by CH<sub>3</sub>CN:H<sub>2</sub>O=50:50

| 序号 | 保留时间   | 名称 | 浓度    | 峰面积      |
|----|--------|----|-------|----------|
| 27 | 18.611 |    | 35.24 | 46625856 |
| 28 | 19.202 |    | 39.29 | 51963405 |

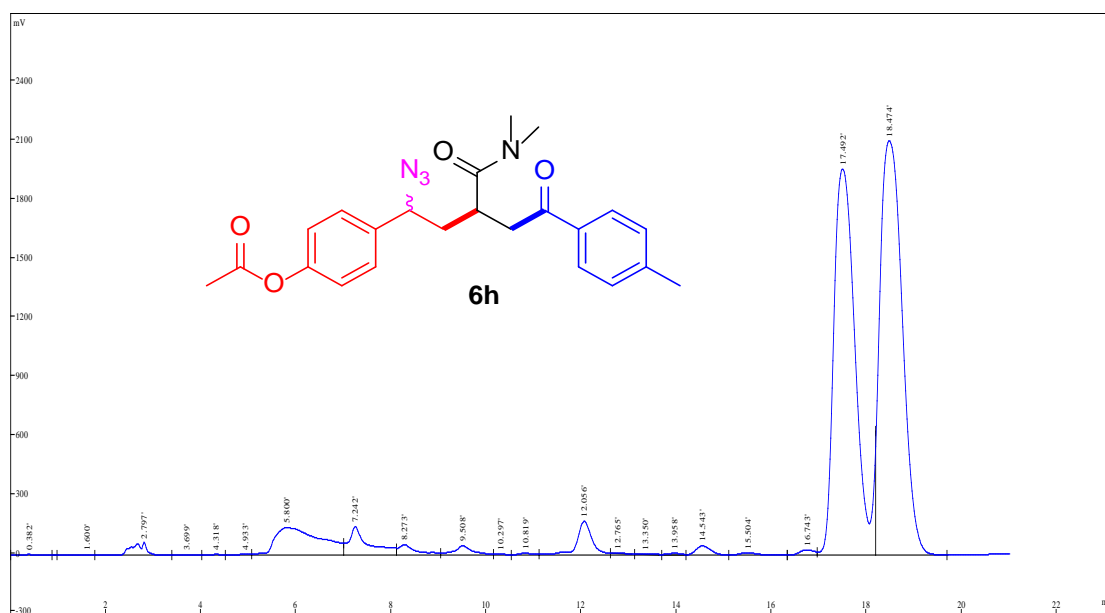

eluted by CH<sub>3</sub>CN:H<sub>2</sub>O=50:50

| 序号 | 保留时间   | 名称 | 浓度    | 峰面积      |
|----|--------|----|-------|----------|
| 20 | 17.492 |    | 39.57 | 61709952 |
| 21 | 18.474 |    | 43.23 | 67430765 |

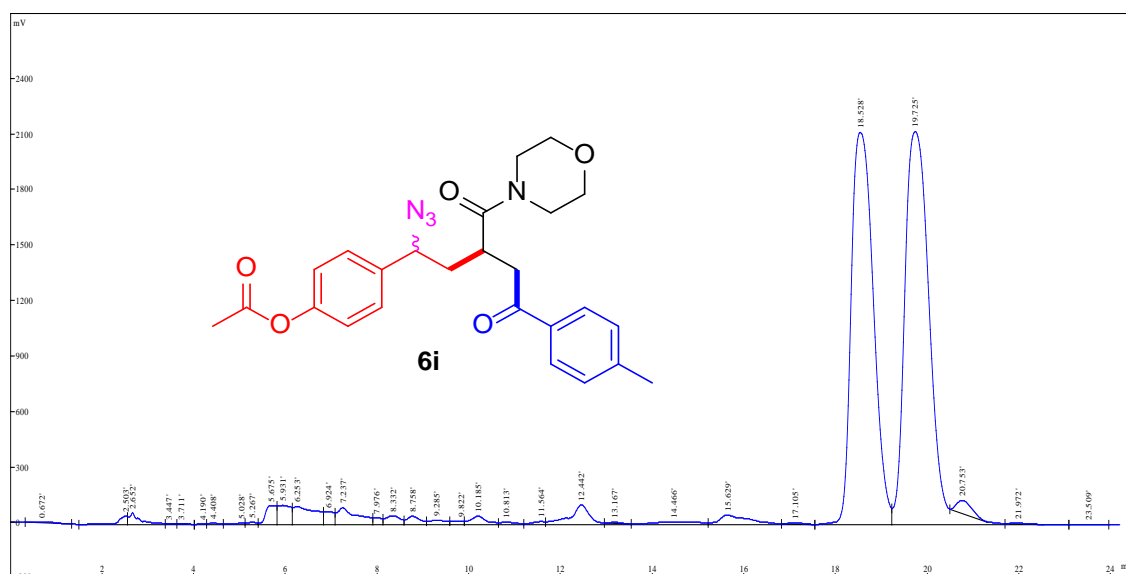

eluted by CH<sub>3</sub>CN:H<sub>2</sub>O=50:50

| 序号 | 保留时间   | 名称 | 浓度    | 峰面积      |
|----|--------|----|-------|----------|
| 28 | 18.528 |    | 39.58 | 71258368 |
| 29 | 19.725 |    | 44.67 | 80424378 |

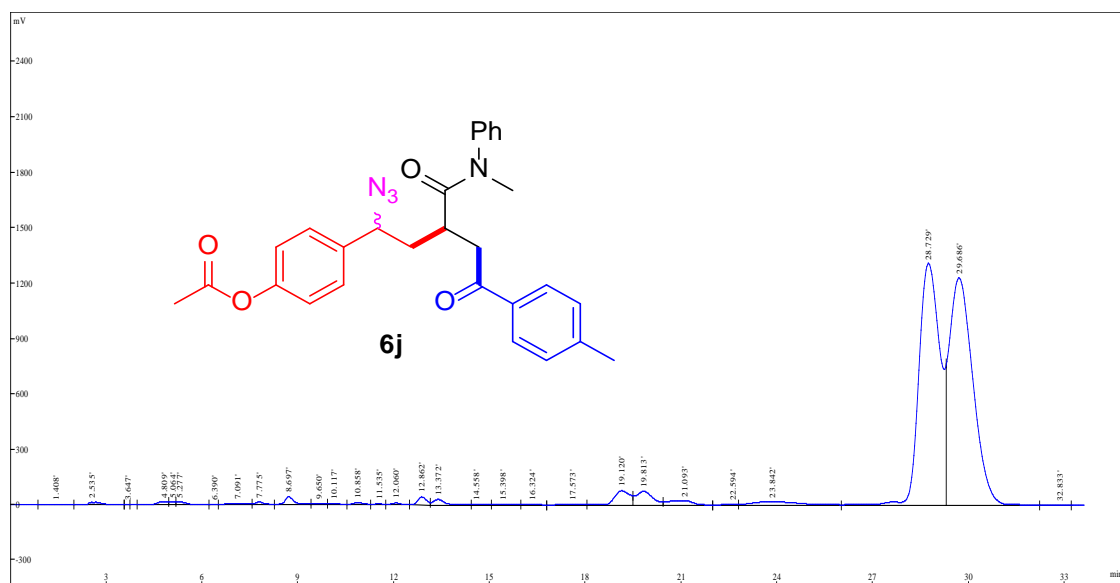

eluted by CH<sub>3</sub>CN:H<sub>2</sub>O=50:50

| 序号 | 保留时间   | 名称 | 浓度    | 峰面积      |
|----|--------|----|-------|----------|
| 27 | 28.729 |    | 42.64 | 61472883 |
| 28 | 29.686 |    | 43.45 | 62646003 |
